# Supplementary material for: Morphological Changes Induced by TKS4 Deficiency Can Be Reversed by EZH2 Inhibition
Source: Preprints.org preprint supplement (doi:10.20944/preprints202403.0787.v1), 2024-03-13
Supplement: Supplementary file 1 [file supplementary]

## Sheet: A (WTT_WT_lncRNA)
test_id	gene_id	gene	%	locus	sample_1	sample_2	value_1	value_2	log2(fold_change)	value_1_corrected	value_2_corrected	log2(fold_change)_corrected	test_stat	p_value	-log10(p_value)	q_value	type	chr_name	chr_location	chain	ENSG_id
XLOC_025445	XLOC_025445	A1BG-AS1	-8.93926	chr19:58345182-58366578	TKS4_WT	TKS4_WT_T	31.2442	28.4512	-0.135099	31.2442	28.4512	-0.135099	0	1	0	1	lncRNA	chr19	58347718-58355455	+	ENSG00000268895.6
XLOC_010255	XLOC_010255	A2M-AS1	-73.031	chr12:8950043-9215657	TKS4_WT	TKS4_WT_T	949.465	256.061	-1.89063	949.465	256.061	-1.89063	-1.2529	0.40125	0.396585	0.999503	lncRNA	chr12	9065163-9068689	+	ENSG00000245105.4
XLOC_037256	XLOC_037256	AADACL2-AS1	-22.5918	chr3:151733926-151928175	TKS4_WT	TKS4_WT_T	249.953	193.484	-0.369445	249.953	193.484	-0.369443	-0.0759626	0.8533	0.0688983	0.999503	lncRNA	chr3	151751443-151928175	-	ENSG00000242908.6
XLOC_033349	XLOC_033349	AATBC	-68.0167	chr21:43805757-43812567	TKS4_WT	TKS4_WT_T	266.869	85.3536	-1.64461	266.869	85.3536	-1.64461	-1.08877	0.2444	0.611899	0.999503	lncRNA	chr21	43805758-43812567	-	ENSG00000215458.8
XLOC_031598	XLOC_031598	ABALON	80.5226	chr20:31664451-31723963	TKS4_WT	TKS4_WT_T	7407.66	13372.5	0.852174	7407.66	13372.5	0.852179	0.182855	0.6808	0.16698	0.999503	lncRNA	chr20	31721507-31723409	+	ENSG00000281376.1
XLOC_005635	XLOC_005635	ACTA2-AS1	426.7	chr10:88932683-89017059	TKS4_WT	TKS4_WT_T	120.201	633.099	2.39699	120.201	633.099	2.39698	0.270484	0.3441	0.463315	0.999503	lncRNA	chr10	88932390-88940820	+	ENSG00000180139.11
XLOC_030410	XLOC_030410	ACTR3-AS1	-99.6799	chr2:113831182-113962596	TKS4_WT	TKS4_WT_T	31.2442	0		31.2442	0.1	-8.28744	0	1	0	1	lncRNA	chr2	113831049-113891020	-	ENSG00000228857.3
XLOC_036418	XLOC_036418	ACVR2B-AS1	-24.1304	chr3:38346759-38493142	TKS4_WT	TKS4_WT_T	408.762	310.126	-0.398406	408.762	310.126	-0.398407	-0.0287515	0.8265	0.0827571	0.999503	lncRNA	chr3	38451027-38454820	-	ENSG00000229589.1
XLOC_003861	XLOC_003861	ADAMTSL4-AS1	14.4438	chr1:150548563-150579738	TKS4_WT	TKS4_WT_T	247027	282707	0.194639	247027	282707	0.194639	0.205082	0.77375	0.111399	0.999503	lncRNA
XLOC_010521	XLOC_010521	ADCY6-DT	404.334	chr12:48789146-48790535	TKS4_WT	TKS4_WT_T	141.893	715.615	2.33439	141.893	715.615	2.33438	1.15923	0.10015	0.999349	0.999503	lncRNA	chr12	48789147-48790535	+	ENSG00000257660.5
XLOC_024548	XLOC_024548	ADGRL1-AS1	15.8956	chr19:14137151-14206245	TKS4_WT	TKS4_WT_T	343.686	398.317	0.212825	343.686	398.317	0.212826	0	1	0	1	lncRNA	chr19	14137146-14171267	+	ENSG00000267169.2
XLOC_006698	XLOC_006698	ADIRF-AS1	-18.7171	chr10:86965286-87010226	TKS4_WT	TKS4_WT_T	14908.3	12117.9	-0.298969	14908.3	12117.9	-0.298976	-0.115356	0.864	0.0634863	0.999503	lncRNA	chr10	86965345-86971311	-	ENSG00000272734.1
XLOC_031842	XLOC_031842	ADNP-AS1	48.7266	chr20:50888917-50958564	TKS4_WT	TKS4_WT_T	163.584	243.293	0.572662	163.584	243.293	0.572663	0.0190113	0.79995	0.0969372	0.999503	lncRNA	chr20	50930984-50945148	+	ENSG00000259456.4
XLOC_016824	XLOC_016824	ADPGK-AS1	70.4495	chr15:72751293-72798199	TKS4_WT	TKS4_WT_T	567.57	967.42	0.769344	567.57	967.42	0.769344	0.0805835	0.6649	0.177244	0.999503	lncRNA	chr15	72782835-72798199	+	ENSG00000260898.6
XLOC_037895	XLOC_037895	AFAP1-AS1	293.704	chr4:7754089-7940296	TKS4_WT	TKS4_WT_T	403.986	1590.51	1.97711	403.986	1590.51	1.97711	0.267738	0.4013	0.396531	0.999503	lncRNA	chr4	7754077-7778928	+	ENSG00000272620.2
XLOC_045872	XLOC_045872	AFDN-DT	-43.6546	chr6:167823889-167972023	TKS4_WT	TKS4_WT_T	249.953	140.837	-0.827629	249.953	140.837	-0.82763	-0.0592341	0.74405	0.128398	0.999503	lncRNA	chr6	167822103-167826833	-	ENSG00000198221.11
XLOC_029356	XLOC_029356	AGAP1-IT1	-9.7512	chr2:235494042-236131795	TKS4_WT	TKS4_WT_T	755.035	681.41	-0.148021	755.035	681.41	-0.14802	-0.0140533	0.93795	0.0278203	0.999503	lncRNA	chr2	235505553-235507566	+	ENSG00000235529.2
XLOC_010723	XLOC_010723	AGAP2-AS1	8.30592	chr12:57723760-57742201	TKS4_WT	TKS4_WT_T	9868.99	10688.7	0.115118	9868.99	10688.7	0.115112	0.0573555	0.91895	0.0367081	0.999503	lncRNA	chr12	57726271-57728356	+	ENSG00000255737.2
XLOC_006599	XLOC_006599	AGAP5	-0.949852	chr10:73674274-73730514	TKS4_WT	TKS4_WT_T	8571.86	8490.44	-0.0137687	8571.86	8490.44	-0.013769	-0.0137248	0.9855	0.00634337	0.999503	lncRNA
XLOC_050413	XLOC_050413	AGK-DT	-99.6799	chr7:141073401-141551308	TKS4_WT	TKS4_WT_T	31.2442	0		31.2442	0.1	-8.28744	0	1	0	1	lncRNA	chr7	141500079-141551304	-	ENSG00000261570.2
XLOC_028135	XLOC_028135	ALMS1-IT1	42.5248	chr2:73385757-73609919	TKS4_WT	TKS4_WT_T	1245.79	1775.56	0.511216	1245.79	1775.56	0.511213	0.0660382	0.78475	0.105269	0.999503	lncRNA	chr2	73456764-73459482	+	ENSG00000230002.3
XLOC_021768	XLOC_021768	ALOX12-AS1	144.033	chr17:6985122-7012334	TKS4_WT	TKS4_WT_T	57.7122	140.837	1.28708	57.7122	140.837	1.28708	0.368104	0.53755	0.269581	0.999503	lncRNA	chr17	6875232-7012530	-	ENSG00000215067.11
XLOC_030953	XLOC_030953	ANKRD44-IT1	-99.936	chr2:196962616-197310787	TKS4_WT	TKS4_WT_T	156.221	0		156.221	0.1	-10.6094	0	1	0	1	lncRNA	chr2	197250858-197302519	-	ENSG00000236977.1
XLOC_001216	XLOC_001216	AP4B1-AS1	-77.6063	chr1:113812611-113914086	TKS4_WT	TKS4_WT_T	247.765	55.4838	-2.15883	247.765	55.4838	-2.15883	-0.115171	0.32215	0.491942	0.999503	lncRNA	chr1	113856635-113901237	+	ENSG00000226167.1
XLOC_031900	XLOC_031900	APCDD1L-DT	-99.8933	chr20:58459100-58619892	TKS4_WT	TKS4_WT_T	93.7326	0		93.7326	0.1	-9.87241	0	1	0	1	lncRNA	chr20	58515379-58619888	+	ENSG00000231290.6
XLOC_049968	XLOC_049968	APTR	-18.1493	chr7:77653340-77783022	TKS4_WT	TKS4_WT_T	5040.47	4125.66	-0.288932	5040.47	4125.66	-0.288933	-0.0945205	0.8948	0.048274	0.999503	lncRNA	chr7	77657659-77696277	-	ENSG00000214293.10
XLOC_008008	XLOC_008008	ARAP1-AS2	-99.6799	chr11:72685068-72752408	TKS4_WT	TKS4_WT_T	31.2442	0		31.2442	0.1	-8.28744	0	1	0	1	lncRNA	chr11	72700474-72705607	+	ENSG00000245148.2
XLOC_035210	XLOC_035210	ARF4-AS1	-58.7365	chr3:57556273-57693118	TKS4_WT	TKS4_WT_T	882.599	364.191	-1.27706	882.599	364.191	-1.27706	-0.0545826	0.46425	0.333248	0.999503	lncRNA	chr3	57597531-57600927	+	ENSG00000272146.6
XLOC_051256	XLOC_051256	ARFGEF1-DT	620.292	chr8:67343833-67747114	TKS4_WT	TKS4_WT_T	26.468	190.647	2.84858	26.468	190.647	2.84858	0	1	0	1	lncRNA	chr8	67343975-67345087	+	ENSG00000271966.1
XLOC_030605	XLOC_030605	ARHGAP15-AS1	-54.4696	chr2:143070972-143768352	TKS4_WT	TKS4_WT_T	62.4884	28.4512	-1.1351	62.4884	28.4512	-1.1351	0	1	0	1	lncRNA	chr2	143629133-143656179	-	ENSG00000231758.3
XLOC_006430	XLOC_006430	ARHGAP22-IT1	-74.7323	chr10:48306672-48656265	TKS4_WT	TKS4_WT_T	444.782	112.386	-1.98463	444.782	112.386	-1.98464	-0.109662	0.4237	0.372942	0.999503	lncRNA	chr10	48510525-48511589	-	ENSG00000248682.1
XLOC_001045	XLOC_001045	ARHGAP29-AS1	82.0911	chr1:94168904-94336179	TKS4_WT	TKS4_WT_T	274.233	499.354	0.864662	274.233	499.354	0.864661	0.0224926	0.528	0.277366	0.999503	lncRNA	chr1	94247819-94411036	+	ENSG00000226835.4
XLOC_009629	XLOC_009629	ARHGAP42-AS1	-22.481	chr11:100684160-100993941	TKS4_WT	TKS4_WT_T	247.765	192.065	-0.367373	247.765	192.065	-0.367378	-0.0293073	0.8465	0.072373	0.999503	lncRNA	chr11	100684162-100687955	-	ENSG00000248027.1
XLOC_015221	XLOC_015221	ARHGAP5-AS1	-8.13366	chr14:32072587-32159728	TKS4_WT	TKS4_WT_T	1091.76	1002.96	-0.122381	1091.76	1002.96	-0.122392	-0.00981791	0.94555	0.0243155	0.999503	lncRNA	chr14	32074946-32076793	-	ENSG00000258655.2
XLOC_037267	XLOC_037267	ARHGEF26-AS1	-61.8972	chr3:154024400-154257827	TKS4_WT	TKS4_WT_T	141.893	54.0652	-1.39203	141.893	54.0652	-1.39203	-0.178931	0.5561	0.254847	0.999503	lncRNA	chr3	154024401-154121347	-	ENSG00000243069.9
XLOC_001579	XLOC_001579	ARHGEF2-AS2	250.023	chr1:155946838-155991262	TKS4_WT	TKS4_WT_T	249.953	874.894	1.80745	249.953	874.894	1.80745	0.324731	0.45865	0.338519	0.999503	lncRNA	chr1	155978799-155982986	+	ENSG00000273002.1
XLOC_049197	XLOC_049197	ARHGEF35-AS1	-99.8812	chr7:144186082-144380632	TKS4_WT	TKS4_WT_T	84.1803	0		84.1803	0.1	-9.71734		0.111	0.954677	0.999503	lncRNA,protein_coding,transcribed_unprocessed_pseudogene
XLOC_014035	XLOC_014035	ARHGEF7-AS1	12.9098	chr13:111113811-111305734	TKS4_WT	TKS4_WT_T	706.875	798.131	0.175171	706.875	798.131	0.17517	0.0199342	0.92405	0.0343045	0.999503	lncRNA,-
XLOC_036539	XLOC_036539	ARIH2OS	38.5943	chr3:48917787-48986382	TKS4_WT	TKS4_WT_T	771.951	1069.88	0.470863	771.951	1069.88	0.470868	0.0399131	0.78495	0.105158	0.999503	lncRNA	chr3	48917782-48918823	-	ENSG00000221883.4
XLOC_020182	XLOC_020182	ARLNC1	75.0978	chr16:80828734-80892596	TKS4_WT	TKS4_WT_T	363.189	635.936	0.80816	363.189	635.936	0.808161	0.510686	0.39405	0.404449	0.999503	lncRNA	chr16	80826074-80892682	-	ENSG00000260896.6
XLOC_055407	XLOC_055407	ARRDC1-AS1	5.62188	chr9:137605640-137618895	TKS4_WT	TKS4_WT_T	2810.98	2969.01	0.0789083	2810.98	2969.01	0.0789088	0.0295408	0.9272	0.0328266	0.999503	lncRNA	chr9	137615326-137618906	-	ENSG00000203993.7
XLOC_040883	XLOC_040883	ARRDC3-AS1	-20.5486	chr5:91368630-91420715	TKS4_WT	TKS4_WT_T	1597.24	1269.03	-0.331847	1597.24	1269.03	-0.331855	-0.0534357	0.8696	0.0606805	0.999503	lncRNA	chr5	91380349-91612566	+	ENSG00000281357.4
XLOC_055592	XLOC_055592	ARSD-AS1	-99.6799	chrX:2903971-2929345	TKS4_WT	TKS4_WT_T	31.2442	0		31.2442	0.1	-8.28744	0	1	0	1	lncRNA	chrX	2904904-2906081	+	ENSG00000229851.1
XLOC_052717	XLOC_052717	ASAP1-IT2	-37.6584	chr8:130052103-130443848	TKS4_WT	TKS4_WT_T	1031.46	643.029	-0.681728	1031.46	643.029	-0.681732	-0.0801197	0.71575	0.145239	0.999503	lncRNA	chr8	130082738-130084768	-	ENSG00000280543.1
XLOC_022345	XLOC_022345	ASB16-AS1	-17.8623	chr17:44170703-44186717	TKS4_WT	TKS4_WT_T	7092.63	5825.72	-0.283885	7092.63	5825.72	-0.283884	-0.23319	0.7421	0.129538	0.999503	lncRNA	chr17	44175968-44186723	-	ENSG00000267080.7
XLOC_001569	XLOC_001569	ASH1L-AS1	11.5953	chr1:155335262-155563944	TKS4_WT	TKS4_WT_T	719.015	802.387	0.158277	719.015	802.387	0.158276	0.0125921	0.90385	0.0439036	0.999503	lncRNA	chr1	155562026-155563944	+	ENSG00000235919.5
XLOC_055580	XLOC_055580	ASMTL-AS1	-25.1156	chrX:1400530-1453794	TKS4_WT	TKS4_WT_T	870.061	651.54	-0.417262	870.061	651.54	-0.417263	-0.081872	0.8468	0.0722192	0.999503	lncRNA	chrY	1401769-1414028	+	ENSG00000236017.8_PAR_Y
XLOC_014048	XLOC_014048	ATP11A-AS1	56802.4	chr13:112690033-112887168	TKS4_WT	TKS4_WT_T	0	56.9024		0.1	56.9024	9.15235	0	1	0	1	lncRNA	chr13	112745449-112754693	-	ENSG00000232684.1
XLOC_003650	XLOC_003650	ATP1A1-AS1	-31.3344	chr1:116372985-116418622	TKS4_WT	TKS4_WT_T	2096.74	1439.74	-0.542342	2096.74	1439.74	-0.54234	-0.0437323	0.73595	0.133152	0.999503	lncRNA	chr1	116378437-116421301	-	ENSG00000203865.12
XLOC_019739	XLOC_019739	ATP2A1-AS1	92.4196	chr16:28878487-28925238	TKS4_WT	TKS4_WT_T	1431.46	2754.41	0.944252	1431.46	2754.41	0.944256	0.378539	0.60475	0.218424	0.999503	lncRNA	chr16	28878957-28879938	-	ENSG00000260442.6
XLOC_010922	XLOC_010922	ATP2B1-AS1	120.505	chr12:89588048-89711952	TKS4_WT	TKS4_WT_T	959.416	2115.56	1.14081	959.416	2115.56	1.14081	0.134077	0.52535	0.279551	0.999503	lncRNA	chr12	89708959-89712590	+	ENSG00000271614.1
XLOC_020210	XLOC_020210	ATP2C2-AS1	-46.4874	chr16:84368522-84467361	TKS4_WT	TKS4_WT_T	3011.98	1611.79	-0.90205	3011.98	1611.79	-0.902048	-0.406537	0.65525	0.183593	0.999503	lncRNA	chr16	84459259-84467361	-	ENSG00000261286.1
XLOC_019117	XLOC_019117	ATP6V0D1-DT	-19.2705	chr16:67481318-67505977	TKS4_WT	TKS4_WT_T	548.067	442.452	-0.308832	548.067	442.452	-0.308831	-0.16387	0.6917	0.160082	0.999503	lncRNA	chr16	67481314-67505977	+	ENSG00000270049.4
XLOC_050496	XLOC_050496	ATP6V0E2-AS1	-20.2729	chr7:149867693-149880713	TKS4_WT	TKS4_WT_T	1812.96	1445.42	-0.326862	1812.96	1445.42	-0.326858	-0.0771649	0.88195	0.054556	0.999503	lncRNA	chr7	149867697-149880610	-	ENSG00000204934.10
XLOC_029991	XLOC_029991	ATP6V1B1-AS1	-15.1813	chr2:70935899-70965431	TKS4_WT	TKS4_WT_T	1120.41	950.317	-0.237549	1120.41	950.317	-0.237546	-0.176444	0.82675	0.0826258	0.999503	lncRNA	chr2	70941817-70948610	-	ENSG00000239322.1
XLOC_043112	XLOC_043112	ATXN1-AS1	-37.5781	chr6:16299111-16766883	TKS4_WT	TKS4_WT_T	2051.17	1280.38	-0.679873	2051.17	1280.38	-0.679875	-0.180764	0.7795	0.108184	0.999503	lncRNA	chr6	16761138-16763947	+	ENSG00000229931.2
XLOC_011122	XLOC_011122	ATXN2-AS	892.587	chr12:111452213-111600255	TKS4_WT	TKS4_WT_T	31.2442	310.126	3.31119	31.2442	310.126	3.31119	0.587575	0.37355	0.427651	0.999503	lncRNA	chr12	111599498-111600256	+	ENSG00000258099.1
XLOC_021166	XLOC_021166	ATXN7L3-AS1	35.503	chr17:44186971-44223703	TKS4_WT	TKS4_WT_T	182.689	247.549	0.438326	182.689	247.549	0.438324	0.0165085	0.83385	0.0789121	0.999503	lncRNA	chr17	44198537-44216565	+	ENSG00000267394.2
XLOC_030744	XLOC_030744	B3GALT1-AS1	126.475	chr2:167293000-167941144	TKS4_WT	TKS4_WT_T	84.1803	190.647	1.17935	84.1803	190.647	1.17935	0.146786	0.61815	0.208906	0.999503	lncRNA	chr2	167814757-167941180	-	ENSG00000235335.3
XLOC_033297	XLOC_033297	B3GALT5-AS1	-26.981	chr21:39597146-39612822	TKS4_WT	TKS4_WT_T	298.113	217.679	-0.453656	298.113	217.679	-0.453657	-0.217462	0.7391	0.131297	0.999503	lncRNA	chr21	39597147-39612910	-	ENSG00000184809.13
XLOC_053384	XLOC_053384	B4GALT1-AS1	62.0264	chr9:33104076-33179983	TKS4_WT	TKS4_WT_T	185.276	300.196	0.696225	185.276	300.196	0.696229	0.0853566	0.7733	0.111652	0.999503	lncRNA	chr9	33166948-33182865	+	ENSG00000233554.6
XLOC_052563	XLOC_052563	BAALC-AS1	-99.8933	chr8:103121031-103230305	TKS4_WT	TKS4_WT_T	93.7326	0		93.7326	0.1	-9.87241	0	1	0	1	lncRNA	chr8	103153394-103298772	-	ENSG00000247081.8
XLOC_052562	XLOC_052562	BAALC-AS2	28351.2	chr8:103121031-103230305	TKS4_WT	TKS4_WT_T	0	28.4512		0.1	28.4512	8.15235	0	1	0	1	lncRNA	chr8	103132963-103141520	-	ENSG00000236939.3
XLOC_008350	XLOC_008350	BACE1-AS	-28.3871	chr11:117232670-117316256	TKS4_WT	TKS4_WT_T	1474.05	1055.61	-0.481708	1474.05	1055.61	-0.481709	-0.11986	0.83975	0.07585	0.999503	lncRNA	chr11	117288453-117293578	+	ENSG00000278768.3
XLOC_032816	XLOC_032816	BACH1-IT2	-54.4697	chr21:29372500-29373980	TKS4_WT	TKS4_WT_T	437.419	199.158	-1.1351	437.419	199.158	-1.1351	-216.399	0.43025	0.366279	0.999503	lncRNA	chr21	29370497-29373709	+	ENSG00000228817.4
XLOC_022796	XLOC_022796	BAIAP2-DT	-52.1782	chr17:81029132-81034719	TKS4_WT	TKS4_WT_T	17715.1	8471.68	-1.06426	17715.1	8471.68	-1.06426	-0.956025	0.18345	0.736482	0.999503	lncRNA	chr17	81029130-81034881	-	ENSG00000226137.5
XLOC_004019	XLOC_004019	BCAN-AS1	-39.5996	chr1:156637781-156661409	TKS4_WT	TKS4_WT_T	65584.5	39613.3	-0.727372	65584.5	39613.3	-0.72737	-0.640467	0.35005	0.45587	0.999503	lncRNA	chr1	156637783-156641004	-	ENSG00000272068.1
XLOC_001040	XLOC_001040	BCAR3-AS1	-70.6554	chr1:93448066-93847219	TKS4_WT	TKS4_WT_T	281.198	82.5164	-1.76883	281.198	82.5164	-1.76883	-0.0905268	0.5511	0.25877	0.999503	lncRNA	chr1	93591972-93605573	+	ENSG00000224093.6
XLOC_019563	XLOC_019563	BCAR4	-99.9406	chr16:11819829-11828832	TKS4_WT	TKS4_WT_T	168.361	0		168.361	0.1	-10.7173		0.00075	3.12494	0.177253	lncRNA	chr16	11819829-11828845	-	ENSG00000262117.5
XLOC_010546	XLOC_010546	BCDIN3D-AS1	88.3697	chr12:49791138-49843106	TKS4_WT	TKS4_WT_T	497.718	937.55	0.913567	497.718	937.55	0.913567	0.147725	0.59295	0.226982	0.999503	lncRNA	chr12	49827913-49841143	+	ENSG00000258057.6
XLOC_031597	XLOC_031597	BCL2L1-AS1	82.1215	chr20:31664451-31723963	TKS4_WT	TKS4_WT_T	31.2442	56.9024	0.864901	31.2442	56.9024	0.864901	0	1	0	1	lncRNA	chr20	31686216-31716825	+	ENSG00000236559.1
XLOC_033610	XLOC_033610	BCRP3	-27.6054	chr22:24632914-24659147	TKS4_WT	TKS4_WT_T	312.442	226.191	-0.466047	312.442	226.191	-0.466047	-0.203282	0.5949	0.225556	0.999503	lncRNA	chr22	24632915-24650012	+	ENSG00000215481.9
XLOC_007431	XLOC_007431	BDNF-AS	85.8092	chr11:27506851-27722030	TKS4_WT	TKS4_WT_T	581.898	1081.22	0.893827	581.898	1081.22	0.893822	0.0905772	0.422	0.374688	0.999503	lncRNA	chr11	27506830-27698231	+	ENSG00000245573.9
XLOC_008680	XLOC_008680	BGLT3	-68.0167	chr11:5244553-5245546	TKS4_WT	TKS4_WT_T	266.869	85.3536	-1.64461	266.869	85.3536	-1.64461	-1.08877	0.2444	0.611899	0.999503	lncRNA	chr11	5244554-5245546	-	ENSG00000260629.2
XLOC_036209	XLOC_036209	BHLHE40-AS1	-32.8396	chr3:4896808-4985323	TKS4_WT	TKS4_WT_T	124.977	83.935	-0.574315	124.977	83.935	-0.574318	-0.0481559	0.7622	0.117931	0.999503	lncRNA	chr3	4896809-4980414	-	ENSG00000235831.7
XLOC_024611	XLOC_024611	BISPR	18.4743	chr19:17405685-17425332	TKS4_WT	TKS4_WT_T	29857.1	35373	0.244575	29857.1	35373	0.244575	0.256149	0.70305	0.153014	0.999503	lncRNA
XLOC_054618	XLOC_054618	BMS1P14	-17.1	chr9:40463757-40584212	TKS4_WT	TKS4_WT_T	605.779	502.191	-0.270555	605.779	502.191	-0.270555	-0.136793	0.87075	0.0601065	0.999503	lncRNA	chr9	40505399-40566281	-	ENSG00000276500.1
XLOC_031318	XLOC_031318	BOK-AS1	-46.8055	chr2:241544383-241583536	TKS4_WT	TKS4_WT_T	262.093	139.419	-0.910655	262.093	139.419	-0.910652	-0.0715979	0.6573	0.182236	0.999503	lncRNA	chr2	241544403-241558977	-	ENSG00000234235.1
XLOC_035750	XLOC_035750	BPESC1	34.3209	chr3:139104184-139125167	TKS4_WT	TKS4_WT_T	62.4884	83.935	0.425685	62.4884	83.935	0.425684	0.245426	0.47515	0.323169	0.999503	lncRNA	chr3	139104185-139125171	+	ENSG00000232416.3
XLOC_032921	XLOC_032921	BRWD1-AS2	282993	chr21:39184175-39323218	TKS4_WT	TKS4_WT_T	0	283.093		0.1	283.093	11.4671		0.07965	1.09881	0.999503	lncRNA	chr21	39313935-39314962	+	ENSG00000255568.3
XLOC_025481	XLOC_025481	BSG-AS1	-39.3142	chr19:567432-583493	TKS4_WT	TKS4_WT_T	1570.77	953.234	-0.720568	1570.77	953.234	-0.72057	-0.0466405	0.6218	0.206349	0.999503	lncRNA	chr19	562360-572228	-	ENSG00000267751.6
XLOC_036557	XLOC_036557	BSN-DT	-3.86123	chr3:49549305-49554366	TKS4_WT	TKS4_WT_T	57.7122	55.4838	-0.0568107	57.7122	55.4838	-0.0568097	-0.0195283	0.8041	0.0946899	0.999503	lncRNA	chr3	49549306-49554366	-	ENSG00000226913.2
XLOC_032758	XLOC_032758	BTG3-AS1	-16.0244	chr21:17512905-17636213	TKS4_WT	TKS4_WT_T	1129.97	948.899	-0.251952	1129.97	948.899	-0.251958	-0.026883	0.8976	0.0469172	0.999503	lncRNA	chr21	17611708-17633199	+	ENSG00000280594.2
XLOC_043967	XLOC_043967	BVES-AS1	-99.6799	chr6:105137686-105180014	TKS4_WT	TKS4_WT_T	31.2442	0		31.2442	0.1	-8.28744	0	1	0	1	lncRNA	chr6	105136308-105199559	+	ENSG00000203808.13
XLOC_030972	XLOC_030972	BZW1-AS1	-69.6464	chr2:200695722-200827338	TKS4_WT	TKS4_WT_T	93.7326	28.4512	-1.72006	93.7326	28.4512	-1.72006	0	1	0	1	lncRNA	chr2	200780495-200812170	-	ENSG00000230408.3
XLOC_006604	XLOC_006604	C10orf55	85.1608	chr10:73909181-73922777	TKS4_WT	TKS4_WT_T	391.846	725.545	0.888779	391.846	725.545	0.888778	0.101124	0.64995	0.18712	0.999503	lncRNA	chr10	73909969-73922777	-	ENSG00000222047.9
XLOC_005777	XLOC_005777	C10orf95-AS1	26.3207	chr10:102449816-102456293	TKS4_WT	TKS4_WT_T	12010.3	15171.5	0.33709	12010.3	15171.5	0.337092	0.311219	0.66925	0.174412	0.999503	lncRNA	chr10	102449816-102461106	+	ENSG00000269609.6
XLOC_010324	XLOC_010324	C12orf60,PLBD1-AS1	89.9806	chr12:14503660-14824415	TKS4_WT	TKS4_WT_T	3345.92	6356.6	0.925853	3345.92	6356.6	0.925852	0.197504	0.3613	0.442132	0.999503	protein_coding,lncRNA
XLOC_014680	XLOC_014680	C14orf178	63.9338	chr14:77717598-77769742	TKS4_WT	TKS4_WT_T	84.1803	138	0.713116	84.1803	138	0.713114	0.0286333	0.72895	0.137302	0.999503	lncRNA	chr14	77760834-77769742	+	ENSG00000197734.10
XLOC_019301	XLOC_019301	C16orf95-DT	113.555	chr16:87317508-87318043	TKS4_WT	TKS4_WT_T	216.521	462.391	1.09461	216.521	462.391	1.09461	0.545483	0.4751	0.323215	0.999503	lncRNA	chr16	87317491-87318043	+	ENSG00000270006.3
XLOC_001850	XLOC_001850	C1orf220	180.324	chr1:178542795-178548889	TKS4_WT	TKS4_WT_T	182.689	512.121	1.4871	182.689	512.121	1.48709	0.995568	0.3302	0.481223	0.999503	lncRNA	chr1	178542752-178548889	+	ENSG00000213057.5
XLOC_022780	XLOC_022780	C1QTNF1-AS1	28351.2	chr17:79019208-79049788	TKS4_WT	TKS4_WT_T	0	28.4512		0.1	28.4512	8.15235	0	1	0	1	lncRNA	chr17	79018131-79027673	-	ENSG00000265096.3
XLOC_010216	XLOC_010216	C1RL-AS1	-41.5305	chr12:7094553-7130272	TKS4_WT	TKS4_WT_T	5659.38	3309.01	-0.774245	5659.38	3309.01	-0.774244	-0.415266	0.56255	0.249839	0.999503	lncRNA	chr12	7108052-7122524	+	ENSG00000205885.8
XLOC_032850	XLOC_032850	C21orf62-AS1	233.889	chr21:32772099-32813808	TKS4_WT	TKS4_WT_T	93.7326	312.963	1.73937	93.7326	312.963	1.73937	0	1	0	1	lncRNA	chr21	32772100-32955437	+	ENSG00000205930.10
XLOC_033114	XLOC_033114	C21orf91,C21orf91-OT1	17.7718	chr21:17777403-18267371	TKS4_WT	TKS4_WT_T	26525.1	31239.1	0.235993	26525.1	31239.1	0.235995	0.241028	0.7277	0.138048	0.999503	protein_coding,lncRNA
XLOC_044912	XLOC_044912	C2-AS1	56802.4	chr6:31897782-31945672	TKS4_WT	TKS4_WT_T	0	56.9024		0.1	56.9024	9.15235	0	1	0	1	lncRNA	chr6	31934474-31941724	-	ENSG00000281756.1
XLOC_001476	XLOC_001476	C2CD4D-AS1	36.5911	chr1:151837817-151853712	TKS4_WT	TKS4_WT_T	62.4884	85.3536	0.449864	62.4884	85.3536	0.449864	0	1	0	1	lncRNA	chr1	151841877-151850385	+	ENSG00000234614.1
XLOC_028647	XLOC_028647	C2orf27A,CDRT15P4,NBEAP2	10.6773	chr2:131682498-131767404	TKS4_WT	TKS4_WT_T	23745.8	26281.2	0.146359	23745.8	26281.2	0.146359	0.142074	0.86415	0.0634109	0.999503	lncRNA,transcribed_unprocessed_pseudogene,transcribed_unprocessed_pseudogene
XLOC_030319	XLOC_030319	C2orf49-DT	13.7498	chr2:105331541-105438529	TKS4_WT	TKS4_WT_T	12784.9	14542.8	0.185872	12784.9	14542.8	0.185864	0.0757287	0.7289	0.137332	0.999503	lncRNA	chr2	105334027-105337475	-	ENSG00000272994.1
XLOC_035505	XLOC_035505	C3orf52,TBILA	-2.83425	chr3:112086348-112136379	TKS4_WT	TKS4_WT_T	42614.5	41406.7	-0.0414816	42614.5	41406.7	-0.0414802	-0.0441466	0.95145	0.021614	0.999503	protein_coding,lncRNA
XLOC_040593	XLOC_040593	C5orf34-AS1	131.976	chr5:43444251-43519854	TKS4_WT	TKS4_WT_T	120.201	278.838	1.21398	120.201	278.838	1.21398	0.113301	0.6355	0.196884	0.999503	lncRNA	chr5	43511058-43521811	+	ENSG00000248554.1
XLOC_040362	XLOC_040362	C5orf38	53965.2	chr5:2751892-2758578	TKS4_WT	TKS4_WT_T	0	54.0652		0.1	54.0652	9.07856	0	1	0	1	lncRNA	chr5	2752131-2755397	+	ENSG00000186493.14
XLOC_040666	XLOC_040666	C5orf64	28351.2	chr5:61637759-61730997	TKS4_WT	TKS4_WT_T	0	28.4512		0.1	28.4512	8.15235	0	1	0	1	lncRNA	chr5	61610424-61793401	+	ENSG00000178722.14
XLOC_041890	XLOC_041890	C5orf67	53965.2	chr5:56511281-56606256	TKS4_WT	TKS4_WT_T	0	54.0652		0.1	54.0652	9.07856	0	1	0	1	lncRNA	chr5	56511567-56606232	-	ENSG00000225940.7
XLOC_043658	XLOC_043658	C6orf223	-14.6577	chr6:43995722-44074652	TKS4_WT	TKS4_WT_T	11915.2	10168.7	-0.228671	11915.2	10168.7	-0.228668	-0.166516	0.8333	0.0791986	0.999503	lncRNA	chr6	44000580-44007612	+	ENSG00000181577.16
XLOC_051250	XLOC_051250	C8orf44,C8orf44-SGK3,SGK3	-25.5626	chr8:66667595-66862022	TKS4_WT	TKS4_WT_T	31556.3	23489.7	-0.425895	31556.3	23489.7	-0.4259	-0.454675	0.4963	0.304256	0.999503	lncRNA,protein_coding,protein_coding
XLOC_052104	XLOC_052104	C8orf86	2.13314	chr8:38510833-38528662	TKS4_WT	TKS4_WT_T	26.468	27.0326	0.0304486	26.468	27.0326	0.0304511	0	1	0	1	lncRNA	chr8	38510834-38560939	-	ENSG00000196166.5
XLOC_054237	XLOC_054237	C9orf163	33.9211	chr9:136440095-136486067	TKS4_WT	TKS4_WT_T	1457.53	1951.94	0.421382	1457.53	1951.94	0.421383	0.064597	0.86095	0.0650221	0.999503	lncRNA	chr9	136483495-136486067	+	ENSG00000196366.3
XLOC_052408	XLOC_052408	CA3-AS1	41.5368	chr8:85438858-85481493	TKS4_WT	TKS4_WT_T	79.4041	112.386	0.501178	79.4041	112.386	0.501177	0.0709863	0.79095	0.101851	0.999503	lncRNA	chr8	85440596-85464915	-	ENSG00000253549.6
XLOC_010138	XLOC_010138	CACNA1C-IT1	485.085	chr12:1941590-2697950	TKS4_WT	TKS4_WT_T	62.4884	365.61	2.54864	62.4884	365.61	2.54865	0.640134	0.3809	0.419189	0.999503	lncRNA	chr12	2018213-2020532	+	ENSG00000256837.1
XLOC_024323	XLOC_024323	CACTIN-AS1	8.19998	chr19:3594506-3626810	TKS4_WT	TKS4_WT_T	702.099	759.671	0.113699	702.099	759.671	0.1137	0.0182294	0.9533	0.0207704	0.999503	lncRNA	chr19	3607247-3613930	+	ENSG00000226800.5
XLOC_045830	XLOC_045830	CAHM	437.464	chr6:163413064-163413950	TKS4_WT	TKS4_WT_T	26.468	142.256	2.42617	26.468	142.256	2.42617	0	1	0	1	lncRNA	chr6	163413065-163413960	-	ENSG00000270419.1
XLOC_002594	XLOC_002594	CAMTA1-AS1	56802.4	chr1:6785451-7769706	TKS4_WT	TKS4_WT_T	0	56.9024		0.1	56.9024	9.15235	0	1	0	1	lncRNA	chr1	7441096-7441554	-	ENSG00000225126.1
XLOC_002590	XLOC_002590	CAMTA1-DT	273.545	chr1:6783891-6784980	TKS4_WT	TKS4_WT_T	52.9361	197.74	1.90128	52.9361	197.74	1.90128	1.2673	0.2121	0.673459	0.999503	lncRNA	chr1	6783892-6784843	-	ENSG00000237436.1
XLOC_020575	XLOC_020575	CAMTA2-AS1	40.6758	chr17:4967992-5053398	TKS4_WT	TKS4_WT_T	719.015	1011.48	0.492368	719.015	1011.48	0.492374	0.0387446	0.78165	0.106988	0.999503	lncRNA	chr17	4986466-4987324	+	ENSG00000262678.1
XLOC_031304	XLOC_031304	CAPN10-DT	17.7432	chr2:240582749-240586316	TKS4_WT	TKS4_WT_T	2635.26	3102.84	0.235643	2635.26	3102.84	0.235644	0.199126	0.76465	0.116537	0.999503	lncRNA	chr2	240582700-240586699	-	ENSG00000260942.1
XLOC_025120	XLOC_025120	CARD8-AS1	96.5113	chr19:48203147-48258194	TKS4_WT	TKS4_WT_T	923.794	1815.36	0.974613	923.794	1815.36	0.974613	0.295383	0.71745	0.144208	0.999503	lncRNA	chr19	48255675-48258199	+	ENSG00000268001.1
XLOC_016999	XLOC_016999	CARMAL	-99.9453	chr15:89041027-89082880	TKS4_WT	TKS4_WT_T	182.689	0		182.689	0.1	-10.8352		0.01475	1.83121	0.999503	lncRNA	chr15	89041223-89082819	+	ENSG00000260123.2
XLOC_053675	XLOC_053675	CARNMT1-AS1	56802.4	chr9:74952964-75028456	TKS4_WT	TKS4_WT_T	0	56.9024		0.1	56.9024	9.15235	0	1	0	1	lncRNA	chr9	74952968-74996293	+	ENSG00000203321.2
XLOC_007190	XLOC_007190	CARS1-AS1	56802.4	chr11:3000928-3057423	TKS4_WT	TKS4_WT_T	0	56.9024		0.1	56.9024	9.15235	0	1	0	1	lncRNA	chr11	3029009-3041260	+	ENSG00000247473.2
XLOC_052703	XLOC_052703	CASC11	-35.7745	chr8:127700607-127733967	TKS4_WT	TKS4_WT_T	84.1803	54.0652	-0.638782	84.1803	54.0652	-0.638782	-0.354599	0.67515	0.1706	0.999503	lncRNA	chr8	127686343-127738987	-	ENSG00000249375.8
XLOC_043147	XLOC_043147	CASC15	56802.4	chr6:21666412-22195820	TKS4_WT	TKS4_WT_T	0	56.9024		0.1	56.9024	9.15235	0	1	0	1	lncRNA	chr6	21664184-22654455	+	ENSG00000272168.9
XLOC_011067	XLOC_011067	CASC18	211.759	chr12:105704202-105767003	TKS4_WT	TKS4_WT_T	26.468	82.5164	1.64043	26.468	82.5164	1.64043	0.651367	0.323	0.490797	0.999503	lncRNA	chr12	105704203-105744062	+	ENSG00000257859.2
XLOC_005898	XLOC_005898	CASC2	-39.5526	chr10:118004915-118210153	TKS4_WT	TKS4_WT_T	2636.06	1593.43	-0.72625	2636.06	1593.43	-0.726248	-0.165278	0.6156	0.210701	0.999503	lncRNA	chr10	118046279-118210158	+	ENSG00000177640.16
XLOC_008751	XLOC_008751	CASC23	-99.8111	chr11:8011277-8016509	TKS4_WT	TKS4_WT_T	52.9361	0		52.9361	0.1	-9.04811	0	1	0	1	lncRNA	chr11	8011278-8016520	-	ENSG00000255420.2
XLOC_052701	XLOC_052701	CASC8	-23.3605	chr8:127244636-127482139	TKS4_WT	TKS4_WT_T	853.942	654.457	-0.383841	853.942	654.457	-0.38384	-0.220202	0.72405	0.140231	0.999503	lncRNA	chr8	127289808-127482139	-	ENSG00000246228.7
XLOC_052342	XLOC_052342	CASC9	-55.4071	chr8:75223116-75278889	TKS4_WT	TKS4_WT_T	1103.9	492.261	-1.16511	1103.9	492.261	-1.16511	-0.627285	0.32125	0.493157	0.999503	lncRNA	chr8	75120409-75352327	-	ENSG00000249395.4
XLOC_031104	XLOC_031104	CATIP-AS1	38.4772	chr2:218270484-218368393	TKS4_WT	TKS4_WT_T	120.201	166.451	0.469657	120.201	166.451	0.469649	0.0187238	0.8146	0.0890556	0.999503	lncRNA	chr2	218366665-218367835	-	ENSG00000225062.1
XLOC_007833	XLOC_007833	CATSPERZ,KCNK4,KCNK4-TEX40	191.562	chr11:64291301-64304770	TKS4_WT	TKS4_WT_T	466.474	1360.06	1.5438	466.474	1360.06	1.5438	0.966503	0.1079	0.966979	0.999503	protein_coding,protein_coding,lncRNA
XLOC_028993	XLOC_028993	CAVIN2-AS1	302933	chr2:191948299-192194933	TKS4_WT	TKS4_WT_T	0	303.033		0.1	303.033	11.5653		5e-05	4.30103	0.0217956	lncRNA	chr2	191846534-192044525	+	ENSG00000233766.8
XLOC_033264	XLOC_033264	CBR3-AS1	-86.1443	chr21:36130471-36156308	TKS4_WT	TKS4_WT_T	605.779	83.935	-2.85145	605.779	83.935	-2.85145	-1.9452	0.1443	0.840734	0.999503	lncRNA	chr21	36131767-36175815	-	ENSG00000236830.8
XLOC_051617	XLOC_051617	CCAT2	89.8195	chr8:127244636-127482139	TKS4_WT	TKS4_WT_T	57.7122	109.549	0.924627	57.7122	109.549	0.924628	0.185128	0.72635	0.138854	0.999503	lncRNA	chr8	127400399-127402150	+	ENSG00000280997.1
XLOC_020829	XLOC_020829	CCDC144NL-AS1	-66.9521	chr17:20863394-20930041	TKS4_WT	TKS4_WT_T	430.454	142.256	-1.59737	430.454	142.256	-1.59737	-1.25891	0.2058	0.686555	0.999503	lncRNA	chr17	20868433-21002276	+	ENSG00000233098.10
XLOC_009886	XLOC_009886	CCDC15-DT	-35.8319	chr11:124950382-124954058	TKS4_WT	TKS4_WT_T	423.489	271.745	-0.640072	423.489	271.745	-0.640071	-0.450764	0.67325	0.171824	0.999503	lncRNA	chr11	124949205-124954044	-	ENSG00000285825.2
XLOC_053863	XLOC_053863	CCDC180,STRA6LP,SUGT1P4,SUGT1P4-STRA6LP,SUGT1P4-STRA6LP-CCDC180	-15.4919	chr9:97155892-97378751	TKS4_WT	TKS4_WT_T	22613.8	19110.5	-0.242843	22613.8	19110.5	-0.242838	-0.246778	0.8031	0.0952304	0.999503	protein_coding,transcribed_unitary_pseudogene,unprocessed_pseudogene,lncRNA,lncRNA
XLOC_055377	XLOC_055377	CCDC183-AS1	104.22	chr9:136796337-136841187	TKS4_WT	TKS4_WT_T	896.529	1830.89	1.03012	896.529	1830.89	1.03012	0.152721	0.6863	0.163486	0.999503	lncRNA	chr9	136803927-136808848	-	ENSG00000228544.1
XLOC_003458	XLOC_003458	CCDC18-AS1	-6.26685	chr1:93310108-93345811	TKS4_WT	TKS4_WT_T	7227.56	6774.62	-0.0933692	7227.56	6774.62	-0.0933687	-0.0835421	0.91085	0.0405531	0.999503	lncRNA	chr1	93262186-93346025	-	ENSG00000223745.8
XLOC_052709	XLOC_052709	CCDC26	-13.4796	chr8:129351693-129680239	TKS4_WT	TKS4_WT_T	31.2442	27.0326	-0.208887	31.2442	27.0326	-0.208888	0	1	0	1	lncRNA	chr8	128634199-129683770	-	ENSG00000229140.11
XLOC_045680	XLOC_045680	CCDC28A-AS1	69.4444	chr6:138725214-138773703	TKS4_WT	TKS4_WT_T	1329.97	2253.56	0.760811	1329.97	2253.56	0.760812	0.576136	0.4374	0.359121	0.999503	lncRNA	chr6	138725211-138773652	-	ENSG00000279968.3
XLOC_030559	XLOC_030559	CCNT2-AS1	-35.5827	chr2:134838318-134918606	TKS4_WT	TKS4_WT_T	812.747	523.55	-0.634481	812.747	523.55	-0.634479	-0.432189	0.54145	0.266442	0.999503	lncRNA	chr2	134735464-134918710	-	ENSG00000224043.8
XLOC_017514	XLOC_017514	CCPG1,DNAAF4,DNAAF4-CCPG1	35.1942	chr15:55317183-55508234	TKS4_WT	TKS4_WT_T	11611.3	15697.8	0.435034	11611.3	15697.8	0.435033	0.319919	0.6802	0.167363	0.999503	protein_coding,protein_coding,lncRNA
XLOC_011412	XLOC_011412	CD27-AS1	-74.5926	chr12:6438474-6472006	TKS4_WT	TKS4_WT_T	985.485	250.386	-1.97668	985.485	250.386	-1.97668	-0.447951	0.4449	0.351738	0.999503	lncRNA	chr12	6439001-6451568	-	ENSG00000215039.8
XLOC_018799	XLOC_018799	CD2BP2-DT	196.598	chr16:30355370-30370494	TKS4_WT	TKS4_WT_T	336.721	998.708	1.56851	336.721	998.708	1.56851	0.175831	0.4001	0.397831	0.999503	lncRNA	chr16	30354665-30357116	+	ENSG00000260219.3
XLOC_008604	XLOC_008604	CD81-AS1	7.49282	chr11:2328748-2397402	TKS4_WT	TKS4_WT_T	26.468	28.4512	0.104237	26.468	28.4512	0.10424	0	1	0	1	lncRNA	chr11	2328749-2377992	-	ENSG00000238184.1
XLOC_054324	XLOC_054324	CDC37L1-DT	1039.54	chr9:4676599-4679480	TKS4_WT	TKS4_WT_T	26.468	301.614	3.51038	26.468	301.614	3.51038	2.72693	0.3969	0.401319	0.999503	lncRNA	chr9	4676600-4679502	-	ENSG00000273061.2
XLOC_002780	XLOC_002780	CDC42-AS1	-99.8933	chr1:22023993-22101360	TKS4_WT	TKS4_WT_T	93.7326	0		93.7326	0.1	-9.87241	0	1	0	1	lncRNA	chr1	22028317-22052927	-	ENSG00000285752.1
XLOC_053567	XLOC_053567	CDK2AP2P2,PTGER4P2,PTGER4P2-CDK2AP2P2	-34.6211	chr9:62838444-62847206	TKS4_WT	TKS4_WT_T	298.113	194.903	-0.613108	298.113	194.903	-0.613103	-0.298364	0.6577	0.181972	0.999503	processed_pseudogene,transcribed_processed_pseudogene,lncRNA
XLOC_048712	XLOC_048712	CDK6-AS1	-35.6006	chr7:92604920-92917187	TKS4_WT	TKS4_WT_T	676.03	435.359	-0.634881	676.03	435.359	-0.634882	-0.0205185	0.71815	0.143785	0.999503	lncRNA	chr7	92836367-92917188	+	ENSG00000237819.6
XLOC_053337	XLOC_053337	CDKN2B-AS1	-3.24166	chr9:21967138-22121097	TKS4_WT	TKS4_WT_T	930.759	900.587	-0.0475417	930.759	900.587	-0.047542	-0.009444	0.96425	0.0158104	0.999503	lncRNA	chr9	21994139-22128103	+	ENSG00000240498.9
XLOC_026232	XLOC_026232	CEACAM16-AS1	-68.0167	chr19:44612576-44725208	TKS4_WT	TKS4_WT_T	177.913	56.9024	-1.64461	177.913	56.9024	-1.64461	-0.116189	0.518	0.28567	0.999503	lncRNA	chr19	44631573-44725217	-	ENSG00000266903.2
XLOC_024805	XLOC_024805	CEBPA-DT	112.742	chr19:33302820-33305057	TKS4_WT	TKS4_WT_T	1368.18	2910.69	1.08911	1368.18	2910.69	1.0891	0.747878	0.3155	0.501001	0.999503	lncRNA	chr19	33302857-33305054	+	ENSG00000267296.2
XLOC_032502	XLOC_032502	CEBPB-AS1	4.28751	chr20:50184602-50192690	TKS4_WT	TKS4_WT_T	2992.88	3121.2	0.0605681	2992.88	3121.2	0.0605664	0.0132156	0.9773	0.0099721	0.999503	lncRNA	chr20	50184598-50191498	-	ENSG00000277449.1
XLOC_033969	XLOC_033969	CECR3	-99.6799	chr22:17256858-17266733	TKS4_WT	TKS4_WT_T	31.2442	0		31.2442	0.1	-8.28744	0	1	0	1	lncRNA	chr22	17256859-17266733	-	ENSG00000241832.1
XLOC_006140	XLOC_006140	CELF2-AS1	56802.4	chr10:10462514-11344674	TKS4_WT	TKS4_WT_T	0	56.9024		0.1	56.9024	9.15235	0	1	0	1	lncRNA	chr10	11316833-11319884	-	ENSG00000181800.6
XLOC_009794	XLOC_009794	CENATAC-DT	-16.8113	chr11:118996653-118998030	TKS4_WT	TKS4_WT_T	781.503	650.122	-0.265542	781.503	650.122	-0.265541	-0.154188	0.83405	0.0788079	0.999503	lncRNA	chr11	118994824-118998004	-	ENSG00000255121.2
XLOC_020184	XLOC_020184	CENPN-AS1	514.722	chr16:81007213-81047350	TKS4_WT	TKS4_WT_T	31.2442	192.065	2.61994	31.2442	192.065	2.61993	0.093782	0.2922	0.53432	0.999503	lncRNA	chr16	81016792-81035759	-	ENSG00000260213.6
XLOC_032335	XLOC_032335	CEP250-AS1	-99.8267	chr20:35455136-35519280	TKS4_WT	TKS4_WT_T	57.7122	0		57.7122	0.1	-9.17273		0.106	0.974694	0.999503	lncRNA	chr20	35476203-35490985	-	ENSG00000230155.7
XLOC_010965	XLOC_010965	CEP83-DT	597.749	chr12:94148576-94462570	TKS4_WT	TKS4_WT_T	182.689	1274.71	2.80271	182.689	1274.71	2.80271	0.267828	0.3029	0.518701	0.999503	lncRNA	chr12	94460003-94462484	+	ENSG00000278916.1
XLOC_016665	XLOC_016665	CERNA1	-7.09107	chr15:52115099-52304528	TKS4_WT	TKS4_WT_T	240.401	223.354	-0.106114	240.401	223.354	-0.106111	-0.00635477	0.9393	0.0271957	0.999503	lncRNA	chr15	52179999-52206915	+	ENSG00000259577.2
XLOC_051177	XLOC_051177	CERNA3	-99.6222	chr8:56074591-56075274	TKS4_WT	TKS4_WT_T	26.468	0		26.468	0.1	-8.04811	0	1	0	1	lncRNA	chr8	56074592-56075274	+	ENSG00000253603.1
XLOC_019391	XLOC_019391	CEROX1,LMF1	-35.3114	chr16:853633-981613	TKS4_WT	TKS4_WT_T	9155.15	5922.34	-0.628415	9155.15	5922.34	-0.628416	-0.522616	0.47745	0.321072	0.999503	lncRNA,protein_coding
XLOC_030751	XLOC_030751	CERS6-AS1	86.4147	chr2:168422616-168786429	TKS4_WT	TKS4_WT_T	1284.4	2394.31	0.898523	1284.4	2394.31	0.898515	0.0847967	0.61835	0.208766	0.999503	lncRNA	chr2	168771951-168786961	-	ENSG00000227617.9
XLOC_035227	XLOC_035227	CFAP20DC-AS1	-99.6222	chr3:58716416-59050045	TKS4_WT	TKS4_WT_T	26.468	0		26.468	0.1	-8.04811	0	1	0	1	lncRNA	chr3	58824437-59019093	+	ENSG00000242428.6
XLOC_006887	XLOC_006887	CFAP58-DT	-8.93924	chr10:104351300-104353575	TKS4_WT	TKS4_WT_T	124.977	113.805	-0.135099	124.977	113.805	-0.135099	0	1	0	1	lncRNA	chr10	104351301-104353624	-	ENSG00000231233.2
XLOC_032176	XLOC_032176	CFAP61-AS1	-66.839	chr20:20034360-20360714	TKS4_WT	TKS4_WT_T	338.91	112.386	-1.59244	338.91	112.386	-1.59244	-0.105475	0.6095	0.215026	0.999503	lncRNA	chr20	20258407-20267809	-	ENSG00000243810.1
XLOC_013271	XLOC_013271	CFL1P8,LINC01039	-46.2716	chr13:99577111-99585995	TKS4_WT	TKS4_WT_T	156.221	83.935	-0.896244	156.221	83.935	-0.896244	-0.528042	0.73115	0.135994	0.999503	processed_pseudogene,lncRNA
XLOC_030982	XLOC_030982	CFLAR-AS1	53965.2	chr2:201116163-201176687	TKS4_WT	TKS4_WT_T	0	54.0652		0.1	54.0652	9.07856	0	1	0	1	lncRNA	chr2	201140278-201157823	-	ENSG00000226312.7
XLOC_057695	XLOC_057695	CH17-340M24.3	-10.2588	chrX:154424379-154428479	TKS4_WT	TKS4_WT_T	279.009	250.386	-0.156155	279.009	250.386	-0.156158	-0.0719108	0.92125	0.0356225	0.999503	lncRNA	chrX	154424378-154428512	-	ENSG00000197180.3
XLOC_033034	XLOC_033034	CH507-42P11.6	-99.6799	chr21:6084363-6095783	TKS4_WT	TKS4_WT_T	31.2442	0		31.2442	0.1	-8.28744		0.11935	0.923178	0.999503	lncRNA	chr21	6084364-6091407	-	ENSG00000280179.1
XLOC_017056	XLOC_017056	CHASERR	15.6092	chr15:92882842-92898747	TKS4_WT	TKS4_WT_T	23875.6	27602.4	0.209259	23875.6	27602.4	0.209257	0.213966	0.75665	0.121105	0.999503	lncRNA	chr15	92819540-92899701	+	ENSG00000272888.8
XLOC_033922	XLOC_033922	CHKB-DT	-38.2713	chr22:50583025-50595281	TKS4_WT	TKS4_WT_T	1101.71	680.071	-0.695984	1101.71	680.071	-0.695987	-0.467706	0.5846	0.233141	0.999503	lncRNA	chr22	50583026-50595634	+	ENSG00000205559.5
XLOC_049558	XLOC_049558	CHN2-AS1	-99.6222	chr7:28979966-29563796	TKS4_WT	TKS4_WT_T	26.468	0		26.468	0.1	-8.04811	0	1	0	1	lncRNA	chr7	29199540-29208970	-	ENSG00000235669.1
XLOC_028920	XLOC_028920	CHROMR	-13.1549	chr2:178413658-178516463	TKS4_WT	TKS4_WT_T	6465.96	5615.37	-0.203483	6465.96	5615.37	-0.203483	-0.0562252	0.85225	0.069433	0.999503	lncRNA	chr2	178413635-178440243	+	ENSG00000223960.8
XLOC_025498	XLOC_025498	CIRBP-AS1	-0.85932	chr19:1267470-1274880	TKS4_WT	TKS4_WT_T	1000.21	991.615	-0.012454	1000.21	991.615	-0.0124509	-0.00172454	0.9879	0.00528701	0.999503	lncRNA	chr19	1267471-1270260	-	ENSG00000267493.4
XLOC_042083	XLOC_042083	CKMT2-AS1	-31.2228	chr5:81233321-81301569	TKS4_WT	TKS4_WT_T	4128.81	2839.68	-0.539997	4128.81	2839.68	-0.539998	-0.459262	0.5164	0.287014	0.999503	lncRNA	chr5	81201341-81301565	-	ENSG00000247572.9
XLOC_028552	XLOC_028552	CLASP1-AS1	326.129	chr2:121337775-121649462	TKS4_WT	TKS4_WT_T	141.893	604.647	2.0913	141.893	604.647	2.09129	0.119257	0.30315	0.518342	0.999503	lncRNA	chr2	121530422-121532705	+	ENSG00000265451.1
XLOC_003395	XLOC_003395	CLCA4-AS1	-99.9271	chr1:86547077-86704493	TKS4_WT	TKS4_WT_T	137.116	0		137.116	0.1	-10.4212		0.1428	0.845272	0.999503	lncRNA	chr1	86571181-86696311	-	ENSG00000236915.2
XLOC_011488	XLOC_011488	CLEC12A-AS1	-99.6222	chr12:9948136-10001894	TKS4_WT	TKS4_WT_T	26.468	0		26.468	0.1	-8.04811		0.06245	1.20447	0.999503	lncRNA	chr12	9948137-9953336	-	ENSG00000231560.1
XLOC_037164	XLOC_037164	CLSTN2-AS1	28351.2	chr3:139935184-140577397	TKS4_WT	TKS4_WT_T	0	28.4512		0.1	28.4512	8.15235	0	1	0	1	lncRNA	chr3	140505611-140508789	-	ENSG00000250433.1
XLOC_029475	XLOC_029475	CMPK2,NRIR	15.3055	chr2:6828553-6898239	TKS4_WT	TKS4_WT_T	906.878	1045.68	0.205461	906.878	1045.68	0.205461	0.131631	0.8544	0.0683388	0.999503	protein_coding,lncRNA
XLOC_004674	XLOC_004674	CNIH3-AS1	56802.4	chr1:224385145-224740554	TKS4_WT	TKS4_WT_T	0	56.9024		0.1	56.9024	9.15235	0	1	0	1	lncRNA	chr1	224717504-224730662	-	ENSG00000229400.1
XLOC_001052	XLOC_001052	CNN3-DT	-28.7732	chr1:94896956-94963270	TKS4_WT	TKS4_WT_T	271.645	193.484	-0.48951	271.645	193.484	-0.489508	-0.0210019	0.7996	0.0971272	0.999503	lncRNA	chr1	94927361-94963616	+	ENSG00000235501.7
XLOC_030246	XLOC_030246	CNNM3-DT	-82.0845	chr2:96812238-96813657	TKS4_WT	TKS4_WT_T	158.808	28.4512	-2.48073	158.808	28.4512	-2.48072	-153.391	0.3217	0.492549	0.999503	lncRNA	chr2	96812239-96813657	-	ENSG00000273265.1
XLOC_004797	XLOC_004797	COA6-AS1	55.286	chr1:234372806-234385080	TKS4_WT	TKS4_WT_T	830.062	1288.97	0.634933	830.062	1288.97	0.634928	0.113402	0.71855	0.143543	0.999503	lncRNA	chr1	234372807-234373662	-	ENSG00000231663.2
XLOC_033393	XLOC_033393	COL18A1-AS1	195.79	chr21:45403805-45563140	TKS4_WT	TKS4_WT_T	57.7122	170.707	1.56457	57.7122	170.707	1.56457	0	1	0	1	lncRNA	chr21	45419716-45425070	-	ENSG00000183535.9
XLOC_050240	XLOC_050240	COMETT	-19.3804	chr7:116563593-116798386	TKS4_WT	TKS4_WT_T	105.872	85.3536	-0.3108	105.872	85.3536	-0.310797	0	1	0	1	lncRNA	chr7	116563594-116663829	-	ENSG00000231210.3
XLOC_049045	XLOC_049045	COPG2IT1	15.8203	chr7:130486174-130687432	TKS4_WT	TKS4_WT_T	1517.04	1757.04	0.211892	1517.04	1757.04	0.211888	0.034564	0.91945	0.0364719	0.999503	lncRNA	chr7	130538954-130546900	+	ENSG00000286214.1
XLOC_022420	XLOC_022420	COPZ2,NFE2L1-DT	155.857	chr17:48026166-48048086	TKS4_WT	TKS4_WT_T	199.605	510.703	1.35534	199.605	510.703	1.35534	0.651505	0.47355	0.324634	0.999503	protein_coding,lncRNA
XLOC_019636	XLOC_019636	COQ7-DT	-2.27569	chr16:18983933-19080095	TKS4_WT	TKS4_WT_T	110.648	108.13	-0.0332093	110.648	108.13	-0.0332105	-0.00344559	0.94245	0.0257417	0.999503	lncRNA	chr16	19062144-19067691	-	ENSG00000261465.7
XLOC_019767	XLOC_019767	CORO1A-AS1	-58.5005	chr16:30183392-30189254	TKS4_WT	TKS4_WT_T	137.116	56.9024	-1.26884	137.116	56.9024	-1.26884	-0.34302	0.64025	0.19365	0.999503	lncRNA	chr16	30183505-30184957	-	ENSG00000261416.1
XLOC_023947	XLOC_023947	COSMOC	-75.4576	chr18:36129898-36187435	TKS4_WT	TKS4_WT_T	226.073	55.4838	-2.02665	226.073	55.4838	-2.02665	-0.0633224	0.3704	0.431329	0.999503	lncRNA	chr18	36179996-36187459	-	ENSG00000260552.2
XLOC_012974	XLOC_012974	CPB2-AS1	114.08	chr13:46052847-46105033	TKS4_WT	TKS4_WT_T	560.207	1199.29	1.09814	560.207	1199.29	1.09815	0.744728	0.3282	0.483861	0.999503	lncRNA	chr13	46052497-46161379	+	ENSG00000235903.10
XLOC_010458	XLOC_010458	CPNE8-AS1	-13.104	chr12:38652199-38909592	TKS4_WT	TKS4_WT_T	569.759	495.098	-0.202636	569.759	495.098	-0.202638	-0.0359482	0.92745	0.0327095	0.999503	lncRNA	chr12	38906451-38909592	+	ENSG00000257718.1
XLOC_029144	XLOC_029144	CPS1-IT1	-55.7787	chr2:210477684-210679107	TKS4_WT	TKS4_WT_T	505.082	223.354	-1.17719	505.082	223.354	-1.17719	-0.106526	0.5476	0.261537	0.999503	lncRNA	chr2	210617571-210619876	+	ENSG00000280837.1
XLOC_033702	XLOC_033702	CPSF1P1,SLC5A4-AS1	-24.3241	chr22:32205114-32371264	TKS4_WT	TKS4_WT_T	15084.2	11415.1	-0.402095	15084.2	11415.1	-0.402095	-0.334886	0.6467	0.189297	0.999503	transcribed_processed_pseudogene,lncRNA
XLOC_029700	XLOC_029700	CRIM1-DT	99.9635	chr2:36354748-36355570	TKS4_WT	TKS4_WT_T	771.951	1543.62	0.999733	771.951	1543.62	0.999736	0.693205	0.3635	0.439496	0.999503	lncRNA	chr2	36354749-36355114	-	ENSG00000260025.1
XLOC_019948	XLOC_019948	CRNDE	37.2345	chr16:54918862-54928886	TKS4_WT	TKS4_WT_T	3290.39	4515.55	0.45664	3290.39	4515.55	0.456643	0.378297	0.60525	0.218065	0.999503	lncRNA	chr16	54845189-54929189	-	ENSG00000245694.11
XLOC_017911	XLOC_017911	CRTC3-AS1	-99.6222	chr15:90529914-90717140	TKS4_WT	TKS4_WT_T	26.468	0		26.468	0.1	-8.04811	0	1	0	1	lncRNA	chr15	90620007-90717141	-	ENSG00000259736.1
XLOC_004284	XLOC_004284	CRYZL2P,CRYZL2P-SEC16B,SEC16B	-23.0326	chr1:177928787-178038007	TKS4_WT	TKS4_WT_T	3652.39	2811.15	-0.377678	3652.39	2811.15	-0.37768	-0.32581	0.6471	0.189029	0.999503	transcribed_unitary_pseudogene,lncRNA,protein_coding
XLOC_025517	XLOC_025517	CSNK1G2-AS1	-99.84	chr19:1941148-1981338	TKS4_WT	TKS4_WT_T	62.4884	0		62.4884	0.1	-9.28744	0	1	0	1	lncRNA	chr19	1952531-1954586	-	ENSG00000180846.8
XLOC_007396	XLOC_007396	CSRP3-AS1	-49.9111	chr11:19182029-19312856	TKS4_WT	TKS4_WT_T	218.709	109.549	-0.997438	218.709	109.549	-0.997436	-0.0873785	0.704	0.152427	0.999503	lncRNA	chr11	19196775-19281426	+	ENSG00000255308.1
XLOC_007465	XLOC_007465	CSTF3-DT	90.8197	chr11:33161656-33191598	TKS4_WT	TKS4_WT_T	396.622	756.833	0.932211	396.622	756.833	0.93221	0.535313	0.44755	0.349158	0.999503	lncRNA	chr11	33161657-33191598	+	ENSG00000247151.7
XLOC_055034	XLOC_055034	CT70	56802.4	chr9:104970425-104991865	TKS4_WT	TKS4_WT_T	0	56.9024		0.1	56.9024	9.15235	0	1	0	1	lncRNA	chr9	104970593-104991818	-	ENSG00000230013.2
XLOC_042652	XLOC_042652	CTB-178M22.2	337.144	chr5:166979065-168264159	TKS4_WT	TKS4_WT_T	31.2442	136.582	2.1281	31.2442	136.582	2.12811	1.09683	0.40725	0.390139	0.999503	lncRNA	chr5	168229583-168269415	-	ENSG00000253978.2
XLOC_037824	XLOC_037824	CTBP1-AS	15.3114	chr4:1210119-1253007	TKS4_WT	TKS4_WT_T	613.143	707.024	0.205536	613.143	707.024	0.205536	0.0147458	0.91835	0.0369918	0.999503	lncRNA	chr4	1210120-1218591	+	ENSG00000280927.1
XLOC_037825	XLOC_037825	CTBP1-DT	2.82745	chr4:1210119-1253007	TKS4_WT	TKS4_WT_T	8725.89	8972.61	0.0402257	8725.89	8972.61	0.0402254	0.010696	0.97645	0.01035	0.999503	lncRNA	chr4	1249300-1288291	+	ENSG00000196810.5
XLOC_041555	XLOC_041555	CTC-338M12.4	-3.4098	chr5:181246540-181272307	TKS4_WT	TKS4_WT_T	1916.24	1850.9	-0.0500511	1916.24	1850.9	-0.0500513	-0.0164683	0.93305	0.0300951	0.999503	lncRNA	chr5	181246493-181272167	+	ENSG00000233937.8
XLOC_040357	XLOC_040357	CTD-2194D22.4	-46.2537	chr5:1887330-1900493	TKS4_WT	TKS4_WT_T	52.9361	28.4512	-0.895763	52.9361	28.4512	-0.895762	0	1	0	1	lncRNA	chr5	1887332-1900493	+	ENSG00000249326.1
XLOC_041583	XLOC_041583	CTD-3080P12.3	85253.6	chr5:1173095-1178605	TKS4_WT	TKS4_WT_T	0	85.3536		0.1	85.3536	9.73731	0	1	0	1	lncRNA	chr5	1173141-1178605	-	ENSG00000249201.2
XLOC_035141	XLOC_035141	CYB561D2	20.3344	chr3:50350861-50504244	TKS4_WT	TKS4_WT_T	12615.1	15180.3	0.267044	12615.1	15180.3	0.267049	0.142797	0.8941	0.0486139	0.999503	lncRNA	chr3	50365334-50368197	+	ENSG00000271858.5
XLOC_039701	XLOC_039701	CYP2U1-AS1	82.1215	chr4:107823644-107989722	TKS4_WT	TKS4_WT_T	31.2442	56.9024	0.864901	31.2442	56.9024	0.864901	0	1	0	1	lncRNA	chr4	107863473-107989692	-	ENSG00000245293.4
XLOC_053394	XLOC_053394	CYP4F26P	-56.0585	chr9:33580694-33605293	TKS4_WT	TKS4_WT_T	1026.28	450.963	-1.18635	1026.28	450.963	-1.18634	-0.605482	0.4276	0.368962	0.999503	lncRNA	chr9	33580695-33607874	+	ENSG00000226562.4
XLOC_048707	XLOC_048707	CYP51A1-AS1	-8.01908	chr7:91940861-92180725	TKS4_WT	TKS4_WT_T	216.521	199.158	-0.120588	216.521	199.158	-0.120594	-0.00485626	0.9157	0.0382468	0.999503	lncRNA	chr7	92134604-92180725	+	ENSG00000188693.8
XLOC_028255	XLOC_028255	CYTOR	-35.056	chr2:87439522-87521518	TKS4_WT	TKS4_WT_T	18938	12299.1	-0.622728	18938	12299.1	-0.622731	-0.555808	0.44385	0.352764	0.999503	lncRNA	chr2	87454781-87636740	+	ENSG00000222041.12
XLOC_045032	XLOC_045032	DAAM2-AS1	56802.4	chr6:39792365-39934462	TKS4_WT	TKS4_WT_T	0	56.9024		0.1	56.9024	9.15235	0	1	0	1	lncRNA	chr6	39881804-39900071	-	ENSG00000235033.7
XLOC_025082	XLOC_025082	DACT3-AS1	110868	chr19:46647550-46719412	TKS4_WT	TKS4_WT_T	0	110.968		0.1	110.968	10.1159		0.1569	0.804377	0.999503	lncRNA	chr19	46660364-46678991	+	ENSG00000245598.7
XLOC_038172	XLOC_038172	DANCR	-2.91138	chr4:52712393-52720697	TKS4_WT	TKS4_WT_T	81215.9	78851.4	-0.0426253	81215.9	78851.4	-0.0426258	-0.0423199	0.95285	0.0209755	0.999503	lncRNA	chr4	52712325-52723623	+	ENSG00000226950.8
XLOC_056346	XLOC_056346	DANT1	-99.84	chrX:115840395-115969111	TKS4_WT	TKS4_WT_T	62.4884	0		62.4884	0.1	-9.28744	0	1	0	1	lncRNA	chrX	115840899-115908066	+	ENSG00000229335.2
XLOC_057376	XLOC_057376	DANT2	-4.36625	chrX:115840395-115969111	TKS4_WT	TKS4_WT_T	6277.7	6003.6	-0.0644078	6277.7	6003.6	-0.0644082	-0.0563007	0.93515	0.0291187	0.999503	lncRNA	chrX	115694880-115969146	-	ENSG00000235244.5
XLOC_028680	XLOC_028680	DARS1-AS1	2.13295	chr2:135905880-136007542	TKS4_WT	TKS4_WT_T	52.9361	54.0652	0.0304486	52.9361	54.0652	0.0304484	0	1	0	1	lncRNA	chr2	135985124-136022593	+	ENSG00000231890.9
XLOC_055320	XLOC_055320	DBH-AS1	-53.8822	chr9:133636362-133659329	TKS4_WT	TKS4_WT_T	370.154	170.707	-1.1166	370.154	170.707	-1.1166	-0.837232	0.4966	0.303993	0.999503	lncRNA	chr9	133654586-133657313	-	ENSG00000225756.1
XLOC_003977	XLOC_003977	DCST1-AS1	-32.4793	chr1:155033805-155069553	TKS4_WT	TKS4_WT_T	1548.68	1045.68	-0.566595	1548.68	1045.68	-0.566598	-0.0650884	0.72245	0.141192	0.999503	lncRNA	chr1	155045191-155046118	-	ENSG00000232093.1
XLOC_028150	XLOC_028150	DCTN1-AS1	428.204	chr2:74361153-74398668	TKS4_WT	TKS4_WT_T	31.2442	165.033	2.40109	31.2442	165.033	2.40109	0.187183	0.405	0.392545	0.999503	lncRNA	chr2	74385474-74393882	+	ENSG00000237737.6
XLOC_021626	XLOC_021626	DCXR-DT	-2.27569	chr17:82037917-82039380	TKS4_WT	TKS4_WT_T	110.648	108.13	-0.0332093	110.648	108.13	-0.0332105	-0.0199723	0.80585	0.0937458	0.999503	lncRNA	chr17	82037872-82039380	+	ENSG00000264569.2
XLOC_048385	XLOC_048385	DDC-AS1	28351.2	chr7:50458435-50565460	TKS4_WT	TKS4_WT_T	0	28.4512		0.1	28.4512	8.15235	0	1	0	1	lncRNA	chr7	50531759-50543463	+	ENSG00000226122.1
XLOC_010528	XLOC_010528	DDN-AS1	-42.9779	chr12:48995148-49060884	TKS4_WT	TKS4_WT_T	6374.41	3634.82	-0.81041	6374.41	3634.82	-0.810408	-0.11508	0.59275	0.227128	0.999503	lncRNA	chr12	48998367-49019241	+	ENSG00000257913.3
XLOC_002764	XLOC_002764	DDOST,PINK1-AS	11.741	chr1:20633457-20661369	TKS4_WT	TKS4_WT_T	217691	243250	0.160163	217691	243250	0.160158	0.151652	0.82755	0.0822058	0.999503	protein_coding,lncRNA
XLOC_011671	XLOC_011671	DDX11-AS1	-39.5373	chr12:31020762-31073847	TKS4_WT	TKS4_WT_T	1548.28	936.132	-0.725883	1548.28	936.132	-0.725883	-0.521415	0.48005	0.318714	0.999503	lncRNA	chr12	31019434-31073847	-	ENSG00000245614.5
XLOC_020097	XLOC_020097	DDX19A-DT	-61.1923	chr16:70289766-70346747	TKS4_WT	TKS4_WT_T	1209.77	469.484	-1.36558	1209.77	469.484	-1.36558	-0.248916	0.54325	0.265	0.999503	lncRNA	chr16	70315442-70346806	-	ENSG00000261777.6
XLOC_043446	XLOC_043446	DDX39B-AS1	141.576	chr6:31528961-31546848	TKS4_WT	TKS4_WT_T	57.7122	139.419	1.27248	57.7122	139.419	1.27248	0.0275328	0.5738	0.241239	0.999503	lncRNA	chr6	31542304-31543138	+	ENSG00000234006.1
XLOC_001994	XLOC_001994	DDX59-AS1	299.898	chr1:200640804-200694250	TKS4_WT	TKS4_WT_T	264.68	1058.45	1.99963	264.68	1058.45	1.99963	0.890721	0.58485	0.232956	0.999503	lncRNA	chr1	200669507-200694250	+	ENSG00000260088.1
XLOC_035212	XLOC_035212	DENND6A-DT	159.561	chr3:57693204-57696651	TKS4_WT	TKS4_WT_T	31.2442	81.0978	1.37608	31.2442	81.0978	1.37607	0	1	0	1	lncRNA	chr3	57693205-57696596	+	ENSG00000241933.1
XLOC_000864	XLOC_000864	DEPDC1-AS1	-6.73592	chr1:68474151-68538627	TKS4_WT	TKS4_WT_T	437.817	408.326	-0.100606	437.817	408.326	-0.100607	-0.00584958	0.95095	0.0218423	0.999503	lncRNA	chr1	68496676-68538627	+	ENSG00000234264.1
XLOC_033999	XLOC_033999	DGCR11	296.221	chr22:19036281-19122454	TKS4_WT	TKS4_WT_T	2921.63	11576.1	1.9863	2921.63	11576.1	1.9863	0.581033	0.4545	0.342466	0.999503	lncRNA	chr22	19046162-19048375	-	ENSG00000273311.1
XLOC_030021	XLOC_030021	DGUOK-AS1	0.894214	chr2:73926826-73981439	TKS4_WT	TKS4_WT_T	1513.06	1526.59	0.0128499	1513.06	1526.59	0.0128434	0.00192239	0.98905	0.00478175	0.999503	lncRNA	chr2	73947322-73982164	-	ENSG00000237883.3
XLOC_000769	XLOC_000769	DHCR24-DT	-7.63489	chr1:54887523-54890272	TKS4_WT	TKS4_WT_T	899.515	830.838	-0.11458	899.515	830.838	-0.11458	-0.0804748	0.9151	0.0385314	0.999503	lncRNA	chr1	54887563-54888850	+	ENSG00000233203.6
XLOC_002843	XLOC_002843	DHDDS-AS1	-46.2536	chr1:26432320-26471306	TKS4_WT	TKS4_WT_T	105.872	56.9024	-0.895763	105.872	56.9024	-0.89576	0	1	0	1	lncRNA	chr1	26462756-26468014	-	ENSG00000225891.2
XLOC_015159	XLOC_015159	DHRS4-AS1	-3.079	chr14:23938730-23969279	TKS4_WT	TKS4_WT_T	15001.6	14539.7	-0.0451139	15001.6	14539.7	-0.0451189	-0.0359795	0.96505	0.0154502	0.999503	lncRNA	chr14	23938219-24052555	-	ENSG00000215256.5
XLOC_022547	XLOC_022547	DHX40P1,RNFT1,TBC1D3P1,TBC1D3P1-DHX40P1	26.7316	chr17:59952239-60019052	TKS4_WT	TKS4_WT_T	17567.6	22263.7	0.341773	17567.6	22263.7	0.341776	0.345602	0.61545	0.210807	0.999503	transcribed_unprocessed_pseudogene,protein_coding,transcribed_unprocessed_pseudogene,lncRNA
XLOC_041207	XLOC_041207	DIAPH1-AS1	109449	chr5:141515015-141619055	TKS4_WT	TKS4_WT_T	0	109.549		0.1	109.549	10.0974		0.087	1.06048	0.999503	lncRNA	chr5	141558311-141565263	+	ENSG00000246422.2
XLOC_057251	XLOC_057251	DIAPH2-AS1	-42.3197	chrX:96684841-97604997	TKS4_WT	TKS4_WT_T	93.7326	54.0652	-0.79385	93.7326	54.0652	-0.793851	0	1	0	1	lncRNA	chrX	97431286-97642589	-	ENSG00000236256.9
XLOC_014782	XLOC_014782	DICER1-AS1	18.3307	chr14:95086227-95179933	TKS4_WT	TKS4_WT_T	115.424	136.582	0.242814	115.424	136.582	0.242824	0.00806629	0.88465	0.0532285	0.999503	lncRNA	chr14	95157645-95181475	+	ENSG00000235706.9
XLOC_015756	XLOC_015756	DIO3OS,MIR1247	123.112	chr14:101552220-101560422	TKS4_WT	TKS4_WT_T	62.4884	139.419	1.15777	62.4884	139.419	1.15777	0	1	0	1	lncRNA,miRNA
XLOC_004958	XLOC_004958	DIP2C-AS1	-88.6174	chr10:274200-689710	TKS4_WT	TKS4_WT_T	249.953	28.4512	-3.1351	249.953	28.4512	-3.1351	0	1	0	1	lncRNA	chr10	649948-669581	+	ENSG00000180525.14
XLOC_031092	XLOC_031092	DIRC3	73.582	chr2:217282732-217756593	TKS4_WT	TKS4_WT_T	110.648	192.065	0.795616	110.648	192.065	0.795617	0.348484	0.6641	0.177767	0.999503	lncRNA	chr2	217284019-217756593	-	ENSG00000231672.8
XLOC_017629	XLOC_017629	DIS3L-AS1	-8.93926	chr15:66278501-66333898	TKS4_WT	TKS4_WT_T	31.2442	28.4512	-0.135099	31.2442	28.4512	-0.135099	0	1	0	1	lncRNA	chr15	66278498-66293357	-	ENSG00000261318.1
XLOC_055356	XLOC_055356	DKFZP434A062	-18.9259	chr9:136322301-136327323	TKS4_WT	TKS4_WT_T	240.401	194.903	-0.302691	240.401	194.903	-0.302687	-0.138016	0.85485	0.0681101	0.999503	lncRNA	chr9	136322303-136327323	-	ENSG00000262075.3
XLOC_013008	XLOC_013008	DLEU1	-8.06528	chr13:49982548-50528643	TKS4_WT	TKS4_WT_T	18050.2	16594.4	-0.12132	18050.2	16594.4	-0.121318	-0.0584132	0.9536	0.0206338	0.999503	lncRNA	chr13	50082169-50906856	+	ENSG00000176124.15
XLOC_013693	XLOC_013693	DLEU2,MIR15A,MIR16-1	-49.1957	chr13:49982548-50528643	TKS4_WT	TKS4_WT_T	18191.5	9242.07	-0.976976	18191.5	9242.07	-0.976977	-0.373668	0.42505	0.37156	0.999503	lncRNA,miRNA,miRNA
XLOC_000828	XLOC_000828	DLEU2L	-93.682	chr1:63440769-63585401	TKS4_WT	TKS4_WT_T	427.866	27.0326	-3.98439	427.866	27.0326	-3.98439	-0.759608	0.4039	0.393726	0.999503	lncRNA	chr1	63547082-63550636	+	ENSG00000116652.6
XLOC_036168	XLOC_036168	DLG1-AS1	12.2034	chr3:197042559-197303751	TKS4_WT	TKS4_WT_T	324.581	364.191	0.166115	324.581	364.191	0.166117	0.0106606	0.93095	0.0310736	0.999503	lncRNA	chr3	197298252-197303755	+	ENSG00000227375.6
XLOC_008115	XLOC_008115	DLG2-AS2	-8.93926	chr11:83455008-85628535	TKS4_WT	TKS4_WT_T	31.2442	28.4512	-0.135099	31.2442	28.4512	-0.135099	0	1	0	1	lncRNA	chr11	83643602-83725390	+	ENSG00000255311.5
XLOC_005541	XLOC_005541	DLG5-AS1	84.615	chr10:77926811-77929825	TKS4_WT	TKS4_WT_T	440.006	812.317	0.88452	440.006	812.317	0.88452	0.582573	0.3978	0.400335	0.999503	lncRNA	chr10	77927372-77929824	+	ENSG00000233871.2
XLOC_023256	XLOC_023256	DLGAP1-AS1	47.2348	chr18:3496031-4455441	TKS4_WT	TKS4_WT_T	3988.71	5872.77	0.558119	3988.71	5872.77	0.558119	0.288955	0.7387	0.131532	0.999503	lncRNA	chr18	3593732-3598363	+	ENSG00000177337.9
XLOC_023257	XLOC_023257	DLGAP1-AS2	-15.0488	chr18:3496031-4455441	TKS4_WT	TKS4_WT_T	2955.86	2511.04	-0.235296	2955.86	2511.04	-0.235293	-0.0988377	0.8348	0.0784176	0.999503	lncRNA	chr18	3603000-3610103	+	ENSG00000262001.2
XLOC_032350	XLOC_032350	DLGAP4-AS1	-28.3382	chr20:36306338-36573275	TKS4_WT	TKS4_WT_T	79.4041	56.9024	-0.480725	79.4041	56.9024	-0.480724	0	1	0	1	lncRNA	chr20	36507702-36573391	-	ENSG00000232907.9
XLOC_025069	XLOC_025069	DM1-AS	-99.84	chr19:45764784-45782490	TKS4_WT	TKS4_WT_T	62.4884	0		62.4884	0.1	-9.28744	0	1	0	1	lncRNA	chr19	45767796-45772504	+	ENSG00000267395.5
XLOC_025356	XLOC_025356	DNAAF3-AS1	-68.0167	chr19:55158660-55166722	TKS4_WT	TKS4_WT_T	88.9564	28.4512	-1.64461	88.9564	28.4512	-1.64461	-0.167263	0.56115	0.250921	0.999503	lncRNA	chr19	55158939-55177540	+	ENSG00000267577.1
XLOC_021579	XLOC_021579	DNAH17-AS1	-23.7354	chr17:78378622-78577436	TKS4_WT	TKS4_WT_T	699.512	533.48	-0.390915	699.512	533.48	-0.390915	-0.0443123	0.8563	0.0673741	0.999503	lncRNA	chr17	78484882-78503056	+	ENSG00000267432.6
XLOC_054538	XLOC_054538	DNAJB5-DT	-99.8933	chr9:34985409-34989379	TKS4_WT	TKS4_WT_T	93.7326	0		93.7326	0.1	-9.87241	0	1	0	1	lncRNA	chr9	34985410-34989379	-	ENSG00000281491.1
XLOC_035660	XLOC_035660	DNAJB8-AS1	-99.936	chr3:128462433-128472317	TKS4_WT	TKS4_WT_T	156.221	0		156.221	0.1	-10.6094	0	1	0	1	lncRNA	chr3	128463594-128472317	+	ENSG00000242049.1
XLOC_012945	XLOC_012945	DNAJC15,LINC00400	21.2407	chr13:43023585-43159466	TKS4_WT	TKS4_WT_T	26586.2	32233.3	0.27787	26586.2	32233.3	0.277874	0.236417	0.7457	0.127436	0.999503	protein_coding,lncRNA
XLOC_027765	XLOC_027765	DNAJC27-AS1	320.237	chr2:24972111-25039694	TKS4_WT	TKS4_WT_T	432.642	1818.12	2.0712	432.642	1818.12	2.0712	1.24572	0.11565	0.936854	0.999503	lncRNA	chr2	24971390-25039716	+	ENSG00000224165.7
XLOC_013922	XLOC_013922	DNAJC3-DT	-41.7819	chr13:95672834-95676925	TKS4_WT	TKS4_WT_T	1199.82	698.512	-0.780457	1199.82	698.512	-0.780461	-0.543232	0.45175	0.345102	0.999503	lncRNA	chr13	95648711-95676973	-	ENSG00000247400.5
XLOC_005504	XLOC_005504	DNAJC9-AS1	0.337956	chr10:73247366-73361064	TKS4_WT	TKS4_WT_T	1260.52	1264.78	0.00487105	1260.52	1264.78	0.00486745	0.000468786	0.9885	0.00502333	0.999503	lncRNA	chr10	73247360-73276984	+	ENSG00000236756.4
XLOC_017754	XLOC_017754	DNM1P35	-60.489	chr15:75722895-75740077	TKS4_WT	TKS4_WT_T	860.509	339.996	-1.33967	860.509	339.996	-1.33967	-0.669471	0.37045	0.43127	0.999503	lncRNA	chr15	75727670-75738629	-	ENSG00000246877.2
XLOC_001814	XLOC_001814	DNM3-IT1	-99.6799	chr1:171841494-172468829	TKS4_WT	TKS4_WT_T	31.2442	0		31.2442	0.1	-8.28744	0	1	0	1	lncRNA	chr1	171864187-171864687	+	ENSG00000233540.1
XLOC_005740	XLOC_005740	DNMBP-AS1	112.741	chr10:99875570-100009948	TKS4_WT	TKS4_WT_T	399.209	849.28	1.08909	399.209	849.28	1.0891	0.0704026	0.6021	0.220331	0.999503	lncRNA	chr10	99927010-99959050	+	ENSG00000227695.6
XLOC_013263	XLOC_013263	DOCK9-DT	-19.7949	chr13:99086722-99088625	TKS4_WT	TKS4_WT_T	283.785	227.61	-0.318237	283.785	227.61	-0.318234	-0.258714	0.8048	0.094312	0.999503	lncRNA	chr13	99087819-99088625	+	ENSG00000260992.1
XLOC_016487	XLOC_016487	DPH6-DT	-6.31929	chr15:35546194-35859001	TKS4_WT	TKS4_WT_T	57.7122	54.0652	-0.0941767	57.7122	54.0652	-0.0941761	-0.0467102	0.4852	0.314079	0.999503	lncRNA	chr15	35546154-35860199	+	ENSG00000248079.3
XLOC_028812	XLOC_028812	DPP4-DT	-8.93926	chr2:162074856-162077932	TKS4_WT	TKS4_WT_T	62.4884	56.9024	-0.135099	62.4884	56.9024	-0.135099	0	1	0	1	lncRNA	chr2	162073256-162078036	+	ENSG00000230918.3
XLOC_024344	XLOC_024344	DPP9-AS1	144.613	chr19:4675225-4725174	TKS4_WT	TKS4_WT_T	194.829	476.577	1.2905	194.829	476.577	1.2905	0.102031	0.55295	0.257314	0.999503	lncRNA	chr19	4679282-4685948	+	ENSG00000205790.1
XLOC_025990	XLOC_025990	DPY19L3-DT	-9.4539	chr19:32390049-32405539	TKS4_WT	TKS4_WT_T	824.887	746.903	-0.143275	824.887	746.903	-0.143276	-0.0994634	0.89245	0.0494161	0.999503	lncRNA	chr19	32390050-32405560	-	ENSG00000267213.4
XLOC_016797	XLOC_016797	DRAIC	-68.0167	chr15:69561719-69571440	TKS4_WT	TKS4_WT_T	88.9564	28.4512	-1.64461	88.9564	28.4512	-1.64461	-0.889048	0.45215	0.344717	0.999503	lncRNA	chr15	69462921-69843120	+	ENSG00000245750.10
XLOC_032901	XLOC_032901	DSCR9	-42.8455	chr21:37208502-37221736	TKS4_WT	TKS4_WT_T	283.785	162.196	-0.807064	283.785	162.196	-0.80706	-0.65611	0.5454	0.263285	0.999503	lncRNA	chr21	37208503-37221736	+	ENSG00000230366.9
XLOC_023917	XLOC_023917	DSG2-AS1	28351.2	chr18:31498176-31556911	TKS4_WT	TKS4_WT_T	0	28.4512		0.1	28.4512	8.15235	0	1	0	1	lncRNA	chr18	31542146-31556948	-	ENSG00000264859.6
XLOC_043751	XLOC_043751	DST-AS1	-8.93926	chr6:56457995-56954830	TKS4_WT	TKS4_WT_T	31.2442	28.4512	-0.135099	31.2442	28.4512	-0.135099	0	1	0	1	lncRNA	chr6	56843928-56864078	+	ENSG00000231441.2
XLOC_048640	XLOC_048640	DTX2P1,DTX2P1-UPK3BP1-PMS2P11,PMS2P11,UPK3BP1	-48.0572	chr7:76959767-77032361	TKS4_WT	TKS4_WT_T	25095.3	13035.2	-0.945	25095.3	13035.2	-0.945004	-0.81807	0.2768	0.557834	0.999503	transcribed_unprocessed_pseudogene,lncRNA,transcribed_unprocessed_pseudogene,transcribed_unprocessed_pseudogene
XLOC_035476	XLOC_035476	DUBR	21.1552	chr3:107240691-107326964	TKS4_WT	TKS4_WT_T	3841.05	4653.63	0.276855	3841.05	4653.63	0.276856	0.239951	0.72885	0.137362	0.999503	lncRNA	chr3	107220744-107348464	+	ENSG00000243701.8
XLOC_006909	XLOC_006909	DUSP5-DT	160.583	chr10:110474340-110495066	TKS4_WT	TKS4_WT_T	387.07	1008.64	1.38174	387.07	1008.64	1.38174	0.772053	0.29355	0.532318	0.999503	lncRNA	chr10	110428840-110496590	-	ENSG00000273143.2
XLOC_015045	XLOC_015045	DUXAP10,LINC01297,LINC01297-DUXAP10-NBEAP6,NBEAP6	-43.7748	chr14:19245663-19384288	TKS4_WT	TKS4_WT_T	675.631	379.875	-0.830711	675.631	379.875	-0.830711	-0.45928	0.3765	0.424235	0.999503	transcribed_processed_pseudogene,lncRNA,-,transcribed_unprocessed_pseudogene
XLOC_022518	XLOC_022518	DYNLL2-DT	1.39379	chr17:58076890-58083204	TKS4_WT	TKS4_WT_T	84.1803	85.3536	0.0199693	84.1803	85.3536	0.0199694	0.0112357	0.5052	0.296537	0.999503	lncRNA	chr17	58076891-58083204	-	ENSG00000266290.1
XLOC_004515	XLOC_004515	DYRK3-AS1	472.859	chr1:206634195-206655175	TKS4_WT	TKS4_WT_T	120.201	688.582	2.51819	120.201	688.582	2.51818	0.224471	0.30815	0.511238	0.999503	lncRNA	chr1	206634184-206635714	-	ENSG00000237605.3
XLOC_053461	XLOC_053461	EBLN3P	7.96845	chr9:37079895-37090401	TKS4_WT	TKS4_WT_T	61624.3	66534.8	0.110608	61624.3	66534.8	0.11061	0.116304	0.86585	0.0625573	0.999503	lncRNA	chr9	37079645-37090928	+	ENSG00000281649.3
XLOC_000304	XLOC_000304	ECE1-AS1	28351.2	chr1:21217249-21345504	TKS4_WT	TKS4_WT_T	0	28.4512		0.1	28.4512	8.15235	0	1	0	1	lncRNA	chr1	21293290-21299874	+	ENSG00000231105.2
XLOC_043003	XLOC_043003	ECI2-DT	-86.3972	chr6:4136071-4157385	TKS4_WT	TKS4_WT_T	209.157	28.4512	-2.87803	209.157	28.4512	-2.87802	-1.89277	0.21315	0.671315	0.999503	lncRNA	chr6	4136072-4157385	+	ENSG00000234817.2
XLOC_007014	XLOC_007014	EDRF1-DT	29.147	chr10:125683242-125719493	TKS4_WT	TKS4_WT_T	341.497	441.033	0.369013	341.497	441.033	0.369014	0.175733	0.80035	0.0967201	0.999503	lncRNA	chr10	125700436-125719566	-	ENSG00000224023.10
XLOC_022410	XLOC_022410	EFCAB13-DT	-56.7398	chr17:47253826-47323901	TKS4_WT	TKS4_WT_T	62.4884	27.0326	-1.20889	62.4884	27.0326	-1.20889	0	1	0	1	lncRNA	chr17	47303460-47323613	-	ENSG00000263293.2
XLOC_041781	XLOC_041781	EGFLAM-AS1	53965.2	chr5:38258558-38465480	TKS4_WT	TKS4_WT_T	0	54.0652		0.1	54.0652	9.07856	0	1	0	1	lncRNA	chr5	38425036-38427376	-	ENSG00000249491.1
XLOC_049732	XLOC_049732	EGFR-AS1	-73.4018	chr7:54992960-55211628	TKS4_WT	TKS4_WT_T	213.933	56.9024	-1.9106	213.933	56.9024	-1.9106	-0.110259	0.50935	0.292984	0.999503	lncRNA	chr7	55179750-55188934	-	ENSG00000224057.1
XLOC_014314	XLOC_014314	EGLN3-AS1	108030	chr14:33985023-34203705	TKS4_WT	TKS4_WT_T	0	108.13		0.1	108.13	10.0786	0	1	0	1	lncRNA	chr14	34040097-34059300	+	ENSG00000258897.1
XLOC_036208	XLOC_036208	EGOT	26932.6	chr3:4493347-4847840	TKS4_WT	TKS4_WT_T	0	27.0326		0.1	27.0326	8.07856	0	1	0	1	lncRNA	chr3	4749192-4751590	-	ENSG00000235947.1
XLOC_036429	XLOC_036429	EIF1B-AS1	-64.1691	chr3:39808913-40309698	TKS4_WT	TKS4_WT_T	79.4041	28.4512	-1.48073	79.4041	28.4512	-1.48072	0	1	0	1	lncRNA	chr3	40061110-40309698	-	ENSG00000280739.4
XLOC_028270	XLOC_028270	EIF2AK3-DT	44.3888	chr2:88627828-88631825	TKS4_WT	TKS4_WT_T	502.494	725.545	0.529958	502.494	725.545	0.529959	0.352361	0.61355	0.21215	0.999503	lncRNA	chr2	88627539-88631821	+	ENSG00000234028.4
XLOC_037469	XLOC_037469	EIF2B5-DT	-74.7142	chr3:184073422-184145311	TKS4_WT	TKS4_WT_T	663.89	167.87	-1.9836	663.89	167.87	-1.9836	-0.141342	0.2871	0.541967	0.999503	lncRNA	chr3	184134019-184135238	-	ENSG00000272721.5
XLOC_017430	XLOC_017430	EIF3J-DT	-42.7648	chr15:44534504-44536923	TKS4_WT	TKS4_WT_T	3256.16	1863.67	-0.805025	3256.16	1863.67	-0.805025	-0.645816	0.38715	0.412121	0.999503	lncRNA	chr15	44527257-44537046	-	ENSG00000179523.6
XLOC_003140	XLOC_003140	ELAVL4-AS1	80997.8	chr1:50048054-50203772	TKS4_WT	TKS4_WT_T	0	81.0978		0.1	81.0978	9.66352	0	1	0	1	lncRNA	chr1	50174306-50175868	-	ENSG00000237337.1
XLOC_004434	XLOC_004434	ELF3-AS1	-25.3085	chr1:201982647-202010353	TKS4_WT	TKS4_WT_T	880.012	657.294	-0.420984	880.012	657.294	-0.420984	-0.0489174	0.83705	0.0772486	0.999503	lncRNA	chr1	201995696-202010463	-	ENSG00000234678.2
XLOC_049362	XLOC_049362	ELFN1-AS1	-27.9482	chr7:1666074-1747954	TKS4_WT	TKS4_WT_T	3905.73	2814.15	-0.472892	3905.73	2814.15	-0.472893	-0.241486	0.7327	0.135074	0.999503	lncRNA	chr7	1738630-1742291	-	ENSG00000236081.1
XLOC_049923	XLOC_049923	ELN-AS1	-99.84	chr7:74027771-74069907	TKS4_WT	TKS4_WT_T	62.4884	0		62.4884	0.1	-9.28744	0	1	0	1	lncRNA	chr7	74059576-74062284	-	ENSG00000232415.1
XLOC_002799	XLOC_002799	ELOA-AS1	-8.58951	chr1:23743365-23778297	TKS4_WT	TKS4_WT_T	1551.66	1418.38	-0.129569	1551.66	1418.38	-0.129568	-0.0188398	0.9458	0.0242007	0.999503	lncRNA	chr1	23706901-23778325	-	ENSG00000236810.7
XLOC_043065	XLOC_043065	ELOVL2-AS1	-8.93926	chr6:10980758-11079144	TKS4_WT	TKS4_WT_T	31.2442	28.4512	-0.135099	31.2442	28.4512	-0.135099	0	1	0	1	lncRNA	chr6	11043482-11079154	+	ENSG00000230314.7
XLOC_000277	XLOC_000277	EMC1-AS1	-63.138	chr1:19074507-19251524	TKS4_WT	TKS4_WT_T	146.669	54.0652	-1.43979	146.669	54.0652	-1.43979	0	1	0	1	lncRNA	chr1	19210355-19240704	+	ENSG00000230424.2
XLOC_025064	XLOC_025064	EML2-AS1	-10.24	chr19:45609395-45645629	TKS4_WT	TKS4_WT_T	1241.01	1113.93	-0.155857	1241.01	1113.93	-0.155856	-0.0373261	0.93465	0.029351	0.999503	lncRNA	chr19	45641494-45642840	+	ENSG00000267757.4
XLOC_029843	XLOC_029843	EML6-AS1	82.1215	chr2:54723466-55137831	TKS4_WT	TKS4_WT_T	31.2442	56.9024	0.864901	31.2442	56.9024	0.864901	0	1	0	1	lncRNA	chr2	54747103-54750473	-	ENSG00000231334.2
XLOC_048828	XLOC_048828	EMSLR	2.87243	chr7:101308306-101321823	TKS4_WT	TKS4_WT_T	9282.72	9549.36	0.0408572	9282.72	9549.36	0.0408564	0.0229898	0.97545	0.010795	0.999503	lncRNA	chr7	101308270-101314800	+	ENSG00000232445.2
XLOC_006954	XLOC_006954	EMX2OS	28351.2	chr10:117484292-117549546	TKS4_WT	TKS4_WT_T	0	28.4512		0.1	28.4512	8.15235	0	1	0	1	lncRNA	chr10	117473215-117545068	-	ENSG00000229847.9
XLOC_000131	XLOC_000131	ENO1-AS1	-39.2801	chr1:8878834-8879885	TKS4_WT	TKS4_WT_T	269.457	163.614	-0.719755	269.457	163.614	-0.719759	-0.349793	0.65085	0.186519	0.999503	lncRNA	chr1	8878835-8879894	+	ENSG00000230679.1
XLOC_006780	XLOC_006780	ENTPD1-AS1	57.6313	chr10:95710900-96090235	TKS4_WT	TKS4_WT_T	293.337	462.391	0.656554	293.337	462.391	0.656554	0.0756073	0.70915	0.149262	0.999503	lncRNA	chr10	95732976-96090250	-	ENSG00000226688.8
XLOC_036432	XLOC_036432	ENTPD3-AS1	-66.2021	chr3:40387181-40453308	TKS4_WT	TKS4_WT_T	84.1803	28.4512	-1.56499	84.1803	28.4512	-1.56499	-0.854573	0.3892	0.409827	0.999503	lncRNA	chr3	40313802-40453329	-	ENSG00000223797.7
XLOC_034330	XLOC_034330	EP300-AS1	-7.24114	chr22:41185213-41197501	TKS4_WT	TKS4_WT_T	2874.27	2666.14	-0.108443	2874.27	2666.14	-0.108443	-0.0887997	0.88615	0.0524928	0.999503	lncRNA	chr22	41174591-41197456	-	ENSG00000231993.1
XLOC_040983	XLOC_040983	EPB41L4A-AS1	-16.5721	chr5:112141828-112419277	TKS4_WT	TKS4_WT_T	14823.7	12367.1	-0.261403	14823.7	12367.1	-0.261398	-0.235081	0.74245	0.129333	0.999503	lncRNA	chr5	112160526-112164818	+	ENSG00000224032.8
XLOC_029802	XLOC_029802	EPCAM-DT	222.477	chr2:47192404-47345074	TKS4_WT	TKS4_WT_T	52.9361	170.707	1.6892	52.9361	170.707	1.6892	0	1	0	1	lncRNA	chr2	47192405-47345074	-	ENSG00000234690.7
XLOC_049168	XLOC_049168	EPHA1-AS1	-54.4697	chr7:143353399-143523449	TKS4_WT	TKS4_WT_T	124.977	56.9024	-1.1351	124.977	56.9024	-1.1351	0	1	0	1	lncRNA	chr7	143407784-143523449	+	ENSG00000229153.6
XLOC_021941	XLOC_021941	EPN2-AS1	-99.84	chr17:19237376-19387190	TKS4_WT	TKS4_WT_T	62.4884	0		62.4884	0.1	-9.28744	0	1	0	1	lncRNA	chr17	19296596-19306261	-	ENSG00000235397.1
XLOC_000716	XLOC_000716	EPS15-AS1	168.642	chr1:51354262-51598769	TKS4_WT	TKS4_WT_T	31.2442	83.935	1.42568	31.2442	83.935	1.42568	0.0819427	0.47455	0.323718	0.999503	lncRNA	chr1	51518309-51561629	+	ENSG00000227070.1
XLOC_003076	XLOC_003076	ERI3-IT1	-0.520868	chr1:44221069-44355298	TKS4_WT	TKS4_WT_T	391.846	389.805	-0.0075336	391.846	389.805	-0.00753417	-0.000710898	0.96615	0.0149554	0.999503	lncRNA	chr1	44243408-44244273	-	ENSG00000233602.1
XLOC_051668	XLOC_051668	ERICD	76.3712	chr8:140520155-140642406	TKS4_WT	TKS4_WT_T	2498.14	4406	0.818612	2498.14	4406	0.818615	0.0790777	0.63425	0.19774	0.999503	lncRNA	chr8	140636281-140638283	+	ENSG00000280303.2
XLOC_035824	XLOC_035824	ERICH6-AS1	28.811	chr3:150659884-150720868	TKS4_WT	TKS4_WT_T	230.849	297.359	0.365255	230.849	297.359	0.365256	0.273876	0.77455	0.110951	0.999503	lncRNA	chr3	150703486-150723005	+	ENSG00000240137.7
XLOC_002052	XLOC_002052	ERLNC1	-99.6799	chr1:204131061-204152044	TKS4_WT	TKS4_WT_T	31.2442	0		31.2442	0.1	-8.28744	0	1	0	1	lncRNA	chr1	204141404-204143327	+	ENSG00000230550.2
XLOC_019444	XLOC_019444	ERVK13-1	26.5137	chr16:2658388-2673439	TKS4_WT	TKS4_WT_T	10370.1	13119.6	0.339299	10370.1	13119.6	0.339294	0.312003	0.64665	0.189331	0.999503	lncRNA	chr16	2660348-2682390	-	ENSG00000260565.8
XLOC_025441	XLOC_025441	ERVK3-1,ZNF8,ZNF8-ERVK3-1	-10.043	chr19:58278954-58342336	TKS4_WT	TKS4_WT_T	59934.4	53915.2	-0.152691	59934.4	53915.2	-0.152692	-0.158063	0.82415	0.0839937	0.999503	protein_coding,protein_coding,lncRNA
XLOC_016792	XLOC_016792	EWSAT1	28351.2	chr15:69080849-69095824	TKS4_WT	TKS4_WT_T	0	28.4512		0.1	28.4512	8.15235	0	1	0	1	lncRNA	chr15	69072926-69095820	+	ENSG00000212766.9
XLOC_041569	XLOC_041569	EXOC3-AS1	15.0091	chr5:441834-443160	TKS4_WT	TKS4_WT_T	1856.74	2135.42	0.201744	1856.74	2135.42	0.201748	0.151242	0.82665	0.0826783	0.999503	lncRNA	chr5	441498-443160	-	ENSG00000221990.5
XLOC_000158	XLOC_000158	EXOSC10-AS1	-45.3516	chr1:11066612-11102105	TKS4_WT	TKS4_WT_T	348.861	190.647	-0.871749	348.861	190.647	-0.871748	-0.0455958	0.6853	0.164119	0.999503	lncRNA	chr1	11099430-11102100	+	ENSG00000230337.2
XLOC_000702	XLOC_000702	FAF1-AS1	-54.4697	chr1:50437027-50960267	TKS4_WT	TKS4_WT_T	124.977	56.9024	-1.1351	124.977	56.9024	-1.1351	0	1	0	1	lncRNA	chr1	50461469-50471150	+	ENSG00000225767.1
XLOC_001443	XLOC_001443	FALEC	-99.8267	chr1:150515756-150518032	TKS4_WT	TKS4_WT_T	57.7122	0		57.7122	0.1	-9.17273		0.0702	1.15366	0.999503	lncRNA	chr1	150515757-150518032	+	ENSG00000228126.1
XLOC_009167	XLOC_009167	FAM111A-DT,LOC100422399	-3.48084	chr11:59133971-59142808	TKS4_WT	TKS4_WT_T	1207.18	1165.16	-0.051114	1207.18	1165.16	-0.0511127	-0.0346201	0.9602	0.0176383	0.999503	lncRNA,-
XLOC_054292	XLOC_054292	FAM138C	28351.2	chr9:34393-35864	TKS4_WT	TKS4_WT_T	0	28.4512		0.1	28.4512	8.15235	0	1	0	1	lncRNA	chr9	34394-37269	-	ENSG00000218839.5
XLOC_038442	XLOC_038442	FAM13A-AS1	1.28155	chr4:88709788-89114901	TKS4_WT	TKS4_WT_T	817.524	828.001	0.0183725	817.524	828.001	0.0183714	0.00266838	0.98375	0.00711525	0.999503	lncRNA	chr4	88709298-88730103	+	ENSG00000248019.3
XLOC_041494	XLOC_041494	FAM153CP	-99.6799	chr5:178007691-178063588	TKS4_WT	TKS4_WT_T	31.2442	0		31.2442	0.1	-8.28744	0	1	0	1	lncRNA	chr5	178006348-178086529	+	ENSG00000204677.13
XLOC_055398	XLOC_055398	FAM166A,STPG3-AS1	107.49	chr9:137241286-137253497	TKS4_WT	TKS4_WT_T	218.709	453.8	1.05304	218.709	453.8	1.05304	0	1	0	1	protein_coding,lncRNA
XLOC_032246	XLOC_032246	FAM182B	-50.7016	chr20:25763451-25801291	TKS4_WT	TKS4_WT_T	57.7122	28.4512	-1.02039	57.7122	28.4512	-1.02039	-0.506093	0.53745	0.269662	0.999503	lncRNA	chr20	25762384-25868225	-	ENSG00000175170.16
XLOC_053479	XLOC_053479	FAM201A	-32.3487	chr9:38621087-38623284	TKS4_WT	TKS4_WT_T	2561.43	1732.84	-0.563807	2561.43	1732.84	-0.563811	-0.428376	0.52835	0.277078	0.999503	lncRNA	chr9	38620474-38624990	+	ENSG00000204860.5
XLOC_022399	XLOC_022399	FAM215B	-65.8521	chr17:46500212-47100283	TKS4_WT	TKS4_WT_T	249.953	85.3536	-1.55014	249.953	85.3536	-1.55013	-0.0437994	0.6543	0.184223	0.999503	lncRNA	chr17	46558830-46562795	-	ENSG00000232300.1
XLOC_012332	XLOC_012332	FAM222A-AS1	3.56323	chr12:109713824-109773487	TKS4_WT	TKS4_WT_T	3097.75	3208.13	0.0505097	3097.75	3208.13	0.0505119	0.0269187	0.95465	0.0201558	0.999503	lncRNA	chr12	109734166-109773508	-	ENSG00000255650.6
XLOC_056641	XLOC_056641	FAM223A	-99.6799	chrX:154571247-154571960	TKS4_WT	TKS4_WT_T	31.2442	0		31.2442	0.1	-8.28744		0.00495	2.30539	0.628718	lncRNA	chrX	154571248-154571960	+	ENSG00000279245.1
XLOC_053978	XLOC_053978	FAM225A	28351.2	chr9:113112895-113119846	TKS4_WT	TKS4_WT_T	0	28.4512		0.1	28.4512	8.15235	0	1	0	1	lncRNA	chr9	113113042-113119928	+	ENSG00000231528.3
XLOC_033982	XLOC_033982	FAM230D	-99.6222	chr22:18178025-18205909	TKS4_WT	TKS4_WT_T	26.468	0		26.468	0.1	-8.04811	0	1	0	1	lncRNA	chr22	18178038-18205915	-	ENSG00000187979.4
XLOC_034048	XLOC_034048	FAM230H	28351.2	chr22:21300984-21326636	TKS4_WT	TKS4_WT_T	0	28.4512		0.1	28.4512	8.15235	0	1	0	1	lncRNA	chr22	21300990-21325042	-	ENSG00000206142.9
XLOC_011907	XLOC_011907	FAM242C,SMUG1	7.57446	chr12:54058253-54188985	TKS4_WT	TKS4_WT_T	20534.8	22090.2	0.105335	20534.8	22090.2	0.105336	0.101413	0.8982	0.0466269	0.999503	lncRNA,protein_coding
XLOC_053551	XLOC_053551	FAM27C	28351.2	chr9:61854083-61855340	TKS4_WT	TKS4_WT_T	0	28.4512		0.1	28.4512	8.15235		0.1202	0.920096	0.999503	lncRNA	chr9	61854148-62096920	+	ENSG00000231527.7
XLOC_054730	XLOC_054730	FAM27E3	6.1366	chr9:67677209-67724090	TKS4_WT	TKS4_WT_T	1156.83	1227.82	0.0859148	1156.83	1227.82	0.0859222	0.0584809	0.9331	0.0300718	0.999503	lncRNA	chr9	67717411-67719178	-	ENSG00000274026.2
XLOC_051805	XLOC_051805	FAM66B	28351.2	chr8:7298743-7355363	TKS4_WT	TKS4_WT_T	0	28.4512		0.1	28.4512	8.15235		0.0688	1.16241	0.999503	lncRNA	chr8	7298744-7355359	-	ENSG00000215374.6
XLOC_010236	XLOC_010236	FAM66C	16.4296	chr12:8180208-8218911	TKS4_WT	TKS4_WT_T	218.709	254.642	0.219457	218.709	254.642	0.219458	0.155818	0.766	0.115771	0.999503	lncRNA	chr12	8180209-8216151	+	ENSG00000226711.8
XLOC_050846	XLOC_050846	FAM66D	-99.6799	chr8:12115781-12158034	TKS4_WT	TKS4_WT_T	31.2442	0		31.2442	0.1	-8.28744	0	1	0	1	lncRNA	chr8	12115767-12177550	+	ENSG00000255052.5
XLOC_001743	XLOC_001743	FAM78B-AS1	1259.23	chr1:166055917-166340894	TKS4_WT	TKS4_WT_T	62.4884	849.359	3.76472	62.4884	849.359	3.76471	2.42422	0.34945	0.456615	0.999503	lncRNA	chr1	166081183-166087483	+	ENSG00000203307.2
XLOC_052666	XLOC_052666	FAM83A-AS1	-99.9055	chr8:123179046-123210079	TKS4_WT	TKS4_WT_T	105.872	0		105.872	0.1	-10.0481	0	1	0	1	lncRNA	chr8	123193651-123202743	-	ENSG00000204949.10
XLOC_051835	XLOC_051835	FAM85B	28351.2	chr8:8100761-8227503	TKS4_WT	TKS4_WT_T	0	28.4512		0.1	28.4512	8.15235	0	1	0	1	lncRNA	chr8	8167819-8226614	-	ENSG00000253893.2
XLOC_051750	XLOC_051750	FAM87A	28351.2	chr8:375930-383174	TKS4_WT	TKS4_WT_T	0	28.4512		0.1	28.4512	8.15235	0	1	0	1	lncRNA	chr8	375931-384079	-	ENSG00000182366.11
XLOC_019794	XLOC_019794	FBXL19-AS1	5.7318	chr16:30919318-30948783	TKS4_WT	TKS4_WT_T	6988.55	7389.12	0.0804085	6988.55	7389.12	0.0804094	0.0300729	0.80485	0.0942851	0.999503	lncRNA	chr16	30919319-30923269	-	ENSG00000260852.1
XLOC_052676	XLOC_052676	FER1L6-AS2	-99.8111	chr8:123851986-124171522	TKS4_WT	TKS4_WT_T	52.9361	0		52.9361	0.1	-9.04811	0	1	0	1	lncRNA	chr8	124044395-124171522	-	ENSG00000253868.4
XLOC_048957	XLOC_048957	FEZF1-AS1	57.839	chr7:122300938-122311855	TKS4_WT	TKS4_WT_T	2055.95	3245.09	0.658456	2055.95	3245.09	0.658453	0.532467	0.43775	0.358774	0.999503	lncRNA	chr7	122303658-122310119	+	ENSG00000230316.8
XLOC_036288	XLOC_036288	FGD5-AS1	18.4893	chr3:14942778-15065315	TKS4_WT	TKS4_WT_T	82357.8	97585.2	0.244758	82357.8	97585.2	0.244757	0.159646	0.861	0.0649968	0.999503	lncRNA	chr3	14920347-14948424	-	ENSG00000225733.7
XLOC_013979	XLOC_013979	FGF14,FGF14-IT1	140737	chr13:101452635-102402443	TKS4_WT	TKS4_WT_T	0	140.837		0.1	140.837	10.4598		5e-05	4.30103	0.0217956	protein_coding,lncRNA
XLOC_003226	XLOC_003226	FGGY-DT	-3.31511	chr1:59289222-59762730	TKS4_WT	TKS4_WT_T	519.41	502.191	-0.0486369	519.41	502.191	-0.0486376	-0.0135394	0.96205	0.0168024	0.999503	lncRNA	chr1	59131932-59296491	-	ENSG00000224609.8
XLOC_002690	XLOC_002690	FHAD1-AS1	85253.6	chr1:15236520-15430339	TKS4_WT	TKS4_WT_T	0	85.3536		0.1	85.3536	9.73731	0	1	0	1	lncRNA	chr1	15326680-15343876	-	ENSG00000233485.1
XLOC_057489	XLOC_057489	FIRRE,MCRIP2P1	2.18553	chrX:131691524-131830643	TKS4_WT	TKS4_WT_T	7981.6	8156.04	0.0311901	7981.6	8156.04	0.0311909	0.0286489	0.971	0.0127808	0.999503	lncRNA,processed_pseudogene
XLOC_048233	XLOC_048233	FKBP14-AS1	-99.8267	chr7:29920102-30026702	TKS4_WT	TKS4_WT_T	57.7122	0		57.7122	0.1	-9.17273		0.10615	0.97408	0.999503	lncRNA	chr7	29988600-30027543	+	ENSG00000227014.6
XLOC_001481	XLOC_001481	FLG-AS1	72.3004	chr1:152302164-152366692	TKS4_WT	TKS4_WT_T	110.648	190.647	0.784921	110.648	190.647	0.784926	0.315411	0.6604	0.180193	0.999503	lncRNA	chr1	152168125-152445456	+	ENSG00000237975.7
XLOC_010632	XLOC_010632	FLJ12825	127.652	chr12:54058253-54188985	TKS4_WT	TKS4_WT_T	62.4884	142.256	1.18683	62.4884	142.256	1.18683	0	1	0	1	lncRNA	chr12	54058254-54122235	+	ENSG00000248265.2
XLOC_010428	XLOC_010428	FLJ13224	-48.3508	chr12:31280583-31326218	TKS4_WT	TKS4_WT_T	641.799	331.484	-0.953183	641.799	331.484	-0.953182	-0.0441345	0.67475	0.170857	0.999503	lncRNA	chr12	31324316-31325829	+	ENSG00000177340.5
XLOC_031961	XLOC_031961	FLJ16779	26932.6	chr20:63240779-63261615	TKS4_WT	TKS4_WT_T	0	27.0326		0.1	27.0326	8.07856	0	1	0	1	lncRNA	chr20	63253978-63261615	+	ENSG00000275620.1
XLOC_038486	XLOC_038486	FLJ20021	16.6074	chr4:101023417-101348883	TKS4_WT	TKS4_WT_T	8309.97	9690.04	0.22166	8309.97	9690.04	0.221659	0.051404	0.91575	0.0382231	0.999503	lncRNA	chr4	101347752-101348887	+	ENSG00000254531.2
XLOC_002699	XLOC_002699	FLJ37453	98.8821	chr1:15834214-15976132	TKS4_WT	TKS4_WT_T	1296.14	2577.79	0.991916	1296.14	2577.79	0.991913	0.102768	0.5833	0.234108	0.999503	lncRNA	chr1	15834474-15848147	-	ENSG00000179743.4
XLOC_036658	XLOC_036658	FLNB-AS1	-61.5258	chr3:58008421-58172251	TKS4_WT	TKS4_WT_T	440.006	169.289	-1.37804	440.006	169.289	-1.37803	-0.0419741	0.47315	0.325001	0.999503	lncRNA	chr3	58162547-58170636	-	ENSG00000244161.1
XLOC_004581	XLOC_004581	FLVCR1-DT	-51.3708	chr1:212856603-212858138	TKS4_WT	TKS4_WT_T	3811.99	1853.74	-1.04011	3811.99	1853.74	-1.04011	-0.875175	0.1855	0.731656	0.999503	lncRNA	chr1	212852105-212858138	-	ENSG00000198468.10
XLOC_022377	XLOC_022377	FMNL1-DT	109449	chr17:45190930-45247322	TKS4_WT	TKS4_WT_T	0	109.549		0.1	109.549	10.0974		0.235	0.628932	0.999503	lncRNA	chr17	45190931-45222222	-	ENSG00000267121.6
XLOC_057620	XLOC_057620	FMR1-AS1	308.531	chrX:147909430-147911817	TKS4_WT	TKS4_WT_T	26.468	108.13	2.03045	26.468	108.13	2.03045	0	1	0	1	lncRNA	chrX	147909431-147911817	-	ENSG00000268066.5
XLOC_042976	XLOC_042976	FOXCUT	-54.4696	chr6:1605530-1607358	TKS4_WT	TKS4_WT_T	62.4884	28.4512	-1.1351	62.4884	28.4512	-1.1351	0	1	0	1	lncRNA	chr6	1601654-1607354	+	ENSG00000280916.3
XLOC_003131	XLOC_003131	FOXD2-AS1	145.667	chr1:47380795-47437317	TKS4_WT	TKS4_WT_T	2060.33	5061.55	1.29671	2060.33	5061.55	1.2967	0.932178	0.17975	0.745331	0.999503	lncRNA	chr1	47432133-47434641	-	ENSG00000237424.1
XLOC_003249	XLOC_003249	FOXD3-AS1	75.416	chr1:63320883-63325128	TKS4_WT	TKS4_WT_T	204.381	358.517	0.81078	204.381	358.517	0.81078	0.311098	0.68725	0.162885	0.999503	lncRNA	chr1	63320878-63324441	-	ENSG00000230798.6
XLOC_014728	XLOC_014728	FOXN3-AS1	30.6897	chr14:89156176-89619165	TKS4_WT	TKS4_WT_T	986.283	1288.97	0.38615	986.283	1288.97	0.386145	0.0772201	0.8841	0.0534986	0.999503	lncRNA	chr14	89417354-89419793	+	ENSG00000258920.1
XLOC_003034	XLOC_003034	FOXO6-AS1	28351.2	chr1:41361433-41383590	TKS4_WT	TKS4_WT_T	0	28.4512		0.1	28.4512	8.15235	0	1	0	1	lncRNA	chr1	41375004-41375669	-	ENSG00000229901.1
XLOC_045054	XLOC_045054	FOXP4-AS1	-3.62644	chr6:41523894-41602384	TKS4_WT	TKS4_WT_T	649.562	626.006	-0.0532906	649.562	626.006	-0.0532908	-0.00846058	0.95565	0.0197011	0.999503	lncRNA	chr6	41452889-41548621	-	ENSG00000234753.6
XLOC_040197	XLOC_040197	FRG1-DT	-44.6408	chr4:189764390-189940733	TKS4_WT	TKS4_WT_T	298.113	165.033	-0.853109	298.113	165.033	-0.853105	-0.380343	0.56825	0.245461	0.999503	lncRNA	chr4	189764391-189940733	-	ENSG00000245685.8
XLOC_015350	XLOC_015350	FRMD6-AS1	-18.4941	chr14:51454511-51730727	TKS4_WT	TKS4_WT_T	1928.78	1572.07	-0.295028	1928.78	1572.07	-0.295023	-0.082104	0.89615	0.0476193	0.999503	lncRNA	chr14	51649516-51651744	-	ENSG00000273888.1
XLOC_013526	XLOC_013526	FRY-AS1	73.0408	chr13:32024045-32031639	TKS4_WT	TKS4_WT_T	31.2442	54.0652	0.791113	31.2442	54.0652	0.791112	0	1	0	1	lncRNA	chr13	32025314-32031639	-	ENSG00000237637.1
XLOC_030884	XLOC_030884	FSIP2-AS1	26932.6	chr2:185719873-185833290	TKS4_WT	TKS4_WT_T	0	27.0326		0.1	27.0326	8.07856	0	1	0	1	lncRNA	chr2	185652374-185800151	-	ENSG00000231646.6
XLOC_057144	XLOC_057144	FTX	-7.29233	chrX:73944323-74293574	TKS4_WT	TKS4_WT_T	1968.78	1825.21	-0.10924	1968.78	1825.21	-0.109239	-0.0545922	0.93905	0.0273113	0.999503	lncRNA	chrX	73940435-74293574	-	ENSG00000230590.12
XLOC_015460	XLOC_015460	FUT8-AS1	-19.8713	chr14:65410591-65744122	TKS4_WT	TKS4_WT_T	793.643	635.936	-0.319609	793.643	635.936	-0.319609	-0.0470217	0.8641	0.063436	0.999503	lncRNA	chr14	65411170-65412690	-	ENSG00000276116.2
XLOC_008136	XLOC_008136	FZD4-DT	202.821	chr11:86955620-87000950	TKS4_WT	TKS4_WT_T	62.4884	189.228	1.59847	62.4884	189.228	1.59847	0	1	0	1	lncRNA	chr11	86955616-87021909	+	ENSG00000246523.9
XLOC_011495	XLOC_011495	GABARAPL1-AS1	-74.2867	chr12:10212876-10223128	TKS4_WT	TKS4_WT_T	110.648	28.4512	-1.95942	110.648	28.4512	-1.95942	-0.19586	0.4955	0.304956	0.999503	lncRNA	chr12	10214161-10214761	-	ENSG00000255958.1
XLOC_016642	XLOC_016642	GABPB1-AS1	-27.811	chr15:50275388-50359306	TKS4_WT	TKS4_WT_T	26409.3	19064.6	-0.470151	26409.3	19064.6	-0.47015	-0.233586	0.7932	0.100617	0.999503	lncRNA	chr15	50354950-50372202	+	ENSG00000244879.9
XLOC_017481	XLOC_017481	GABPB1-IT1	15.571	chr15:50275388-50359306	TKS4_WT	TKS4_WT_T	8895.05	10280.1	0.208781	8895.05	10280.1	0.20878	0.0838863	0.7218	0.141583	0.999503	lncRNA	chr15	50348936-50354861	-	ENSG00000285410.1
XLOC_023254	XLOC_023254	GAPLINC	-99.6222	chr18:3461843-3481830	TKS4_WT	TKS4_WT_T	26.468	0		26.468	0.1	-8.04811	0	1	0	1	lncRNA	chr18	3466250-3478978	+	ENSG00000266835.6
XLOC_049572	XLOC_049572	GARS1-DT	-41.8144	chr7:30548356-30577779	TKS4_WT	TKS4_WT_T	2173.56	1264.7	-0.781267	2173.56	1264.7	-0.781265	-0.548782	0.4438	0.352813	0.999503	lncRNA	chr7	30516309-30595286	-	ENSG00000196295.13
XLOC_004248	XLOC_004248	GAS5,SNORA103	80.9403	chr1:173863247-173903547	TKS4_WT	TKS4_WT_T	86203	155976	0.85551	86203	155976	0.855514	0.652668	0.4681	0.329661	0.999503	lncRNA,-
XLOC_001828	XLOC_001828	GAS5-AS1	5.01523	chr1:173863247-173903547	TKS4_WT	TKS4_WT_T	288.561	303.033	0.0705977	288.561	303.033	0.0705986	0.00312415	0.95485	0.0200648	0.999503	lncRNA	chr1	173862473-173863941	+	ENSG00000270084.2
XLOC_013366	XLOC_013366	GAS6-AS1,TMEM255B	-5.68199	chr13:113759216-113864076	TKS4_WT	TKS4_WT_T	6233.91	5879.7	-0.0843946	6233.91	5879.7	-0.0843948	-0.0407117	0.9612	0.0171862	0.999503	lncRNA,protein_coding
XLOC_013367	XLOC_013367	GAS6-DT	-38.3031	chr13:113864176-113866832	TKS4_WT	TKS4_WT_T	2119.23	1307.5	-0.696737	2119.23	1307.5	-0.696729	-0.489311	0.46425	0.333248	0.999503	lncRNA	chr13	113864112-113866834	+	ENSG00000272695.2
XLOC_020287	XLOC_020287	GAS8-AS1	85253.6	chr16:90004870-90047783	TKS4_WT	TKS4_WT_T	0	85.3536		0.1	85.3536	9.73731	0	1	0	1	lncRNA	chr16	90028908-90029901	-	ENSG00000221819.6
XLOC_051482	XLOC_051482	GASAL1	51.9857	chr8:102806821-102811214	TKS4_WT	TKS4_WT_T	2441.23	3710.32	0.603937	2441.23	3710.32	0.603935	0.512239	0.4434	0.353204	0.999503	lncRNA	chr8	102805517-102810039	+	ENSG00000253669.4
XLOC_035661	XLOC_035661	GATA2-AS1	-56.6425	chr3:128479421-128503207	TKS4_WT	TKS4_WT_T	3290.99	1426.89	-1.20564	3290.99	1426.89	-1.20565	-0.448001	0.63375	0.198082	0.999503	lncRNA	chr3	128489212-128502970	+	ENSG00000244300.3
XLOC_006118	XLOC_006118	GATA3-AS1	56802.4	chr10:8045419-8075198	TKS4_WT	TKS4_WT_T	0	56.9024		0.1	56.9024	9.15235	0	1	0	1	lncRNA	chr10	8050450-8053484	-	ENSG00000197308.9
XLOC_023858	XLOC_023858	GATA6-AS1	142156	chr18:22166897-22168968	TKS4_WT	TKS4_WT_T	0	142.256		0.1	142.256	10.4743	0	1	0	1	lncRNA	chr18	22164886-22169878	-	ENSG00000266010.3
XLOC_030343	XLOC_030343	GCC2-AS1	250.622	chr2:108448560-108687246	TKS4_WT	TKS4_WT_T	31.2442	109.549	1.80992	31.2442	109.549	1.80992	0.0917383	0.48405	0.31511	0.999503	lncRNA	chr2	108507515-108534196	-	ENSG00000214184.3
XLOC_026235	XLOC_026235	GEMIN7-AS1	219.799	chr19:45071499-45091518	TKS4_WT	TKS4_WT_T	52.9361	169.289	1.67716	52.9361	169.289	1.67716	0.174067	0.51185	0.290857	0.999503	lncRNA	chr19	45076510-45092635	-	ENSG00000267348.3
XLOC_049226	XLOC_049226	GHET1	-5.95366	chr7:148987526-148989429	TKS4_WT	TKS4_WT_T	709.463	667.224	-0.0885551	709.463	667.224	-0.0885563	-0.0619592	0.9327	0.030258	0.999503	lncRNA	chr7	148987527-148989432	+	ENSG00000281189.1
XLOC_034783	XLOC_034783	GHRLOS,MIR12127,TATDN2	2.22002	chr3:10248458-10293449	TKS4_WT	TKS4_WT_T	61837.3	63210.1	0.0316798	61837.3	63210.1	0.0316778	0.0333099	0.96	0.0177288	0.999503	lncRNA,-,protein_coding
XLOC_011995	XLOC_011995	GIHCG	-21.8708	chr12:57931448-57936164	TKS4_WT	TKS4_WT_T	3889.61	3038.92	-0.356065	3889.61	3038.92	-0.356067	-0.253321	0.73165	0.135697	0.999503	lncRNA	chr12	57930115-57936345	-	ENSG00000257698.3
XLOC_049429	XLOC_049429	GLCCI1-DT	-13.4796	chr7:7949838-7968752	TKS4_WT	TKS4_WT_T	31.2442	27.0326	-0.208887	31.2442	27.0326	-0.208888	0	1	0	1	lncRNA	chr7	7958183-7969903	-	ENSG00000233108.1
XLOC_054608	XLOC_054608	GLIDR	-13.7398	chr9:39803495-39810159	TKS4_WT	TKS4_WT_T	803.195	692.838	-0.213232	803.195	692.838	-0.213232	-0.146838	0.82825	0.0818386	0.999503	lncRNA	chr9	39709535-39810128	-	ENSG00000278175.5
XLOC_036609	XLOC_036609	GLYCTK-AS1	28351.2	chr3:52282892-52295257	TKS4_WT	TKS4_WT_T	0	28.4512		0.1	28.4512	8.15235	0	1	0	1	lncRNA	chr3	52288580-52299067	-	ENSG00000242797.3
XLOC_042980	XLOC_042980	GMDS-DT	22.5981	chr6:2245752-2413591	TKS4_WT	TKS4_WT_T	199.605	244.712	0.293939	199.605	244.712	0.293937	0.107039	0.86075	0.065123	0.999503	lncRNA	chr6	2245718-2525976	+	ENSG00000250903.10
XLOC_025547	XLOC_025547	GNA15-DT	-99.9295	chr19:3136032-3163749	TKS4_WT	TKS4_WT_T	141.893	0		141.893	0.1	-10.4706		0.24095	0.618073	0.999503	lncRNA	chr19	3141576-3155175	-	ENSG00000267551.3
XLOC_032571	XLOC_032571	GNAS-AS1	26932.6	chr20:58818917-58911196	TKS4_WT	TKS4_WT_T	0	27.0326		0.1	27.0326	8.07856	0	1	0	1	lncRNA	chr20	58818918-58850903	-	ENSG00000235590.8
XLOC_000860	XLOC_000860	GNG12-AS1	264.244	chr1:67701474-68233018	TKS4_WT	TKS4_WT_T	31.2442	113.805	1.8649	31.2442	113.805	1.8649	0	1	0	1	lncRNA	chr1	67832297-68202987	+	ENSG00000232284.8
XLOC_036408	XLOC_036408	GOLGA4-AS1	-7.9185	chr3:37241790-37366879	TKS4_WT	TKS4_WT_T	2130.58	1961.87	-0.119013	2130.58	1961.87	-0.119017	-0.015646	0.94335	0.0253271	0.999503	lncRNA	chr3	37241789-37244177	-	ENSG00000270194.1
XLOC_017252	XLOC_017252	GOLGA8M	-18.2996	chr15:28698694-28758362	TKS4_WT	TKS4_WT_T	271.645	221.935	-0.291586	271.645	221.935	-0.291585	-0.0864289	0.70185	0.153756	0.999503	lncRNA	chr15	28719377-28738431	-	ENSG00000261480.1
XLOC_004219	XLOC_004219	GORAB-AS1	82416.4	chr1:170461316-170553834	TKS4_WT	TKS4_WT_T	0	82.5164		0.1	82.5164	9.68854		0.20845	0.680998	0.999503	lncRNA	chr1	170460453-170532647	-	ENSG00000231407.6
XLOC_025354	XLOC_025354	GP6-AS1	85253.6	chr19:55006032-55069531	TKS4_WT	TKS4_WT_T	0	85.3536		0.1	85.3536	9.73731	0	1	0	1	lncRNA	chr19	55006193-55048086	+	ENSG00000267265.6
XLOC_016517	XLOC_016517	GPR176-DT	459.001	chr15:39921015-39925880	TKS4_WT	TKS4_WT_T	79.4041	443.87	2.48285	79.4041	443.87	2.48285	2.42447	0.2316	0.635261	0.999503	lncRNA	chr15	39921042-39925880	+	ENSG00000246863.2
XLOC_029109	XLOC_029109	GPR1-AS	26932.6	chr2:206175315-206266243	TKS4_WT	TKS4_WT_T	0	27.0326		0.1	27.0326	8.07856	0	1	0	1	lncRNA	chr2	206203543-206265326	+	ENSG00000279220.4
XLOC_010311	XLOC_010311	GPRC5D-AS1	-43.1281	chr12:12927725-13022498	TKS4_WT	TKS4_WT_T	3739.95	2126.98	-0.81421	3739.95	2126.98	-0.814213	-0.306445	0.5722	0.242452	0.999503	lncRNA	chr12	12927712-12984645	+	ENSG00000247498.11
XLOC_029476	XLOC_029476	GRASLND	56802.4	chr2:6912275-7077880	TKS4_WT	TKS4_WT_T	0	56.9024		0.1	56.9024	9.15235	0	1	0	1	lncRNA	chr2	6911754-6918734	-	ENSG00000228203.7
XLOC_023850	XLOC_023850	GREB1L-DT	2.13314	chr18:21240629-21242186	TKS4_WT	TKS4_WT_T	26.468	27.0326	0.0304486	26.468	27.0326	0.0304511	0	1	0	1	lncRNA	chr18	21240675-21241371	-	ENSG00000265984.1
XLOC_002814	XLOC_002814	GRHL3-AS1	82.1215	chr1:24305927-24472983	TKS4_WT	TKS4_WT_T	31.2442	56.9024	0.864901	31.2442	56.9024	0.864901	0	1	0	1	lncRNA	chr1	24307556-24321901	-	ENSG00000232298.2
XLOC_005907	XLOC_005907	GRK5-IT1	-9.6254	chr10:119207570-119459745	TKS4_WT	TKS4_WT_T	579.311	523.55	-0.146012	579.311	523.55	-0.146011	-0.0376503	0.91985	0.036283	0.999503	lncRNA	chr10	119208531-119211760	+	ENSG00000228485.1
XLOC_050002	XLOC_050002	GRM3-AS1	-44.2233	chr7:86643908-86864879	TKS4_WT	TKS4_WT_T	586.675	327.228	-0.842263	586.675	327.228	-0.842265	-0.360252	0.7176	0.144118	0.999503	lncRNA	chr7	86782357-86803409	-	ENSG00000233073.2
XLOC_013362	XLOC_013362	GRTP1-AS1	-99.84	chr13:113297238-113364158	TKS4_WT	TKS4_WT_T	62.4884	0		62.4884	0.1	-9.28744	0	1	0	1	lncRNA	chr13	113351645-113361868	+	ENSG00000225083.2
XLOC_048545	XLOC_048545	GS1-124K5.4	-43.7058	chr7:66493631-66495474	TKS4_WT	TKS4_WT_T	2646.01	1489.55	-0.82894	2646.01	1489.55	-0.828942	-0.659592	0.4075	0.389872	0.999503	lncRNA	chr7	66493607-66495758	+	ENSG00000237310.3
XLOC_009903	XLOC_009903	GSEC	-60.3742	chr11:126304059-126355587	TKS4_WT	TKS4_WT_T	2032.07	805.224	-1.33549	2032.07	805.224	-1.33549	-0.272797	0.5645	0.248336	0.999503	lncRNA	chr11	126340882-126355587	-	ENSG00000280832.2
XLOC_055172	XLOC_055172	GSN-AS1	-20.0846	chr9:121178132-121332844	TKS4_WT	TKS4_WT_T	521.599	416.838	-0.323455	521.599	416.838	-0.323454	-0.0197679	0.8729	0.0590355	0.999503	lncRNA	chr9	121280768-121285530	-	ENSG00000235865.2
XLOC_034422	XLOC_034422	GTSE1-DT	111.798	chr22:46295142-46333699	TKS4_WT	TKS4_WT_T	315.029	667.224	1.08269	315.029	667.224	1.08269	0.118037	0.5666	0.246723	0.999503	lncRNA	chr22	46295143-46296660	-	ENSG00000277232.2
XLOC_034093	XLOC_034093	GUSBP11	-45.4844	chr22:23638486-23717423	TKS4_WT	TKS4_WT_T	11630.8	6340.6	-0.87526	11630.8	6340.6	-0.875259	-0.755981	0.26005	0.584943	0.999503	lncRNA	chr22	23638487-23717356	-	ENSG00000228315.12
XLOC_035676	XLOC_035676	H1-10-AS1	190.28	chr3:129314770-129324569	TKS4_WT	TKS4_WT_T	151.445	439.615	1.53745	151.445	439.615	1.53745	0.0882141	0.4804	0.318397	0.999503	lncRNA	chr3	129315392-129326225	+	ENSG00000206417.8
XLOC_008598	XLOC_008598	H19,MIR675	-41.5408	chr11:1947271-2013176	TKS4_WT	TKS4_WT_T	1372.56	802.387	-0.774494	1372.56	802.387	-0.774499	-0.130744	0.7945	0.0999061	0.999503	lncRNA,miRNA
XLOC_038482	XLOC_038482	H2AZ1-DT	-99.6799	chr4:99950493-100037705	TKS4_WT	TKS4_WT_T	31.2442	0		31.2442	0.1	-8.28744	0	1	0	1	lncRNA	chr4	99950006-100195099	+	ENSG00000245322.7
XLOC_030822	XLOC_030822	HAGLR	53.5381	chr2:176173188-176190907	TKS4_WT	TKS4_WT_T	88.9564	136.582	0.618593	88.9564	136.582	0.618597	0.165074	0.5238	0.280835	0.999503	lncRNA	chr2	176164051-176188958	-	ENSG00000224189.8
XLOC_031956	XLOC_031956	HAR1A	-2.77593	chr20:63095492-63104386	TKS4_WT	TKS4_WT_T	605.779	588.963	-0.0406137	605.779	588.963	-0.0406146	-0.0231219	0.97125	0.012669	0.999503	lncRNA	chr20	63102205-63104386	+	ENSG00000225978.3
XLOC_032616	XLOC_032616	HAR1B	-99.934	chr20:63095492-63104386	TKS4_WT	TKS4_WT_T	151.445	0		151.445	0.1	-10.5646	0	1	0	1	lncRNA	chr20	63090806-63102631	-	ENSG00000231133.8
XLOC_051566	XLOC_051566	HAS2-AS1	88.7104	chr8:121612115-121645325	TKS4_WT	TKS4_WT_T	88.9564	167.87	0.916174	88.9564	167.87	0.916174	0.379629	0.65325	0.184921	0.999503	lncRNA	chr8	121639293-121994185	+	ENSG00000248690.8
XLOC_056623	XLOC_056623	HCFC1-AS1	-99.84	chrX:153947555-153972360	TKS4_WT	TKS4_WT_T	62.4884	0		62.4884	0.1	-9.28744	0	1	0	1	lncRNA	chrX	153969325-153970087	+	ENSG00000235802.1
XLOC_043225	XLOC_043225	HCG11	246031	chr6:26486648-26527393	TKS4_WT	TKS4_WT_T	0	246.131		0.1	246.131	11.2652		0.23535	0.628286	0.999503	lncRNA	chr6	26521709-26527404	+	ENSG00000228223.3
XLOC_043344	XLOC_043344	HCG14	28351.2	chr6:28896529-28897320	TKS4_WT	TKS4_WT_T	0	28.4512		0.1	28.4512	8.15235	0	1	0	1	lncRNA	chr6	28896530-28897322	+	ENSG00000224157.1
XLOC_043352	XLOC_043352	HCG15	89.8195	chr6:28984748-28988567	TKS4_WT	TKS4_WT_T	57.7122	109.549	0.924627	57.7122	109.549	0.924628	0.412178	0.72015	0.142577	0.999503	lncRNA	chr6	28986203-28987484	+	ENSG00000227214.2
XLOC_044849	XLOC_044849	HCG17	-61.0301	chr6:30234038-30346894	TKS4_WT	TKS4_WT_T	211.744	82.5164	-1.35957	211.744	82.5164	-1.35957	-0.076825	0.62005	0.207573	0.999503	lncRNA	chr6	30234039-30326134	-	ENSG00000270604.5
XLOC_044850	XLOC_044850	HCG18	46.7019	chr6:30234038-30346894	TKS4_WT	TKS4_WT_T	28634.4	42007.2	0.552887	28634.4	42007.2	0.552887	0.451388	0.5394	0.268089	0.999503	lncRNA	chr6	30286690-30327382	-	ENSG00000231074.10
XLOC_043419	XLOC_043419	HCG20	313.892	chr6:30766824-30792250	TKS4_WT	TKS4_WT_T	26.468	109.549	2.04925	26.468	109.549	2.04926	1.22021	0.3983	0.39979	0.999503	lncRNA	chr6	30743790-30792250	+	ENSG00000228022.6
XLOC_043505	XLOC_043505	HCG25	28351.2	chr6:33249535-33271965	TKS4_WT	TKS4_WT_T	0	28.4512		0.1	28.4512	8.15235	0	1	0	1	lncRNA	chr6	33249534-33255167	+	ENSG00000232940.7
XLOC_043433	XLOC_043433	HCG27	-93.6033	chr6:31197759-31203968	TKS4_WT	TKS4_WT_T	444.782	28.4512	-3.96654	444.782	28.4512	-3.96654	-3.47841	0.24315	0.614126	0.999503	lncRNA	chr6	31197760-31203968	+	ENSG00000206344.8
XLOC_043389	XLOC_043389	HCG9	26932.6	chr6:29970371-29978403	TKS4_WT	TKS4_WT_T	0	27.0326		0.1	27.0326	8.07856	0	1	0	1	lncRNA	chr6	29975112-29978410	+	ENSG00000204625.10
XLOC_043441	XLOC_043441	HCP5	245.49	chr6:31463179-31465809	TKS4_WT	TKS4_WT_T	4217.37	14570.6	1.78865	4217.37	14570.6	1.78864	1.64937	0.0172	1.76447	0.999503	lncRNA	chr6	31463170-31478936	+	ENSG00000206337.12
XLOC_044833	XLOC_044833	HCP5B	-79.5749	chr6:29871894-29873783	TKS4_WT	TKS4_WT_T	271.645	55.4838	-2.29159	271.645	55.4838	-2.29158	-0.901665	0.2643	0.577903	0.999503	lncRNA	chr6	29871895-29873783	-	ENSG00000281831.1
XLOC_036274	XLOC_036274	HDAC11-AS1	66.3995	chr3:13476986-13506416	TKS4_WT	TKS4_WT_T	115.424	192.065	0.734649	115.424	192.065	0.734651	0.0938623	0.77825	0.108881	0.999503	lncRNA	chr3	13476982-13480053	-	ENSG00000244502.2
XLOC_044053	XLOC_044053	HDAC2-AS2	-17.8848	chr6:113933027-114469332	TKS4_WT	TKS4_WT_T	235.625	193.484	-0.284279	235.625	193.484	-0.284278	-0.012089	0.87825	0.0563818	0.999503	lncRNA	chr6	113969701-114471705	+	ENSG00000228624.8
XLOC_029392	XLOC_029392	HDAC4-AS1	-7.94084	chr2:239048167-239402364	TKS4_WT	TKS4_WT_T	302.89	278.838	-0.119367	302.89	278.838	-0.119367	-0.0198334	0.9462	0.0240171	0.999503	lncRNA	chr2	239401436-239402394	+	ENSG00000222020.4
XLOC_033484	XLOC_033484	HDHD5-AS1	253.575	chr22:17137519-17165445	TKS4_WT	TKS4_WT_T	110.648	391.224	1.82201	110.648	391.224	1.82202	0.100724	0.3753	0.425621	0.999503	lncRNA	chr22	17159352-17165447	+	ENSG00000185837.4
XLOC_021355	XLOC_021355	HEATR6-DT	-10.7553	chr17:60079308-60088695	TKS4_WT	TKS4_WT_T	156.221	139.419	-0.164163	156.221	139.419	-0.164161	-0.0674662	0.73135	0.135875	0.999503	lncRNA	chr17	60079309-60088713	+	ENSG00000267416.2
XLOC_048326	XLOC_048326	HECW1-IT1	-99.9134	chr7:43112579-43566001	TKS4_WT	TKS4_WT_T	115.424	0		115.424	0.1	-10.1727		0.18385	0.735536	0.999503	lncRNA	chr7	43117896-43163187	+	ENSG00000181211.1
XLOC_042787	XLOC_042787	HEIH	-22.6532	chr5:180829953-180835726	TKS4_WT	TKS4_WT_T	6073.32	4697.52	-0.370584	6073.32	4697.52	-0.370586	-0.220209	0.7541	0.122571	0.999503	lncRNA	chr5	180826871-180831618	-	ENSG00000278970.3
XLOC_021438	XLOC_021438	HELZ-AS1	-99.9134	chr17:67070443-67262080	TKS4_WT	TKS4_WT_T	115.424	0		115.424	0.1	-10.1727		0.1079	0.966979	0.999503	lncRNA	chr17	67244837-67245806	+	ENSG00000266473.1
XLOC_038440	XLOC_038440	HERC3,PIGY-DT	-8.75882	chr4:88523809-88709303	TKS4_WT	TKS4_WT_T	10379.6	9470.47	-0.132249	10379.6	9470.47	-0.132243	-0.109204	0.90575	0.0429917	0.999503	protein_coding,lncRNA
XLOC_048273	XLOC_048273	HERPUD2-AS1	15.9146	chr7:35632658-35699413	TKS4_WT	TKS4_WT_T	8892.06	10307.2	0.213065	8892.06	10307.2	0.213063	0.123475	0.86225	0.0643668	0.999503	lncRNA	chr7	35695214-35699413	+	ENSG00000271122.1
XLOC_016815	XLOC_016815	HEXA-AS1	-41.5872	chr15:72376112-72378788	TKS4_WT	TKS4_WT_T	194.829	113.805	-0.775645	194.829	113.805	-0.775644	-0.484012	0.36355	0.439436	0.999503	lncRNA	chr15	72376113-72378788	+	ENSG00000260339.1
XLOC_021633	XLOC_021633	HEXD-IT1	-99.9467	chr17:82389209-82450821	TKS4_WT	TKS4_WT_T	187.465	0		187.465	0.1	-10.8724	0	1	0	1	lncRNA	chr17	82425498-82427310	+	ENSG00000279066.1
XLOC_039915	XLOC_039915	HHIP-AS1	104.766	chr4:144642915-144646019	TKS4_WT	TKS4_WT_T	120.201	246.131	1.03398	120.201	246.131	1.03398	0.453089	0.50655	0.295378	0.999503	lncRNA	chr4	144642919-144661357	-	ENSG00000248890.3
XLOC_000874	XLOC_000874	HHLA3	-30.5493	chr1:70258998-70368023	TKS4_WT	TKS4_WT_T	2644.41	1836.56	-0.525941	2644.41	1836.56	-0.52594	-0.12385	0.75515	0.121967	0.999503	lncRNA	chr1	70354786-70385339	+	ENSG00000197568.15
XLOC_003305	XLOC_003305	HHLA3-AS1	136482	chr1:70258998-70368023	TKS4_WT	TKS4_WT_T	0	136.582		0.1	136.582	10.4156		0.1567	0.804931	0.999503	lncRNA	chr1	70359562-70360437	-	ENSG00000226088.1
XLOC_003624	XLOC_003624	HIPK1-AS1	-71.1599	chr1:113924000-113977869	TKS4_WT	TKS4_WT_T	93.7326	27.0326	-1.79385	93.7326	27.0326	-1.79385	0	1	0	1	lncRNA	chr1	113924000-113929495	-	ENSG00000235527.7
XLOC_044821	XLOC_044821	HLA-F-AS1,RPL23AP1	-11.6122	chr6:29723433-29749049	TKS4_WT	TKS4_WT_T	1007.58	890.578	-0.178075	1007.58	890.578	-0.178081	-0.0511972	0.9239	0.034375	0.999503	lncRNA,transcribed_processed_pseudogene
XLOC_004626	XLOC_004626	HLX-AS1	-99.8876	chr1:220832762-220885059	TKS4_WT	TKS4_WT_T	88.9564	0		88.9564	0.1	-9.79695		0.2356	0.627825	0.999503	lncRNA	chr1	220832763-220880140	-	ENSG00000257551.1
XLOC_032286	XLOC_032286	HM13-AS1	416.027	chr20:31514441-31577965	TKS4_WT	TKS4_WT_T	26.468	136.582	2.36744	26.468	136.582	2.36745	0.173001	0.4458	0.35086	0.999503	lncRNA	chr20	31567707-31573263	-	ENSG00000230613.1
XLOC_055266	XLOC_055266	HMGA1P4,LOC105376287	-57.7856	chr9:128663130-128696396	TKS4_WT	TKS4_WT_T	461.698	194.903	-1.2442	461.698	194.903	-1.24419	-0.0258269	0.4756	0.322758	0.999503	lncRNA,-
XLOC_012049	XLOC_012049	HMGA2-AS1	-23.7302	chr12:65758019-65966291	TKS4_WT	TKS4_WT_T	2687.8	2049.98	-0.390812	2687.8	2049.98	-0.390816	-0.0469574	0.8357	0.0779496	0.999503	lncRNA	chr12	65851340-65882167	-	ENSG00000197301.7
XLOC_012050	XLOC_012050	HMGA2-AS1	82.1215	chr12:65758019-65966291	TKS4_WT	TKS4_WT_T	31.2442	56.9024	0.864901	31.2442	56.9024	0.864901	0	1	0	1	lncRNA	chr12	65851340-65882167	-	ENSG00000197301.7
XLOC_021141	XLOC_021141	HMGN1P29,NBR2	-29.1204	chr17:43125556-43211688	TKS4_WT	TKS4_WT_T	1617.73	1146.64	-0.496562	1617.73	1146.64	-0.496558	-0.0621257	0.7087	0.149538	0.999503	-,lncRNA
XLOC_043846	XLOC_043846	HMGN3-AS1	-46.8324	chr6:79201244-79236800	TKS4_WT	TKS4_WT_T	901.704	479.414	-0.91138	901.704	479.414	-0.911382	-0.132973	0.7615	0.11833	0.999503	lncRNA	chr6	79233699-79236797	+	ENSG00000270362.2
XLOC_012452	XLOC_012452	HNF1A-AS1	-53.1596	chr12:120969837-120972292	TKS4_WT	TKS4_WT_T	57.7122	27.0326	-1.09418	57.7122	27.0326	-1.09418	-0.542695	0.52435	0.280379	0.999503	lncRNA	chr12	120941728-120980965	-	ENSG00000241388.5
XLOC_038393	XLOC_038393	HNRNPD-DT	55.1322	chr4:82374329-82384027	TKS4_WT	TKS4_WT_T	88.9564	138	0.6335	88.9564	138	0.633498	0.25574	0.7242	0.140141	0.999503	lncRNA	chr4	82374142-82384027	+	ENSG00000272677.2
XLOC_024649	XLOC_024649	HOMER3-AS1	-66.2021	chr19:18929200-18946831	TKS4_WT	TKS4_WT_T	84.1803	28.4512	-1.56499	84.1803	28.4512	-1.56499	-0.163473	0.5411	0.266722	0.999503	lncRNA	chr19	18940235-18947452	+	ENSG00000269019.2
XLOC_011901	XLOC_011901	HOTAIR	-63.5757	chr12:53962307-53977643	TKS4_WT	TKS4_WT_T	156.221	56.9024	-1.45703	156.221	56.9024	-1.45703	0	1	0	1	lncRNA	chr12	53962308-53974956	-	ENSG00000228630.5
XLOC_048207	XLOC_048207	HOTAIRM1	6.81764	chr7:27096093-27100258	TKS4_WT	TKS4_WT_T	1979.13	2114.06	0.0951477	1979.13	2114.06	0.0951499	0.0770499	0.9125	0.0397671	0.999503	lncRNA	chr7	27095647-27100265	+	ENSG00000233429.9
XLOC_048212	XLOC_048212	HOTTIP	21.0943	chr7:27200420-27207259	TKS4_WT	TKS4_WT_T	365.378	442.452	0.276131	365.378	442.452	0.276131	0.156748	0.82845	0.0817337	0.999503	lncRNA	chr7	27198575-27207259	+	ENSG00000243766.8
XLOC_048210	XLOC_048210	HOXA10-AS	33.4272	chr7:27162437-27180261	TKS4_WT	TKS4_WT_T	5576.39	7440.42	0.416052	5576.39	7440.42	0.416053	0.12843	0.86225	0.0643668	0.999503	lncRNA	chr7	27168619-27171915	+	ENSG00000253187.2
XLOC_048211	XLOC_048211	HOXA11-AS	8.79001	chr7:27185407-27189293	TKS4_WT	TKS4_WT_T	774.14	842.187	0.121547	774.14	842.187	0.121546	0.0826456	0.9034	0.0441199	0.999503	lncRNA	chr7	27184507-27189298	+	ENSG00000240990.10
XLOC_048209	XLOC_048209	HOXA-AS3	113.506	chr7:27106189-27156675	TKS4_WT	TKS4_WT_T	711.651	1519.42	1.09428	711.651	1519.42	1.09428	0.214347	0.6182	0.208871	0.999503	lncRNA	chr7	27129977-27155928	+	ENSG00000254369.6
XLOC_021232	XLOC_021232	HOXB-AS1	-19.3804	chr17:48542654-48590241	TKS4_WT	TKS4_WT_T	105.872	85.3536	-0.3108	105.872	85.3536	-0.310797	0	1	0	1	lncRNA	chr17	48543551-48551250	+	ENSG00000230148.8
XLOC_021233	XLOC_021233	HOXB-AS2	-99.8876	chr17:48542654-48590241	TKS4_WT	TKS4_WT_T	88.9564	0		88.9564	0.1	-9.79695		0.1924	0.715795	0.999503	lncRNA	chr17	48557262-48560333	+	ENSG00000239552.2
XLOC_021234	XLOC_021234	HOXB-AS3	-4.84731	chr17:48590419-48606414	TKS4_WT	TKS4_WT_T	177.913	169.289	-0.0716861	177.913	169.289	-0.0716837	-0.0160924	0.92815	0.0323818	0.999503	lncRNA	chr17	48549630-48606414	+	ENSG00000233101.10
XLOC_021235	XLOC_021235	HOXB-AS4	73.0408	chr17:48628697-48647513	TKS4_WT	TKS4_WT_T	31.2442	54.0652	0.791113	31.2442	54.0652	0.791112	0	1	0	1	lncRNA	chr17	48628675-48634932	+	ENSG00000242207.1
XLOC_011899	XLOC_011899	HOXC13-AS	-69.6464	chr12:53935327-53946544	TKS4_WT	TKS4_WT_T	93.7326	28.4512	-1.72006	93.7326	28.4512	-1.72006	0	1	0	1	lncRNA	chr12	53935328-53939643	-	ENSG00000249641.2
XLOC_011904	XLOC_011904	HOXC-AS1	-13.3066	chr12:53999021-54000010	TKS4_WT	TKS4_WT_T	346.273	300.196	-0.206008	346.273	300.196	-0.206005	-0.110563	0.8713	0.0598323	0.999503	lncRNA	chr12	53999022-54000010	-	ENSG00000250451.5
XLOC_011903	XLOC_011903	HOXC-AS2	26932.6	chr12:53995207-53996785	TKS4_WT	TKS4_WT_T	0	27.0326		0.1	27.0326	8.07856	0	1	0	1	lncRNA	chr12	53993810-53996785	-	ENSG00000250133.2
XLOC_030821	XLOC_030821	HOXD-AS2	33.3621	chr2:176134840-176140391	TKS4_WT	TKS4_WT_T	784.091	1045.68	0.41535	784.091	1045.68	0.415348	0.22916	0.7403	0.130592	0.999503	lncRNA	chr2	176121611-176137098	-	ENSG00000237380.7
XLOC_056445	XLOC_056445	HS6ST2-AS1	28351.2	chrX:132626011-132961370	TKS4_WT	TKS4_WT_T	0	28.4512		0.1	28.4512	8.15235	0	1	0	1	lncRNA	chrX	132667642-132669888	+	ENSG00000235849.1
XLOC_022294	XLOC_022294	HSD17B1-AS1	-4.07969	chr17:42552435-42555214	TKS4_WT	TKS4_WT_T	13572.1	13018.4	-0.0600904	13572.1	13018.4	-0.0600918	-0.0515833	0.942	0.0259491	0.999503	lncRNA	chr17	42552436-42554748	-	ENSG00000266962.2
XLOC_033345	XLOC_033345	HSF2BP,LINC00313	194.859	chr21:43453986-43659499	TKS4_WT	TKS4_WT_T	271.645	800.969	1.56002	271.645	800.969	1.56002	0.692124	0.1257	0.900665	0.999503	protein_coding,lncRNA
XLOC_045707	XLOC_045707	HYMAI,PLAGL1	-37.4401	chr6:143940299-144064599	TKS4_WT	TKS4_WT_T	35225.6	22037.1	-0.67669	35225.6	22037.1	-0.67669	-0.737039	0.39895	0.399082	0.999503	lncRNA,protein_coding
XLOC_004716	XLOC_004716	IBA57-DT	73.0408	chr1:228164085-228165512	TKS4_WT	TKS4_WT_T	31.2442	54.0652	0.791113	31.2442	54.0652	0.791112	0	1	0	1	lncRNA	chr1	228164086-228165512	-	ENSG00000203684.5
XLOC_029489	XLOC_029489	ID2-AS1	201.753	chr2:8670983-8681863	TKS4_WT	TKS4_WT_T	860.907	2597.81	1.59337	860.907	2597.81	1.59337	1.19255	0.1282	0.892112	0.999503	lncRNA	chr2	8666636-8681864	-	ENSG00000235092.7
XLOC_029128	XLOC_029128	IDH1-AS1	156.902	chr2:208255232-208256194	TKS4_WT	TKS4_WT_T	84.1803	216.261	1.36122	84.1803	216.261	1.36122	0.765886	0.43655	0.359966	0.999503	lncRNA	chr2	208255214-208256181	+	ENSG00000231908.2
XLOC_004961	XLOC_004961	IDI2-AS1	-55.3807	chr10:988433-1132372	TKS4_WT	TKS4_WT_T	860.907	384.131	-1.16426	860.907	384.131	-1.16426	-0.0596926	0.4819	0.317043	0.999503	lncRNA	chr10	1022630-1045425	+	ENSG00000232656.9
XLOC_043417	XLOC_043417	IER3-AS1	240.208	chr6:30742962-30744547	TKS4_WT	TKS4_WT_T	2161.42	7353.33	1.76642	2161.42	7353.33	1.76642	0.124712	0.30365	0.517627	0.999503	lncRNA	chr6	30742816-30743638	+	ENSG00000272273.2
XLOC_054455	XLOC_054455	IFT74-AS1	40.5211	chr9:26903371-27066134	TKS4_WT	TKS4_WT_T	57.7122	81.0978	0.490786	57.7122	81.0978	0.490786	0.021904	0.77365	0.111455	0.999503	lncRNA	chr9	26955780-26956295	-	ENSG00000234676.1
XLOC_007180	XLOC_007180	IGF2-AS	-9.58763	chr11:2129111-2161209	TKS4_WT	TKS4_WT_T	218.709	197.74	-0.145412	218.709	197.74	-0.145408	-0.0248332	0.8993	0.0460954	0.999503	lncRNA	chr11	2140501-2148666	+	ENSG00000099869.8
XLOC_036058	XLOC_036058	IGF2BP2-AS1	-8.93926	chr3:185643129-185825046	TKS4_WT	TKS4_WT_T	31.2442	28.4512	-0.135099	31.2442	28.4512	-0.135099	0	1	0	1	lncRNA	chr3	185712528-185729787	+	ENSG00000163915.7
XLOC_038221	XLOC_038221	IGFBP7-AS1	28351.2	chr4:56978895-57205299	TKS4_WT	TKS4_WT_T	0	28.4512		0.1	28.4512	8.15235	0	1	0	1	lncRNA	chr4	57109762-57207459	+	ENSG00000245067.8
XLOC_037316	XLOC_037316	IL12A-AS1	-99.6799	chr3:159913399-160207092	TKS4_WT	TKS4_WT_T	31.2442	0		31.2442	0.1	-8.28744	0	1	0	1	lncRNA	chr3	159902045-160225299	-	ENSG00000244040.7
XLOC_037134	XLOC_037134	IL20RB-AS1	91.8996	chr3:136862207-137011085	TKS4_WT	TKS4_WT_T	88.9564	170.707	0.940353	88.9564	170.707	0.940352	0.0973798	0.7211	0.142005	0.999503	lncRNA	chr3	136959125-136982196	-	ENSG00000249407.1
XLOC_038637	XLOC_038637	IL21-AS1	-13.4796	chr4:122610107-122689156	TKS4_WT	TKS4_WT_T	62.4884	54.0652	-0.208887	62.4884	54.0652	-0.208888	0	1	0	1	lncRNA	chr4	122618983-122689156	+	ENSG00000227145.2
XLOC_019716	XLOC_019716	IL21R-AS1	82.1215	chr16:27402161-27453393	TKS4_WT	TKS4_WT_T	31.2442	56.9024	0.864901	31.2442	56.9024	0.864901	0	1	0	1	lncRNA	chr16	27447669-27453393	-	ENSG00000259954.1
XLOC_049495	XLOC_049495	IL6-AS1	82416.4	chr7:22725394-22732002	TKS4_WT	TKS4_WT_T	0	82.5164		0.1	82.5164	9.68854		0.16695	0.777414	0.999503	lncRNA	chr7	22725395-22727620	-	ENSG00000179428.2
XLOC_003964	XLOC_003964	IL6R-AS1	-8.93926	chr1:154402320-154548147	TKS4_WT	TKS4_WT_T	62.4884	56.9024	-0.135099	62.4884	56.9024	-0.135099	0	1	0	1	lncRNA	chr1	154402328-154406564	-	ENSG00000228013.1
XLOC_025705	XLOC_025705	ILF3-DT	76.7578	chr19:10651861-10653872	TKS4_WT	TKS4_WT_T	8348.77	14757.1	0.821775	8348.77	14757.1	0.821774	0.76395	0.28115	0.551062	0.999503	lncRNA	chr19	10651862-10653844	-	ENSG00000267100.1
XLOC_043530	XLOC_043530	ILRUN-AS1	96.2083	chr6:34587287-34697471	TKS4_WT	TKS4_WT_T	1371.16	2690.33	0.972384	1371.16	2690.33	0.972386	0.16491	0.67095	0.17331	0.999503	lncRNA	chr6	34696317-34697478	+	ENSG00000272288.7
XLOC_055837	XLOC_055837	INE1,UBA1	2.66032	chrX:47190846-47229997	TKS4_WT	TKS4_WT_T	271095	278307	0.0378771	271095	278307	0.0378787	0.0297212	0.968	0.0141246	0.999503	lncRNA,protein_coding
XLOC_056748	XLOC_056748	INE2	103.395	chrX:15627317-15788411	TKS4_WT	TKS4_WT_T	93.7326	190.647	1.02428	93.7326	190.647	1.02428	0.152251	0.65115	0.186319	0.999503	lncRNA	chrX	15785716-15787589	-	ENSG00000281371.1
XLOC_001194	XLOC_001194	INKA2-AS1	11.752	chr1:111722063-111755797	TKS4_WT	TKS4_WT_T	173.137	193.484	0.160303	173.137	193.484	0.1603	0.0266345	0.9268	0.033014	0.999503	lncRNA	chr1	111739579-111747798	+	ENSG00000227811.3
XLOC_050553	XLOC_050553	INSIG1-DT	46.4045	chr7:155288608-155297724	TKS4_WT	TKS4_WT_T	2000.82	2929.29	0.549958	2000.82	2929.29	0.54996	0.460939	0.48585	0.313498	0.999503	lncRNA	chr7	155295918-155297541	-	ENSG00000273117.1
XLOC_016832	XLOC_016832	INSYN1-AS1	28351.2	chr15:73768085-73769802	TKS4_WT	TKS4_WT_T	0	28.4512		0.1	28.4512	8.15235	0	1	0	1	lncRNA	chr15	73752317-73770613	+	ENSG00000260469.3
XLOC_013017	XLOC_013017	INTS6-AS1	-20.6698	chr13:51453344-51454716	TKS4_WT	TKS4_WT_T	945.088	749.74	-0.334057	945.088	749.74	-0.334058	-0.233217	0.75795	0.120359	0.999503	lncRNA	chr13	51452364-51554678	+	ENSG00000236778.8
XLOC_057536	XLOC_057536	INTS6L-AS1	28351.2	chrX:135520082-135582537	TKS4_WT	TKS4_WT_T	0	28.4512		0.1	28.4512	8.15235	0	1	0	1	lncRNA	chrX	135520083-135520674	-	ENSG00000225235.1
XLOC_004432	XLOC_004432	IPO9-AS1	-39.8465	chr1:201648321-201884291	TKS4_WT	TKS4_WT_T	141.893	85.3536	-0.733275	141.893	85.3536	-0.73328	-0.0287475	0.7296	0.136915	0.999503	lncRNA	chr1	201688259-201829559	-	ENSG00000231871.5
XLOC_016382	XLOC_016382	IPW,PWAR4,PWARSN,SNHG14,SNORD115-1,SNORD115-10,SNORD115-11,SNORD115-12,SNORD115-13,SNORD115-14,SNORD115-15,SNORD115-16,SNORD115-17,SNORD115-18,SNORD115-19,SNORD115-2,SNORD115-20,SNORD115-21,SNORD115-22,SNORD115-24,SNORD115-25,SNORD115-26,SNORD115-27,SNORD115-28,SNORD115-29,SNORD115-3,SNORD115-30,SNORD115-31,SNORD115-32,SNORD115-33,SNORD115-34,SNORD115-35,SNORD115-36,SNORD115-37,SNORD115-38,SNORD1…	-65.9557	chr15:24823607-25439381	TKS4_WT	TKS4_WT_T	79.4041	27.0326	-1.55451	79.4041	27.0326	-1.55451	0	1	0	1	-,-,-,lncRNA,snoRNA,snoRNA,snoRNA,snoRNA,snoRNA,snoRNA,snoRNA,snoRNA,snoRNA,snoRNA,snoRNA,snoRNA,snoRNA,snoRNA,snoRNA,snoRNA,snoRNA,snoRNA,snoRNA,snoRNA,snoRNA,snoRNA,snoRNA,snoRNA,snoRNA,snoRNA,snoRNA,snoRNA,snoRNA,snoRNA,snoRNA,snoRNA,snoRNA,snoRNA,snoRNA,snoRNA,snoRNA,snoRNA,snoRNA,snoRNA,snoRNA,snoRNA,snoRNA,snoRNA,snoRNA,snoRNA,-,snoRNA,snoRNA,snoRNA,snoRNA,snoRNA,snoRNA,snoRNA,snoRNA,snoRNA…
XLOC_017648	XLOC_017648	IQCH-AS1	29.3176	chr15:67200666-67530146	TKS4_WT	TKS4_WT_T	6170.83	7979.97	0.370919	6170.83	7979.97	0.370919	0.104811	0.7591	0.119701	0.999503	lncRNA	chr15	67290636-67521844	-	ENSG00000259673.6
XLOC_007323	XLOC_007323	IRAG1-AS1	-38.1595	chr11:10541235-10693755	TKS4_WT	TKS4_WT_T	533.738	330.066	-0.69338	533.738	330.066	-0.693377	-0.135376	0.6785	0.16845	0.999503	lncRNA	chr11	10541258-10599939	+	ENSG00000177112.9
XLOC_017963	XLOC_017963	IRAIN	-0.305643	chr15:98645862-98964530	TKS4_WT	TKS4_WT_T	762	759.671	-0.00441707	762	759.671	-0.00441625	-0.000600297	0.9816	0.00806545	0.999503	lncRNA	chr15	98645118-98647389	-	ENSG00000259424.2
XLOC_041104	XLOC_041104	IRF1-AS1	21.8156	chr5:132410928-132476044	TKS4_WT	TKS4_WT_T	204.381	248.968	0.284699	204.381	248.968	0.284699	0.134912	0.84445	0.0734261	0.999503	lncRNA	chr5	132410636-132488702	+	ENSG00000197536.11
XLOC_040356	XLOC_040356	IRX4-AS1	-11.5539	chr5:1877412-1887179	TKS4_WT	TKS4_WT_T	3064.32	2710.27	-0.177129	3064.32	2710.27	-0.17713	-0.0686545	0.92935	0.0318207	0.999503	lncRNA	chr5	1883315-1884758	+	ENSG00000249116.2
XLOC_032123	XLOC_032123	ISM1-AS1	-99.9618	chr20:13008971-13638932	TKS4_WT	TKS4_WT_T	262.093	0		262.093	0.1	-11.3559		0.14985	0.824343	0.999503	lncRNA	chr20	13237801-13239674	-	ENSG00000226263.1
XLOC_018938	XLOC_018938	ITFG1-AS1	83835	chr16:47144067-47461246	TKS4_WT	TKS4_WT_T	0	83.935		0.1	83.935	9.71313		0.1819	0.740167	0.999503	lncRNA	chr16	47144323-47162749	+	ENSG00000260281.6
XLOC_011371	XLOC_011371	ITFG2-AS1	9.90855	chr12:2740074-2889524	TKS4_WT	TKS4_WT_T	151.445	166.451	0.136309	151.445	166.451	0.136304	0.00264795	0.9175	0.0373939	0.999503	lncRNA	chr12	2796877-2812902	-	ENSG00000258325.2
XLOC_036410	XLOC_036410	ITGA9-AS1,NDUFAF4P3	-99.8933	chr3:37452140-37861780	TKS4_WT	TKS4_WT_T	93.7326	0		93.7326	0.1	-9.87241	0	1	0	1	lncRNA,processed_pseudogene
XLOC_005216	XLOC_005216	ITGB1-DT	135.135	chr10:32958458-33116807	TKS4_WT	TKS4_WT_T	2204.81	5184.27	1.23349	2204.81	5184.27	1.23349	0.938665	0.2096	0.678609	0.999503	lncRNA	chr10	32958437-33082409	+	ENSG00000229656.8
XLOC_032998	XLOC_032998	ITGB2-AS1	97.194	chr21:44885948-44929680	TKS4_WT	TKS4_WT_T	57.7122	113.805	0.979612	57.7122	113.805	0.979616	0.258053	0.44275	0.353841	0.999503	lncRNA	chr21	44921051-44929680	+	ENSG00000227039.7
XLOC_049484	XLOC_049484	ITGB8-AS1	-71.7766	chr7:20328300-20415754	TKS4_WT	TKS4_WT_T	579.71	163.614	-1.82503	579.71	163.614	-1.82504	-0.224916	0.3308	0.480434	0.999503	lncRNA	chr7	20328296-20331781	-	ENSG00000271133.6
XLOC_014760	XLOC_014760	ITPK1-AS1	82.1218	chr14:92936913-93115925	TKS4_WT	TKS4_WT_T	62.4884	113.805	0.864901	62.4884	113.805	0.864904	0	1	0	1	lncRNA	chr14	93067452-93072152	+	ENSG00000258730.1
XLOC_004696	XLOC_004696	ITPKB-IT1	-84.8232	chr1:226631689-226739296	TKS4_WT	TKS4_WT_T	187.465	28.4512	-2.72006	187.465	28.4512	-2.72006	0	1	0	1	lncRNA	chr1	226656080-226675089	-	ENSG00000228382.2
XLOC_036206	XLOC_036206	ITPR1-DT	-8.93926	chr3:4490316-4493163	TKS4_WT	TKS4_WT_T	31.2442	28.4512	-0.135099	31.2442	28.4512	-0.135099	0	1	0	1	lncRNA	chr3	4490317-4493201	-	ENSG00000231249.2
XLOC_005800	XLOC_005800	ITPRIP-AS1	-99.6799	chr10:104309699-104338465	TKS4_WT	TKS4_WT_T	31.2442	0		31.2442	0.1	-8.28744	0	1	0	1	lncRNA	chr10	104323369-104327004	+	ENSG00000228261.1
XLOC_005426	XLOC_005426	JMJD1C-AS1	-22.8466	chr10:63167220-63625128	TKS4_WT	TKS4_WT_T	2269.88	1751.29	-0.374202	2269.88	1751.29	-0.374198	-0.0347716	0.83085	0.0804774	0.999503	lncRNA	chr10	63465229-63466563	+	ENSG00000272767.1
XLOC_056092	XLOC_056092	JPX	100.667	chrX:73944323-74293574	TKS4_WT	TKS4_WT_T	974.143	1954.78	1.0048	974.143	1954.78	1.0048	0.376779	0.63415	0.197808	0.999503	lncRNA
XLOC_021196	XLOC_021196	KANSL1-AS1	-88.7645	chr17:45843355-46225374	TKS4_WT	TKS4_WT_T	481.201	54.0652	-3.15387	481.201	54.0652	-3.15387	-0.346463	0.4545	0.342466	0.999503	lncRNA	chr17	46193568-46197842	+	ENSG00000214401.5
XLOC_029139	XLOC_029139	KANSL1L-AS1	-1.96373	chr2:210002564-210171409	TKS4_WT	TKS4_WT_T	1332.16	1306	-0.028613	1332.16	1306	-0.0286125	-0.00371607	0.98615	0.00605702	0.999503	lncRNA	chr2	210030572-210064356	+	ENSG00000229127.2
XLOC_050730	XLOC_050730	KBTBD11,KBTBD11-OT1	-29.1596	chr8:1970717-2006943	TKS4_WT	TKS4_WT_T	12832.6	9090.67	-0.497356	12832.6	9090.67	-0.497355	-0.471396	0.49895	0.301943	0.999503	protein_coding,lncRNA
XLOC_004553	XLOC_004553	KCNH1-IT1	-99.6799	chr1:210678313-211134148	TKS4_WT	TKS4_WT_T	31.2442	0		31.2442	0.1	-8.28744	0	1	0	1	lncRNA	chr1	211132588-211133374	-	ENSG00000234233.1
XLOC_005766	XLOC_005766	KCNIP2-AS1	374.449	chr10:101819067-101843920	TKS4_WT	TKS4_WT_T	110.648	524.968	2.24625	110.648	524.968	2.24625	0.374042	0.60375	0.219143	0.999503	lncRNA	chr10	101818800-101828885	+	ENSG00000226009.2
XLOC_037422	XLOC_037422	KCNMB2-AS1	11.2182	chr3:178525466-178860405	TKS4_WT	TKS4_WT_T	1748.68	1944.85	0.153391	1748.68	1944.85	0.153393	0.113787	0.87765	0.0566786	0.999503	lncRNA	chr3	178526505-178937352	-	ENSG00000237978.6
XLOC_008608	XLOC_008608	KCNQ1OT1	-39.7646	chr11:2445007-2861569	TKS4_WT	TKS4_WT_T	84068.2	50638.8	-0.731316	84068.2	50638.8	-0.731317	-0.683371	0.33825	0.470762	0.999503	lncRNA	chr11	2608328-2699994	-	ENSG00000269821.1
XLOC_031969	XLOC_031969	KCNQ2-AS1	-77.2349	chr20:63400207-63472655	TKS4_WT	TKS4_WT_T	124.977	28.4512	-2.1351	124.977	28.4512	-2.1351	0	1	0	1	lncRNA	chr20	63448051-63449329	+	ENSG00000226390.1
XLOC_008080	XLOC_008080	KCTD21-AS1	54.2793	chr11:78139792-78188626	TKS4_WT	TKS4_WT_T	110.648	170.707	0.625542	110.648	170.707	0.625545	0.102773	0.7836	0.105906	0.999503	lncRNA	chr11	78139771-78175323	+	ENSG00000246174.9
XLOC_011214	XLOC_011214	KDM2B-DT	-99.6799	chr12:121400095-121596184	TKS4_WT	TKS4_WT_T	31.2442	0		31.2442	0.1	-8.28744	0	1	0	1	lncRNA	chr12	121580792-121593504	+	ENSG00000256742.1
XLOC_003062	XLOC_003062	KDM4A-AS1	77.997	chr1:43650148-43707341	TKS4_WT	TKS4_WT_T	293.337	522.131	0.831851	293.337	522.131	0.831853	0.0772206	0.6854	0.164056	0.999503	lncRNA	chr1	43685123-43708138	-	ENSG00000236200.7
XLOC_049116	XLOC_049116	KDM7A-DT	68.2031	chr7:140177260-140179640	TKS4_WT	TKS4_WT_T	365.378	614.577	0.750205	365.378	614.577	0.750204	0.432828	0.5492	0.260269	0.999503	lncRNA	chr7	140177184-140179640	+	ENSG00000260231.2
XLOC_004312	XLOC_004312	KIAA1614-AS1	-53.0322	chr1:180912896-180954887	TKS4_WT	TKS4_WT_T	1538.73	722.708	-1.09025	1538.73	722.708	-1.09026	-0.434596	0.51885	0.284958	0.999503	lncRNA	chr1	180949699-180954887	-	ENSG00000232586.1
XLOC_034117	XLOC_034117	KIAA1671-AS1	28351.2	chr22:24952715-25207617	TKS4_WT	TKS4_WT_T	0	28.4512		0.1	28.4512	8.15235	0	1	0	1	lncRNA	chr22	25102433-25112692	-	ENSG00000203280.4
XLOC_030992	XLOC_030992	KIAA2012-AS1	8.1503	chr2:202073254-202238597	TKS4_WT	TKS4_WT_T	124.977	135.163	0.113041	124.977	135.163	0.113038	0.00744231	0.8876	0.0517827	0.999503	lncRNA	chr2	202075410-202117062	-	ENSG00000222035.4
XLOC_030627	XLOC_030627	KIF5C-AS1	-75.8504	chr2:148875226-149026759	TKS4_WT	TKS4_WT_T	235.625	56.9024	-2.04993	235.625	56.9024	-2.04993	-0.3663	0.2564	0.591082	0.999503	lncRNA	chr2	148866470-148888823	-	ENSG00000231079.7
XLOC_035092	XLOC_035092	KIF9-AS1	67.6937	chr3:47164369-47282847	TKS4_WT	TKS4_WT_T	1245.39	2088.44	0.745831	1245.39	2088.44	0.745828	0.229649	0.72635	0.138854	0.999503	lncRNA	chr3	47164186-47246601	+	ENSG00000227398.5
XLOC_001610	XLOC_001610	KIRREL1-IT1	-9.49191	chr1:157993612-158100262	TKS4_WT	TKS4_WT_T	649.163	587.545	-0.143882	649.163	587.545	-0.143881	-0.0170361	0.9348	0.0292813	0.999503	lncRNA	chr1	158025550-158031166	+	ENSG00000226520.1
XLOC_045077	XLOC_045077	KLC4-AS1	-64.1691	chr6:43054028-43076230	TKS4_WT	TKS4_WT_T	79.4041	28.4512	-1.48073	79.4041	28.4512	-1.48072	0	1	0	1	lncRNA	chr6	43074331-43074739	-	ENSG00000272170.1
XLOC_039276	XLOC_039276	KLF3-AS1	104.524	chr4:38612700-38701517	TKS4_WT	TKS4_WT_T	367.965	752.578	1.03227	367.965	752.578	1.03227	0.118291	0.5809	0.235899	0.999503	lncRNA	chr4	38602438-38664926	-	ENSG00000231160.11
XLOC_034460	XLOC_034460	KLHDC7B-DT	28351.2	chr22:50541382-50544778	TKS4_WT	TKS4_WT_T	0	28.4512		0.1	28.4512	8.15235	0	1	0	1	lncRNA	chr22	50542305-50542906	-	ENSG00000272666.1
XLOC_049502	XLOC_049502	KLHL7-DT	-27.4428	chr7:23101227-23105703	TKS4_WT	TKS4_WT_T	827.474	600.392	-0.462811	827.474	600.392	-0.462809	-0.256651	0.70705	0.15055	0.999503	lncRNA	chr7	23100214-23105703	-	ENSG00000230658.2
XLOC_010278	XLOC_010278	KLRK1-AS1	-59.9805	chr12:10363768-10410146	TKS4_WT	TKS4_WT_T	831.852	332.903	-1.32123	831.852	332.903	-1.32123	-0.444374	0.42695	0.369623	0.999503	lncRNA	chr12	10363638-10398506	+	ENSG00000245648.2
XLOC_050183	XLOC_050183	KMT2E-AS1	-6.17206	chr7:104940948-105399363	TKS4_WT	TKS4_WT_T	8189.16	7683.72	-0.091912	8189.16	7683.72	-0.0919105	-0.0272675	0.9531	0.0208615	0.999503	lncRNA	chr7	105013281-105014321	-	ENSG00000239569.4
XLOC_022412	XLOC_022412	KPNB1-DT	1.76593	chr17:47522932-47685505	TKS4_WT	TKS4_WT_T	1539.13	1566.31	0.025262	1539.13	1566.31	0.0252547	0.00110508	0.9873	0.00555086	0.999503	lncRNA	chr17	47603860-47649449	-	ENSG00000263766.6
XLOC_011854	XLOC_011854	KRT7-AS	79.851	chr12:52228706-52258508	TKS4_WT	TKS4_WT_T	62.4884	112.386	0.846805	62.4884	112.386	0.846802	0.0864541	0.7178	0.143997	0.999503	lncRNA	chr12	52245048-52247448	-	ENSG00000257671.1
XLOC_007165	XLOC_007165	KRTAP5-AS1	-99.9168	chr11:1554050-1599184	TKS4_WT	TKS4_WT_T	120.201	0		120.201	0.1	-10.2312		0.1548	0.810229	0.999503	lncRNA	chr11	1571353-1599184	+	ENSG00000233930.4
XLOC_015384	XLOC_015384	KTN1-AS1	1.0375	chr14:55576156-55580092	TKS4_WT	TKS4_WT_T	1402.41	1416.96	0.0148977	1402.41	1416.96	0.0148908	0.0104191	0.98755	0.00544091	0.999503	lncRNA	chr14	55496786-55580888	-	ENSG00000186615.12
XLOC_051281	XLOC_051281	LACTB2-AS1	190547	chr8:70608576-70669185	TKS4_WT	TKS4_WT_T	0	190.647		0.1	190.647	10.8967		0.1444	0.840433	0.999503	lncRNA	chr8	70608577-70663279	+	ENSG00000246366.6
XLOC_031936	XLOC_031936	LAMA5-AS1	-75.3507	chr20:62309059-62367318	TKS4_WT	TKS4_WT_T	115.424	28.4512	-2.02039	115.424	28.4512	-2.02038	-0.253616	0.5487	0.260665	0.999503	lncRNA	chr20	62352988-62356480	+	ENSG00000228812.8
XLOC_001175	XLOC_001175	LAMTOR5-AS1	-34.0895	chr1:110401252-110416274	TKS4_WT	TKS4_WT_T	252.541	166.451	-0.601416	252.541	166.451	-0.60142	-0.0449198	0.7419	0.129655	0.999503	lncRNA	chr1	110347116-110443817	+	ENSG00000224699.10
XLOC_029142	XLOC_029142	LANCL1-AS1	-99.6222	chr2:210324711-210477618	TKS4_WT	TKS4_WT_T	26.468	0		26.468	0.1	-8.04811	0	1	0	1	lncRNA	chr2	210324759-210469246	+	ENSG00000234281.5
XLOC_027729	XLOC_027729	LAPTM4A-DT	211.759	chr2:20051951-20118023	TKS4_WT	TKS4_WT_T	26.468	82.5164	1.64043	26.468	82.5164	1.64043	0.804349	0.4078	0.389553	0.999503	lncRNA	chr2	20052114-20054501	+	ENSG00000223734.3
XLOC_036482	XLOC_036482	LARS2-AS1	2.13314	chr3:45388563-45549407	TKS4_WT	TKS4_WT_T	26.468	27.0326	0.0304486	26.468	27.0326	0.0304511	0	1	0	1	lncRNA	chr3	45483974-45509545	-	ENSG00000232455.2
XLOC_005758	XLOC_005758	LBX1-AS1	135063	chr10:101229593-101238859	TKS4_WT	TKS4_WT_T	0	135.163		0.1	135.163	10.4005	0	1	0	1	lncRNA	chr10	101229577-101270148	+	ENSG00000227128.5
XLOC_028154	XLOC_028154	LBX2-AS1	-23.9963	chr2:74497516-74507695	TKS4_WT	TKS4_WT_T	1319.62	1002.96	-0.395852	1319.62	1002.96	-0.395858	-0.099358	0.87505	0.0579671	0.999503	lncRNA	chr2	74502552-74505091	+	ENSG00000257702.4
XLOC_045291	XLOC_045291	LCAL1	53965.2	chr6:79307668-79313384	TKS4_WT	TKS4_WT_T	0	54.0652		0.1	54.0652	9.07856	0	1	0	1	lncRNA	chr6	79307669-79313384	-	ENSG00000286042.1
XLOC_019697	XLOC_019697	LCMT1-AS1	-10.0423	chr16:25100563-25111555	TKS4_WT	TKS4_WT_T	120.201	108.13	-0.152672	120.201	108.13	-0.152682	-0.0910548	0.49075	0.30914	0.999503	lncRNA	chr16	25085168-25111555	-	ENSG00000260448.7
XLOC_019698	XLOC_019698	LCMT1-AS2	-39.2928	chr16:25111701-25178231	TKS4_WT	TKS4_WT_T	93.7326	56.9024	-0.720061	93.7326	56.9024	-0.720061	0	1	0	1	lncRNA	chr16	25140577-25149032	-	ENSG00000260034.1
XLOC_002065	XLOC_002065	LEMD1-DT	-99.84	chr1:205373251-205469024	TKS4_WT	TKS4_WT_T	62.4884	0		62.4884	0.1	-9.28744	0	1	0	1	lncRNA	chr1	205455929-205469024	+	ENSG00000224717.1
XLOC_026508	XLOC_026508	LENG8-AS1	-39.8019	chr19:54444815-54463778	TKS4_WT	TKS4_WT_T	1250.17	752.578	-0.732207	1250.17	752.578	-0.732211	-0.0721063	0.69085	0.160616	0.999503	lncRNA	chr19	54444807-54449430	-	ENSG00000226696.7
XLOC_054673	XLOC_054673	LERFS	-13.8906	chr9:62857208-62899777	TKS4_WT	TKS4_WT_T	1082.2	931.876	-0.215763	1082.2	931.876	-0.215757	-0.110713	0.8814	0.054827	0.999503	lncRNA	chr9	62856999-62898095	-	ENSG00000234665.9
XLOC_004828	XLOC_004828	LGALS8-AS1	38.0884	chr1:236518213-236604516	TKS4_WT	TKS4_WT_T	302.89	418.256	0.465595	302.89	418.256	0.465592	0.0175747	0.82705	0.0824682	0.999503	lncRNA	chr1	236523052-236524508	-	ENSG00000223776.5
XLOC_029916	XLOC_029916	LGALSL-DT	52.0236	chr2:64390955-64461381	TKS4_WT	TKS4_WT_T	418.314	635.936	0.604295	418.314	635.936	0.604295	0.094476	0.65445	0.184124	0.999503	lncRNA	chr2	64395220-64453967	-	ENSG00000223935.3
XLOC_050181	XLOC_050181	LHFPL3-AS2	28351.2	chr7:104328602-104926645	TKS4_WT	TKS4_WT_T	0	28.4512		0.1	28.4512	8.15235	0	1	0	1	lncRNA	chr7	104894628-104926645	-	ENSG00000225329.3
XLOC_022143	XLOC_022143	LHX1-DT	28351.2	chr17:36861673-36936661	TKS4_WT	TKS4_WT_T	0	28.4512		0.1	28.4512	8.15235	0	1	0	1	lncRNA	chr17	36861674-36936670	-	ENSG00000277268.2
XLOC_011147	XLOC_011147	LHX5-AS1	28351.2	chr12:113472002-113480481	TKS4_WT	TKS4_WT_T	0	28.4512		0.1	28.4512	8.15235	0	1	0	1	lncRNA	chr12	113471981-113480636	+	ENSG00000257935.3
XLOC_033663	XLOC_033663	LIF-AS1	53.1994	chr22:30239193-30257487	TKS4_WT	TKS4_WT_T	52.9361	81.0978	0.615411	52.9361	81.0978	0.615411	0	1	0	1	lncRNA	chr22	30239194-30240538	+	ENSG00000232530.1
XLOC_033664	XLOC_033664	LIF-AS2	-55.8358	chr22:30239193-30257487	TKS4_WT	TKS4_WT_T	190.052	83.935	-1.17905	190.052	83.935	-1.17905	-0.0569085	0.6226	0.205791	0.999503	lncRNA	chr22	30246205-30246998	+	ENSG00000268812.3
XLOC_040560	XLOC_040560	LIFR-AS1	1061.09	chr5:38474667-38671216	TKS4_WT	TKS4_WT_T	31.2442	362.773	3.53741	31.2442	362.773	3.53741	0.475256	0.2931	0.532984	0.999503	lncRNA	chr5	38556765-38671216	+	ENSG00000244968.7
XLOC_036483	XLOC_036483	LIMD1-AS1	21.149	chr3:45594104-45688882	TKS4_WT	TKS4_WT_T	555.43	672.898	0.276783	555.43	672.898	0.276783	0.0241284	0.87335	0.0588117	0.999503	lncRNA	chr3	45676369-45689200	-	ENSG00000230530.2
XLOC_016988	XLOC_016988	LINC00052	26932.6	chr15:87576928-87579686	TKS4_WT	TKS4_WT_T	0	27.0326		0.1	27.0326	8.07856	0	1	0	1	lncRNA	chr15	87576929-87579866	+	ENSG00000259527.2
XLOC_054952	XLOC_054952	LINC00092	28351.2	chr9:95806087-96041092	TKS4_WT	TKS4_WT_T	0	28.4512		0.1	28.4512	8.15235	0	1	0	1	lncRNA	chr9	96019724-96027993	-	ENSG00000225194.4
XLOC_056677	XLOC_056677	LINC00102	332.602	chrX:2609264-2657229	TKS4_WT	TKS4_WT_T	31.2442	135.163	2.11304	31.2442	135.163	2.11304	0	1	0	1	lncRNA	chrY	2612988-2615347	-	ENSG00000230542.6_PAR_Y
XLOC_055579	XLOC_055579	LINC00106	-99.6799	chrX:1397024-1399412	TKS4_WT	TKS4_WT_T	31.2442	0		31.2442	0.1	-8.28744	0	1	0	1	lncRNA	chrY	1396427-1399402	+	ENSG00000236871.7_PAR_Y
XLOC_002497	XLOC_002497	LINC00115	39.7551	chr1:826205-827522	TKS4_WT	TKS4_WT_T	591.451	826.583	0.482901	591.451	826.583	0.482901	0.331447	0.63835	0.194941	0.999503	lncRNA	chr1	826206-827522	-	ENSG00000225880.5
XLOC_033142	XLOC_033142	LINC00158	519.264	chr21:25385819-25431701	TKS4_WT	TKS4_WT_T	31.2442	193.484	2.63055	31.2442	193.484	2.63055	1.65646	0.1041	0.982549	0.999503	lncRNA	chr21	25385388-25431701	-	ENSG00000185433.11
XLOC_033381	XLOC_033381	LINC00163	-8.93926	chr21:44989863-44994086	TKS4_WT	TKS4_WT_T	31.2442	28.4512	-0.135099	31.2442	28.4512	-0.135099	0	1	0	1	lncRNA	chr21	44989864-44994086	-	ENSG00000234880.1
XLOC_011163	XLOC_011163	LINC00173	66.1034	chr12:116533421-116536513	TKS4_WT	TKS4_WT_T	2611.38	4337.59	0.732081	2611.38	4337.59	0.732081	0.619813	0.3744	0.426664	0.999503	lncRNA	chr12	116533422-116536518	+	ENSG00000196668.4
XLOC_049866	XLOC_049866	LINC00174	-29.0502	chr7:66376043-66400408	TKS4_WT	TKS4_WT_T	3059.74	2170.88	-0.495129	3059.74	2170.88	-0.495129	-0.349274	0.58265	0.234592	0.999503	lncRNA	chr7	66376044-66493566	-	ENSG00000179406.9
XLOC_032813	XLOC_032813	LINC00189	-99.6222	chr21:29193493-29288205	TKS4_WT	TKS4_WT_T	26.468	0		26.468	0.1	-8.04811	0	1	0	1	lncRNA	chr21	29193480-29288205	+	ENSG00000215533.8
XLOC_004963	XLOC_004963	LINC00200	-99.6799	chr10:1159767-1164672	TKS4_WT	TKS4_WT_T	31.2442	0		31.2442	0.1	-8.28744	0	1	0	1	lncRNA	chr10	1159768-1289426	+	ENSG00000229205.5
XLOC_033004	XLOC_033004	LINC00205	-4.95414	chr21:45288051-45297354	TKS4_WT	TKS4_WT_T	21751.5	20673.9	-0.0733043	21751.5	20673.9	-0.0733043	-0.0750989	0.9195	0.0364483	0.999503	lncRNA	chr21	45288035-45297806	+	ENSG00000223768.3
XLOC_014492	XLOC_014492	LINC00216	-40.8063	chr14:58244842-58298137	TKS4_WT	TKS4_WT_T	93.7326	55.4838	-0.756484	93.7326	55.4838	-0.756484	-0.0185288	0.7454	0.127611	0.999503	lncRNA	chr14	58288033-58289158	+	ENSG00000279636.2
XLOC_043998	XLOC_043998	LINC00222	-60.8974	chr6:108751653-108769942	TKS4_WT	TKS4_WT_T	141.893	55.4838	-1.35466	141.893	55.4838	-1.35466	-0.508605	0.47705	0.321436	0.999503	lncRNA	chr6	108751654-108769942	+	ENSG00000203801.8
XLOC_019377	XLOC_019377	LINC00235	97.5129	chr16:526846-527407	TKS4_WT	TKS4_WT_T	283.785	560.512	0.981948	283.785	560.512	0.981947	0.595422	0.3771	0.423543	0.999503	lncRNA	chr16	525155-527407	-	ENSG00000277142.1
XLOC_032180	XLOC_032180	LINC00237	26932.6	chr20:21087603-21106358	TKS4_WT	TKS4_WT_T	0	27.0326		0.1	27.0326	8.07856	0	1	0	1	lncRNA	chr20	21085576-21106514	-	ENSG00000225127.4
XLOC_014941	XLOC_014941	LINC00239	124.921	chr14:101632320-101732525	TKS4_WT	TKS4_WT_T	269.457	606.066	1.16942	269.457	606.066	1.16942	0.534752	0.447	0.349692	0.999503	lncRNA	chr14	101730437-101732522	+	ENSG00000258512.1
XLOC_043249	XLOC_043249	LINC00240	111.412	chr6:26956992-27023974	TKS4_WT	TKS4_WT_T	79.4041	167.87	1.08006	79.4041	167.87	1.08006	0.44981	0.63945	0.194193	0.999503	lncRNA	chr6	26956932-27059749	+	ENSG00000224843.8
XLOC_045894	XLOC_045894	LINC00242	47.8952	chr6:169788789-169802873	TKS4_WT	TKS4_WT_T	57.7122	85.3536	0.564574	57.7122	85.3536	0.564576	0.228636	0.44935	0.347415	0.999503	lncRNA	chr6	169788790-169799549	-	ENSG00000229214.2
XLOC_044863	XLOC_044863	LINC00243	-0.953347	chr6:30812865-30830659	TKS4_WT	TKS4_WT_T	1862.91	1845.15	-0.0138191	1862.91	1845.15	-0.0138199	-0.00958161	0.989	0.00480371	0.999503	lncRNA	chr6	30798211-30830659	-	ENSG00000214894.7
XLOC_048302	XLOC_048302	LINC00265	-26.8244	chr7:39733567-39794623	TKS4_WT	TKS4_WT_T	3007.6	2200.83	-0.450566	3007.6	2200.83	-0.450565	-0.338606	0.61305	0.212504	0.999503	lncRNA	chr7	39733430-39793092	+	ENSG00000188185.13
XLOC_031990	XLOC_031990	LINC00266-1,SEPTIN14P20	60.5637	chr20:64290384-64303354	TKS4_WT	TKS4_WT_T	84.1803	135.163	0.683146	84.1803	135.163	0.683146	0.238797	0.6794	0.167874	0.999503	lncRNA,-
XLOC_007464	XLOC_007464	LINC00294,TCP11L1	-17.2834	chr11:33039498-33079454	TKS4_WT	TKS4_WT_T	29173.1	24131	-0.27375	29173.1	24131	-0.273751	-0.266342	0.7391	0.131297	0.999503	lncRNA,protein_coding
XLOC_029486	XLOC_029486	LINC00299	85253.6	chr2:8007770-8328419	TKS4_WT	TKS4_WT_T	0	85.3536		0.1	85.3536	9.73731	0	1	0	1	lncRNA	chr2	7988683-8488284	-	ENSG00000236790.7
XLOC_019330	XLOC_019330	LINC00304	-47.2508	chr16:89093846-89163675	TKS4_WT	TKS4_WT_T	42730.5	22540	-0.922777	42730.5	22540	-0.922779	-0.990191	0.2228	0.652085	0.999503	lncRNA
XLOC_029911	XLOC_029911	LINC00309	108030	chr2:64185077-64205485	TKS4_WT	TKS4_WT_T	0	108.13		0.1	108.13	10.0786	0	1	0	1	lncRNA	chr2	64185078-64205485	-	ENSG00000230923.2
XLOC_032868	XLOC_032868	LINC00310	-58.9904	chr21:34180676-34189919	TKS4_WT	TKS4_WT_T	610.555	250.386	-1.28597	610.555	250.386	-1.28597	-0.814915	0.3546	0.450261	0.999503	lncRNA	chr21	34157724-34190244	+	ENSG00000227456.9
XLOC_019279	XLOC_019279	LINC00311	-44.7458	chr16:85169511-85688954	TKS4_WT	TKS4_WT_T	615.331	339.996	-0.855847	615.331	339.996	-0.855845	-0.0435797	0.76275	0.117618	0.999503	lncRNA	chr16	85282958-85285963	+	ENSG00000179219.5
XLOC_021810	XLOC_021810	LINC00324,TRD-GTC2-11,TRP-CGG1-3,TRW-CCA1-1	229.026	chr17:8220629-8224043	TKS4_WT	TKS4_WT_T	623.093	2050.14	1.7182	623.093	2050.14	1.7182	0.986605	0.1876	0.726767	0.999503	lncRNA,-,-,-
XLOC_044173	XLOC_044173	LINC00326	30.6163	chr6:133088079-133106578	TKS4_WT	TKS4_WT_T	3981.15	5200.03	0.385335	3981.15	5200.03	0.385335	0.268898	0.721	0.142065	0.999503	lncRNA	chr6	132954257-133107410	+	ENSG00000231023.8
XLOC_013632	XLOC_013632	LINC00330	83835	chr13:44799503-44809630	TKS4_WT	TKS4_WT_T	0	83.935		0.1	83.935	9.71313		0.06	1.22185	0.999503	lncRNA	chr13	44799503-44809630	-	ENSG00000235097.1
XLOC_044967	XLOC_044967	LINC00336	56802.4	chr6:33583698-33593338	TKS4_WT	TKS4_WT_T	0	56.9024		0.1	56.9024	9.15235	0	1	0	1	lncRNA	chr6	33586104-33593338	-	ENSG00000197251.4
XLOC_000318	XLOC_000318	LINC00339	-20.0164	chr1:22023993-22101360	TKS4_WT	TKS4_WT_T	5183.16	4145.68	-0.322222	5183.16	4145.68	-0.322223	-0.0341485	0.7743	0.111091	0.999503	lncRNA	chr1	22024558-22031223	+	ENSG00000218510.9
XLOC_030231	XLOC_030231	LINC00342	-58.5734	chr2:95807051-95826981	TKS4_WT	TKS4_WT_T	8819.22	3653.5	-1.27137	8819.22	3653.5	-1.27137	-1.09395	0.1133	0.94577	0.999503	lncRNA	chr2	95807052-95835003	-	ENSG00000232931.6
XLOC_013300	XLOC_013300	LINC00343	-99.6222	chr13:105706829-105761796	TKS4_WT	TKS4_WT_T	26.468	0		26.468	0.1	-8.04811	0	1	0	1	lncRNA	chr13	105702699-105797539	+	ENSG00000226620.8
XLOC_013512	XLOC_013512	LINC00365	104.266	chr13:30103177-30108875	TKS4_WT	TKS4_WT_T	26.468	54.0652	1.03045	26.468	54.0652	1.03045	0	1	0	1	lncRNA	chr13	30103178-30108895	-	ENSG00000224511.2
XLOC_013316	XLOC_013316	LINC00370	112286	chr13:109281972-109297687	TKS4_WT	TKS4_WT_T	0	112.386		0.1	112.386	10.1342		0.0041	2.38722	0.600191	lncRNA	chr13	109281973-109297690	+	ENSG00000223617.2
XLOC_013624	XLOC_013624	LINC00390	56802.4	chr13:44106090-44161257	TKS4_WT	TKS4_WT_T	0	56.9024		0.1	56.9024	9.15235	0	1	0	1	lncRNA	chr13	44094822-44147765	-	ENSG00000226519.3
XLOC_013488	XLOC_013488	LINC00412	-65.2062	chr13:27236281-27237257	TKS4_WT	TKS4_WT_T	396.622	138	-1.52309	396.622	138	-1.5231	-0.706189	0.382	0.417937	0.999503	lncRNA	chr13	27236282-27250711	-	ENSG00000234772.2
XLOC_013957	XLOC_013957	LINC00449	257.433	chr13:99499722-99501063	TKS4_WT	TKS4_WT_T	62.4884	223.354	1.83767	62.4884	223.354	1.83767	1.1615	0.236	0.627088	0.999503	lncRNA	chr13	99499727-99501052	-	ENSG00000203441.2
XLOC_013368	XLOC_013368	LINC00452	-99.8812	chr13:113895102-113921317	TKS4_WT	TKS4_WT_T	84.1803	0		84.1803	0.1	-9.71734		0.06495	1.18742	0.999503	lncRNA	chr13	113888306-113923512	+	ENSG00000229373.9
XLOC_013932	XLOC_013932	LINC00456	28351.2	chr13:97141833-97394120	TKS4_WT	TKS4_WT_T	0	28.4512		0.1	28.4512	8.15235	0	1	0	1	lncRNA	chr13	97168751-97187578	-	ENSG00000233124.2
XLOC_013301	XLOC_013301	LINC00460	-14.1506	chr13:106376563-106378595	TKS4_WT	TKS4_WT_T	2253.76	1934.84	-0.220122	2253.76	1934.84	-0.22012	-0.164112	0.80855	0.0922931	0.999503	lncRNA	chr13	106374477-106384315	+	ENSG00000233532.6
XLOC_042126	XLOC_042126	LINC00461,MIR9-2	-99.84	chr5:88538265-89467581	TKS4_WT	TKS4_WT_T	62.4884	0		62.4884	0.1	-9.28744	0	1	0	1	lncRNA,miRNA
XLOC_003247	XLOC_003247	LINC00466	211.903	chr1:63159082-63317257	TKS4_WT	TKS4_WT_T	62.4884	194.903	1.64109	62.4884	194.903	1.6411	1.03113	0.3922	0.406492	0.999503	lncRNA	chr1	63159083-63317274	-	ENSG00000224209.8
XLOC_002138	XLOC_002138	LINC00467	-48.1574	chr1:211382754-211432535	TKS4_WT	TKS4_WT_T	7234.13	3750.36	-0.947791	7234.13	3750.36	-0.94779	-0.688232	0.32995	0.481552	0.999503	lncRNA	chr1	211382736-211435570	+	ENSG00000153363.14
XLOC_023722	XLOC_023722	LINC00470	-6.92057	chr18:1268310-1359629	TKS4_WT	TKS4_WT_T	1161.61	1081.22	-0.103457	1161.61	1081.22	-0.103466	-0.0763463	0.91015	0.040887	0.999503	lncRNA	chr18	1254383-1408344	-	ENSG00000132204.14
XLOC_031221	XLOC_031221	LINC00471	149.276	chr2:231508425-231514339	TKS4_WT	TKS4_WT_T	293.337	731.219	1.31774	293.337	731.219	1.31774	0.705766	0.32085	0.493698	0.999503	lncRNA	chr2	231508420-231514396	-	ENSG00000181798.4
XLOC_045239	XLOC_045239	LINC00472	56802.4	chr6:71407863-71420745	TKS4_WT	TKS4_WT_T	0	56.9024		0.1	56.9024	9.15235	0	1	0	1	lncRNA	chr6	71343427-71420745	-	ENSG00000233237.8
XLOC_054951	XLOC_054951	LINC00476	-58.4911	chr9:95806087-96041092	TKS4_WT	TKS4_WT_T	6995.32	2903.68	-1.26851	6995.32	2903.68	-1.26851	-0.31763	0.3559	0.448672	0.999503	lncRNA	chr9	95759231-95876049	-	ENSG00000175611.13
XLOC_033309	XLOC_033309	LINC00479	628.487	chr21:41711519-41715775	TKS4_WT	TKS4_WT_T	31.2442	227.61	2.8649	31.2442	227.61	2.8649	0	1	0	1	lncRNA	chr21	41711520-41715775	-	ENSG00000236384.7
XLOC_022805	XLOC_022805	LINC00482	166.109	chr17:81302823-81309248	TKS4_WT	TKS4_WT_T	2617.95	6966.6	1.41202	2617.95	6966.6	1.41202	1.14725	0.11655	0.933488	0.999503	lncRNA	chr17	81303771-81309252	-	ENSG00000185168.6
XLOC_027850	XLOC_027850	LINC00486	85253.6	chr2:32825432-33399509	TKS4_WT	TKS4_WT_T	0	85.3536		0.1	85.3536	9.73731	0	1	0	1	lncRNA	chr2	32825359-32926693	+	ENSG00000230876.8
XLOC_042207	XLOC_042207	LINC00491	34.2026	chr5:102581367-102726828	TKS4_WT	TKS4_WT_T	3040.44	4080.35	0.424411	3040.44	4080.35	0.424413	0.313775	0.66775	0.175386	0.999503	lncRNA	chr5	102604220-102671765	-	ENSG00000250682.6
XLOC_039870	XLOC_039870	LINC00498	-22.6982	chr4:138271181-138424344	TKS4_WT	TKS4_WT_T	579.71	448.126	-0.371426	579.71	448.126	-0.371427	-0.19471	0.6043	0.218747	0.999503	lncRNA	chr4	138298856-138312658	-	ENSG00000248397.1
XLOC_039168	XLOC_039168	LINC00504	28351.2	chr4:14470464-14888169	TKS4_WT	TKS4_WT_T	0	28.4512		0.1	28.4512	8.15235	0	1	0	1	lncRNA	chr4	14470465-14888169	-	ENSG00000248360.7
XLOC_022671	XLOC_022671	LINC00511	58.2106	chr17:72598040-72640472	TKS4_WT	TKS4_WT_T	870.46	1377.16	0.661852	870.46	1377.16	0.661846	0.463955	0.51815	0.285544	0.999503	lncRNA	chr17	72290091-72640472	-	ENSG00000227036.9
XLOC_049047	XLOC_049047	LINC00513	-62.1874	chr7:130877561-131109925	TKS4_WT	TKS4_WT_T	3826.32	1446.83	-1.40306	3826.32	1446.83	-1.40306	-0.357348	0.6018	0.220548	0.999503	lncRNA	chr7	130853720-130930682	+	ENSG00000233559.2
XLOC_044538	XLOC_044538	LINC00518	82.7528	chr6:10426427-10456781	TKS4_WT	TKS4_WT_T	105.872	193.484	0.86989	105.872	193.484	0.869893	0.616778	0.5242	0.280503	0.999503	lncRNA	chr6	10429255-10435015	-	ENSG00000183674.12
XLOC_015346	XLOC_015346	LINC00519	85253.6	chr14:51304310-51328385	TKS4_WT	TKS4_WT_T	0	85.3536		0.1	85.3536	9.73731	0	1	0	1	lncRNA	chr14	51304108-51331918	-	ENSG00000258955.2
XLOC_015385	XLOC_015385	LINC00520	7.49282	chr14:55781134-55796674	TKS4_WT	TKS4_WT_T	26.468	28.4512	0.104237	26.468	28.4512	0.10424	0	1	0	1	lncRNA	chr14	55781132-55796731	-	ENSG00000258791.9
XLOC_014834	XLOC_014834	LINC00523	7.49282	chr14:100657267-100672744	TKS4_WT	TKS4_WT_T	26.468	28.4512	0.104237	26.468	28.4512	0.10424	0	1	0	1	lncRNA	chr14	100657250-100676069	+	ENSG00000196273.8
XLOC_033491	XLOC_033491	LINC00528	-8.93926	chr22:17777289-17779481	TKS4_WT	TKS4_WT_T	31.2442	28.4512	-0.135099	31.2442	28.4512	-0.135099	0	1	0	1	lncRNA	chr22	17777322-17779481	+	ENSG00000269220.1
XLOC_052622	XLOC_052622	LINC00536	-99.8111	chr8:115950510-116325059	TKS4_WT	TKS4_WT_T	52.9361	0		52.9361	0.1	-9.04811	0	1	0	1	lncRNA	chr8	115950511-116325062	-	ENSG00000249917.3
XLOC_013431	XLOC_013431	LINC00539	-99.6799	chr13:21298124-21459346	TKS4_WT	TKS4_WT_T	31.2442	0		31.2442	0.1	-8.28744	0	1	0	1	lncRNA	chr13	21302862-21348721	-	ENSG00000224429.9
XLOC_012778	XLOC_012778	LINC00540	28351.2	chr13:22210284-22276521	TKS4_WT	TKS4_WT_T	0	28.4512		0.1	28.4512	8.15235	0	1	0	1	lncRNA	chr13	22040972-22276526	+	ENSG00000276476.4
XLOC_012842	XLOC_012842	LINC00543	104.266	chr13:27953525-27955363	TKS4_WT	TKS4_WT_T	26.468	54.0652	1.03045	26.468	54.0652	1.03045	0	1	0	1	lncRNA	chr13	27953526-27955370	+	ENSG00000260704.1
XLOC_013668	XLOC_013668	LINC00562	-24.0011	chr13:47903805-47935824	TKS4_WT	TKS4_WT_T	769.364	584.708	-0.39595	769.364	584.708	-0.39595	-0.156192	0.671	0.173277	0.999503	lncRNA	chr13	47930153-47932622	-	ENSG00000260388.2
XLOC_014064	XLOC_014064	LINC00565	-99.9558	chr13:113926513-113928991	TKS4_WT	TKS4_WT_T	226.073	0		226.073	0.1	-11.1426		0.0173	1.76195	0.999503	lncRNA	chr13	113923052-113928991	-	ENSG00000260910.2
XLOC_014030	XLOC_014030	LINC00567	-99.6799	chr13:110809675-110813084	TKS4_WT	TKS4_WT_T	31.2442	0		31.2442	0.1	-8.28744	0	1	0	1	lncRNA	chr13	110809676-110813084	-	ENSG00000259831.1
XLOC_044433	XLOC_044433	LINC00574	-68.0167	chr6:169788789-169802873	TKS4_WT	TKS4_WT_T	88.9564	28.4512	-1.64461	88.9564	28.4512	-1.64461	-0.889049	0.43445	0.36206	0.999503	lncRNA	chr6	169790038-169802873	+	ENSG00000231690.4
XLOC_035981	XLOC_035981	LINC00578	-8.93926	chr3:177441920-177752704	TKS4_WT	TKS4_WT_T	31.2442	28.4512	-0.135099	31.2442	28.4512	-0.135099	0	1	0	1	lncRNA	chr3	177441910-177767379	+	ENSG00000228221.6
XLOC_052035	XLOC_052035	LINC00589	246.082	chr8:29721258-29748109	TKS4_WT	TKS4_WT_T	62.4884	216.261	1.79111	62.4884	216.261	1.79111	0	1	0	1	lncRNA	chr8	29673922-29748109	-	ENSG00000251191.8
XLOC_010588	XLOC_010588	LINC00592	-50.7016	chr12:52204822-52223880	TKS4_WT	TKS4_WT_T	57.7122	28.4512	-1.02039	57.7122	28.4512	-1.02039	-0.464375	0.5838	0.233736	0.999503	lncRNA	chr12	52164115-52223813	+	ENSG00000258279.4
XLOC_005546	XLOC_005546	LINC00595	7.49262	chr10:78267341-78280213	TKS4_WT	TKS4_WT_T	52.9361	56.9024	0.104237	52.9361	56.9024	0.104238	0	1	0	1	lncRNA	chr10	78179185-78551355	+	ENSG00000230417.12
XLOC_015157	XLOC_015157	LINC00596	28351.2	chr14:23838722-23933941	TKS4_WT	TKS4_WT_T	0	28.4512		0.1	28.4512	8.15235	0	1	0	1	lncRNA	chr14	23922247-23934568	-	ENSG00000259334.1
XLOC_013589	XLOC_013589	LINC00598	617.135	chr13:40347131-40481006	TKS4_WT	TKS4_WT_T	62.4884	448.126	2.84225	62.4884	448.126	2.84224	2.04478	0.2672	0.573164	0.999503	lncRNA	chr13	40079106-40535807	-	ENSG00000215483.12
XLOC_011467	XLOC_011467	LINC00612	10.2424	chr12:8950043-9215657	TKS4_WT	TKS4_WT_T	298.113	328.647	0.140677	298.113	328.647	0.14068	0.0404365	0.92735	0.0327563	0.999503	lncRNA	chr12	9055589-9065070	-	ENSG00000214851.5
XLOC_039868	XLOC_039868	LINC00616	-99.6222	chr4:138025237-138242349	TKS4_WT	TKS4_WT_T	26.468	0		26.468	0.1	-8.04811	0	1	0	1	lncRNA	chr4	137978547-138131182	-	ENSG00000248307.6
XLOC_013444	XLOC_013444	LINC00621	26932.6	chr13:22876391-22917546	TKS4_WT	TKS4_WT_T	0	27.0326		0.1	27.0326	8.07856	0	1	0	1	lncRNA	chr13	22859050-22916369	-	ENSG00000262619.3
XLOC_003690	XLOC_003690	LINC00622	35.4561	chr1:119597701-119599291	TKS4_WT	TKS4_WT_T	124.977	169.289	0.437825	124.977	169.289	0.437826	0.181336	0.3936	0.404945	0.999503	lncRNA	chr1	119597702-119599271	-	ENSG00000260941.1
XLOC_001292	XLOC_001292	LINC00623	25.6341	chr1:120912237-120959816	TKS4_WT	TKS4_WT_T	5201.07	6534.32	0.32923	5201.07	6534.32	0.329229	0.291558	0.69095	0.160553	0.999503	lncRNA	chr1	120913184-121009291	+	ENSG00000226067.7
XLOC_003798	XLOC_003798	LINC00624	-46.5283	chr1:147382191-147517875	TKS4_WT	TKS4_WT_T	526.774	281.675	-0.903153	526.774	281.675	-0.903153	-0.497781	0.48255	0.316458	0.999503	lncRNA	chr1	147258885-147517875	-	ENSG00000278811.4
XLOC_001777	XLOC_001777	LINC00626	-8.93926	chr1:168786940-168792888	TKS4_WT	TKS4_WT_T	31.2442	28.4512	-0.135099	31.2442	28.4512	-0.135099	0	1	0	1	lncRNA	chr1	168784012-168792886	+	ENSG00000225826.2
XLOC_004479	XLOC_004479	LINC00628	265.037	chr1:204218852-204378377	TKS4_WT	TKS4_WT_T	84.1803	307.289	1.86804	84.1803	307.289	1.86804	0.192318	0.47025	0.327671	0.999503	lncRNA	chr1	204368431-204369719	-	ENSG00000280924.1
XLOC_056456	XLOC_056456	LINC00629	142156	chrX:134550023-134560398	TKS4_WT	TKS4_WT_T	0	142.256		0.1	142.256	10.4743	0	1	0	1	lncRNA	chrX	134549770-134560399	+	ENSG00000227060.7
XLOC_056234	XLOC_056234	LINC00630	5.59335	chrX:102599205-102964523	TKS4_WT	TKS4_WT_T	43176.3	45591.3	0.0785179	43176.3	45591.3	0.0785189	0.0759134	0.90405	0.0438075	0.999503	protein_coding,protein_coding,protein_coding,protein_coding,lncRNA
XLOC_056515	XLOC_056515	LINC00632	53965.2	chrX:140709758-140772677	TKS4_WT	TKS4_WT_T	0	54.0652		0.1	54.0652	9.07856	0	1	0	1	lncRNA	chrX	140709562-140793215	+	ENSG00000203930.13
XLOC_036881	XLOC_036881	LINC00635	83835	chr3:107841661-107878068	TKS4_WT	TKS4_WT_T	0	83.935		0.1	83.935	9.71313		0.01755	1.75572	0.999503	lncRNA	chr3	107840228-107882250	-	ENSG00000241469.9
XLOC_014997	XLOC_014997	LINC00638	-38.2348	chr14:104821200-104823718	TKS4_WT	TKS4_WT_T	1211.56	748.322	-0.695133	1211.56	748.322	-0.695135	-0.480785	0.48845	0.31118	0.999503	lncRNA	chr14	104821201-104823718	+	ENSG00000258701.1
XLOC_015278	XLOC_015278	LINC00639	350.762	chr14:38749338-38919201	TKS4_WT	TKS4_WT_T	31.2442	140.837	2.17237	31.2442	140.837	2.17237	1.39542	0.2716	0.56607	0.999503	lncRNA	chr14	38738155-38948273	-	ENSG00000259070.8
XLOC_014425	XLOC_014425	LINC00640	-73.1848	chr14:51333392-51365557	TKS4_WT	TKS4_WT_T	514.634	138	-1.89888	514.634	138	-1.89888	-0.849461	0.33525	0.474631	0.999503	lncRNA	chr14	51333068-51365557	+	ENSG00000258479.6
XLOC_015098	XLOC_015098	LINC00641	-14.1329	chr14:21200078-21206900	TKS4_WT	TKS4_WT_T	49217.8	42261.9	-0.219823	49217.8	42261.9	-0.219823	-0.245245	0.73725	0.132385	0.999503	lncRNA	chr14	21200079-21206900	-	ENSG00000258441.1
XLOC_032864	XLOC_032864	LINC00649	28351.2	chr21:33931121-33971186	TKS4_WT	TKS4_WT_T	0	28.4512		0.1	28.4512	8.15235	0	1	0	1	lncRNA	chr21	33915534-33977703	+	ENSG00000237945.8
XLOC_032167	XLOC_032167	LINC00652	82.6863	chr20:18787970-18796065	TKS4_WT	TKS4_WT_T	269.457	492.261	0.869371	269.457	492.261	0.869368	0.371911	0.6989	0.155585	0.999503	lncRNA	chr20	18786065-18794579	-	ENSG00000179935.10
XLOC_031489	XLOC_031489	LINC00653	14.4568	chr20:18787970-18796065	TKS4_WT	TKS4_WT_T	550.654	630.261	0.194803	550.654	630.261	0.194803	0.105665	0.8782	0.0564066	0.999503	lncRNA	chr20	18794529-18796067	+	ENSG00000273148.1
XLOC_032076	XLOC_032076	LINC00654	62.1892	chr20:5496066-5504596	TKS4_WT	TKS4_WT_T	408.762	662.968	0.69768	408.762	662.968	0.697678	0.457216	0.5139	0.289121	0.999503	lncRNA	chr20	5482736-5526709	-	ENSG00000205181.8
XLOC_032073	XLOC_032073	LINC00658	56802.4	chr20:5431956-5445748	TKS4_WT	TKS4_WT_T	0	56.9024		0.1	56.9024	9.15235	0	1	0	1	lncRNA	chr20	5426892-5471094	-	ENSG00000226995.9
XLOC_032606	XLOC_032606	LINC00659	185.125	chr20:62773516-62776968	TKS4_WT	TKS4_WT_T	1348.67	3845.4	1.51159	1348.67	3845.4	1.5116	0.935718	0.21475	0.668067	0.999503	lncRNA	chr20	62772980-62776996	-	ENSG00000228705.3
XLOC_025966	XLOC_025966	LINC00662	-37.0502	chr19:27790492-28024969	TKS4_WT	TKS4_WT_T	3157.26	1987.49	-0.667727	3157.26	1987.49	-0.667725	-0.351589	0.59595	0.22479	0.999503	lncRNA	chr19	27681072-27794005	-	ENSG00000261824.8
XLOC_025888	XLOC_025888	LINC00663	-8.41334	chr19:19756370-19836182	TKS4_WT	TKS4_WT_T	702.099	643.029	-0.126791	702.099	643.029	-0.126791	-0.055126	0.74255	0.129274	0.999503	lncRNA	chr19	19757366-19776423	-	ENSG00000266904.7
XLOC_026053	XLOC_026053	LINC00665	-74.4667	chr19:36313060-36331718	TKS4_WT	TKS4_WT_T	105.872	27.0326	-1.96955	105.872	27.0326	-1.96955	0	1	0	1	lncRNA	chr19	36259540-36331770	-	ENSG00000232677.10
XLOC_015771	XLOC_015771	LINC00677	26932.6	chr14:103120848-103137439	TKS4_WT	TKS4_WT_T	0	27.0326		0.1	27.0326	8.07856	0	1	0	1	lncRNA	chr14	103120847-103123007	-	ENSG00000259717.1
XLOC_008898	XLOC_008898	LINC00678	56802.4	chr11:27506851-27722030	TKS4_WT	TKS4_WT_T	0	56.9024		0.1	56.9024	9.15235	0	1	0	1	lncRNA	chr11	27617626-27634627	-	ENSG00000254934.5
XLOC_055569	XLOC_055569	LINC00685	15.2862	chrX:319144-321332	TKS4_WT	TKS4_WT_T	971.157	1119.61	0.205215	971.157	1119.61	0.20522	0.13913	0.8288	0.0815503	0.999503	lncRNA	chrY	320990-321851	+	ENSG00000226179.6_PAR_Y
XLOC_049338	XLOC_049338	LINC00689	-99.6799	chr7:159008353-159026238	TKS4_WT	TKS4_WT_T	31.2442	0		31.2442	0.1	-8.28744	0	1	0	1	lncRNA	chr7	159006522-159030195	+	ENSG00000231419.6
XLOC_035240	XLOC_035240	LINC00698	-35.0111	chr3:63102687-63125062	TKS4_WT	TKS4_WT_T	341.497	221.935	-0.621736	341.497	221.935	-0.621736	-0.313866	0.6451	0.190373	0.999503	lncRNA	chr3	62950430-63125062	+	ENSG00000244342.5
XLOC_004991	XLOC_004991	LINC00703	28351.2	chr10:4384213-4410612	TKS4_WT	TKS4_WT_T	0	28.4512		0.1	28.4512	8.15235	0	1	0	1	lncRNA	chr10	4384246-4410614	+	ENSG00000224382.2
XLOC_006107	XLOC_006107	LINC00706	-99.8741	chr10:6774302-6779180	TKS4_WT	TKS4_WT_T	79.4041	0		79.4041	0.1	-9.63307	0	1	0	1	lncRNA	chr10	6772271-6779180	-	ENSG00000281186.2
XLOC_005022	XLOC_005022	LINC00707	16.0134	chr10:6779597-7119993	TKS4_WT	TKS4_WT_T	310.253	359.935	0.214292	310.253	359.935	0.214291	0.128449	0.8452	0.0730405	0.999503	lncRNA	chr10	6779549-6879450	+	ENSG00000238266.2
XLOC_005265	XLOC_005265	LINC00839	-11.7137	chr10:42475490-42495337	TKS4_WT	TKS4_WT_T	19830.7	17507.8	-0.179738	19830.7	17507.8	-0.179738	-0.165593	0.80625	0.0935303	0.999503	lncRNA	chr10	42475480-42495337	+	ENSG00000185904.12
XLOC_005329	XLOC_005329	LINC00842	-99.9453	chr10:46398361-46453306	TKS4_WT	TKS4_WT_T	182.689	0		182.689	0.1	-10.8352		0.11955	0.92245	0.999503	lncRNA	chr10	46398362-46453306	+	ENSG00000285294.1
XLOC_041533	XLOC_041533	LINC00847	-18.507	chr5:180829953-180835726	TKS4_WT	TKS4_WT_T	6831.14	5566.9	-0.295252	6831.14	5566.9	-0.295252	-0.186661	0.80205	0.0957986	0.999503	lncRNA	chr5	180830326-180839742	+	ENSG00000245060.8
XLOC_034784	XLOC_034784	LINC00852	-62.6263	chr3:10248458-10293449	TKS4_WT	TKS4_WT_T	2238.24	836.513	-1.4199	2238.24	836.513	-1.4199	-0.21514	0.471	0.326979	0.999503	lncRNA	chr3	10284419-10285746	+	ENSG00000231177.4
XLOC_000680	XLOC_000680	LINC00853	67.6289	chr1:47179249-47180339	TKS4_WT	TKS4_WT_T	115.424	193.484	0.745265	115.424	193.484	0.745271	0.318739	0.6741	0.171276	0.999503	lncRNA	chr1	47179250-47180339	+	ENSG00000224805.2
XLOC_005566	XLOC_005566	LINC00857	-17.3247	chr10:80207709-80219657	TKS4_WT	TKS4_WT_T	8173.84	6757.75	-0.274471	8173.84	6757.75	-0.274471	-0.233948	0.7459	0.127319	0.999503	lncRNA	chr10	80207372-80219657	+	ENSG00000237523.2
XLOC_005587	XLOC_005587	LINC00858	189128	chr10:84279979-84294659	TKS4_WT	TKS4_WT_T	0	189.228		0.1	189.228	10.8859	0	1	0	1	lncRNA	chr10	84267747-84294659	+	ENSG00000229404.6
XLOC_052692	XLOC_052692	LINC00861	247.032	chr8:125922522-125951197	TKS4_WT	TKS4_WT_T	88.9564	308.707	1.79507	88.9564	308.707	1.79507	0.756076	0.363	0.440093	0.999503	lncRNA	chr8	125859721-126292788	-	ENSG00000245164.9
XLOC_004414	XLOC_004414	LINC00862	-99.84	chr1:200342543-200373792	TKS4_WT	TKS4_WT_T	62.4884	0		62.4884	0.1	-9.28744	0	1	0	1	lncRNA	chr1	200253419-200400705	-	ENSG00000203721.8
XLOC_005610	XLOC_005610	LINC00863	4.72914	chr10:87238666-87357302	TKS4_WT	TKS4_WT_T	2248.19	2354.51	0.066666	2248.19	2354.51	0.0666629	0.0410724	0.9625	0.0165993	0.999503	lncRNA	chr10	87341685-87357882	+	ENSG00000224914.4
XLOC_005650	XLOC_005650	LINC00865	-99.8111	chr10:89823519-89840861	TKS4_WT	TKS4_WT_T	52.9361	0		52.9361	0.1	-9.04811	0	1	0	1	lncRNA	chr10	89829483-89840863	+	ENSG00000232229.7
XLOC_035295	XLOC_035295	LINC00870	25.2087	chr3:72151256-72174339	TKS4_WT	TKS4_WT_T	249.953	312.963	0.324333	249.953	312.963	0.324335	0	1	0	1	lncRNA	chr3	72151236-72207776	+	ENSG00000243083.7
XLOC_037294	XLOC_037294	LINC00880	4.01701	chr3:157081666-157123002	TKS4_WT	TKS4_WT_T	817.922	850.778	0.0568192	817.922	850.778	0.0568195	0.0302934	0.9665	0.0147981	0.999503	lncRNA	chr3	157081667-157128595	-	ENSG00000243629.2
XLOC_036878	XLOC_036878	LINC00882	156.673	chr3:107109789-107240638	TKS4_WT	TKS4_WT_T	105.872	271.745	1.35993	105.872	271.745	1.35993	0.980119	0.2369	0.625435	0.999503	lncRNA	chr3	106449775-107240671	-	ENSG00000242759.8
XLOC_037291	XLOC_037291	LINC00886	-55.7752	chr3:156747342-156817062	TKS4_WT	TKS4_WT_T	1589.08	702.768	-1.17707	1589.08	702.768	-1.17707	-0.458072	0.6431	0.191721	0.999503	lncRNA	chr3	156747343-156817062	-	ENSG00000240875.6
XLOC_037557	XLOC_037557	LINC00887	85253.6	chr3:194301198-194312804	TKS4_WT	TKS4_WT_T	0	85.3536		0.1	85.3536	9.73731	0	1	0	1	lncRNA	chr3	194296191-194322871	-	ENSG00000214145.8
XLOC_033536	XLOC_033536	LINC00896	59.805	chr22:20206036-20213800	TKS4_WT	TKS4_WT_T	2260.33	3612.12	0.676313	2260.33	3612.12	0.676312	0.34543	0.61075	0.214137	0.999503	lncRNA	chr22	20206397-20208524	+	ENSG00000236499.2
XLOC_034431	XLOC_034431	LINC00898	53965.2	chr22:47621042-47631569	TKS4_WT	TKS4_WT_T	0	54.0652		0.1	54.0652	9.07856	0	1	0	1	lncRNA	chr22	47612231-47631569	-	ENSG00000205634.7
XLOC_023475	XLOC_023475	LINC00907	-13.4796	chr18:42186667-42691426	TKS4_WT	TKS4_WT_T	31.2442	27.0326	-0.208887	31.2442	27.0326	-0.208888	0	1	0	1	lncRNA	chr18	42159283-42691422	+	ENSG00000267586.7
XLOC_022324	XLOC_022324	LINC00910	82.5668	chr17:43368633-43388898	TKS4_WT	TKS4_WT_T	702.099	1281.8	0.868426	702.099	1281.8	0.868425	0.567291	0.4143	0.382685	0.999503	lncRNA	chr17	43338741-43389226	-	ENSG00000188825.15
XLOC_020234	XLOC_020234	LINC00917	28351.2	chr16:86331849-86345679	TKS4_WT	TKS4_WT_T	0	28.4512		0.1	28.4512	8.15235	0	1	0	1	lncRNA	chr16	86331632-86349688	-	ENSG00000168367.11
XLOC_019093	XLOC_019093	LINC00920	4.98209	chr16:66408523-66410901	TKS4_WT	TKS4_WT_T	1353.85	1421.3	0.0701437	1353.85	1421.3	0.0701432	0.0487801	0.94495	0.0245912	0.999503	lncRNA	chr16	66408516-66412135	+	ENSG00000246898.2
XLOC_018529	XLOC_018529	LINC00921	94.5128	chr16:3263767-3267567	TKS4_WT	TKS4_WT_T	141.893	276	0.959872	141.893	276	0.959865	0.423733	0.612	0.213249	0.999503	lncRNA	chr16	3263743-3267567	+	ENSG00000281005.1
XLOC_017956	XLOC_017956	LINC00923	-78.3028	chr15:97742615-97874429	TKS4_WT	TKS4_WT_T	1442.41	312.963	-2.20441	1442.41	312.963	-2.20442	-1.95501	0.3028	0.518844	0.999503	lncRNA	chr15	97572185-97875650	-	ENSG00000251209.9
XLOC_016688	XLOC_016688	LINC00926	-31.1389	chr15:57300364-57307769	TKS4_WT	TKS4_WT_T	1382.11	951.736	-0.538237	1382.11	951.736	-0.538239	-0.310445	0.6606	0.180061	0.999503	lncRNA	chr15	57300365-57307769	+	ENSG00000247982.7
XLOC_017800	XLOC_017800	LINC00927	56802.4	chr15:80263067-80341805	TKS4_WT	TKS4_WT_T	0	56.9024		0.1	56.9024	9.15235	0	1	0	1	lncRNA	chr15	80263068-80341805	-	ENSG00000259361.7
XLOC_011457	XLOC_011457	LINC00937	-68.0167	chr12:8356962-8390752	TKS4_WT	TKS4_WT_T	177.913	56.9024	-1.64461	177.913	56.9024	-1.64461	-0.765497	0.494	0.306273	0.999503	lncRNA	chr12	8295986-8396803	-	ENSG00000226091.7
XLOC_011366	XLOC_011366	LINC00940	-99.8933	chr12:1929201-1936576	TKS4_WT	TKS4_WT_T	93.7326	0		93.7326	0.1	-9.87241	0	1	0	1	lncRNA	chr12	1929202-1936574	-	ENSG00000235049.1
XLOC_010420	XLOC_010420	LINC00941	22.0897	chr12:30795680-30802711	TKS4_WT	TKS4_WT_T	3194.07	3899.63	0.287939	3194.07	3899.63	0.287941	0.241932	0.7069	0.150642	0.999503	lncRNA	chr12	30755167-30802602	+	ENSG00000235884.4
XLOC_010130	XLOC_010130	LINC00942	-7.79175	chr12:1500490-1504424	TKS4_WT	TKS4_WT_T	305.477	281.675	-0.117033	305.477	281.675	-0.117032	-0.0546211	0.93795	0.0278203	0.999503	lncRNA	chr12	1500525-1504424	+	ENSG00000249628.3
XLOC_048335	XLOC_048335	LINC00957	-77.2349	chr7:44028886-44044296	TKS4_WT	TKS4_WT_T	124.977	28.4512	-2.1351	124.977	28.4512	-2.1351	0	1	0	1	lncRNA	chr7	44039171-44042306	+	ENSG00000235314.1
XLOC_008797	XLOC_008797	LINC00958	406808	chr11:12979533-12989548	TKS4_WT	TKS4_WT_T	0	406.908		0.1	406.908	11.9905		0.00435	2.36151	0.613882	lncRNA	chr11	12961541-12989597	-	ENSG00000251381.8
XLOC_035331	XLOC_035331	LINC00960	-16.1498	chr3:75672280-75679303	TKS4_WT	TKS4_WT_T	397.021	332.903	-0.254113	397.021	332.903	-0.254113	-0.236613	0.7807	0.107516	0.999503	lncRNA	chr3	75672254-75742048	+	ENSG00000242516.3
XLOC_054138	XLOC_054138	LINC00963	-40.617	chr9:129488659-129513686	TKS4_WT	TKS4_WT_T	7716.52	4582.3	-0.751879	7716.52	4582.3	-0.751878	-0.652571	0.35835	0.445693	0.999503	lncRNA	chr9	129476946-129513687	+	ENSG00000204054.14
XLOC_051598	XLOC_051598	LINC00964	28351.2	chr8:124942007-124951095	TKS4_WT	TKS4_WT_T	0	28.4512		0.1	28.4512	8.15235	0	1	0	1	lncRNA	chr8	124823702-124962531	+	ENSG00000249816.8
XLOC_004201	XLOC_004201	LINC00970	53965.2	chr1:168903904-169087005	TKS4_WT	TKS4_WT_T	0	54.0652		0.1	54.0652	9.07856	0	1	0	1	lncRNA	chr1	168903905-169087005	-	ENSG00000203601.3
XLOC_010257	XLOC_010257	LINC00987	-99.9134	chr12:9239325-9262877	TKS4_WT	TKS4_WT_T	115.424	0		115.424	0.1	-10.1727	0	1	0	1	lncRNA	chr12	9240003-9257960	+	ENSG00000237248.5
XLOC_041023	XLOC_041023	LINC00992	-31.7046	chr5:117415511-117579744	TKS4_WT	TKS4_WT_T	124.977	85.3536	-0.550136	124.977	85.3536	-0.550139	0	1	0	1	lncRNA	chr5	117415509-117546298	+	ENSG00000248663.7
XLOC_049259	XLOC_049259	LINC00996	108030	chr7:150433653-150448140	TKS4_WT	TKS4_WT_T	0	108.13		0.1	108.13	10.0786	0	1	0	1	lncRNA	chr7	150433654-150448141	+	ENSG00000242258.2
XLOC_048257	XLOC_048257	LINC00997	-17.3816	chr7:32758285-32762924	TKS4_WT	TKS4_WT_T	5290.02	4370.53	-0.275465	5290.02	4370.53	-0.275465	-0.241659	0.72885	0.137362	0.999503	lncRNA	chr7	32760279-32762924	+	ENSG00000281332.1
XLOC_008546	XLOC_008546	LINC01001	-68.943	chr11:127133-139117	TKS4_WT	TKS4_WT_T	824.488	256.061	-1.68701	824.488	256.061	-1.68701	-0.792503	0.42435	0.372276	0.999503	lncRNA	chr11	127204-139612	-	ENSG00000230724.9
XLOC_025470	XLOC_025470	LINC01002	-40.8255	chr19:197015-202209	TKS4_WT	TKS4_WT_T	240.401	142.256	-0.756955	240.401	142.256	-0.756953	-0.332462	0.62495	0.204155	0.999503	lncRNA	chr19	198264-246544	-	ENSG00000282508.2
XLOC_049287	XLOC_049287	LINC01003	105.032	chr7:152464123-152465545	TKS4_WT	TKS4_WT_T	1284.4	2633.43	1.03585	1284.4	2633.43	1.03585	0.737475	0.3235	0.490126	0.999503	lncRNA	chr7	152463786-152465549	+	ENSG00000261455.1
XLOC_050182	XLOC_050182	LINC01004	-37.5421	chr7:104940948-105399363	TKS4_WT	TKS4_WT_T	9300.42	5808.85	-0.679043	9300.42	5808.85	-0.679043	-0.191812	0.78915	0.10284	0.999503	lncRNA	chr7	104950315-105013068	-	ENSG00000228393.5
XLOC_050562	XLOC_050562	LINC01006	-6.72028	chr7:156472098-156893183	TKS4_WT	TKS4_WT_T	1043.2	973.094	-0.100361	1043.2	973.094	-0.100365	-0.00942643	0.95835	0.0184759	0.999503	lncRNA	chr7	156388922-156640654	-	ENSG00000182648.14
XLOC_050155	XLOC_050155	LINC01007	56802.4	chr7:101562754-101569006	TKS4_WT	TKS4_WT_T	0	56.9024		0.1	56.9024	9.15235	0	1	0	1	lncRNA	chr7	101562779-101569006	-	ENSG00000233123.2
XLOC_042986	XLOC_042986	LINC01011	78.3125	chr6:2987966-2999292	TKS4_WT	TKS4_WT_T	702.099	1251.93	0.83441	702.099	1251.93	0.834408	0.523305	0.4728	0.325323	0.999503	lncRNA	chr6	2987967-2991173	+	ENSG00000244041.7
XLOC_043292	XLOC_043292	LINC01012	-17.224	chr6:27694034-27710222	TKS4_WT	TKS4_WT_T	3098.75	2565.02	-0.272714	3098.75	2565.02	-0.272716	-0.202688	0.81185	0.0905242	0.999503	lncRNA	chr6	27694027-27713706	+	ENSG00000281706.4
XLOC_044974	XLOC_044974	LINC01016	-99.6799	chr6:33889510-33914794	TKS4_WT	TKS4_WT_T	31.2442	0		31.2442	0.1	-8.28744	0	1	0	1	lncRNA	chr6	33867506-33896914	-	ENSG00000249346.7
XLOC_042227	XLOC_042227	LINC01023	-11.4092	chr5:108727824-108728261	TKS4_WT	TKS4_WT_T	440.006	389.805	-0.17477	440.006	389.805	-0.174771	-0.109428	0.8705	0.0602312	0.999503	lncRNA	chr5	108727825-108728260	-	ENSG00000272523.1
XLOC_001961	XLOC_001961	LINC01031	114.986	chr1:193304744-193365953	TKS4_WT	TKS4_WT_T	26.468	56.9024	1.10424	26.468	56.9024	1.10424	0	1	0	1	lncRNA	chr1	193304745-193365953	+	ENSG00000232077.2
XLOC_013516	XLOC_013516	LINC01058	2.13314	chr13:30419438-30422244	TKS4_WT	TKS4_WT_T	26.468	27.0326	0.0304486	26.468	27.0326	0.0304511	0	1	0	1	lncRNA	chr13	30418339-30422251	-	ENSG00000225039.2
XLOC_037602	XLOC_037602	LINC01063	-90.8297	chr3:196631503-196632587	TKS4_WT	TKS4_WT_T	310.253	28.4512	-3.44688	310.253	28.4512	-3.44688	-2.83601	0.24815	0.605286	0.999503	lncRNA	chr3	196631498-196632700	-	ENSG00000232065.2
XLOC_013171	XLOC_013171	LINC01068	-99.6222	chr13:79566726-79571446	TKS4_WT	TKS4_WT_T	26.468	0		26.468	0.1	-8.04811	0	1	0	1	lncRNA	chr13	79566678-79571445	+	ENSG00000227676.4
XLOC_038373	XLOC_038373	LINC01088	-99.6222	chr4:78971747-79326061	TKS4_WT	TKS4_WT_T	26.468	0		26.468	0.1	-8.04811	0	1	0	1	lncRNA	chr4	78939485-79309673	+	ENSG00000249307.8
XLOC_012465	XLOC_012465	LINC01089	142.66	chr12:121795266-121802946	TKS4_WT	TKS4_WT_T	2476.45	6009.35	1.27894	2476.45	6009.35	1.27894	1.04197	0.1702	0.76904	0.999503	lncRNA	chr12	121795267-121803906	-	ENSG00000212694.8
XLOC_038646	XLOC_038646	LINC01091	190547	chr4:123649990-123930778	TKS4_WT	TKS4_WT_T	0	190.647		0.1	190.647	10.8967	0	1	0	1	lncRNA	chr4	123539026-123962704	+	ENSG00000249464.7
XLOC_038368	XLOC_038368	LINC01094	-20.7774	chr4:78645993-78684501	TKS4_WT	TKS4_WT_T	454.334	359.935	-0.336017	454.334	359.935	-0.336017	-0.176365	0.73595	0.133152	0.999503	lncRNA	chr4	78638780-78683185	+	ENSG00000251442.7
XLOC_039161	XLOC_039161	LINC01096	170607	chr4:13546075-13547824	TKS4_WT	TKS4_WT_T	0	170.707		0.1	170.707	10.7373	0	1	0	1	lncRNA	chr4	13546075-13547801	-	ENSG00000246095.2
XLOC_038934	XLOC_038934	LINC01098	-83.3729	chr4:177728756-177990750	TKS4_WT	TKS4_WT_T	1026.68	170.707	-2.58839	1026.68	170.707	-2.58839	-2.55189	0.2576	0.589054	0.999503	lncRNA	chr4	177728757-178028971	+	ENSG00000231171.4
XLOC_040111	XLOC_040111	LINC01099	-46.2537	chr4:177728756-177990750	TKS4_WT	TKS4_WT_T	52.9361	28.4512	-0.895763	52.9361	28.4512	-0.895762	0	1	0	1	lncRNA	chr4	177729638-177907936	-	ENSG00000251504.1
XLOC_030369	XLOC_030369	LINC01106	-15.6181	chr2:110375108-110385043	TKS4_WT	TKS4_WT_T	4816.98	4064.66	-0.244994	4816.98	4064.66	-0.244994	-0.211396	0.75445	0.12237	0.999503	lncRNA	chr2	110375138-110384442	-	ENSG00000175772.11
XLOC_044571	XLOC_044571	LINC01108	416.027	chr6:14280126-14285454	TKS4_WT	TKS4_WT_T	26.468	136.582	2.36744	26.468	136.582	2.36745	1.29381	0.30845	0.510815	0.999503	lncRNA	chr6	14280127-14285454	-	ENSG00000226673.2
XLOC_027943	XLOC_027943	LINC01118	-75.3507	chr2:46816667-46822660	TKS4_WT	TKS4_WT_T	115.424	28.4512	-2.02039	115.424	28.4512	-2.02038	-1.17728	0.3968	0.401428	0.999503	lncRNA	chr2	46698940-46822804	+	ENSG00000222005.9
XLOC_027944	XLOC_027944	LINC01119	-41.4	chr2:46827863-46859006	TKS4_WT	TKS4_WT_T	509.858	298.777	-0.771025	509.858	298.777	-0.771026	-0.433075	0.58525	0.232659	0.999503	lncRNA	chr2	46816697-46859009	+	ENSG00000239332.7
XLOC_028639	XLOC_028639	LINC01120	28351.2	chr2:131402900-131408228	TKS4_WT	TKS4_WT_T	0	28.4512		0.1	28.4512	8.15235	0	1	0	1	lncRNA	chr2	131402778-131410050	+	ENSG00000223631.2
XLOC_028447	XLOC_028447	LINC01123	5.19964	chr2:109986345-109995281	TKS4_WT	TKS4_WT_T	5540.77	5828.87	0.0731299	5540.77	5828.87	0.0731297	0.062287	0.92455	0.0340696	0.999503	lncRNA	chr2	109987063-109996140	+	ENSG00000204588.5
XLOC_030768	XLOC_030768	LINC01124	235.256	chr2:170700367-170798977	TKS4_WT	TKS4_WT_T	173.137	580.452	1.74527	173.137	580.452	1.74526	0.507054	0.57755	0.23841	0.999503	lncRNA	chr2	170712451-170714567	-	ENSG00000222033.1
XLOC_027915	XLOC_027915	LINC01126	101.16	chr2:43227210-43228855	TKS4_WT	TKS4_WT_T	1524.8	3067.29	1.00835	1524.8	3067.29	1.00834	0.763342	0.2794	0.553774	0.999503	lncRNA	chr2	43227210-43228855	+	ENSG00000279873.2
XLOC_000022	XLOC_000022	LINC01128	4.3365	chr1:827590-859446	TKS4_WT	TKS4_WT_T	14361.8	14984.6	0.0612494	14361.8	14984.6	0.061244	0.0593795	0.93825	0.0276814	0.999503	lncRNA	chr1	825138-859446	+	ENSG00000228794.11
XLOC_002331	XLOC_002331	LINC01132	-99.6222	chr1:234724041-234731643	TKS4_WT	TKS4_WT_T	26.468	0		26.468	0.1	-8.04811	0	1	0	1	lncRNA	chr1	234724042-234736720	+	ENSG00000227630.4
XLOC_001647	XLOC_001647	LINC01133	28351.2	chr1:159951491-159984730	TKS4_WT	TKS4_WT_T	0	28.4512		0.1	28.4512	8.15235	0	1	0	1	lncRNA	chr1	159958035-159984750	+	ENSG00000224259.8
XLOC_000094	XLOC_000094	LINC01134	144.033	chr1:3900403-3915447	TKS4_WT	TKS4_WT_T	57.7122	140.837	1.28708	57.7122	140.837	1.28708	0.506627	0.48065	0.318171	0.999503	lncRNA	chr1	3900352-3917225	+	ENSG00000236423.7
XLOC_003819	XLOC_003819	LINC01138	-26.9922	chr1:148432958-148459920	TKS4_WT	TKS4_WT_T	3228.9	2357.35	-0.453875	3228.9	2357.35	-0.453877	-0.206682	0.82335	0.0844155	0.999503	lncRNA	chr1	148290889-148519604	-	ENSG00000274020.4
XLOC_000979	XLOC_000979	LINC01140	-43.7199	chr1:87129764-87169204	TKS4_WT	TKS4_WT_T	637.023	358.517	-0.829306	637.023	358.517	-0.829304	-0.542357	0.4812	0.317674	0.999503	lncRNA	chr1	87129765-87169198	+	ENSG00000267272.5
XLOC_000650	XLOC_000650	LINC01144	7.46568	chr1:45296559-45305619	TKS4_WT	TKS4_WT_T	209.157	224.772	0.103878	209.157	224.772	0.103876	0.039399	0.65295	0.18512	0.999503	lncRNA	chr1	45303910-45305619	+	ENSG00000281912.1
XLOC_043440	XLOC_043440	LINC01149	28351.2	chr6:31441666-31446973	TKS4_WT	TKS4_WT_T	0	28.4512		0.1	28.4512	8.15235	0	1	0	1	lncRNA	chr6	31441667-31446973	+	ENSG00000230174.1
XLOC_052662	XLOC_052662	LINC01151	28351.2	chr8:122670384-122694106	TKS4_WT	TKS4_WT_T	0	28.4512		0.1	28.4512	8.15235	0	1	0	1	lncRNA	chr8	122485194-122733804	-	ENSG00000253819.2
XLOC_021471	XLOC_021471	LINC01152	-99.8111	chr17:72030653-72057734	TKS4_WT	TKS4_WT_T	52.9361	0		52.9361	0.1	-9.04811	0	1	0	1	lncRNA	chr17	72030291-72041310	+	ENSG00000256124.6
XLOC_003594	XLOC_003594	LINC01160	-8.93926	chr1:111483347-111716695	TKS4_WT	TKS4_WT_T	31.2442	28.4512	-0.135099	31.2442	28.4512	-0.135099	0	1	0	1	lncRNA	chr1	111599655-111608723	-	ENSG00000231346.5
XLOC_029350	XLOC_029350	LINC01173	-99.6222	chr2:234682667-234717764	TKS4_WT	TKS4_WT_T	26.468	0		26.468	0.1	-8.04811	0	1	0	1	lncRNA	chr2	234682668-234717764	+	ENSG00000280744.1
XLOC_048239	XLOC_048239	LINC01176	-15.6094	chr7:30390884-30404055	TKS4_WT	TKS4_WT_T	293.337	247.549	-0.244845	293.337	247.549	-0.244845	-0.113137	0.88495	0.0530813	0.999503	lncRNA	chr7	30390885-30412375	+	ENSG00000281404.2
XLOC_056900	XLOC_056900	LINC01186	294.076	chrX:46325923-46327674	TKS4_WT	TKS4_WT_T	403.986	1592.01	1.97847	403.986	1592.01	1.97847	1.33056	0.07905	1.1021	0.999503	lncRNA	chrX	46256759-46327680	-	ENSG00000236751.3
XLOC_028509	XLOC_028509	LINC01191	100.578	chr2:113969321-114028082	TKS4_WT	TKS4_WT_T	110.648	221.935	1.00416	110.648	221.935	1.00416	0.954498	0.5984	0.223008	0.999503	lncRNA	chr2	113970719-114007304	+	ENSG00000234199.3
XLOC_013660	XLOC_013660	LINC01198	109.626	chr13:46455202-46466776	TKS4_WT	TKS4_WT_T	26.468	55.4838	1.06781	26.468	55.4838	1.06782	0.486961	0.4368	0.359717	0.999503	lncRNA	chr13	46455131-46515958	-	ENSG00000231817.9
XLOC_055822	XLOC_055822	LINC01204	772.547	chrX:45505387-45527239	TKS4_WT	TKS4_WT_T	79.4041	692.838	3.12523	79.4041	692.838	3.12523	3.07364	0.255	0.59346	0.999503	lncRNA	chrX	45505388-45632121	+	ENSG00000229563.7
XLOC_036007	XLOC_036007	LINC01206	114.986	chr3:181952363-182010678	TKS4_WT	TKS4_WT_T	26.468	56.9024	1.10424	26.468	56.9024	1.10424	0	1	0	1	lncRNA	chr3	181952343-182035644	+	ENSG00000242512.9
XLOC_037407	XLOC_037407	LINC01208	-54.4696	chr3:176604147-176635532	TKS4_WT	TKS4_WT_T	62.4884	28.4512	-1.1351	62.4884	28.4512	-1.1351	0	1	0	1	lncRNA	chr3	176415439-176867838	-	ENSG00000223715.3
XLOC_037408	XLOC_037408	LINC01209	-63.5757	chr3:176814154-176817001	TKS4_WT	TKS4_WT_T	156.221	56.9024	-1.45703	156.221	56.9024	-1.45703	0	1	0	1	lncRNA	chr3	176814155-176817001	-	ENSG00000228308.2
XLOC_037238	XLOC_037238	LINC01214	55383.8	chr3:150265406-150353289	TKS4_WT	TKS4_WT_T	0	55.4838		0.1	55.4838	9.11592		0.20485	0.688564	0.999503	lncRNA	chr3	150308236-150330986	-	ENSG00000289524.1
XLOC_039665	XLOC_039665	LINC01217	-99.8933	chr4:100785230-100791426	TKS4_WT	TKS4_WT_T	93.7326	0		93.7326	0.1	-9.87241	0	1	0	1	lncRNA	chr4	100778582-100791426	-	ENSG00000251219.2
XLOC_039666	XLOC_039666	LINC01218	-43.7397	chr4:100811428-100816063	TKS4_WT	TKS4_WT_T	146.669	82.5164	-0.829808	146.669	82.5164	-0.829811	-0.339616	0.6697	0.17412	0.999503	lncRNA	chr4	100812255-100814280	-	ENSG00000251636.1
XLOC_014651	XLOC_014651	LINC01220	2.13314	chr14:75294403-75296410	TKS4_WT	TKS4_WT_T	26.468	27.0326	0.0304486	26.468	27.0326	0.0304511	0	1	0	1	lncRNA	chr14	75294404-75298109	+	ENSG00000259687.3
XLOC_004407	XLOC_004407	LINC01222	-99.6799	chr1:198992588-199076735	TKS4_WT	TKS4_WT_T	31.2442	0		31.2442	0.1	-8.28744	0	1	0	1	lncRNA	chr1	199006040-199021037	-	ENSG00000233410.1
XLOC_025953	XLOC_025953	LINC01224	56802.4	chr19:23399232-23416074	TKS4_WT	TKS4_WT_T	0	56.9024		0.1	56.9024	9.15235	0	1	0	1	lncRNA	chr19	23399097-23416075	-	ENSG00000269416.7
XLOC_013956	XLOC_013956	LINC01232	274482	chr13:99486961-99499306	TKS4_WT	TKS4_WT_T	0	274.582		0.1	274.582	11.423		0.01205	1.91901	0.999503	lncRNA	chr13	99486962-99499306	-	ENSG00000280734.3
XLOC_012378	XLOC_012378	LINC01234	-1.15013	chr12:113744576-113773683	TKS4_WT	TKS4_WT_T	31970.4	31602.7	-0.01669	31970.4	31602.7	-0.016689	-0.0166692	0.97965	0.00892906	0.999503	lncRNA	chr12	113583886-113773726	-	ENSG00000249550.8
XLOC_029429	XLOC_029429	LINC01237	85253.6	chr2:241881362-242084138	TKS4_WT	TKS4_WT_T	0	85.3536		0.1	85.3536	9.73731	0	1	0	1	lncRNA	chr2	241881363-242078722	+	ENSG00000233806.8
XLOC_029430	XLOC_029430	LINC01238	-89.6397	chr2:241881362-242084138	TKS4_WT	TKS4_WT_T	810.16	83.935	-3.27086	810.16	83.935	-3.27086	-1.0041	0.1802	0.744245	0.999503	lncRNA	chr2	241970683-241977276	+	ENSG00000237940.3
XLOC_053340	XLOC_053340	LINC01239	28351.2	chr9:22646199-22824213	TKS4_WT	TKS4_WT_T	0	28.4512		0.1	28.4512	8.15235	0	1	0	1	lncRNA	chr9	22646200-22824213	+	ENSG00000234840.2
XLOC_010290	XLOC_010290	LINC01252	-54.4697	chr12:11548029-11564403	TKS4_WT	TKS4_WT_T	124.977	56.9024	-1.1351	124.977	56.9024	-1.1351	0	1	0	1	lncRNA	chr12	11548030-11590369	+	ENSG00000247157.7
XLOC_011306	XLOC_011306	LINC01257	-99.8741	chr12:131165010-131212931	TKS4_WT	TKS4_WT_T	79.4041	0		79.4041	0.1	-9.63307	0	1	0	1	lncRNA	chr12	131165011-131232940	+	ENSG00000204603.7
XLOC_032421	XLOC_032421	LINC01260	-99.6799	chr20:44656450-44671739	TKS4_WT	TKS4_WT_T	31.2442	0		31.2442	0.1	-8.28744	0	1	0	1	lncRNA	chr20	44656451-44663498	-	ENSG00000283440.1
XLOC_036281	XLOC_036281	LINC01267	28351.2	chr3:14348450-14352568	TKS4_WT	TKS4_WT_T	0	28.4512		0.1	28.4512	8.15235	0	1	0	1	lncRNA	chr3	14348451-14352568	-	ENSG00000251576.1
XLOC_031831	XLOC_031831	LINC01270	26.3459	chr20:50292719-50321342	TKS4_WT	TKS4_WT_T	3904.93	4933.72	0.33738	3904.93	4933.72	0.337379	0.28547	0.6615	0.17947	0.999503	lncRNA	chr20	50292709-50315488	+	ENSG00000203999.9
XLOC_032504	XLOC_032504	LINC01271	34.8932	chr20:50292719-50321342	TKS4_WT	TKS4_WT_T	387.07	522.131	0.431818	387.07	522.131	0.431817	0.117287	0.85625	0.0673994	0.999503	lncRNA	chr20	50299876-50321486	-	ENSG00000233077.2
XLOC_031827	XLOC_031827	LINC01273	43.5245	chr20:50172569-50176671	TKS4_WT	TKS4_WT_T	310.253	445.289	0.521296	310.253	445.289	0.521297	0.316898	0.62745	0.202421	0.999503	lncRNA	chr20	50171809-50176676	+	ENSG00000231742.6
XLOC_032501	XLOC_032501	LINC01275	-2.27569	chr20:50162411-50166301	TKS4_WT	TKS4_WT_T	110.648	108.13	-0.0332093	110.648	108.13	-0.0332105	-0.0166294	0.8887	0.0512448	0.999503	lncRNA	chr20	50162765-50166233	-	ENSG00000237595.6
XLOC_045703	XLOC_045703	LINC01277	55383.8	chr6:142966420-143037582	TKS4_WT	TKS4_WT_T	0	55.4838		0.1	55.4838	9.11592		0.0781	1.10735	0.999503	lncRNA	chr6	142966293-143059682	-	ENSG00000229017.7
XLOC_057052	XLOC_057052	LINC01278	-60.0398	chrX:63426557-63561095	TKS4_WT	TKS4_WT_T	4518.07	1805.43	-1.32336	4518.07	1805.43	-1.32336	-0.979475	0.2033	0.691863	0.999503	lncRNA	chrX	63222993-63561095	-	ENSG00000235437.9
XLOC_019535	XLOC_019535	LINC01290	-88.7552	chr16:10514841-10528198	TKS4_WT	TKS4_WT_T	240.401	27.0326	-3.15267	240.401	27.0326	-3.15267	-2.13853	0.2949	0.530325	0.999503	lncRNA	chr16	10514842-10528202	-	ENSG00000260468.1
XLOC_051674	XLOC_051674	LINC01300	28351.2	chr8:141340548-141344621	TKS4_WT	TKS4_WT_T	0	28.4512		0.1	28.4512	8.15235	0	1	0	1	lncRNA	chr8	141340505-141344621	+	ENSG00000253595.6
XLOC_052241	XLOC_052241	LINC01301	99.7386	chr8:60402170-60413818	TKS4_WT	TKS4_WT_T	365.378	729.801	0.998113	365.378	729.801	0.998113	0.575161	0.43485	0.361661	0.999503	lncRNA	chr8	60289928-60516815	-	ENSG00000251396.8
XLOC_015426	XLOC_015426	LINC01303	110.392	chr14:61556271-61654713	TKS4_WT	TKS4_WT_T	185.276	389.805	1.07307	185.276	389.805	1.07308	0.480625	0.5633	0.24926	0.999503	lncRNA	chr14	61556273-61570653	-	ENSG00000250548.7
XLOC_033517	XLOC_033517	LINC01311	3.20614	chr22:19171705-19172832	TKS4_WT	TKS4_WT_T	3258.75	3363.23	0.0455292	3258.75	3363.23	0.0455288	0.0390267	0.9542	0.0203606	0.999503	lncRNA	chr22	19171395-19172839	+	ENSG00000260924.2
XLOC_034364	XLOC_034364	LINC01315	-56.3072	chr22:42364399-42369208	TKS4_WT	TKS4_WT_T	5239.08	2289.1	-1.19453	5239.08	2289.1	-1.19453	-0.980812	0.2023	0.694004	0.999503	lncRNA	chr22	42364387-42369284	-	ENSG00000229891.3
XLOC_042077	XLOC_042077	LINC01337	-28.3382	chr5:80608619-80622524	TKS4_WT	TKS4_WT_T	79.4041	56.9024	-0.480725	79.4041	56.9024	-0.480724	0	1	0	1	lncRNA	chr5	80608623-80622524	-	ENSG00000251221.1
XLOC_042089	XLOC_042089	LINC01338	29.7385	chr5:82850863-82859836	TKS4_WT	TKS4_WT_T	524.186	680.071	0.375606	524.186	680.071	0.375607	0.211581	0.77015	0.113425	0.999503	lncRNA	chr5	82807475-82860008	-	ENSG00000281327.3
XLOC_040924	XLOC_040924	LINC01340	-99.8933	chr5:97504695-97671051	TKS4_WT	TKS4_WT_T	93.7326	0		93.7326	0.1	-9.87241	0	1	0	1	lncRNA	chr5	97504663-97690180	+	ENSG00000250331.2
XLOC_000032	XLOC_000032	LINC01342	-99.6799	chr1:1137016-1144056	TKS4_WT	TKS4_WT_T	31.2442	0		31.2442	0.1	-8.28744	0	1	0	1	lncRNA	chr1	1137017-1144056	+	ENSG00000223823.1
XLOC_002790	XLOC_002790	LINC01355	-34.4417	chr1:23281308-23285518	TKS4_WT	TKS4_WT_T	4522.45	2964.84	-0.609152	4522.45	2964.84	-0.60915	-0.521265	0.4375	0.359022	0.999503	lncRNA	chr1	23281307-23287488	-	ENSG00000261326.4
XLOC_003264	XLOC_003264	LINC01359	-99.84	chr1:64744972-65067746	TKS4_WT	TKS4_WT_T	62.4884	0		62.4884	0.1	-9.28744	0	1	0	1	lncRNA	chr1	64972225-65002489	-	ENSG00000226891.9
XLOC_003399	XLOC_003399	LINC01364	-99.6222	chr1:87353523-87371655	TKS4_WT	TKS4_WT_T	26.468	0		26.468	0.1	-8.04811	0	1	0	1	lncRNA	chr1	87353521-87371683	-	ENSG00000227290.2
XLOC_041394	XLOC_041394	LINC01366	40.5685	chr5:170331392-170335100	TKS4_WT	TKS4_WT_T	319.805	449.545	0.491271	319.805	449.545	0.491273	0.253479	0.64345	0.191485	0.999503	lncRNA	chr5	170307722-170335508	+	ENSG00000235172.9
XLOC_029551	XLOC_029551	LINC01376	109449	chr2:18986450-19026971	TKS4_WT	TKS4_WT_T	0	109.549		0.1	109.549	10.0974		0.0413	1.38405	0.999503	lncRNA	chr2	18986451-19348067	-	ENSG00000236204.6
XLOC_054294	XLOC_054294	LINC01388	-60.7658	chr9:100992-114246	TKS4_WT	TKS4_WT_T	213.933	83.935	-1.34982	213.933	83.935	-1.34981	-0.439174	0.192	0.716699	0.999503	lncRNA	chr9	112713-113754	-	ENSG00000231808.2
XLOC_003130	XLOC_003130	LINC01389	-99.6222	chr1:47380795-47437317	TKS4_WT	TKS4_WT_T	26.468	0		26.468	0.1	-8.04811	0	1	0	1	lncRNA	chr1	47380928-47408477	-	ENSG00000225762.1
XLOC_037149	XLOC_037149	LINC01391	128.159	chr3:138935188-138944020	TKS4_WT	TKS4_WT_T	84.1803	192.065	1.19004	84.1803	192.065	1.19004	0.505356	0.5268	0.278354	0.999503	lncRNA	chr3	138935189-138944020	-	ENSG00000244578.1
XLOC_048915	XLOC_048915	LINC01393	518.158	chr7:115078957-115231355	TKS4_WT	TKS4_WT_T	26.468	163.614	2.62797	26.468	163.614	2.62798	1.74194	0.21135	0.674998	0.999503	lncRNA	chr7	115030564-115126314	+	ENSG00000225535.7
XLOC_001170	XLOC_001170	LINC01397	26932.6	chr1:110082687-110109719	TKS4_WT	TKS4_WT_T	0	27.0326		0.1	27.0326	8.07856	0	1	0	1	lncRNA	chr1	110082688-110109719	+	ENSG00000258673.1
XLOC_003109	XLOC_003109	LINC01398	56802.4	chr1:46446672-46449704	TKS4_WT	TKS4_WT_T	0	56.9024		0.1	56.9024	9.15235	0	1	0	1	lncRNA	chr1	46446600-46451317	-	ENSG00000224863.3
XLOC_057410	XLOC_057410	LINC01402,RHOXF1	-99.6799	chrX:120036235-120146855	TKS4_WT	TKS4_WT_T	31.2442	0		31.2442	0.1	-8.28744	0	1	0	1	lncRNA,protein_coding
XLOC_011114	XLOC_011114	LINC01405	27.5468	chr12:110936601-110937448	TKS4_WT	TKS4_WT_T	2142.72	2732.97	0.35103	2142.72	2732.97	0.351026	0.293578	0.65335	0.184854	0.999503	lncRNA	chr12	110934590-110959093	+	ENSG00000185847.9
XLOC_000020	XLOC_000020	LINC01409	-61.9389	chr1:778741-809798	TKS4_WT	TKS4_WT_T	444.782	169.289	-1.39361	444.782	169.289	-1.39361	-0.677716	0.26855	0.570975	0.999503	lncRNA	chr1	778747-810065	+	ENSG00000237491.10
XLOC_053566	XLOC_053566	LINC01410	30.2533	chr9:62801464-62813486	TKS4_WT	TKS4_WT_T	190.052	247.549	0.381317	190.052	247.549	0.38132	0.177575	0.81915	0.0866366	0.999503	lncRNA	chr9	62801461-62813486	+	ENSG00000238113.7
XLOC_032997	XLOC_032997	LINC01424	-7.33029	chr21:44802240-44804717	TKS4_WT	TKS4_WT_T	488.166	452.382	-0.10983	488.166	452.382	-0.10983	-0.0629972	0.9283	0.0323116	0.999503	lncRNA	chr21	44801883-44804717	+	ENSG00000236519.2
XLOC_032874	XLOC_032874	LINC01426	-40.844	chr21:34745824-34784886	TKS4_WT	TKS4_WT_T	651.75	385.549	-0.757404	651.75	385.549	-0.757404	-0.493047	0.47315	0.325001	0.999503	lncRNA	chr21	34745757-34784886	+	ENSG00000234380.2
XLOC_032519	XLOC_032519	LINC01429	-99.936	chr20:51831796-51862913	TKS4_WT	TKS4_WT_T	156.221	0		156.221	0.1	-10.6094	0	1	0	1	lncRNA	chr20	51831797-51862912	-	ENSG00000227964.1
XLOC_032211	XLOC_032211	LINC01431	104.266	chr20:23356593-23358127	TKS4_WT	TKS4_WT_T	26.468	54.0652	1.03045	26.468	54.0652	1.03045	0	1	0	1	lncRNA	chr20	23356586-23358175	-	ENSG00000232645.6
XLOC_031394	XLOC_031394	LINC01433	-25.4244	chr20:4193089-4195953	TKS4_WT	TKS4_WT_T	110.648	82.5164	-0.423229	110.648	82.5164	-0.423225	-0.170927	0.79525	0.0994963	0.999503	lncRNA	chr20	4192932-4195953	+	ENSG00000230176.3
XLOC_048311	XLOC_048311	LINC01449	56802.4	chr7:41101603-41149795	TKS4_WT	TKS4_WT_T	0	56.9024		0.1	56.9024	9.15235	0	1	0	1	lncRNA	chr7	41089539-41133507	+	ENSG00000224017.2
XLOC_029645	XLOC_029645	LINC01460	-54.4696	chr2:27705785-27715732	TKS4_WT	TKS4_WT_T	62.4884	28.4512	-1.1351	62.4884	28.4512	-1.1351	0	1	0	1	lncRNA	chr2	27705786-27716738	-	ENSG00000205334.3
XLOC_012018	XLOC_012018	LINC01465	26.7042	chr12:62601750-62603434	TKS4_WT	TKS4_WT_T	1050.96	1331.61	0.341465	1050.96	1331.61	0.341464	0.23676	0.75015	0.124852	0.999503	lncRNA	chr12	62601751-62603690	-	ENSG00000221949.6
XLOC_030886	XLOC_030886	LINC01473	-76.4525	chr2:186033530-186086317	TKS4_WT	TKS4_WT_T	235.625	55.4838	-2.08635	235.625	55.4838	-2.08635	-0.79608	0.30465	0.516199	0.999503	lncRNA	chr2	186032884-186422432	-	ENSG00000237877.7
XLOC_021456	XLOC_021456	LINC01482	-99.84	chr17:68628153-68679606	TKS4_WT	TKS4_WT_T	62.4884	0		62.4884	0.1	-9.28744	0	1	0	1	lncRNA	chr17	68591796-68763882	+	ENSG00000267659.5
XLOC_010883	XLOC_010883	LINC01490	-99.6222	chr12:80763153-80770717	TKS4_WT	TKS4_WT_T	26.468	0		26.468	0.1	-8.04811	0	1	0	1	lncRNA	chr12	80763151-80770717	+	ENSG00000257741.6
XLOC_031112	XLOC_031112	LINC01494	28351.2	chr2:218900813-218930637	TKS4_WT	TKS4_WT_T	0	28.4512		0.1	28.4512	8.15235	0	1	0	1	lncRNA	chr2	218900811-218930636	-	ENSG00000228135.1
XLOC_054135	XLOC_054135	LINC01503	-79.188	chr9:129336922-129347477	TKS4_WT	TKS4_WT_T	526.375	109.549	-2.26451	526.375	109.549	-2.26451	-1.1709	0.31095	0.507309	0.999503	lncRNA	chr9	129332300-129359541	+	ENSG00000233901.7
XLOC_053657	XLOC_053657	LINC01504	122.137	chr9:72305435-72343210	TKS4_WT	TKS4_WT_T	226.073	502.191	1.15145	226.073	502.191	1.15145	0.655387	0.4349	0.361611	0.999503	lncRNA	chr9	72305367-72356721	+	ENSG00000225434.4
XLOC_041587	XLOC_041587	LINC01511	-99.6799	chr5:1363581-1380073	TKS4_WT	TKS4_WT_T	31.2442	0		31.2442	0.1	-8.28744	0	1	0	1	lncRNA	chr5	1353896-1380107	-	ENSG00000250584.4
XLOC_043657	XLOC_043657	LINC01512	82.1215	chr6:43834508-43938207	TKS4_WT	TKS4_WT_T	31.2442	56.9024	0.864901	31.2442	56.9024	0.864901	0	1	0	1	lncRNA	chr6	43891045-43938212	+	ENSG00000289313.1
XLOC_005435	XLOC_005435	LINC01515	-53.7088	chr10:65571424-65787533	TKS4_WT	TKS4_WT_T	298.113	138	-1.11119	298.113	138	-1.11119	-0.497829	0.51915	0.284707	0.999503	lncRNA	chr10	65570338-65880289	+	ENSG00000228065.12
XLOC_005144	XLOC_005144	LINC01516	-99.9244	chr10:25113057-25602229	TKS4_WT	TKS4_WT_T	132.34	0		132.34	0.1	-10.37	0	1	0	1	lncRNA	chr10	25113058-25161236	+	ENSG00000231422.2
XLOC_005178	XLOC_005178	LINC01517	28351.2	chr10:28743649-28808219	TKS4_WT	TKS4_WT_T	0	28.4512		0.1	28.4512	8.15235	0	1	0	1	lncRNA	chr10	28743506-28941910	+	ENSG00000232624.8
XLOC_006361	XLOC_006361	LINC01518	26932.6	chr10:42673012-42691759	TKS4_WT	TKS4_WT_T	0	27.0326		0.1	27.0326	8.07856	0	1	0	1	lncRNA	chr10	42644445-42691723	-	ENSG00000233515.2
XLOC_033689	XLOC_033689	LINC01521	130.108	chr22:31346758-31351155	TKS4_WT	TKS4_WT_T	2433.47	5599.61	1.20231	2433.47	5599.61	1.20231	1.03048	0.14125	0.850012	0.999503	lncRNA	chr22	31346777-31348719	+	ENSG00000213888.3
XLOC_032480	XLOC_032480	LINC01522	528.344	chr20:47980092-47990117	TKS4_WT	TKS4_WT_T	31.2442	196.321	2.65156	31.2442	196.321	2.65155	1.72819	0.2272	0.643592	0.999503	lncRNA	chr20	47976739-47990127	-	ENSG00000237423.3
XLOC_033380	XLOC_033380	LINC01547	30.6482	chr21:44933283-44976976	TKS4_WT	TKS4_WT_T	1558.23	2035.8	0.385686	1558.23	2035.8	0.385688	0.110514	0.8355	0.0780535	0.999503	lncRNA	chr21	44932814-44939941	-	ENSG00000183250.13
XLOC_014282	XLOC_014282	LINC01551	26932.6	chr14:28772703-28830166	TKS4_WT	TKS4_WT_T	0	27.0326		0.1	27.0326	8.07856		0.1204	0.919374	0.999503	lncRNA	chr14	28765640-28823817	+	ENSG00000186960.14
XLOC_040908	XLOC_040908	LINC01554	-81.7879	chr5:95852231-95860133	TKS4_WT	TKS4_WT_T	156.221	28.4512	-2.45703	156.221	28.4512	-2.45703	0	1	0	1	lncRNA	chr5	95838245-95860133	+	ENSG00000236882.8
XLOC_043347	XLOC_043347	LINC01556	19.1552	chr6:28943783-28944538	TKS4_WT	TKS4_WT_T	158.808	189.228	0.252841	158.808	189.228	0.252842	0	1	0	1	lncRNA	chr6	28943877-28944537	+	ENSG00000204709.4
XLOC_055842	XLOC_055842	LINC01560	8.94181	chrX:47444690-47485934	TKS4_WT	TKS4_WT_T	682.994	744.066	0.123557	682.994	744.066	0.123558	0.0229616	0.9496	0.0224593	0.999503	lncRNA	chrX	47483571-47484823	+	ENSG00000196741.5
XLOC_005919	XLOC_005919	LINC01561,PLPP4	159.561	chr10:120456953-120600123	TKS4_WT	TKS4_WT_T	31.2442	81.0978	1.37608	31.2442	81.0978	1.37607	0	1	0	1	lncRNA,protein_coding
XLOC_003148	XLOC_003148	LINC01562	-99.6799	chr1:51195094-51235096	TKS4_WT	TKS4_WT_T	31.2442	0		31.2442	0.1	-8.28744	0	1	0	1	lncRNA	chr1	51195095-51235096	-	ENSG00000203356.2
XLOC_043737	XLOC_043737	LINC01564	-59.1467	chr6:53628379-53631394	TKS4_WT	TKS4_WT_T	132.34	54.0652	-1.29148	132.34	54.0652	-1.29148	0	1	0	1	lncRNA	chr6	53616471-53631400	+	ENSG00000235899.3
XLOC_037048	XLOC_037048	LINC01565	-99.9295	chr3:128571999-128576086	TKS4_WT	TKS4_WT_T	141.893	0		141.893	0.1	-10.4706		0.0336	1.47366	0.999503	lncRNA	chr3	128572000-128576086	-	ENSG00000198685.4
XLOC_019492	XLOC_019492	LINC01569	-32.392	chr16:4245824-4253789	TKS4_WT	TKS4_WT_T	961.605	650.122	-0.564734	961.605	650.122	-0.564734	-0.323998	0.6343	0.197705	0.999503	lncRNA	chr16	4243943-4253847	-	ENSG00000262468.7
XLOC_020127	XLOC_020127	LINC01572	-30.3912	chr16:72280901-72752034	TKS4_WT	TKS4_WT_T	7382.39	5138.79	-0.522658	7382.39	5138.79	-0.522659	-0.392735	0.6259	0.203495	0.999503	lncRNA	chr16	72236281-72665014	-	ENSG00000261008.8
XLOC_016928	XLOC_016928	LINC01583	26932.6	chr15:82088593-82099672	TKS4_WT	TKS4_WT_T	0	27.0326		0.1	27.0326	8.07856	0	1	0	1	lncRNA	chr15	82088569-82097694	+	ENSG00000259518.2
XLOC_017031	XLOC_017031	LINC01585	80997.8	chr15:90529914-90717140	TKS4_WT	TKS4_WT_T	0	81.0978		0.1	81.0978	9.66352	0	1	0	1	lncRNA	chr15	90660207-90664967	+	ENSG00000245479.3
XLOC_015331	XLOC_015331	LINC01588,LINC01599,VCPKMT	-9.21366	chr14:49981668-50116572	TKS4_WT	TKS4_WT_T	27158.6	24656.3	-0.139451	27158.6	24656.3	-0.139453	-0.14856	0.84815	0.0715273	0.999503	lncRNA,-,protein_coding
XLOC_034409	XLOC_034409	LINC01589	-13.1452	chr22:45604431-45605647	TKS4_WT	TKS4_WT_T	610.954	530.643	-0.203323	610.954	530.643	-0.203322	-0.13347	0.84315	0.0740952	0.999503	lncRNA	chr22	45604432-45605621	-	ENSG00000238120.1
XLOC_032265	XLOC_032265	LINC01597	-54.4696	chr20:30278905-30286537	TKS4_WT	TKS4_WT_T	62.4884	28.4512	-1.1351	62.4884	28.4512	-1.1351	0	1	0	1	lncRNA	chr20	30278906-30289956	-	ENSG00000205611.5
XLOC_044473	XLOC_044473	LINC01600	46.536	chr6:2621912-2640559	TKS4_WT	TKS4_WT_T	495.131	725.545	0.551256	495.131	725.545	0.551255	0.303628	0.68055	0.16714	0.999503	lncRNA	chr6	2621911-2634619	-	ENSG00000164385.10
XLOC_051195	XLOC_051195	LINC01602	196221	chr8:57978357-57984126	TKS4_WT	TKS4_WT_T	0	196.321		0.1	196.321	10.939		0.0188	1.72584	0.999503	lncRNA	chr8	57855500-57984126	+	ENSG00000205293.5
XLOC_052087	XLOC_052087	LINC01605	56802.4	chr8:37403515-37599839	TKS4_WT	TKS4_WT_T	0	56.9024		0.1	56.9024	9.15235	0	1	0	1	lncRNA	chr8	37516399-37521447	-	ENSG00000253414.3
XLOC_038890	XLOC_038890	LINC01612	39.88	chr4:170226590-170283723	TKS4_WT	TKS4_WT_T	257.317	359.935	0.484191	257.317	359.935	0.48419	0.287315	0.66885	0.174671	0.999503	lncRNA	chr4	170226535-170284881	+	ENSG00000250266.3
XLOC_045885	XLOC_045885	LINC01615	-53.8408	chr6:169158091-169162989	TKS4_WT	TKS4_WT_T	120.201	55.4838	-1.11531	120.201	55.4838	-1.11531	-0.415377	0.52155	0.282704	0.999503	lncRNA	chr6	169157162-169163007	-	ENSG00000223485.5
XLOC_008910	XLOC_008910	LINC01616	53965.2	chr11:29980119-29982393	TKS4_WT	TKS4_WT_T	0	54.0652		0.1	54.0652	9.07856	0	1	0	1	lncRNA	chr11	29980113-29982392	-	ENSG00000261340.1
XLOC_012190	XLOC_012190	LINC01619	5.97204	chr12:91984975-92145846	TKS4_WT	TKS4_WT_T	35818.6	37957.7	0.0836834	35818.6	37957.7	0.0836836	0.0845369	0.90185	0.0448657	0.999503	lncRNA
XLOC_014667	XLOC_014667	LINC01629	-39.2928	chr14:76959637-76965802	TKS4_WT	TKS4_WT_T	93.7326	56.9024	-0.720061	93.7326	56.9024	-0.720061	0	1	0	1	lncRNA	chr14	76959636-76965802	+	ENSG00000258602.2
XLOC_023526	XLOC_023526	LINC01630	26932.6	chr18:51392041-51562469	TKS4_WT	TKS4_WT_T	0	27.0326		0.1	27.0326	8.07856	0	1	0	1	lncRNA	chr18	51346249-51643939	+	ENSG00000227115.9
XLOC_001919	XLOC_001919	LINC01633	-8.93926	chr1:185001526-185008678	TKS4_WT	TKS4_WT_T	31.2442	28.4512	-0.135099	31.2442	28.4512	-0.135099	0	1	0	1	lncRNA	chr1	184999710-185008789	+	ENSG00000260976.2
XLOC_002779	XLOC_002779	LINC01635	-77.5105	chr1:22023993-22101360	TKS4_WT	TKS4_WT_T	120.201	27.0326	-2.15267	120.201	27.0326	-2.15268	-0.0650928	0.4678	0.32994	0.999503	lncRNA	chr1	22023990-22026048	-	ENSG00000228397.3
XLOC_033554	XLOC_033554	LINC01637	47.7117	chr22:20957091-20964680	TKS4_WT	TKS4_WT_T	372.741	550.582	0.562783	372.741	550.582	0.562784	0.359219	0.6008	0.22127	0.999503	lncRNA	chr22	20957092-20964679	+	ENSG00000237476.1
XLOC_000168	XLOC_000168	LINC01647	18.2911	chr1:11609530-11613355	TKS4_WT	TKS4_WT_T	137.116	162.196	0.242334	137.116	162.196	0.242341	0.152641	0.87695	0.0570252	0.999503	lncRNA	chr1	11609468-11613358	+	ENSG00000235643.2
XLOC_001839	XLOC_001839	LINC01657	55383.8	chr1:175866079-175917906	TKS4_WT	TKS4_WT_T	0	55.4838		0.1	55.4838	9.11592		0.2358	0.627456	0.999503	lncRNA	chr1	175877343-175880468	+	ENSG00000224718.1
XLOC_033326	XLOC_033326	LINC01671	26932.6	chr21:42599403-42615095	TKS4_WT	TKS4_WT_T	0	27.0326		0.1	27.0326	8.07856	0	1	0	1	lncRNA	chr21	42599280-42615058	-	ENSG00000225431.1
XLOC_033009	XLOC_033009	LINC01694	343.505	chr21:45586933-45615803	TKS4_WT	TKS4_WT_T	896.529	3976.15	2.14895	896.529	3976.15	2.14895	1.27205	0.1007	0.996971	0.999503	lncRNA	chr21	45590771-45603088	+	ENSG00000233922.4
XLOC_002240	XLOC_002240	LINC01703	77.5807	chr1:226083574-226090289	TKS4_WT	TKS4_WT_T	93.7326	166.451	0.828479	93.7326	166.451	0.828475	0.505819	0.39335	0.405221	0.999503	lncRNA	chr1	226083590-226090465	+	ENSG00000225518.3
XLOC_031901	XLOC_031901	LINC01711	-99.84	chr20:58634771-58635738	TKS4_WT	TKS4_WT_T	62.4884	0		62.4884	0.1	-9.28744	0	1	0	1	lncRNA	chr20	58634772-58635738	+	ENSG00000268941.2
XLOC_001361	XLOC_001361	LINC01719	-23.4613	chr1:146052595-146058799	TKS4_WT	TKS4_WT_T	360.602	276	-0.385736	360.602	276	-0.385739	-0.216157	0.7489	0.125576	0.999503	lncRNA	chr1	146052566-146061952	+	ENSG00000233396.9
XLOC_031387	XLOC_031387	LINC01730	-55.021	chr20:3808493-3812434	TKS4_WT	TKS4_WT_T	120.201	54.0652	-1.15267	120.201	54.0652	-1.15268	-0.687464	0.32965	0.481947	0.999503	lncRNA	chr20	3808357-3812434	+	ENSG00000275491.1
XLOC_031552	XLOC_031552	LINC01733	28351.2	chr20:25955811-25969288	TKS4_WT	TKS4_WT_T	0	28.4512		0.1	28.4512	8.15235	0	1	0	1	lncRNA	chr20	25955795-25969288	+	ENSG00000226203.2
XLOC_000685	XLOC_000685	LINC01738	-99.8741	chr1:47688497-47704077	TKS4_WT	TKS4_WT_T	79.4041	0		79.4041	0.1	-9.63307	0	1	0	1	lncRNA	chr1	47688463-47704029	+	ENSG00000227947.2
XLOC_031894	XLOC_031894	LINC01742	-64.1691	chr20:58003903-58004648	TKS4_WT	TKS4_WT_T	79.4041	28.4512	-1.48073	79.4041	28.4512	-1.48072	0	1	0	1	lncRNA	chr20	58003904-58004648	+	ENSG00000275852.1
XLOC_001197	XLOC_001197	LINC01750	-48.9335	chr1:111990535-111998842	TKS4_WT	TKS4_WT_T	52.9361	27.0326	-0.969551	52.9361	27.0326	-0.969552	0	1	0	1	lncRNA	chr1	111989770-111998842	+	ENSG00000231437.3
XLOC_032471	XLOC_032471	LINC01754	427.535	chr20:47382765-47412144	TKS4_WT	TKS4_WT_T	57.7122	304.452	2.39926	57.7122	304.452	2.39927	0.767775	0.0425	1.37161	0.999503	lncRNA	chr20	47391925-47412327	-	ENSG00000224565.2
XLOC_002884	XLOC_002884	LINC01756	56802.4	chr1:29329619-29350114	TKS4_WT	TKS4_WT_T	0	56.9024		0.1	56.9024	9.15235	0	1	0	1	lncRNA	chr1	29329620-29350114	-	ENSG00000230523.1
XLOC_001058	XLOC_001058	LINC01761	28351.2	chr1:95474736-95479356	TKS4_WT	TKS4_WT_T	0	28.4512		0.1	28.4512	8.15235	0	1	0	1	lncRNA	chr1	95474737-95479356	+	ENSG00000233907.1
XLOC_001013	XLOC_001013	LINC01763	56802.4	chr1:90851758-90854899	TKS4_WT	TKS4_WT_T	0	56.9024		0.1	56.9024	9.15235	0	1	0	1	lncRNA	chr1	90851122-90855253	+	ENSG00000225446.3
XLOC_002527	XLOC_002527	LINC01770	10.0981	chr1:1425870-1435626	TKS4_WT	TKS4_WT_T	637.023	701.35	0.138788	637.023	701.35	0.138789	0.0645505	0.95005	0.0222535	0.999503	lncRNA	chr1	1430539-1434573	-	ENSG00000225285.1
XLOC_000241	XLOC_000241	LINC01772	-55.5568	chr1:16460947-16492701	TKS4_WT	TKS4_WT_T	1786.09	793.796	-1.16997	1786.09	793.796	-1.16996	-0.445074	0.62955	0.20097	0.999503	lncRNA	chr1	16460948-16468481	+	ENSG00000226029.1
XLOC_025532	XLOC_025532	LINC01775	-99.84	chr19:2458936-2462185	TKS4_WT	TKS4_WT_T	62.4884	0		62.4884	0.1	-9.28744	0	1	0	1	lncRNA	chr19	2458935-2462185	-	ENSG00000267201.1
XLOC_001076	XLOC_001076	LINC01776	82416.4	chr1:98210710-98272658	TKS4_WT	TKS4_WT_T	0	82.5164		0.1	82.5164	9.68854		0.06275	1.20239	0.999503	lncRNA	chr1	98210747-98272658	+	ENSG00000226053.1
XLOC_002715	XLOC_002715	LINC01783,RNU1-6P,TRE-TTC4-1	107.386	chr1:16533890-16535652	TKS4_WT	TKS4_WT_T	1989.48	4125.9	1.05232	1989.48	4125.9	1.05232	0.753114	0.29375	0.532022	0.999503	lncRNA,snRNA,-
XLOC_000038	XLOC_000038	LINC01786	-22.4271	chr1:1274001-1279447	TKS4_WT	TKS4_WT_T	1182.9	917.61	-0.366376	1182.9	917.61	-0.366375	-0.275464	0.69175	0.160051	0.999503	lncRNA	chr1	1275223-1280420	+	ENSG00000230415.1
XLOC_030971	XLOC_030971	LINC01792	-25.4244	chr2:200695722-200827338	TKS4_WT	TKS4_WT_T	110.648	82.5164	-0.423229	110.648	82.5164	-0.423225	-0.00405294	0.80535	0.0940153	0.999503	lncRNA	chr2	200711535-200735203	-	ENSG00000237166.3
XLOC_029921	XLOC_029921	LINC01800	-99.84	chr2:64846129-64863631	TKS4_WT	TKS4_WT_T	62.4884	0		62.4884	0.1	-9.28744	0	1	0	1	lncRNA	chr2	64846130-64863626	-	ENSG00000234572.1
XLOC_026017	XLOC_026017	LINC01801	-64.9378	chr19:34816153-34832869	TKS4_WT	TKS4_WT_T	312.442	109.549	-1.51201	312.442	109.549	-1.51201	-0.900315	0.5238	0.280835	0.999503	lncRNA	chr19	34788527-34832869	-	ENSG00000267767.3
XLOC_031141	XLOC_031141	LINC01803	-8.93926	chr2:219904050-219904889	TKS4_WT	TKS4_WT_T	31.2442	28.4512	-0.135099	31.2442	28.4512	-0.135099	0	1	0	1	lncRNA	chr2	219903900-219904923	-	ENSG00000228909.2
XLOC_028806	XLOC_028806	LINC01806	46.0825	chr2:161067772-161254643	TKS4_WT	TKS4_WT_T	8801.12	12856.9	0.546781	8801.12	12856.9	0.546784	0.248713	0.8551	0.0679831	0.999503	lncRNA	chr2	161244720-161249095	+	ENSG00000227403.3
XLOC_031191	XLOC_031191	LINC01807	-67.932	chr2:228483258-228611395	TKS4_WT	TKS4_WT_T	257.317	82.5164	-1.64079	257.317	82.5164	-1.64079	-0.588332	0.45195	0.34491	0.999503	lncRNA	chr2	228475224-228841689	-	ENSG00000232023.3
XLOC_029487	XLOC_029487	LINC01814	-62.0988	chr2:8559832-8583792	TKS4_WT	TKS4_WT_T	1524	577.615	-1.39968	1524	577.615	-1.39968	-0.941146	0.16065	0.794119	0.999503	lncRNA	chr2	8461703-8592903	-	ENSG00000236008.4
XLOC_028556	XLOC_028556	LINC01823	55383.8	chr2:121790443-121809946	TKS4_WT	TKS4_WT_T	0	55.4838		0.1	55.4838	9.11592		0.0066	2.18046	0.71528	lncRNA	chr2	121779133-121809962	+	ENSG00000224655.7
XLOC_029943	XLOC_029943	LINC01829	-99.8741	chr2:67086445-67289244	TKS4_WT	TKS4_WT_T	79.4041	0		79.4041	0.1	-9.63307	0	1	0	1	lncRNA	chr2	67123357-67397980	-	ENSG00000236780.7
XLOC_028687	XLOC_028687	LINC01832	-99.6799	chr2:138101883-138105905	TKS4_WT	TKS4_WT_T	31.2442	0		31.2442	0.1	-8.28744	0	1	0	1	lncRNA	chr2	138101878-138107178	+	ENSG00000224231.2
XLOC_029780	XLOC_029780	LINC01833	-47.3482	chr2:44921079-44939199	TKS4_WT	TKS4_WT_T	918.62	483.67	-0.925444	918.62	483.67	-0.925445	-0.997668	0.5343	0.272215	0.999503	lncRNA	chr2	44921077-44939199	-	ENSG00000259439.3
XLOC_024253	XLOC_024253	LINC01836	-67.4659	chr19:782799-785237	TKS4_WT	TKS4_WT_T	336.721	109.549	-1.61998	336.721	109.549	-1.61998	-0.785487	0.2648	0.577082	0.999503	lncRNA	chr19	782755-786092	+	ENSG00000267530.4
XLOC_037476	XLOC_037476	LINC01840	26932.6	chr3:184504712-184556918	TKS4_WT	TKS4_WT_T	0	27.0326		0.1	27.0326	8.07856	0	1	0	1	lncRNA	chr3	184546714-184556918	-	ENSG00000230215.1
XLOC_025784	XLOC_025784	LINC01841	82.1215	chr19:14305457-14363990	TKS4_WT	TKS4_WT_T	31.2442	56.9024	0.864901	31.2442	56.9024	0.864901	0	1	0	1	lncRNA	chr19	14305458-14370196	-	ENSG00000266913.1
XLOC_024550	XLOC_024550	LINC01842	31.6504	chr19:14305457-14363990	TKS4_WT	TKS4_WT_T	447.369	588.963	0.396711	447.369	588.963	0.396712	0.231079	0.75785	0.120417	0.999503	lncRNA	chr19	14333743-14343916	+	ENSG00000267147.2
XLOC_041128	XLOC_041128	LINC01843	-86.0793	chr5:134506551-134509230	TKS4_WT	TKS4_WT_T	204.381	28.4512	-2.8447	204.381	28.4512	-2.8447	-1.77889	0.322	0.492144	0.999503	lncRNA	chr5	134506552-134509229	+	ENSG00000251169.2
XLOC_041215	XLOC_041215	LINC01844	327.672	chr5:142745599-142760993	TKS4_WT	TKS4_WT_T	276.422	1182.18	2.09651	276.422	1182.18	2.09651	1.2133	0.1117	0.951947	0.999503	lncRNA	chr5	142716229-142761035	+	ENSG00000236714.3
XLOC_040973	XLOC_040973	LINC01848	-99.6799	chr5:109883181-109885495	TKS4_WT	TKS4_WT_T	31.2442	0		31.2442	0.1	-8.28744	0	1	0	1	lncRNA	chr5	109883182-109884751	+	ENSG00000254106.1
XLOC_017342	XLOC_017342	LINC01852	50.4447	chr15:38068811-38072990	TKS4_WT	TKS4_WT_T	384.881	579.033	0.589234	384.881	579.033	0.589233	0.307225	0.6349	0.197295	0.999503	lncRNA	chr15	38068812-38072990	-	ENSG00000236914.4
XLOC_027602	XLOC_027602	LINC01865	168.642	chr2:316283-337054	TKS4_WT	TKS4_WT_T	31.2442	83.935	1.42568	31.2442	83.935	1.42568	0.821968	0.2562	0.591421	0.999503	lncRNA	chr2	317912-342118	+	ENSG00000233684.2
XLOC_030670	XLOC_030670	LINC01876	-5.98316	chr2:156020534-156254931	TKS4_WT	TKS4_WT_T	4610.61	4334.75	-0.0890084	4610.61	4334.75	-0.0890088	-0.0693748	0.92485	0.0339287	0.999503	lncRNA	chr2	156011530-156254950	-	ENSG00000226383.7
XLOC_031207	XLOC_031207	LINC01907	28351.2	chr2:230690920-230700529	TKS4_WT	TKS4_WT_T	0	28.4512		0.1	28.4512	8.15235	0	1	0	1	lncRNA	chr2	230690065-230700529	-	ENSG00000226125.2
XLOC_023641	XLOC_023641	LINC01909	-2.69356	chr18:70335438-70352459	TKS4_WT	TKS4_WT_T	257.317	250.386	-0.0393906	257.317	250.386	-0.0393929	-0.0107046	0.8233	0.0844419	0.999503	lncRNA	chr18	70335439-70352459	+	ENSG00000266258.1
XLOC_024136	XLOC_024136	LINC01910	3.93767	chr18:70380139-70384591	TKS4_WT	TKS4_WT_T	2192.67	2279.01	0.0557222	2192.67	2279.01	0.0557186	0.0408448	0.95635	0.0193831	0.999503	lncRNA	chr18	70380140-70384591	-	ENSG00000266278.1
XLOC_028726	XLOC_028726	LINC01911,LOC105373668	-99.6799	chr2:146837767-146878223	TKS4_WT	TKS4_WT_T	31.2442	0		31.2442	0.1	-8.28744	0	1	0	1	lncRNA,-
XLOC_024048	XLOC_024048	LINC01917	28351.2	chr18:53568446-53597851	TKS4_WT	TKS4_WT_T	0	28.4512		0.1	28.4512	8.15235	0	1	0	1	lncRNA	chr18	53480825-53581107	-	ENSG00000260433.3
XLOC_041296	XLOC_041296	LINC01933	80997.8	chr5:151958897-152270449	TKS4_WT	TKS4_WT_T	0	81.0978		0.1	81.0978	9.66352	0	1	0	1	lncRNA	chr5	151949571-152270449	+	ENSG00000254226.6
XLOC_030129	XLOC_030129	LINC01943	164933	chr2:87439522-87521518	TKS4_WT	TKS4_WT_T	0	165.033		0.1	165.033	10.6885		0.13	0.886057	0.999503	lncRNA	chr2	87439523-87459044	-	ENSG00000280721.1
XLOC_042115	XLOC_042115	LINC01949	85253.6	chr5:87120147-87248021	TKS4_WT	TKS4_WT_T	0	85.3536		0.1	85.3536	9.73731	0	1	0	1	lncRNA	chr5	87205408-87240145	-	ENSG00000288569.1
XLOC_028501	XLOC_028501	LINC01961	-8.93926	chr2:113501545-113515481	TKS4_WT	TKS4_WT_T	62.4884	56.9024	-0.135099	62.4884	56.9024	-0.135099	0	1	0	1	lncRNA	chr2	113512222-113515488	+	ENSG00000234148.3
XLOC_029171	XLOC_029171	LINC01963	2.60426	chr2:216216888-216220192	TKS4_WT	TKS4_WT_T	17644.2	18103.7	0.0370901	17644.2	18103.7	0.0370906	0.0379985	0.95645	0.0193377	0.999503	lncRNA	chr2	216217045-216220192	+	ENSG00000260804.3
XLOC_036130	XLOC_036130	LINC01968	-6.06755	chr3:194705547-194826859	TKS4_WT	TKS4_WT_T	151.445	142.256	-0.0903028	151.445	142.256	-0.0903044	-0.044423	0.76875	0.114215	0.999503	lncRNA	chr3	194708093-194826008	+	ENSG00000237222.4
XLOC_022840	XLOC_022840	LINC01970	79.6702	chr17:82290045-82292814	TKS4_WT	TKS4_WT_T	524.186	941.806	0.84535	524.186	941.806	0.845351	0.566512	0.4362	0.360314	0.999503	lncRNA	chr17	82290046-82292814	-	ENSG00000265692.1
XLOC_022403	XLOC_022403	LINC01974	-99.6222	chr17:46500212-47100283	TKS4_WT	TKS4_WT_T	26.468	0		26.468	0.1	-8.04811	0	1	0	1	lncRNA	chr17	46909742-46911512	-	ENSG00000262031.1
XLOC_021159	XLOC_021159	LINC01976	381.44	chr17:43938260-43938962	TKS4_WT	TKS4_WT_T	137.116	660.131	2.26735	137.116	660.131	2.26736	1.19368	0.1499	0.824198	0.999503	lncRNA	chr17	43938257-43938963	+	ENSG00000261514.2
XLOC_021588	XLOC_021588	LINC01977	28351.2	chr17:79823451-79827704	TKS4_WT	TKS4_WT_T	0	28.4512		0.1	28.4512	8.15235	0	1	0	1	lncRNA	chr17	79819083-79827704	+	ENSG00000262772.2
XLOC_021589	XLOC_021589	LINC01978	28351.2	chr17:79915251-79926725	TKS4_WT	TKS4_WT_T	0	28.4512		0.1	28.4512	8.15235	0	1	0	1	lncRNA	chr17	79919310-79925999	+	ENSG00000262188.3
XLOC_022785	XLOC_022785	LINC01979	-88.6174	chr17:79915251-79926725	TKS4_WT	TKS4_WT_T	249.953	28.4512	-3.1351	249.953	28.4512	-3.1351	0	1	0	1	lncRNA	chr17	79915252-79926725	-	ENSG00000262585.1
XLOC_036358	XLOC_036358	LINC01981	34.3419	chr3:27797587-27860325	TKS4_WT	TKS4_WT_T	266.869	358.517	0.425908	266.869	358.517	0.42591	0.221613	0.7392	0.131238	0.999503	lncRNA	chr3	27830886-27834136	-	ENSG00000229243.2
XLOC_034915	XLOC_034915	LINC01985	26932.6	chr3:30518867-30527193	TKS4_WT	TKS4_WT_T	0	27.0326		0.1	27.0326	8.07856	0	1	0	1	lncRNA	chr3	30518833-30527193	+	ENSG00000227260.2
XLOC_022758	XLOC_022758	LINC01987	-99.8111	chr17:77722871-77728559	TKS4_WT	TKS4_WT_T	52.9361	0		52.9361	0.1	-9.04811	0	1	0	1	lncRNA	chr17	77722872-77728559	-	ENSG00000267790.1
XLOC_035478	XLOC_035478	LINC01990	26932.6	chr3:107430929-107463912	TKS4_WT	TKS4_WT_T	0	27.0326		0.1	27.0326	8.07856	0	1	0	1	lncRNA	chr3	107430892-107463912	+	ENSG00000273125.2
XLOC_021362	XLOC_021362	LINC01999	-99.6799	chr17:60564545-60586620	TKS4_WT	TKS4_WT_T	31.2442	0		31.2442	0.1	-8.28744	0	1	0	1	lncRNA	chr17	60564547-60586623	+	ENSG00000267772.1
XLOC_037265	XLOC_037265	LINC02006	85253.6	chr3:153383549-153762526	TKS4_WT	TKS4_WT_T	0	85.3536		0.1	85.3536	9.73731	0	1	0	1	lncRNA	chr3	153384934-153980186	-	ENSG00000238755.3
XLOC_035353	XLOC_035353	LINC02008	18.5918	chr3:81986141-82463675	TKS4_WT	TKS4_WT_T	1570.37	1862.33	0.246007	1570.37	1862.33	0.246004	0.183519	0.80155	0.0960694	0.999503	lncRNA	chr3	81986138-82463675	+	ENSG00000239440.6
XLOC_036494	XLOC_036494	LINC02009	-64.1691	chr3:46416515-46423667	TKS4_WT	TKS4_WT_T	79.4041	28.4512	-1.48073	79.4041	28.4512	-1.48072	0	1	0	1	lncRNA	chr3	46416524-46423591	-	ENSG00000283646.2
XLOC_037615	XLOC_037615	LINC02012	84.2927	chr3:197505261-197509661	TKS4_WT	TKS4_WT_T	440.006	810.899	0.881999	440.006	810.899	0.881999	0.585697	0.4005	0.397397	0.999503	lncRNA	chr3	197505262-197506986	-	ENSG00000272989.1
XLOC_037072	XLOC_037072	LINC02014	-44.8744	chr3:130081830-130111433	TKS4_WT	TKS4_WT_T	247.765	136.582	-0.859208	247.765	136.582	-0.859205	-0.281001	0.6616	0.179405	0.999503	lncRNA	chr3	130089433-130094304	-	ENSG00000248243.1
XLOC_035983	XLOC_035983	LINC02015	28351.2	chr3:177816864-177899224	TKS4_WT	TKS4_WT_T	0	28.4512		0.1	28.4512	8.15235	0	1	0	1	lncRNA	chr3	177816865-177899224	+	ENSG00000231574.6
XLOC_035324	XLOC_035324	LINC02018	-44.1651	chr3:75435307-75512177	TKS4_WT	TKS4_WT_T	298.113	166.451	-0.840761	298.113	166.451	-0.840762	-0.319182	0.75985	0.119272	0.999503	lncRNA	chr3	75435232-75538029	+	ENSG00000272690.6
XLOC_035146	XLOC_035146	LINC02019	195.52	chr3:50669988-50672069	TKS4_WT	TKS4_WT_T	901.704	2664.72	1.56326	901.704	2664.72	1.56326	1.08704	0.1589	0.798876	0.999503	lncRNA	chr3	50669989-50672048	+	ENSG00000273356.1
XLOC_035688	XLOC_035688	LINC02021	318.973	chr3:130111706-130120569	TKS4_WT	TKS4_WT_T	120.201	503.61	2.06686	120.201	503.61	2.06686	0.940121	0.11665	0.933115	0.999503	lncRNA	chr3	130111669-130201336	+	ENSG00000249846.7
XLOC_037551	XLOC_037551	LINC02026	75.3109	chr3:193957371-194003659	TKS4_WT	TKS4_WT_T	62.4884	109.549	0.809917	62.4884	109.549	0.809916	0.406154	0.608	0.216096	0.999503	lncRNA	chr3	193957372-194003760	-	ENSG00000214146.3
XLOC_037553	XLOC_037553	LINC02028	28351.2	chr3:194005455-194123474	TKS4_WT	TKS4_WT_T	0	28.4512		0.1	28.4512	8.15235	0	1	0	1	lncRNA	chr3	194005259-194071025	-	ENSG00000230102.8
XLOC_035865	XLOC_035865	LINC02029	1.19018	chr3:157081666-157123002	TKS4_WT	TKS4_WT_T	216.521	219.098	0.0170726	216.521	219.098	0.0170694	0.00532426	0.8461	0.0725783	0.999503	lncRNA	chr3	157081738-157088547	+	ENSG00000241544.2
XLOC_035604	XLOC_035604	LINC02035,SLC49A4	-20.5248	chr3:122795057-122892416	TKS4_WT	TKS4_WT_T	30850	24518.1	-0.331423	30850	24518.1	-0.331423	-0.331069	0.63555	0.19685	0.999503	lncRNA,protein_coding
XLOC_037556	XLOC_037556	LINC02036	631.01	chr3:194203015-194257772	TKS4_WT	TKS4_WT_T	79.4041	580.452	2.86989	79.4041	580.452	2.86989	2.72865	0.24375	0.613055	0.999503	lncRNA	chr3	194202392-194250203	-	ENSG00000225742.6
XLOC_036086	XLOC_036086	LINC02041	143.472	chr3:187447045-187449949	TKS4_WT	TKS4_WT_T	146.669	357.098	1.28376	146.669	357.098	1.28376	0.575836	0.47025	0.327671	0.999503	lncRNA	chr3	187448845-187449450	+	ENSG00000228952.1
XLOC_037499	XLOC_037499	LINC02043	20.7886	chr3:186810879-186825521	TKS4_WT	TKS4_WT_T	115.424	139.419	0.272476	115.424	139.419	0.272484	0.113826	0.8663	0.0623317	0.999503	lncRNA	chr3	186810880-186825521	-	ENSG00000232233.1
XLOC_036124	XLOC_036124	LINC02048	56802.4	chr3:194276587-194291532	TKS4_WT	TKS4_WT_T	0	56.9024		0.1	56.9024	9.15235	0	1	0	1	lncRNA	chr3	194276682-194287368	+	ENSG00000228271.2
XLOC_042147	XLOC_042147	LINC02058	81.758	chr5:92906704-92939786	TKS4_WT	TKS4_WT_T	338.91	615.996	0.862019	338.91	615.996	0.862019	0.493489	0.48425	0.31493	0.999503	lncRNA	chr5	92907180-92939591	-	ENSG00000248528.1
XLOC_041947	XLOC_041947	LINC02065	-20.7952	chr5:66205122-66209446	TKS4_WT	TKS4_WT_T	141.893	112.386	-0.336334	141.893	112.386	-0.336341	-0.145059	0.83765	0.0769374	0.999503	lncRNA	chr5	66205120-66209893	-	ENSG00000248846.3
XLOC_035899	XLOC_035899	LINC02067	-67.0104	chr3:161426426-161448242	TKS4_WT	TKS4_WT_T	418.314	138	-1.59992	418.314	138	-1.59992	-0.26802	0.54455	0.263962	0.999503	lncRNA	chr3	161426427-161448242	+	ENSG00000240567.1
XLOC_037478	XLOC_037478	LINC02069	-99.8741	chr3:184756388-184773155	TKS4_WT	TKS4_WT_T	79.4041	0		79.4041	0.1	-9.63307	0	1	0	1	lncRNA	chr3	184725013-184773178	-	ENSG00000229433.2
XLOC_021288	XLOC_021288	LINC02073	77.5811	chr17:51435426-51445802	TKS4_WT	TKS4_WT_T	31.2442	55.4838	0.828479	31.2442	55.4838	0.828478	0.395047	0.3489	0.457299	0.999503	lncRNA	chr17	51336646-51521401	+	ENSG00000267452.3
XLOC_021549	XLOC_021549	LINC02080	-19.057	chr17:76734114-76807102	TKS4_WT	TKS4_WT_T	281.198	227.61	-0.305024	281.198	227.61	-0.305022	0	1	0	1	lncRNA	chr17	76799044-76807102	+	ENSG00000267065.2
XLOC_034904	XLOC_034904	LINC02084	108030	chr3:27712180-27714006	TKS4_WT	TKS4_WT_T	0	108.13		0.1	108.13	10.0786	0	1	0	1	lncRNA	chr3	27712910-27714005	+	ENSG00000272282.1
XLOC_021236	XLOC_021236	LINC02086	20.4682	chr17:48655661-48707346	TKS4_WT	TKS4_WT_T	1666.29	2007.35	0.268649	1666.29	2007.35	0.268653	0.195951	0.7598	0.119301	0.999503	lncRNA	chr17	48646923-48707346	+	ENSG00000244649.5
XLOC_041618	XLOC_041618	LINC02102	80997.8	chr5:6686324-6707711	TKS4_WT	TKS4_WT_T	0	81.0978		0.1	81.0978	9.66352	0	1	0	1	lncRNA	chr5	6686325-6707711	-	ENSG00000248677.2
XLOC_040565	XLOC_040565	LINC02104	82416.4	chr5:39520430-39524708	TKS4_WT	TKS4_WT_T	0	82.5164		0.1	82.5164	9.68854		0.06275	1.20239	0.999503	lncRNA	chr5	39520398-39524726	+	ENSG00000271334.6
XLOC_041855	XLOC_041855	LINC02105	114.986	chr5:53776049-53819682	TKS4_WT	TKS4_WT_T	26.468	56.9024	1.10424	26.468	56.9024	1.10424	0	1	0	1	lncRNA	chr5	53776048-53819722	-	ENSG00000250447.6
XLOC_041905	XLOC_041905	LINC02108	56802.4	chr5:58541566-58558243	TKS4_WT	TKS4_WT_T	0	56.9024		0.1	56.9024	9.15235	0	1	0	1	lncRNA	chr5	58541567-58558243	-	ENSG00000250127.1
XLOC_042017	XLOC_042017	LINC02122	-99.6222	chr5:74034262-74103216	TKS4_WT	TKS4_WT_T	26.468	0		26.468	0.1	-8.04811	0	1	0	1	lncRNA	chr5	74084068-74103216	-	ENSG00000248474.1
XLOC_020109	XLOC_020109	LINC02136	-99.8267	chr16:71410440-71426464	TKS4_WT	TKS4_WT_T	57.7122	0		57.7122	0.1	-9.17273		0.0702	1.15366	0.999503	lncRNA	chr16	71366933-71426464	-	ENSG00000261348.2
XLOC_019067	XLOC_019067	LINC02137	108030	chr16:58421325-58462858	TKS4_WT	TKS4_WT_T	0	108.13		0.1	108.13	10.0786	0	1	0	1	lncRNA	chr16	58421326-58462470	+	ENSG00000260186.5
XLOC_041672	XLOC_041672	LINC02150	195.756	chr5:16373360-16441102	TKS4_WT	TKS4_WT_T	84.1803	248.968	1.5644	84.1803	248.968	1.56441	0.656873	0.4532	0.34371	0.999503	lncRNA	chr5	16373361-16440081	-	ENSG00000248150.1
XLOC_056728	XLOC_056728	LINC02154	28351.2	chrX:13266047-13303452	TKS4_WT	TKS4_WT_T	0	28.4512		0.1	28.4512	8.15235	0	1	0	1	lncRNA	chrX	13266041-13303452	-	ENSG00000235385.3
XLOC_040958	XLOC_040958	LINC02163	4.46268	chr5:104080907-104104287	TKS4_WT	TKS4_WT_T	512.047	534.898	0.0629895	512.047	534.898	0.0629876	0.0302701	0.96895	0.0136986	0.999503	lncRNA	chr5	104079847-104406121	+	ENSG00000251026.2
XLOC_020279	XLOC_020279	LINC02166	74.8644	chr16:89682506-89686533	TKS4_WT	TKS4_WT_T	110.648	193.484	0.806233	110.648	193.484	0.806237	0.348906	0.708	0.149967	0.999503	lncRNA	chr16	89682620-89686569	-	ENSG00000260259.1
XLOC_019942	XLOC_019942	LINC02169	-99.6799	chr16:54245543-54270879	TKS4_WT	TKS4_WT_T	31.2442	0		31.2442	0.1	-8.28744	0	1	0	1	lncRNA	chr16	54245544-54270879	-	ENSG00000259517.3
XLOC_018734	XLOC_018734	LINC02175	-55.6048	chr16:25066886-25068955	TKS4_WT	TKS4_WT_T	124.977	55.4838	-1.17152	124.977	55.4838	-1.17152	-0.452854	0.4789	0.319755	0.999503	lncRNA	chr16	25066937-25088618	+	ENSG00000262155.2
XLOC_019364	XLOC_019364	LINC02193	-87.6754	chr16:90186120-90225200	TKS4_WT	TKS4_WT_T	230.849	28.4512	-3.02039	230.849	28.4512	-3.02039	-0.913824	0.216	0.665546	0.999503	lncRNA	chr16	90173217-90222851	+	ENSG00000260923.7
XLOC_041993	XLOC_041993	LINC02197	80997.8	chr5:71289892-71446756	TKS4_WT	TKS4_WT_T	0	81.0978		0.1	81.0978	9.66352	0	1	0	1	lncRNA	chr5	71337182-71446772	-	ENSG00000250387.3
XLOC_041965	XLOC_041965	LINC02198,RN7SKP251	26932.6	chr5:68960539-69029927	TKS4_WT	TKS4_WT_T	0	27.0326		0.1	27.0326	8.07856	0	1	0	1	lncRNA,misc_RNA
XLOC_041337	XLOC_041337	LINC02202	82416.4	chr5:159100482-159117478	TKS4_WT	TKS4_WT_T	0	82.5164		0.1	82.5164	9.68854		0.0667	1.17587	0.999503	lncRNA	chr5	159100483-159117478	+	ENSG00000245812.4
XLOC_017676	XLOC_017676	LINC02204	-64.3006	chr15:70570957-70586606	TKS4_WT	TKS4_WT_T	302.89	108.13	-1.48602	302.89	108.13	-1.48603	-1.02777	0.2184	0.660747	0.999503	lncRNA	chr15	70570958-70586606	-	ENSG00000280639.1
XLOC_042284	XLOC_042284	LINC02208	73.0408	chr5:118350965-118562117	TKS4_WT	TKS4_WT_T	31.2442	54.0652	0.791113	31.2442	54.0652	0.791112	0	1	0	1	lncRNA	chr5	118000253-118562199	-	ENSG00000250891.3
XLOC_041642	XLOC_041642	LINC02212	-99.6799	chr5:10493526-10502728	TKS4_WT	TKS4_WT_T	31.2442	0		31.2442	0.1	-8.28744	0	1	0	1	lncRNA	chr5	10493291-10502728	-	ENSG00000249396.2
XLOC_041899	XLOC_041899	LINC02225	53965.2	chr5:57890330-57899162	TKS4_WT	TKS4_WT_T	0	54.0652		0.1	54.0652	9.07856	0	1	0	1	lncRNA	chr5	57890327-57899162	-	ENSG00000249584.1
XLOC_040926	XLOC_040926	LINC02234	112286	chr5:97840757-97923475	TKS4_WT	TKS4_WT_T	0	112.386		0.1	112.386	10.1342		0.03885	1.41061	0.999503	lncRNA	chr5	97840912-97923497	+	ENSG00000248202.2
XLOC_051349	XLOC_051349	LINC02235	-99.6799	chr8:81842618-81923660	TKS4_WT	TKS4_WT_T	31.2442	0		31.2442	0.1	-8.28744	0	1	0	1	lncRNA	chr8	81841952-81924348	+	ENSG00000254689.3
XLOC_040390	XLOC_040390	LINC02236	-99.6799	chr5:6795879-6826728	TKS4_WT	TKS4_WT_T	31.2442	0		31.2442	0.1	-8.28744	0	1	0	1	lncRNA	chr5	6765891-6833120	+	ENSG00000251365.5
XLOC_056460	XLOC_056460	LINC02243	85253.6	chrX:134949548-134953382	TKS4_WT	TKS4_WT_T	0	85.3536		0.1	85.3536	9.73731	0	1	0	1	lncRNA	chrX	134949549-134953382	+	ENSG00000236091.1
XLOC_017968	XLOC_017968	LINC02244	26932.6	chr15:99394322-99417208	TKS4_WT	TKS4_WT_T	0	27.0326		0.1	27.0326	8.07856	0	1	0	1	lncRNA	chr15	99395179-99396593	-	ENSG00000259590.1
XLOC_029922	XLOC_029922	LINC02245	-99.6799	chr2:64901839-64932447	TKS4_WT	TKS4_WT_T	31.2442	0		31.2442	0.1	-8.28744	0	1	0	1	lncRNA	chr2	64901840-65056226	-	ENSG00000237638.3
XLOC_033093	XLOC_033093	LINC02246	195.483	chr21:14816837-14918668	TKS4_WT	TKS4_WT_T	1168.57	3452.92	1.56307	1168.57	3452.92	1.56307	1.08299	0.15625	0.80618	0.999503	lncRNA	chr21	14819699-14918552	-	ENSG00000281903.2
XLOC_017953	XLOC_017953	LINC02254	-8.93926	chr15:97234279-97521811	TKS4_WT	TKS4_WT_T	31.2442	28.4512	-0.135099	31.2442	28.4512	-0.135099	0	1	0	1	lncRNA	chr15	97339693-97523442	-	ENSG00000259664.3
XLOC_016841	XLOC_016841	LINC02255	-99.6799	chr15:74379081-74394756	TKS4_WT	TKS4_WT_T	31.2442	0		31.2442	0.1	-8.28744	0	1	0	1	lncRNA	chr15	74379083-74390535	+	ENSG00000277718.1
XLOC_016461	XLOC_016461	LINC02256	-23.231	chr15:32536758-32580609	TKS4_WT	TKS4_WT_T	177.913	136.582	-0.381407	177.913	136.582	-0.381405	-0.171247	0.825	0.0835461	0.999503	lncRNA	chr15	32536047-32587613	+	ENSG00000261064.1
XLOC_017703	XLOC_017703	LINC02259	104.266	chr15:72605177-72636955	TKS4_WT	TKS4_WT_T	26.468	54.0652	1.03045	26.468	54.0652	1.03045	0	1	0	1	lncRNA	chr15	72608481-72636962	-	ENSG00000259783.6
XLOC_038112	XLOC_038112	LINC02265	159.561	chr4:40307184-40330419	TKS4_WT	TKS4_WT_T	31.2442	81.0978	1.37608	31.2442	81.0978	1.37607	0	1	0	1	lncRNA	chr4	40316485-40330419	+	ENSG00000249241.1
XLOC_039920	XLOC_039920	LINC02266	139319	chr4:145335262-145340419	TKS4_WT	TKS4_WT_T	0	139.419		0.1	139.419	10.4452		0.03325	1.47821	0.999503	lncRNA	chr4	145335263-145343559	-	ENSG00000272727.2
XLOC_040093	XLOC_040093	LINC02268	80997.8	chr4:174094659-174220398	TKS4_WT	TKS4_WT_T	0	81.0978		0.1	81.0978	9.66352	0	1	0	1	lncRNA	chr4	174061732-174220398	-	ENSG00000248174.7
XLOC_040002	XLOC_040002	LINC02272	28351.2	chr4:156623024-156642501	TKS4_WT	TKS4_WT_T	0	28.4512		0.1	28.4512	8.15235	0	1	0	1	lncRNA	chr4	156634494-156642454	-	ENSG00000251283.1
XLOC_038786	XLOC_038786	LINC02273	44.0502	chr4:152100752-152104720	TKS4_WT	TKS4_WT_T	315.029	453.8	0.526573	315.029	453.8	0.526572	0.30371	0.6556	0.183361	0.999503	lncRNA	chr4	152090459-152110157	+	ENSG00000245954.9
XLOC_040068	XLOC_040068	LINC02275	56802.4	chr4:169912558-169975902	TKS4_WT	TKS4_WT_T	0	56.9024		0.1	56.9024	9.15235	0	1	0	1	lncRNA	chr4	169917761-169975930	-	ENSG00000248319.3
XLOC_015296	XLOC_015296	LINC02277	56802.4	chr14:44387679-44481886	TKS4_WT	TKS4_WT_T	0	56.9024		0.1	56.9024	9.15235	0	1	0	1	lncRNA	chr14	44444747-44480626	-	ENSG00000258487.2
XLOC_015792	XLOC_015792	LINC02280	-29.5806	chr14:104661119-104665558	TKS4_WT	TKS4_WT_T	240.401	169.289	-0.50596	240.401	169.289	-0.505955	-0.23758	0.7547	0.122226	0.999503	lncRNA	chr14	104661120-104665558	-	ENSG00000260792.1
XLOC_015198	XLOC_015198	LINC02281	26932.6	chr14:28772703-28830166	TKS4_WT	TKS4_WT_T	0	27.0326		0.1	27.0326	8.07856	0	1	0	1	lncRNA	chr14	28800084-28830204	-	ENSG00000257748.2
XLOC_014935	XLOC_014935	LINC02285	28351.2	chr14:101120855-101123545	TKS4_WT	TKS4_WT_T	0	28.4512		0.1	28.4512	8.15235	0	1	0	1	lncRNA	chr14	101120840-101123545	+	ENSG00000259004.2
XLOC_015586	XLOC_015586	LINC02289	26932.6	chr14:77041048-77076191	TKS4_WT	TKS4_WT_T	0	27.0326		0.1	27.0326	8.07856	0	1	0	1	lncRNA	chr14	77069169-77076392	-	ENSG00000258819.2
XLOC_014558	XLOC_014558	LINC02290	-99.84	chr14:66106575-66128773	TKS4_WT	TKS4_WT_T	62.4884	0		62.4884	0.1	-9.28744	0	1	0	1	lncRNA	chr14	66111557-66131716	+	ENSG00000258502.6
XLOC_015001	XLOC_015001	LINC02298	-15.4767	chr14:105094146-105099496	TKS4_WT	TKS4_WT_T	235.625	199.158	-0.242577	235.625	199.158	-0.242579	-0.154335	0.8733	0.0588365	0.999503	lncRNA	chr14	105092739-105100131	+	ENSG00000257556.3
XLOC_015299	XLOC_015299	LINC02302	28351.2	chr14:44763156-44799126	TKS4_WT	TKS4_WT_T	0	28.4512		0.1	28.4512	8.15235	0	1	0	1	lncRNA	chr14	44763153-44782829	-	ENSG00000258998.2
XLOC_014806	XLOC_014806	LINC02304	-99.6799	chr14:97154856-97158736	TKS4_WT	TKS4_WT_T	31.2442	0		31.2442	0.1	-8.28744	0	1	0	1	lncRNA	chr14	97154857-97158736	+	ENSG00000259110.1
XLOC_014305	XLOC_014305	LINC02313	-99.6222	chr14:31944852-31950294	TKS4_WT	TKS4_WT_T	26.468	0		26.468	0.1	-8.04811	0	1	0	1	lncRNA	chr14	31944853-31950382	+	ENSG00000258474.1
XLOC_014787	XLOC_014787	LINC02318	28351.2	chr14:95573561-95581956	TKS4_WT	TKS4_WT_T	0	28.4512		0.1	28.4512	8.15235	0	1	0	1	lncRNA	chr14	95573520-95582305	+	ENSG00000258390.2
XLOC_015759	XLOC_015759	LINC02320	-99.96	chr14:101632320-101732525	TKS4_WT	TKS4_WT_T	249.953	0		249.953	0.1	-11.2874	0	1	0	1	lncRNA	chr14	101634454-101731108	-	ENSG00000258404.1
XLOC_015661	XLOC_015661	LINC02321	-55.8705	chr14:90819439-90828175	TKS4_WT	TKS4_WT_T	435.23	192.065	-1.18018	435.23	192.065	-1.18018	-1.05701	0.4681	0.329661	0.999503	lncRNA	chr14	90820064-90828202	-	ENSG00000258884.3
XLOC_014954	XLOC_014954	LINC02323	31.0256	chr14:102545253-102555826	TKS4_WT	TKS4_WT_T	1336.54	1751.21	0.389852	1336.54	1751.21	0.389849	0.267586	0.67015	0.173828	0.999503	lncRNA	chr14	102545254-102555826	+	ENSG00000259230.1
XLOC_015363	XLOC_015363	LINC02331	4.2876	chr14:53350169-53850864	TKS4_WT	TKS4_WT_T	23598.3	24610.1	0.0605674	23598.3	24610.1	0.0605676	0.0505064	0.95525	0.019883	0.999503	lncRNA	chr14	53685139-53850882	-	ENSG00000235269.2
XLOC_013487	XLOC_013487	LINC02340	19.0062	chr13:27172258-27220649	TKS4_WT	TKS4_WT_T	1711.86	2037.22	0.251031	1711.86	2037.22	0.251037	0.190269	0.79185	0.101357	0.999503	lncRNA	chr13	27178263-27251288	-	ENSG00000275294.4
XLOC_016447	XLOC_016447	LINC02352	-99.8933	chr15:31216020-31230862	TKS4_WT	TKS4_WT_T	93.7326	0		93.7326	0.1	-9.87241	0	1	0	1	lncRNA	chr15	31215622-31224445	+	ENSG00000259448.3
XLOC_010502	XLOC_010502	LINC02354	-8.93926	chr12:47831378-47840108	TKS4_WT	TKS4_WT_T	31.2442	28.4512	-0.135099	31.2442	28.4512	-0.135099	0	1	0	1	lncRNA	chr12	47826854-47837898	+	ENSG00000257488.5
XLOC_012574	XLOC_012574	LINC02361	10.7255	chr12:132178585-132194965	TKS4_WT	TKS4_WT_T	1120.41	1240.58	0.146988	1120.41	1240.58	0.146988	0.101039	0.89105	0.0500979	0.999503	lncRNA	chr12	132186735-132189728	-	ENSG00000256576.3
XLOC_040153	XLOC_040153	LINC02365	-99.6222	chr4:184584092-184624872	TKS4_WT	TKS4_WT_T	26.468	0		26.468	0.1	-8.04811	0	1	0	1	lncRNA	chr4	184584093-184625030	-	ENSG00000254233.1
XLOC_010260	XLOC_010260	LINC02367	-7.00452	chr12:9367463-9408752	TKS4_WT	TKS4_WT_T	151.445	140.837	-0.104762	151.445	140.837	-0.104768	-0.034791	0.84015	0.0756432	0.999503	lncRNA	chr12	9347056-9400387	+	ENSG00000260423.2
XLOC_010143	XLOC_010143	LINC02371,LOC100422463	-99.6799	chr12:2740074-2889524	TKS4_WT	TKS4_WT_T	31.2442	0		31.2442	0.1	-8.28744	0	1	0	1	lncRNA,-
XLOC_010814	XLOC_010814	LINC02373	-66.2021	chr12:69449652-69462764	TKS4_WT	TKS4_WT_T	84.1803	28.4512	-1.56499	84.1803	28.4512	-1.56499	-0.880536	0.52615	0.27889	0.999503	lncRNA	chr12	69449470-69460724	+	ENSG00000257507.1
XLOC_010634	XLOC_010634	LINC02381	-13.4796	chr12:54058253-54188985	TKS4_WT	TKS4_WT_T	31.2442	27.0326	-0.208887	31.2442	27.0326	-0.208888	0	1	0	1	lncRNA	chr12	54126053-54147485	+	ENSG00000250742.5
XLOC_011050	XLOC_011050	LINC02385	-99.6222	chr12:104169971-104177590	TKS4_WT	TKS4_WT_T	26.468	0		26.468	0.1	-8.04811	0	1	0	1	lncRNA	chr12	104170395-104177659	+	ENSG00000257193.1
XLOC_012002	XLOC_012002	LINC02388	28351.2	chr12:58565958-58812669	TKS4_WT	TKS4_WT_T	0	28.4512		0.1	28.4512	8.15235	0	1	0	1	lncRNA	chr12	58565959-58781747	-	ENSG00000257259.3
XLOC_010765	XLOC_010765	LINC02389	-45.2671	chr12:64883773-64992291	TKS4_WT	TKS4_WT_T	257.317	140.837	-0.869516	257.317	140.837	-0.86952	-0.390645	0.59185	0.227788	0.999503	lncRNA	chr12	64883394-64990646	+	ENSG00000255693.3
XLOC_010266	XLOC_010266	LINC02390	-99.92	chr12:9703618-9711454	TKS4_WT	TKS4_WT_T	124.977	0		124.977	0.1	-10.2874	0	1	0	1	lncRNA	chr12	9704077-9709350	+	ENSG00000256582.1
XLOC_012525	XLOC_012525	LINC02405	15.8804	chr12:126915226-127146493	TKS4_WT	TKS4_WT_T	697.323	808.061	0.212638	697.323	808.061	0.212637	0.0650392	0.8952	0.0480799	0.999503	lncRNA	chr12	126915199-127060565	-	ENSG00000249345.8
XLOC_010788	XLOC_010788	LINC02408	26932.6	chr12:67520081-67567131	TKS4_WT	TKS4_WT_T	0	27.0326		0.1	27.0326	8.07856	0	1	0	1	lncRNA	chr12	67443105-67590771	+	ENSG00000203585.4
XLOC_010152	XLOC_010152	LINC02417	7.49282	chr12:3368107-3371601	TKS4_WT	TKS4_WT_T	26.468	28.4512	0.104237	26.468	28.4512	0.10424	0	1	0	1	lncRNA	chr12	3367833-3371346	+	ENSG00000257048.1
XLOC_040151	XLOC_040151	LINC02427	250286	chr4:184506459-184537583	TKS4_WT	TKS4_WT_T	0	250.386		0.1	250.386	11.2899		0.0162	1.79048	0.999503	lncRNA	chr4	184503271-184537626	-	ENSG00000271538.7
XLOC_038996	XLOC_038996	LINC02434	168.732	chr4:188159003-188161142	TKS4_WT	TKS4_WT_T	52.9361	142.256	1.42617	52.9361	142.256	1.42617	0	1	0	1	lncRNA	chr4	188159705-188161157	+	ENSG00000248370.2
XLOC_038645	XLOC_038645	LINC02435	28351.2	chr4:123521447-123527824	TKS4_WT	TKS4_WT_T	0	28.4512		0.1	28.4512	8.15235	0	1	0	1	lncRNA	chr4	123505279-123527525	+	ENSG00000251526.1
XLOC_039201	XLOC_039201	LINC02438	-77.4077	chr4:19218808-19456870	TKS4_WT	TKS4_WT_T	478.614	108.13	-2.14609	478.614	108.13	-2.1461	-1.97379	0.06995	1.15521	0.999503	lncRNA	chr4	19172335-19456994	-	ENSG00000248238.2
XLOC_011401	XLOC_011401	LINC02443	-99.84	chr12:5122363-5379083	TKS4_WT	TKS4_WT_T	62.4884	0		62.4884	0.1	-9.28744	0	1	0	1	lncRNA	chr12	5226196-5244199	-	ENSG00000256115.6
XLOC_010280	XLOC_010280	LINC02446	7.49262	chr12:10553378-10575688	TKS4_WT	TKS4_WT_T	52.9361	56.9024	0.104237	52.9361	56.9024	0.104238	0	1	0	1	lncRNA	chr12	10553362-10572688	+	ENSG00000256039.3
XLOC_039115	XLOC_039115	LINC02447	168.642	chr4:7070547-7103376	TKS4_WT	TKS4_WT_T	31.2442	83.935	1.42568	31.2442	83.935	1.42568	0.593754	0.415	0.381952	0.999503	lncRNA	chr4	7093776-7103394	-	ENSG00000245468.5
XLOC_010238	XLOC_010238	LINC02449	-37.2709	chr12:8227733-8242946	TKS4_WT	TKS4_WT_T	841.404	527.805	-0.672793	841.404	527.805	-0.672794	-0.305955	0.80485	0.0942851	0.999503	lncRNA	chr12	8235415-8242564	+	ENSG00000215241.4
XLOC_010476	XLOC_010476	LINC02450	26932.6	chr12:42692215-42717119	TKS4_WT	TKS4_WT_T	0	27.0326		0.1	27.0326	8.07856	0	1	0	1	lncRNA	chr12	42687195-42717120	+	ENSG00000257114.3
XLOC_012246	XLOC_012246	LINC02453	-4.05007	chr12:98485543-98503855	TKS4_WT	TKS4_WT_T	88.9564	85.3536	-0.0596471	88.9564	85.3536	-0.0596464	-0.0322443	0.6894	0.161529	0.999503	lncRNA	chr12	98485544-98503858	-	ENSG00000245017.3
XLOC_010774	XLOC_010774	LINC02454	60.6932	chr12:65278592-65642372	TKS4_WT	TKS4_WT_T	966.78	1553.55	0.684306	966.78	1553.55	0.684309	0.141173	0.74595	0.12729	0.999503	lncRNA	chr12	65589111-65614169	+	ENSG00000256268.3
XLOC_011035	XLOC_011035	LINC02456	-61.7211	chr12:102279573-102481839	TKS4_WT	TKS4_WT_T	2512.47	961.746	-1.38538	2512.47	961.746	-1.38538	-1.00621	0.22285	0.651987	0.999503	lncRNA	chr12	102304355-102463491	+	ENSG00000283052.1
XLOC_011162	XLOC_011162	LINC02457	-11.2093	chr12:116515906-116519198	TKS4_WT	TKS4_WT_T	124.977	110.968	-0.171521	124.977	110.968	-0.171519	-0.0989847	0.4478	0.348916	0.999503	lncRNA	chr12	116482073-116521047	+	ENSG00000258018.2
XLOC_012175	XLOC_012175	LINC02458	776.555	chr12:89011125-89019692	TKS4_WT	TKS4_WT_T	62.4884	547.745	3.13184	62.4884	547.745	3.13184	2.81134	0.082	1.08619	0.999503	lncRNA	chr12	89010681-89309566	-	ENSG00000246363.4
XLOC_012392	XLOC_012392	LINC02463	715.006	chr12:115808374-115886270	TKS4_WT	TKS4_WT_T	31.2442	254.642	3.02681	31.2442	254.642	3.02681	2.14909	0.0564	1.24872	0.999503	lncRNA	chr12	115810359-115886137	-	ENSG00000257683.1
XLOC_038021	XLOC_038021	LINC02473	28351.2	chr4:24659855-24671574	TKS4_WT	TKS4_WT_T	0	28.4512		0.1	28.4512	8.15235	0	1	0	1	lncRNA	chr4	24659856-24671568	+	ENSG00000261121.2
XLOC_030703	XLOC_030703	LINC02478	-99.6799	chr2:160257718-160271895	TKS4_WT	TKS4_WT_T	31.2442	0		31.2442	0.1	-8.28744	0	1	0	1	lncRNA	chr2	160257716-160271880	-	ENSG00000285373.3
XLOC_039110	XLOC_039110	LINC02481	163.372	chr4:6687447-6690519	TKS4_WT	TKS4_WT_T	52.9361	139.419	1.3971	52.9361	139.419	1.3971	0.837155	0.31285	0.504664	0.999503	lncRNA	chr4	6687448-6690544	-	ENSG00000246526.3
XLOC_039109	XLOC_039109	LINC02482	-21.2783	chr4:6670727-6673881	TKS4_WT	TKS4_WT_T	798.818	628.843	-0.345167	798.818	628.843	-0.345167	-0.20825	0.79995	0.0969372	0.999503	lncRNA	chr4	6648695-6673965	-	ENSG00000251580.3
XLOC_045868	XLOC_045868	LINC02487	193384	chr6:167679625-167683787	TKS4_WT	TKS4_WT_T	0	193.484		0.1	193.484	10.918		0.0241	1.61798	0.999503	lncRNA	chr6	167679626-167696290	-	ENSG00000203688.6
XLOC_038057	XLOC_038057	LINC02501	28351.2	chr4:31506543-31558821	TKS4_WT	TKS4_WT_T	0	28.4512		0.1	28.4512	8.15235	0	1	0	1	lncRNA	chr4	31506422-31558831	+	ENSG00000249882.2
XLOC_038756	XLOC_038756	LINC02507	-99.936	chr4:147567762-147594984	TKS4_WT	TKS4_WT_T	156.221	0		156.221	0.1	-10.6094	0	1	0	1	lncRNA	chr4	147567606-147594589	+	ENSG00000251688.2
XLOC_039862	XLOC_039862	LINC02511	53965.2	chr4:136795901-137212799	TKS4_WT	TKS4_WT_T	0	54.0652		0.1	54.0652	9.07856	0	1	0	1	lncRNA	chr4	136795919-137212799	-	ENSG00000248869.7
XLOC_039820	XLOC_039820	LINC02516	-99.6799	chr4:124499941-124558434	TKS4_WT	TKS4_WT_T	31.2442	0		31.2442	0.1	-8.28744	0	1	0	1	lncRNA	chr4	124499940-124558445	-	ENSG00000261083.3
XLOC_045890	XLOC_045890	LINC02519	-83.7528	chr6:169355734-169391611	TKS4_WT	TKS4_WT_T	341.497	55.4838	-2.62174	341.497	55.4838	-2.62173	-1.33232	0.242	0.616185	0.999503	lncRNA	chr6	169369998-169388385	-	ENSG00000226194.5
XLOC_042982	XLOC_042982	LINC02521	135063	chr6:2621912-2640559	TKS4_WT	TKS4_WT_T	0	135.163		0.1	135.163	10.4005	0	1	0	1	lncRNA	chr6	2617144-2640001	+	ENSG00000228718.2
XLOC_044540	XLOC_044540	LINC02522	-60.6894	chr6:10465998-10481946	TKS4_WT	TKS4_WT_T	351.05	138	-1.347	351.05	138	-1.34701	-0.623889	0.39005	0.40888	0.999503	lncRNA	chr6	10474500-10478502	-	ENSG00000231056.1
XLOC_044117	XLOC_044117	LINC02523	26932.6	chr6:125645661-125762243	TKS4_WT	TKS4_WT_T	0	27.0326		0.1	27.0326	8.07856	0	1	0	1	lncRNA	chr6	125674353-125720218	+	ENSG00000224506.3
XLOC_044486	XLOC_044486	LINC02525	90.3056	chr6:3182816-3195767	TKS4_WT	TKS4_WT_T	88.9564	169.289	0.928314	88.9564	169.289	0.928318	0.378305	0.6178	0.209152	0.999503	lncRNA	chr6	3182626-3195784	-	ENSG00000230269.7
XLOC_045330	XLOC_045330	LINC02535	123.397	chr6:85387218-85404802	TKS4_WT	TKS4_WT_T	1330.37	2972.01	1.15961	1330.37	2972.01	1.15961	0.834137	0.24065	0.618614	0.999503	lncRNA	chr6	85387219-85390186	-	ENSG00000234155.1
XLOC_045867	XLOC_045867	LINC02538	28351.2	chr6:167666839-167679223	TKS4_WT	TKS4_WT_T	0	28.4512		0.1	28.4512	8.15235	0	1	0	1	lncRNA	chr6	167666840-167679270	-	ENSG00000272549.1
XLOC_045312	XLOC_045312	LINC02542	469.194	chr6:81843780-82116127	TKS4_WT	TKS4_WT_T	62.4884	355.68	2.50892	62.4884	355.68	2.50892	2.11964	0.25315	0.596622	0.999503	lncRNA	chr6	81844602-82169391	-	ENSG00000226453.3
XLOC_007332	XLOC_007332	LINC02547	55383.8	chr11:12030874-12061785	TKS4_WT	TKS4_WT_T	0	55.4838		0.1	55.4838	9.11592		0.0781	1.10735	0.999503	lncRNA	chr11	12030875-12061785	+	ENSG00000254486.1
XLOC_006081	XLOC_006081	LINC02561	28351.2	chr10:5265988-5271236	TKS4_WT	TKS4_WT_T	0	28.4512		0.1	28.4512	8.15235	0	1	0	1	lncRNA	chr10	5266033-5271236	-	ENSG00000224034.1
XLOC_039497	XLOC_039497	LINC02562	82.8318	chr4:75081924-75084708	TKS4_WT	TKS4_WT_T	372.741	681.489	0.870516	372.741	681.489	0.870517	0.472566	0.5085	0.293709	0.999503	lncRNA	chr4	75081702-75084717	-	ENSG00000260265.1
XLOC_016745	XLOC_016745	LINC02568	-13.4796	chr15:63390229-63437536	TKS4_WT	TKS4_WT_T	31.2442	27.0326	-0.208887	31.2442	27.0326	-0.208888	0	1	0	1	lncRNA	chr15	63390136-63438320	+	ENSG00000259459.6
XLOC_043407	XLOC_043407	LINC02569	116.689	chr6:30516265-30519580	TKS4_WT	TKS4_WT_T	199.605	432.522	1.11563	199.605	432.522	1.11563	0.695474	0.47705	0.321436	0.999503	lncRNA	chr6	30516266-30519217	+	ENSG00000235781.1
XLOC_044864	XLOC_044864	LINC02570	26932.6	chr6:30839528-30848159	TKS4_WT	TKS4_WT_T	0	27.0326		0.1	27.0326	8.07856	0	1	0	1	lncRNA	chr6	30839526-30848159	-	ENSG00000237923.1
XLOC_032984	XLOC_032984	LINC02575	-67.3955	chr21:44485570-44491142	TKS4_WT	TKS4_WT_T	938.123	305.87	-1.61686	938.123	305.87	-1.61686	-1.02713	0.13895	0.857141	0.999503	lncRNA	chr21	44485486-44491141	+	ENSG00000228709.2
XLOC_048872	XLOC_048872	LINC02577	25.641	chr7:106775017-106795564	TKS4_WT	TKS4_WT_T	310.253	389.805	0.329308	310.253	389.805	0.329307	0.196095	0.67995	0.167523	0.999503	lncRNA	chr7	106774955-106838480	+	ENSG00000228742.11
XLOC_023658	XLOC_023658	LINC02582	293.883	chr18:73324940-73349889	TKS4_WT	TKS4_WT_T	62.4884	246.131	1.97776	62.4884	246.131	1.97777	1.27756	0.21145	0.674792	0.999503	lncRNA	chr18	73324941-73349879	+	ENSG00000261780.3
XLOC_002499	XLOC_002499	LINC02593	536.477	chr1:916817-919692	TKS4_WT	TKS4_WT_T	88.9564	566.187	2.67011	88.9564	566.187	2.67011	1.06593	0.0732	1.13549	0.999503	lncRNA	chr1	916865-921016	-	ENSG00000223764.2
XLOC_021152	XLOC_021152	LINC02594	-8.93926	chr17:43669587-43707480	TKS4_WT	TKS4_WT_T	31.2442	28.4512	-0.135099	31.2442	28.4512	-0.135099	0	1	0	1	lncRNA	chr17	43679341-43706709	+	ENSG00000267440.2
XLOC_056896	XLOC_056896	LINC02595	11.6612	chrX:45848073-45851490	TKS4_WT	TKS4_WT_T	319.805	357.098	0.159127	319.805	357.098	0.159128	0.0824936	0.9053	0.0432075	0.999503	lncRNA	chrX	45847042-45851541	-	ENSG00000231566.3
XLOC_011498	XLOC_011498	LINC02598	158.221	chr12:10356922-10361116	TKS4_WT	TKS4_WT_T	245.177	633.099	1.3686	245.177	633.099	1.36861	0.760298	0.2428	0.614751	0.999503	lncRNA	chr12	10358464-10361045	-	ENSG00000256155.1
XLOC_039075	XLOC_039075	LINC02600	4.51425	chr4:3758747-3765837	TKS4_WT	TKS4_WT_T	586.675	613.159	0.0637005	586.675	613.159	0.0636997	0.0429324	0.9553	0.0198602	0.999503	lncRNA	chr4	3758748-3763390	-	ENSG00000250986.1
XLOC_055798	XLOC_055798	LINC02601	28351.2	chrX:41275738-41364472	TKS4_WT	TKS4_WT_T	0	28.4512		0.1	28.4512	8.15235	0	1	0	1	lncRNA	chrX	41275739-41276778	+	ENSG00000223714.1
XLOC_054931	XLOC_054931	LINC02603	-54.0558	chr9:94166257-94303967	TKS4_WT	TKS4_WT_T	182.689	83.935	-1.12205	182.689	83.935	-1.12205	-0.121307	0.4911	0.30883	0.999503	lncRNA	chr9	94176492-94259545	-	ENSG00000230262.8
XLOC_048555	XLOC_048555	LINC02604	-93.0336	chr7:66904119-66906297	TKS4_WT	TKS4_WT_T	2430.08	169.289	-3.84345	2430.08	169.289	-3.84344	-2.07647	0.04075	1.38987	0.999503	lncRNA	chr7	66902857-66906297	+	ENSG00000273142.1
XLOC_002616	XLOC_002616	LINC02606	62.2489	chr1:9425093-9428996	TKS4_WT	TKS4_WT_T	252.541	409.745	0.698209	252.541	409.745	0.698209	0.366086	0.5637	0.248952	0.999503	lncRNA	chr1	9425094-9440564	-	ENSG00000284693.2
XLOC_004570	XLOC_004570	LINC02608	-92.1436	chr1:212213001-212285021	TKS4_WT	TKS4_WT_T	344.085	27.0326	-3.66999	344.085	27.0326	-3.66999	-191.109	0.4809	0.317945	0.999503	lncRNA	chr1	212180141-212285130	-	ENSG00000226251.7
XLOC_003430	XLOC_003430	LINC02609	-13.9132	chr1:90782983-90851650	TKS4_WT	TKS4_WT_T	1812.96	1560.72	-0.216137	1812.96	1560.72	-0.216135	-0.159009	0.8416	0.0748943	0.999503	lncRNA	chr1	90769086-90851669	-	ENSG00000233593.11
XLOC_031279	XLOC_031279	LINC02610	28351.2	chr2:238225112-238231677	TKS4_WT	TKS4_WT_T	0	28.4512		0.1	28.4512	8.15235	0	1	0	1	lncRNA	chr2	238224552-238231711	-	ENSG00000186235.12
XLOC_038663	XLOC_038663	LINC02615	-71.6062	chr4:128428015-128519398	TKS4_WT	TKS4_WT_T	1072.25	304.452	-1.81636	1072.25	304.452	-1.81635	-1.16185	0.10625	0.973671	0.999503	lncRNA	chr4	128292751-128519398	+	ENSG00000251432.8
XLOC_038073	XLOC_038073	LINC02616	32.942	chr4:37001778-37020706	TKS4_WT	TKS4_WT_T	1193.25	1586.33	0.410798	1193.25	1586.33	0.410797	0.287336	0.6666	0.176135	0.999503	lncRNA	chr4	37001772-37023499	+	ENSG00000261761.5
XLOC_011497	XLOC_011497	LINC02617	313.892	chr12:10332859-10338292	TKS4_WT	TKS4_WT_T	26.468	109.549	2.04925	26.468	109.549	2.04926	1.22019	0.3983	0.39979	0.999503	lncRNA	chr12	10332861-10338292	-	ENSG00000256288.1
XLOC_006492	XLOC_006492	LINC02625	159.799	chr10:61778668-61867900	TKS4_WT	TKS4_WT_T	158.808	412.582	1.37739	158.808	412.582	1.3774	0.94995	0.37055	0.431153	0.999503	lncRNA	chr10	61781745-61821246	-	ENSG00000233643.2
XLOC_006552	XLOC_006552	LINC02636	-99.8267	chr10:69993789-70019881	TKS4_WT	TKS4_WT_T	57.7122	0		57.7122	0.1	-9.17273	0	1	0	1	lncRNA	chr10	69994276-70019496	-	ENSG00000224222.2
XLOC_005946	XLOC_005946	LINC02641	17.824	chr10:123347922-123562213	TKS4_WT	TKS4_WT_T	16002	18854.2	0.236631	16002	18854.2	0.236634	0.216326	0.7992	0.0973445	0.999503	lncRNA	chr10	123356450-123537767	+	ENSG00000230131.6
XLOC_005993	XLOC_005993	LINC02646	-69.122	chr10:130207785-130424539	TKS4_WT	TKS4_WT_T	552.843	170.707	-1.69535	552.843	170.707	-1.69535	-1.43043	0.3959	0.402414	0.999503	lncRNA	chr10	130213488-130483193	+	ENSG00000236303.4
XLOC_005020	XLOC_005020	LINC02648	28351.2	chr10:6618715-6639781	TKS4_WT	TKS4_WT_T	0	28.4512		0.1	28.4512	8.15235	0	1	0	1	lncRNA	chr10	6618716-6625346	+	ENSG00000225948.2
XLOC_005016	XLOC_005016	LINC02649	47.9844	chr10:6326543-6335982	TKS4_WT	TKS4_WT_T	187.465	277.419	0.565444	187.465	277.419	0.565445	0.4624	0.6285	0.201695	0.999503	lncRNA	chr10	6271169-6353827	+	ENSG00000215244.4
XLOC_006266	XLOC_006266	LINC02652	-99.6222	chr10:28433007-28495813	TKS4_WT	TKS4_WT_T	26.468	0		26.468	0.1	-8.04811	0	1	0	1	lncRNA	chr10	28433008-28495813	-	ENSG00000237128.1
XLOC_005017	XLOC_005017	LINC02656	-79.0527	chr10:6350315-6353808	TKS4_WT	TKS4_WT_T	271.645	56.9024	-2.25516	271.645	56.9024	-2.25516	-1.57081	0.16325	0.787147	0.999503	lncRNA	chr10	6350316-6352762	+	ENSG00000212743.2
XLOC_005987	XLOC_005987	LINC02666	-98.1864	chr10:129780151-129819545	TKS4_WT	TKS4_WT_T	1490.57	27.0326	-5.78502	1490.57	27.0326	-5.78502	-5.87869	0.2408	0.618344	0.999503	lncRNA	chr10	129784983-129806971	+	ENSG00000283141.1
XLOC_005161	XLOC_005161	LINC02673	28351.2	chr10:27342215-27344917	TKS4_WT	TKS4_WT_T	0	28.4512		0.1	28.4512	8.15235	0	1	0	1	lncRNA	chr10	27343436-27344917	+	ENSG00000260151.1
XLOC_005163	XLOC_005163	LINC02680	133.992	chr10:27542834-27584001	TKS4_WT	TKS4_WT_T	639.611	1496.64	1.22646	639.611	1496.64	1.22646	0.815699	0.22985	0.638555	0.999503	lncRNA	chr10	27564430-27594588	+	ENSG00000285737.1
XLOC_007157	XLOC_007157	LINC02688	82.1215	chr11:1049879-1055764	TKS4_WT	TKS4_WT_T	31.2442	56.9024	0.864901	31.2442	56.9024	0.864901	0	1	0	1	lncRNA	chr11	1049880-1055749	+	ENSG00000254872.3
XLOC_007163	XLOC_007163	LINC02689	-8.93926	chr11:1350306-1365198	TKS4_WT	TKS4_WT_T	31.2442	28.4512	-0.135099	31.2442	28.4512	-0.135099	0	1	0	1	lncRNA	chr11	1350359-1364286	+	ENSG00000285985.1
XLOC_008991	XLOC_008991	LINC02690	-99.6799	chr11:45750822-45751716	TKS4_WT	TKS4_WT_T	31.2442	0		31.2442	0.1	-8.28744	0	1	0	1	lncRNA	chr11	45749454-45752279	-	ENSG00000255226.2
XLOC_021981	XLOC_021981	LINC02693	-10.8322	chr17:21528309-21551678	TKS4_WT	TKS4_WT_T	14203	12664.5	-0.165404	14203	12664.5	-0.165406	-0.16411	0.80385	0.094825	0.999503	lncRNA	chr17	21428263-21574517	-	ENSG00000212719.14
XLOC_009536	XLOC_009536	LINC02695	307189	chr11:86191477-86193693	TKS4_WT	TKS4_WT_T	0	307.289		0.1	307.289	11.5854		0.0105	1.97881	0.962467	lncRNA	chr11	86192787-86193482	-	ENSG00000254699.1
XLOC_008188	XLOC_008188	LINC02700	-26.6249	chr11:94543920-94876748	TKS4_WT	TKS4_WT_T	17884.4	13122.7	-0.446638	17884.4	13122.7	-0.446637	-0.187876	0.8127	0.0900697	0.999503	lncRNA	chr11	94638045-94652884	+	ENSG00000255666.7
XLOC_007945	XLOC_007945	LINC02701	-99.8876	chr11:68870404-68874548	TKS4_WT	TKS4_WT_T	88.9564	0		88.9564	0.1	-9.79695		0.05545	1.2561	0.999503	lncRNA	chr11	68870664-68874542	+	ENSG00000250508.1
XLOC_008981	XLOC_008981	LINC02704	-99.6222	chr11:44689358-44701359	TKS4_WT	TKS4_WT_T	26.468	0		26.468	0.1	-8.04811	0	1	0	1	lncRNA	chr11	44694863-44696301	-	ENSG00000255079.1
XLOC_008768	XLOC_008768	LINC02709	-28.6249	chr11:9754769-10294219	TKS4_WT	TKS4_WT_T	1118.22	798.131	-0.486512	1118.22	798.131	-0.486507	-0.0734294	0.79075	0.101961	0.999503	lncRNA	chr11	9754770-9759533	-	ENSG00000245522.2
XLOC_009696	XLOC_009696	LINC02715	-99.6222	chr11:109741619-109823864	TKS4_WT	TKS4_WT_T	26.468	0		26.468	0.1	-8.04811	0	1	0	1	lncRNA	chr11	109741625-109823893	-	ENSG00000254659.3
XLOC_007539	XLOC_007539	LINC02716	-99.9134	chr11:45771431-45772358	TKS4_WT	TKS4_WT_T	115.424	0		115.424	0.1	-10.1727		0.0397	1.40121	0.999503	lncRNA	chr11	45771416-45773295	+	ENSG00000205106.5
XLOC_007415	XLOC_007415	LINC02718	28351.2	chr11:23163561-23213332	TKS4_WT	TKS4_WT_T	0	28.4512		0.1	28.4512	8.15235	0	1	0	1	lncRNA	chr11	23154683-23203161	+	ENSG00000255418.6
XLOC_008938	XLOC_008938	LINC02721	26932.6	chr11:33814140-33822372	TKS4_WT	TKS4_WT_T	0	27.0326		0.1	27.0326	8.07856	0	1	0	1	lncRNA	chr11	33813873-33822378	-	ENSG00000255133.2
XLOC_009278	XLOC_009278	LINC02723	-99.8812	chr11:64394341-64396209	TKS4_WT	TKS4_WT_T	84.1803	0		84.1803	0.1	-9.71734		0.06495	1.18742	0.999503	lncRNA	chr11	64394342-64395831	-	ENSG00000231680.1
XLOC_007839	XLOC_007839	LINC02724	76.8245	chr11:64449056-64451657	TKS4_WT	TKS4_WT_T	187.465	331.484	0.822318	187.465	331.484	0.822318	0.690803	0.51955	0.284373	0.999503	lncRNA	chr11	64449074-64451657	+	ENSG00000181908.5
XLOC_008499	XLOC_008499	LINC02725	56802.4	chr11:128093912-128183671	TKS4_WT	TKS4_WT_T	0	56.9024		0.1	56.9024	9.15235	0	1	0	1	lncRNA	chr11	128095758-128183671	+	ENSG00000273415.3
XLOC_009505	XLOC_009505	LINC02728	-28.7776	chr11:78423981-78429836	TKS4_WT	TKS4_WT_T	860.907	613.159	-0.489597	860.907	613.159	-0.489596	-0.336003	0.64335	0.191553	0.999503	lncRNA	chr11	78423982-78429836	-	ENSG00000251323.3
XLOC_008280	XLOC_008280	LINC02732	156.454	chr11:110355113-110406908	TKS4_WT	TKS4_WT_T	302.89	776.773	1.3587	302.89	776.773	1.3587	0.77679	0.2781	0.555799	0.999503	lncRNA	chr11	110355130-110407613	+	ENSG00000254416.6
XLOC_009310	XLOC_009310	LINC02736	81.9607	chr11:65487240-65490907	TKS4_WT	TKS4_WT_T	351.05	638.773	0.863629	351.05	638.773	0.863627	0.555327	0.42585	0.370743	0.999503	lncRNA	chr11	65487241-65488714	-	ENSG00000279243.3
XLOC_009180	XLOC_009180	LINC02739,TRK-TTT3-4	12.7188	chr11:59537531-59565805	TKS4_WT	TKS4_WT_T	151.445	170.707	0.172732	151.445	170.707	0.172728	0.0840092	0.8864	0.0523703	0.999503	lncRNA,-
XLOC_007437	XLOC_007437	LINC02742	56802.4	chr11:28894431-29064303	TKS4_WT	TKS4_WT_T	0	56.9024		0.1	56.9024	9.15235	0	1	0	1	lncRNA	chr11	28702607-29064322	+	ENSG00000249867.6
XLOC_007206	XLOC_007206	LINC02749	-60.0127	chr11:4187151-4202653	TKS4_WT	TKS4_WT_T	676.03	270.326	-1.32239	676.03	270.326	-1.32239	-0.915908	0.36655	0.435867	0.999503	lncRNA	chr11	4179675-4202663	+	ENSG00000254480.2
XLOC_007328	XLOC_007328	LINC02752	55383.8	chr11:11118763-11231436	TKS4_WT	TKS4_WT_T	0	55.4838		0.1	55.4838	9.11592	0	1	0	1	lncRNA	chr11	11020883-11183611	+	ENSG00000254401.2
XLOC_009403	XLOC_009403	LINC02753	85253.6	chr11:69985906-70189530	TKS4_WT	TKS4_WT_T	0	85.3536		0.1	85.3536	9.73731	0	1	0	1	lncRNA	chr11	70056230-70065371	-	ENSG00000248844.6
XLOC_007436	XLOC_007436	LINC02758	-21.4568	chr11:28538560-28679641	TKS4_WT	TKS4_WT_T	249.953	196.321	-0.348444	249.953	196.321	-0.348442	-0.229401	0.8194	0.086504	0.999503	lncRNA	chr11	28679183-28683469	+	ENSG00000248990.1
XLOC_008309	XLOC_008309	LINC02762	-7.40527	chr11:112270748-112362534	TKS4_WT	TKS4_WT_T	1060.11	981.606	-0.111003	1060.11	981.606	-0.110998	-0.0564362	0.9399	0.0269184	0.999503	lncRNA	chr11	112270749-112362534	+	ENSG00000250303.5
XLOC_000187	XLOC_000187	LINC02766	-8.93926	chr1:12525255-12531132	TKS4_WT	TKS4_WT_T	93.7326	85.3536	-0.135099	93.7326	85.3536	-0.135099	0	1	0	1	lncRNA	chr1	12525738-12530462	+	ENSG00000229484.2
XLOC_002109	XLOC_002109	LINC02767	28351.2	chr1:207958990-207968142	TKS4_WT	TKS4_WT_T	0	28.4512		0.1	28.4512	8.15235	0	1	0	1	lncRNA	chr1	207959292-207969329	+	ENSG00000284237.1
XLOC_004824	XLOC_004824	LINC02768	-99.9511	chr1:235892283-235972768	TKS4_WT	TKS4_WT_T	204.381	0		204.381	0.1	-10.997		0.1968	0.705975	0.999503	lncRNA	chr1	235957879-235971825	-	ENSG00000229291.1
XLOC_004574	XLOC_004574	LINC02771	28351.2	chr1:212466815-212472903	TKS4_WT	TKS4_WT_T	0	28.4512		0.1	28.4512	8.15235	0	1	0	1	lncRNA	chr1	212466699-212472905	-	ENSG00000224535.2
XLOC_001603	XLOC_001603	LINC02772	-99.6222	chr1:157225405-157283617	TKS4_WT	TKS4_WT_T	26.468	0		26.468	0.1	-8.04811	0	1	0	1	lncRNA	chr1	157273760-157283968	+	ENSG00000271736.2
XLOC_004576	XLOC_004576	LINC02773	124.789	chr1:212632368-212665649	TKS4_WT	TKS4_WT_T	84.1803	189.228	1.16857	84.1803	189.228	1.16857	0.807653	0.704	0.152427	0.999503	lncRNA	chr1	212653305-212665638	-	ENSG00000237980.2
XLOC_003224	XLOC_003224	LINC02777	-1.97659	chr1:58785150-59088247	TKS4_WT	TKS4_WT_T	84.1803	82.5164	-0.0288015	84.1803	82.5164	-0.0288018	-0.00599252	0.9066	0.0425843	0.999503	lncRNA	chr1	58882868-58931897	-	ENSG00000232453.7
XLOC_000096	XLOC_000096	LINC02780	-32.5315	chr1:3972915-4011584	TKS4_WT	TKS4_WT_T	120.201	81.0978	-0.567709	120.201	81.0978	-0.567714	-0.263496	0.6577	0.181972	0.999503	lncRNA	chr1	3976133-4012704	+	ENSG00000284668.2
XLOC_002993	XLOC_002993	LINC02786	26932.6	chr1:38129475-38141542	TKS4_WT	TKS4_WT_T	0	27.0326		0.1	27.0326	8.07856	0	1	0	1	lncRNA	chr1	38129464-38140593	-	ENSG00000284623.1
XLOC_001012	XLOC_001012	LINC02788	28351.2	chr1:90782983-90851650	TKS4_WT	TKS4_WT_T	0	28.4512		0.1	28.4512	8.15235	0	1	0	1	lncRNA	chr1	90835660-90849472	+	ENSG00000285532.2
XLOC_003388	XLOC_003388	LINC02795	-52.3404	chr1:86265374-86315502	TKS4_WT	TKS4_WT_T	173.137	82.5164	-1.06916	173.137	82.5164	-1.06916	-0.474977	0.53575	0.271038	0.999503	lncRNA	chr1	86288704-86320711	-	ENSG00000285210.1
XLOC_001299	XLOC_001299	LINC02798	-47.5935	chr1:121184974-121463123	TKS4_WT	TKS4_WT_T	105.872	55.4838	-0.932185	105.872	55.4838	-0.932183	-0.112902	0.7346	0.133949	0.999503	lncRNA	chr1	121396754-121463508	+	ENSG00000227082.3
XLOC_003747	XLOC_003747	LINC02802	7.49282	chr1:144218356-144250297	TKS4_WT	TKS4_WT_T	26.468	28.4512	0.104237	26.468	28.4512	0.10424	0.0114769	0.83975	0.07585	0.999503	lncRNA	chr1	144227029-144250326	-	ENSG00000232527.8
XLOC_004275	XLOC_004275	LINC02803	-37.9397	chr1:175866079-175917906	TKS4_WT	TKS4_WT_T	1921.02	1192.19	-0.688256	1921.02	1192.19	-0.688258	-0.475977	0.51475	0.288404	0.999503	lncRNA	chr1	175904762-175921057	-	ENSG00000227740.2
XLOC_001389	XLOC_001389	LINC02804,TRR-CCT6-2	-16.1419	chr1:147993861-148028057	TKS4_WT	TKS4_WT_T	4346.33	3644.75	-0.253977	4346.33	3644.75	-0.253978	-0.181299	0.7892	0.102813	0.999503	lncRNA,-
XLOC_001398	XLOC_001398	LINC02806	152.275	chr1:148271882-148303157	TKS4_WT	TKS4_WT_T	495.131	1249.09	1.335	495.131	1249.09	1.335	0.776849	0.415	0.381952	0.999503	lncRNA	chr1	148295180-148297556	+	ENSG00000238107.1
XLOC_003142	XLOC_003142	LINC02808	-99.8741	chr1:50261095-50321162	TKS4_WT	TKS4_WT_T	79.4041	0		79.4041	0.1	-9.63307	0	1	0	1	lncRNA	chr1	50229662-50321192	-	ENSG00000284696.2
XLOC_004711	XLOC_004711	LINC02809	-37.5097	chr1:228073908-228076550	TKS4_WT	TKS4_WT_T	860.509	537.735	-0.678293	860.509	537.735	-0.678295	-0.346701	0.64225	0.192296	0.999503	lncRNA	chr1	228073909-228076550	-	ENSG00000276255.2
XLOC_003015	XLOC_003015	LINC02811	56802.4	chr1:39799306-39817675	TKS4_WT	TKS4_WT_T	0	56.9024		0.1	56.9024	9.15235	0	1	0	1	lncRNA	chr1	39801414-39817460	-	ENSG00000284678.1
XLOC_004746	XLOC_004746	LINC02814	-8.93926	chr1:229036651-229222143	TKS4_WT	TKS4_WT_T	31.2442	28.4512	-0.135099	31.2442	28.4512	-0.135099	0	1	0	1	lncRNA	chr1	229087114-229205428	-	ENSG00000236975.2
XLOC_001879	XLOC_001879	LINC02816	-27.9056	chr1:180906462-180909621	TKS4_WT	TKS4_WT_T	584.087	421.094	-0.472043	584.087	421.094	-0.472041	-0.227641	0.7476	0.126331	0.999503	lncRNA	chr1	180906651-180909166	+	ENSG00000225857.5
XLOC_004303	XLOC_004303	LINC02818	-99.973	chr1:179820138-179836180	TKS4_WT	TKS4_WT_T	370.154	0		370.154	0.1	-11.8539		0.0039	2.40894	0.579564	lncRNA	chr1	179829609-179836124	-	ENSG00000231966.1
XLOC_010823	XLOC_010823	LINC02821	56802.4	chr12:70179625-70201081	TKS4_WT	TKS4_WT_T	0	56.9024		0.1	56.9024	9.15235	0	1	0	1	lncRNA	chr12	70180338-70202004	+	ENSG00000257139.1
XLOC_010151	XLOC_010151	LINC02827	-90.9531	chr12:3298277-3366122	TKS4_WT	TKS4_WT_T	927.773	83.935	-3.46643	927.773	83.935	-3.46643	-1.09098	0.3084	0.510886	0.999503	lncRNA	chr12	3318718-3325343	+	ENSG00000236908.2
XLOC_029234	XLOC_029234	LINC02832	-15.8559	chr2:219730100-219737928	TKS4_WT	TKS4_WT_T	3354.27	2822.42	-0.249067	3354.27	2822.42	-0.249066	-0.19606	0.7639	0.116963	0.999503	lncRNA	chr2	219685381-219737937	+	ENSG00000227308.2
XLOC_023509	XLOC_023509	LINC02837	55383.8	chr18:49499319-49527494	TKS4_WT	TKS4_WT_T	0	55.4838		0.1	55.4838	9.11592		0.04715	1.32652	0.999503	lncRNA	chr18	49499390-49501860	+	ENSG00000264464.1
XLOC_051215	XLOC_051215	LINC02842	-99.8111	chr8:61785071-62100736	TKS4_WT	TKS4_WT_T	52.9361	0		52.9361	0.1	-9.04811	0	1	0	1	lncRNA	chr8	61785047-61944180	+	ENSG00000254119.5
XLOC_055351	XLOC_055351	LINC02846	18.3874	chr9:136107828-136109424	TKS4_WT	TKS4_WT_T	187.465	221.935	0.243516	187.465	221.935	0.243516	0.151347	0.87725	0.0568766	0.999503	lncRNA	chr9	136107808-136109424	-	ENSG00000260193.1
XLOC_016490	XLOC_016490	LINC02853	2.13314	chr15:36045841-36049529	TKS4_WT	TKS4_WT_T	26.468	27.0326	0.0304486	26.468	27.0326	0.0304511	0	1	0	1	lncRNA	chr15	35919892-36049537	+	ENSG00000259245.2
XLOC_023298	XLOC_023298	LINC02856	28351.2	chr18:9646109-9648590	TKS4_WT	TKS4_WT_T	0	28.4512		0.1	28.4512	8.15235	0	1	0	1	lncRNA	chr18	9646110-9648502	+	ENSG00000285594.1
XLOC_043866	XLOC_043866	LINC02857	-99.6222	chr6:84020886-84026106	TKS4_WT	TKS4_WT_T	26.468	0		26.468	0.1	-8.04811	0	1	0	1	lncRNA	chr6	84019204-84026100	+	ENSG00000230852.2
XLOC_018667	XLOC_018667	LINC02858	108030	chr16:19167833-19394476	TKS4_WT	TKS4_WT_T	0	108.13		0.1	108.13	10.0786	0	1	0	1	lncRNA	chr16	19334011-19337804	+	ENSG00000285869.1
XLOC_048203	XLOC_048203	LINC02860	-99.6799	chr7:26637870-26647272	TKS4_WT	TKS4_WT_T	31.2442	0		31.2442	0.1	-8.28744	0	1	0	1	lncRNA	chr7	26637871-26647305	+	ENSG00000222004.7
XLOC_019488	XLOC_019488	LINC02861	432.103	chr16:3947608-3950444	TKS4_WT	TKS4_WT_T	26.468	140.837	2.41171	26.468	140.837	2.41171	1.5603	0.35275	0.452533	0.999503	lncRNA	chr16	3930806-3950586	-	ENSG00000262185.3
XLOC_042367	XLOC_042367	LINC02863	59.7865	chr5:132410928-132476044	TKS4_WT	TKS4_WT_T	120.201	192.065	0.676153	120.201	192.065	0.676146	0.249664	0.58655	0.231695	0.999503	lncRNA	chr5	132419416-132426714	-	ENSG00000238160.1
XLOC_002181	XLOC_002181	LINC02869	53965.2	chr1:218510094-218525978	TKS4_WT	TKS4_WT_T	0	54.0652		0.1	54.0652	9.07856	0	1	0	1	lncRNA	chr1	218459265-218525978	+	ENSG00000228208.7
XLOC_006003	XLOC_006003	LINC02870	195.308	chr10:132445188-132448306	TKS4_WT	TKS4_WT_T	218.709	645.866	1.56222	218.709	645.866	1.56222	1.43528	0.21675	0.664041	0.999503	lncRNA	chr10	132444327-132449408	+	ENSG00000180066.10
XLOC_011852	XLOC_011852	LINC02874	523.805	chr12:52204822-52223880	TKS4_WT	TKS4_WT_T	31.2442	194.903	2.64109	31.2442	194.903	2.6411	1.20955	0.0407	1.39041	0.999503	lncRNA	chr12	52205392-52213583	-	ENSG00000257137.7
XLOC_021371	XLOC_021371	LINC02875	17.0394	chr17:61411750-61413280	TKS4_WT	TKS4_WT_T	213.933	250.386	0.226996	213.933	250.386	0.226995	0.105936	0.88195	0.054556	0.999503	lncRNA	chr17	61411751-61413280	+	ENSG00000187013.4
XLOC_051709	XLOC_051709	LINC02878	7.33994	chr8:143697114-143698413	TKS4_WT	TKS4_WT_T	685.183	735.475	0.102187	685.183	735.475	0.102187	0.0589018	0.9318	0.0306773	0.999503	lncRNA	chr8	143696154-143698413	+	ENSG00000181097.5
XLOC_044052	XLOC_044052	LINC02880	-99.6799	chr6:113904386-113921642	TKS4_WT	TKS4_WT_T	31.2442	0		31.2442	0.1	-8.28744	0	1	0	1	lncRNA	chr6	113904132-113921642	+	ENSG00000175967.4
XLOC_012102	XLOC_012102	LINC02882	-99.84	chr12:74133172-74294332	TKS4_WT	TKS4_WT_T	62.4884	0		62.4884	0.1	-9.28744	0	1	0	1	lncRNA	chr12	73820315-74402600	-	ENSG00000251138.7
XLOC_017864	XLOC_017864	LINC02883	173.182	chr15:85754940-85758725	TKS4_WT	TKS4_WT_T	31.2442	85.3536	1.44986	31.2442	85.3536	1.44986	0	1	0	1	lncRNA	chr15	85754941-85756237	-	ENSG00000259416.2
XLOC_003602	XLOC_003602	LINC02884	168.642	chr1:112229672-112360678	TKS4_WT	TKS4_WT_T	31.2442	83.935	1.42568	31.2442	83.935	1.42568	0.553134	0.40575	0.391741	0.999503	lncRNA	chr1	112176836-112360625	-	ENSG00000231246.3
XLOC_034230	XLOC_034230	LINC02885	173.182	chr22:34756664-34997916	TKS4_WT	TKS4_WT_T	31.2442	85.3536	1.44986	31.2442	85.3536	1.44986	0	1	0	1	lncRNA	chr22	34756676-35002862	-	ENSG00000286592.1
XLOC_054854	XLOC_054854	LINC02893	42.0444	chr9:87008450-87042126	TKS4_WT	TKS4_WT_T	276.422	392.642	0.506346	276.422	392.642	0.506342	0.218141	0.69615	0.157297	0.999503	lncRNA	chr9	87008440-87042419	-	ENSG00000269994.3
XLOC_052478	XLOC_052478	LINC02894	-34.5679	chr8:94637284-94639467	TKS4_WT	TKS4_WT_T	1226.29	802.387	-0.611924	1226.29	802.387	-0.61193	-0.429608	0.5696	0.24443	0.999503	lncRNA	chr8	94637285-94639467	-	ENSG00000261437.1
XLOC_041009	XLOC_041009	LINCADL	85253.6	chr5:115956570-115958601	TKS4_WT	TKS4_WT_T	0	85.3536		0.1	85.3536	9.73731	0	1	0	1	lncRNA	chr5	115956571-115958599	+	ENSG00000287148.1
XLOC_050341	XLOC_050341	LINC-PINT	-8.85864	chr7:130877561-131109925	TKS4_WT	TKS4_WT_T	39730.7	36211.1	-0.13382	39730.7	36211.1	-0.133822	-0.128614	0.856	0.0675262	0.999503	lncRNA	chr7	130938963-131110176	-	ENSG00000231721.7
XLOC_005021	XLOC_005021	LINP1	-59.7299	chr10:6737381-6738939	TKS4_WT	TKS4_WT_T	1794.65	722.708	-1.31222	1794.65	722.708	-1.31222	-0.931171	0.20085	0.697128	0.999503	lncRNA	chr10	6709530-6740532	+	ENSG00000223784.2
XLOC_025000	XLOC_025000	LIPE-AS1,LOC101930071	-51.9638	chr19:42397127-42652355	TKS4_WT	TKS4_WT_T	1661.52	798.131	-1.0578	1661.52	798.131	-1.05781	-0.35688	0.5279	0.277448	0.999503	lncRNA,-
XLOC_024135	XLOC_024135	LIVAR	22.8925	chr18:70335438-70352459	TKS4_WT	TKS4_WT_T	613.541	753.996	0.297397	613.541	753.996	0.297397	0.16318	0.8512	0.0699684	0.999503	lncRNA	chr18	70335929-70337310	-	ENSG00000266304.1
XLOC_040922	XLOC_040922	LIX1-AS1	136.711	chr5:97071467-97183247	TKS4_WT	TKS4_WT_T	209.157	495.098	1.24313	209.157	495.098	1.24313	0.11627	0.1166	0.933301	0.999503	lncRNA	chr5	97089075-97437217	+	ENSG00000251513.2
XLOC_001354	XLOC_001354	LIX1L-AS1	28351.2	chr1:145919012-145958038	TKS4_WT	TKS4_WT_T	0	28.4512		0.1	28.4512	8.15235	0	1	0	1	lncRNA	chr1	145926590-145959179	+	ENSG00000234222.6
XLOC_036222	XLOC_036222	LMCD1-AS1	13.0195	chr3:8221146-8501658	TKS4_WT	TKS4_WT_T	266.869	301.614	0.176572	266.869	301.614	0.176572	0.0606876	0.7852	0.10502	0.999503	lncRNA	chr3	7951263-8611924	-	ENSG00000227110.7
XLOC_018435	XLOC_018435	LMF1-AS1	28351.2	chr16:853633-981613	TKS4_WT	TKS4_WT_T	0	28.4512		0.1	28.4512	8.15235	0	1	0	1	lncRNA	chr16	921033-934495	+	ENSG00000260439.1
XLOC_037625	XLOC_037625	LMLN-AS1	-99.84	chr3:197960199-198043720	TKS4_WT	TKS4_WT_T	62.4884	0		62.4884	0.1	-9.28744	0	1	0	1	lncRNA	chr3	198038321-198039234	-	ENSG00000232832.1
XLOC_007140	XLOC_007140	LMNTD2-AS1	79.851	chr11:518966-560780	TKS4_WT	TKS4_WT_T	62.4884	112.386	0.846805	62.4884	112.386	0.846802	0	1	0	1	lncRNA	chr11	557595-560107	+	ENSG00000254815.6
XLOC_013140	XLOC_013140	LMO7DN	-46.2537	chr13:75871037-75883813	TKS4_WT	TKS4_WT_T	52.9361	28.4512	-0.895763	52.9361	28.4512	-0.895762	0	1	0	1	lncRNA	chr13	75871038-75883811	+	ENSG00000178734.5
XLOC_006460	XLOC_006460	LNCAROD	0.935263	chr10:52450876-52470533	TKS4_WT	TKS4_WT_T	1709.68	1725.67	0.0134361	1709.68	1725.67	0.0134303	0.0107939	0.9862	0.006035	0.999503	lncRNA	chr10	52450874-52755507	-	ENSG00000231131.9
XLOC_044607	XLOC_044607	LNC-LBCS	298.316	chr6:19729420-19804759	TKS4_WT	TKS4_WT_T	151.445	603.229	1.99391	151.445	603.229	1.99391	0.937367	0.0591	1.22841	0.999503	lncRNA	chr6	19323428-19839080	-	ENSG00000228412.9
XLOC_052778	XLOC_052778	LNCOC1	-18.9275	chr8:142700080-142726973	TKS4_WT	TKS4_WT_T	3499.15	2836.85	-0.302718	3499.15	2836.85	-0.302715	-0.228394	0.7352	0.133595	0.999503	lncRNA	chr8	142701857-142727047	-	ENSG00000253741.3
XLOC_010860	XLOC_010860	LNCOG	56802.4	chr12:76259882-76305969	TKS4_WT	TKS4_WT_T	0	56.9024		0.1	56.9024	9.15235	0	1	0	1	lncRNA	chr12	76259836-76305969	+	ENSG00000257219.6
XLOC_037197	XLOC_037197	LNCSRLR	116.301	chr3:146066343-146069185	TKS4_WT	TKS4_WT_T	62.4884	135.163	1.11304	62.4884	135.163	1.11304	0	1	0	1	lncRNA	chr3	146066344-146069185	-	ENSG00000240032.1
XLOC_000134	XLOC_000134	LNCTAM34A	-30.2953	chr1:9148010-9192086	TKS4_WT	TKS4_WT_T	310.253	216.261	-0.520673	310.253	216.261	-0.520672	-0.177028	0.83575	0.0779236	0.999503	lncRNA	chr1	9182004-9196284	+	ENSG00000234546.5
XLOC_017944	XLOC_017944	LOC105369212,NR2F2-AS1	-28.088	chr15:95990434-96340263	TKS4_WT	TKS4_WT_T	1740.92	1251.93	-0.475693	1740.92	1251.93	-0.475696	-0.0749243	0.61275	0.212717	0.999503	-,lncRNA
XLOC_011541	XLOC_011541	LOH12CR2	139.912	chr12:12355407-12357067	TKS4_WT	TKS4_WT_T	676.03	1621.88	1.26251	676.03	1621.88	1.26251	0.718722	0.32795	0.484192	0.999503	lncRNA	chr12	12355403-12357067	-	ENSG00000205791.4
XLOC_017716	XLOC_017716	LOXL1-AS1	-8.00986	chr15:73917467-73952137	TKS4_WT	TKS4_WT_T	5122.06	4711.79	-0.12045	5122.06	4711.79	-0.120449	-0.0826438	0.9148	0.0386738	0.999503	lncRNA	chr15	73908071-73928248	-	ENSG00000261801.7
XLOC_037514	XLOC_037514	LPP-AS2	-30.2615	chr3:188151205-188890671	TKS4_WT	TKS4_WT_T	1829.88	1276.13	-0.519973	1829.88	1276.13	-0.519974	-0.0647677	0.7577	0.120503	0.999503	lncRNA	chr3	188151206-188154057	-	ENSG00000270959.1
XLOC_003614	XLOC_003614	LRIG2-DT	168.642	chr1:113011686-113073102	TKS4_WT	TKS4_WT_T	31.2442	83.935	1.42568	31.2442	83.935	1.42568	0.821969	0.2562	0.591421	0.999503	lncRNA	chr1	113011687-113073113	-	ENSG00000238198.2
XLOC_007555	XLOC_007555	LRP4-AS1	-34.5884	chr11:46846410-46918550	TKS4_WT	TKS4_WT_T	709.064	463.81	-0.612382	709.064	463.81	-0.612382	-0.125153	0.8266	0.0827046	0.999503	lncRNA	chr11	46846410-46874421	+	ENSG00000247675.8
XLOC_035084	XLOC_035084	LRRC2-AS1	83835	chr3:46515384-46582457	TKS4_WT	TKS4_WT_T	0	83.935		0.1	83.935	9.71313		0.17005	0.769423	0.999503	lncRNA	chr3	46557398-46559694	+	ENSG00000268324.2
XLOC_033362	XLOC_033362	LRRC3-DT	-99.9168	chr21:44450985-44455284	TKS4_WT	TKS4_WT_T	120.201	0		120.201	0.1	-10.2312		0.0351	1.45469	0.999503	lncRNA	chr21	44450986-44455284	-	ENSG00000229356.1
XLOC_003419	XLOC_003419	LRRC8C-DT	-99.6799	chr1:89615809-89719533	TKS4_WT	TKS4_WT_T	31.2442	0		31.2442	0.1	-8.28744	0	1	0	1	lncRNA	chr1	89581291-89633003	-	ENSG00000231999.8
XLOC_040361	XLOC_040361	LSINCT5	26932.6	chr5:2707929-2751677	TKS4_WT	TKS4_WT_T	0	27.0326		0.1	27.0326	8.07856	0	1	0	1	lncRNA	chr5	2712591-2715237	+	ENSG00000281560.1
XLOC_001330	XLOC_001330	LSP1P5	-31.9113	chr1:144623177-145112696	TKS4_WT	TKS4_WT_T	79.4041	54.0652	-0.554514	79.4041	54.0652	-0.554513	-0.0468242	0.80915	0.091971	0.999503	lncRNA	chr1	144716062-144758298	+	ENSG00000288905.1
XLOC_049655	XLOC_049655	LUARIS	124.789	chr7:43112579-43566001	TKS4_WT	TKS4_WT_T	84.1803	189.228	1.16857	84.1803	189.228	1.16857	0.202092	0.68495	0.164341	0.999503	lncRNA	chr7	43508728-43522542	-	ENSG00000231638.1
XLOC_042141	XLOC_042141	LUCAT1	11.898	chr5:91302985-91314402	TKS4_WT	TKS4_WT_T	199.605	223.354	0.162185	199.605	223.354	0.162184	0.0758312	0.92935	0.0318207	0.999503	lncRNA	chr5	91054834-91314547	-	ENSG00000248323.8
XLOC_017096	XLOC_017096	LUNAR1	-99.6222	chr15:99014703-99031050	TKS4_WT	TKS4_WT_T	26.468	0		26.468	0.1	-8.04811	0	1	0	1	lncRNA	chr15	99014526-99031054	+	ENSG00000278090.3
XLOC_054358	XLOC_054358	LURAP1L-AS1	-26.6417	chr9:12693374-12823060	TKS4_WT	TKS4_WT_T	190.052	139.419	-0.446973	190.052	139.419	-0.446967	-0.0860103	0.84085	0.0752815	0.999503	lncRNA	chr9	12698554-12814377	-	ENSG00000235448.3
XLOC_052785	XLOC_052785	LY6E-DT	26932.6	chr8:142982030-143018390	TKS4_WT	TKS4_WT_T	0	27.0326		0.1	27.0326	8.07856	0	1	0	1	lncRNA	chr8	142981738-143018437	-	ENSG00000247317.4
XLOC_004606	XLOC_004606	LYPLAL1-DT	13.237	chr1:219080972-219173788	TKS4_WT	TKS4_WT_T	168.361	190.647	0.179348	168.361	190.647	0.179346	0.0815044	0.90835	0.0417468	0.999503	lncRNA	chr1	218976672-219173961	-	ENSG00000228063.3
XLOC_006298	XLOC_006298	MACORIS	53965.2	chr10:31693081-31707824	TKS4_WT	TKS4_WT_T	0	54.0652		0.1	54.0652	9.07856	0	1	0	1	lncRNA	chr10	31693084-31707447	-	ENSG00000237797.2
XLOC_051702	XLOC_051702	MAFA-AS1	-73.9826	chr8:143417678-143419150	TKS4_WT	TKS4_WT_T	218.709	56.9024	-1.94245	218.709	56.9024	-1.94245	-137.81	0.17515	0.75659	0.999503	lncRNA	chr8	143417679-143419150	+	ENSG00000254338.1
XLOC_021622	XLOC_021622	MAFG-DT	9.5881	chr17:81927828-81930753	TKS4_WT	TKS4_WT_T	6154.71	6744.83	0.13209	6154.71	6744.83	0.132091	0.117349	0.8733	0.0588365	0.999503	lncRNA	chr17	81927829-81930753	+	ENSG00000265688.2
XLOC_056594	XLOC_056594	MAGEA6-DT	61.4679	chrX:152769786-152792170	TKS4_WT	TKS4_WT_T	2013.36	3250.93	0.691244	2013.36	3250.93	0.691247	0.498879	0.4986	0.302248	0.999503	lncRNA	chrX	152769764-152792268	+	ENSG00000286051.1
XLOC_057634	XLOC_057634	MAGEA8-AS1	-99.84	chrX:149825707-149897006	TKS4_WT	TKS4_WT_T	62.4884	0		62.4884	0.1	-9.28744	0	1	0	1	lncRNA	chrX	149878836-149881070	-	ENSG00000230899.1
XLOC_035262	XLOC_035262	MAGI1-AS1	56802.4	chr3:65353525-66038918	TKS4_WT	TKS4_WT_T	0	56.9024		0.1	56.9024	9.15235	0	1	0	1	lncRNA	chr3	65893816-65925297	+	ENSG00000240175.1
XLOC_036704	XLOC_036704	MAGI1-IT1	-0.250611	chr3:65353525-66038918	TKS4_WT	TKS4_WT_T	5346.94	5333.54	-0.00362012	5346.94	5333.54	-0.00362009	-0.000991078	0.9853	0.00643152	0.999503	lncRNA	chr3	65872815-65954558	-	ENSG00000272610.1
XLOC_051483	XLOC_051483	MAILR	164.425	chr8:102864270-102977876	TKS4_WT	TKS4_WT_T	199.605	527.805	1.40286	199.605	527.805	1.40286	0.704141	0.25885	0.586952	0.999503	lncRNA	chr8	102864271-103002424	+	ENSG00000253320.7
XLOC_052642	XLOC_052642	MAL2-AS1	-99.6222	chr8:119208362-119246857	TKS4_WT	TKS4_WT_T	26.468	0		26.468	0.1	-8.04811	0	1	0	1	lncRNA	chr8	119214625-119246848	-	ENSG00000253972.6
XLOC_007862	XLOC_007862	MALAT1	-31.5125	chr11:65497737-65507432	TKS4_WT	TKS4_WT_T	7336210	5024390	-0.546085	7336210	5024390	-0.546086	-0.230425	0.81605	0.0882832	0.999503	lncRNA	chr11	65497688-65506516	+	ENSG00000251562.9
XLOC_042461	XLOC_042461	MALINC1	142.288	chr5:140102921-140108012	TKS4_WT	TKS4_WT_T	699.91	1695.8	1.27673	699.91	1695.8	1.27672	0.976971	0.1986	0.702021	0.999503	lncRNA	chr5	140071312-140109274	-	ENSG00000245146.7
XLOC_024078	XLOC_024078	MALT1-AS1	64.1242	chr18:58670008-58754477	TKS4_WT	TKS4_WT_T	1477.04	2424.18	0.714795	1477.04	2424.18	0.714788	0.0714435	0.67895	0.168162	0.999503	lncRNA	chr18	58670009-58671877	-	ENSG00000267226.2
XLOC_054749	XLOC_054749	MAMDC2-AS1	-99.6799	chr9:70043580-70258874	TKS4_WT	TKS4_WT_T	31.2442	0		31.2442	0.1	-8.28744	0	1	0	1	lncRNA	chr9	70033921-70175888	-	ENSG00000204706.14
XLOC_055388	XLOC_055388	MAN1B1-DT	193.119	chr9:137084945-137086817	TKS4_WT	TKS4_WT_T	1421.11	4165.54	1.55148	1421.11	4165.54	1.55149	1.18284	0.1127	0.948076	0.999503	lncRNA	chr9	137084946-137086817	-	ENSG00000268996.3
XLOC_006075	XLOC_006075	MANCR	-37.6281	chr10:4650184-4689309	TKS4_WT	TKS4_WT_T	88.9564	55.4838	-0.681032	88.9564	55.4838	-0.681032	-0.182476	0.70715	0.150488	0.999503	lncRNA	chr10	4650158-4678185	-	ENSG00000231298.7
XLOC_045389	XLOC_045389	MANEA-DT	-26.515	chr6:95560095-95577451	TKS4_WT	TKS4_WT_T	377.518	277.419	-0.444477	377.518	277.419	-0.444479	-0.259569	0.7422	0.129479	0.999503	lncRNA	chr6	95575183-95577450	-	ENSG00000261366.1
XLOC_021186	XLOC_021186	MAP3K14-AS1	-33.7884	chr17:45247924-45317048	TKS4_WT	TKS4_WT_T	887.375	587.545	-0.594845	887.375	587.545	-0.594845	-0.127735	0.7091	0.149293	0.999503	lncRNA	chr17	45247916-45269824	+	ENSG00000267278.6
XLOC_030787	XLOC_030787	MAP3K20-AS1	106.052	chr2:173075434-173282036	TKS4_WT	TKS4_WT_T	79.4041	163.614	1.04301	79.4041	163.614	1.04301	0.0804294	0.62675	0.202906	0.999503	lncRNA	chr2	173166446-173282036	-	ENSG00000238133.6
XLOC_028576	XLOC_028576	MAP3K2-DT	2.56048	chr2:127298667-127406167	TKS4_WT	TKS4_WT_T	1176.34	1206.46	0.0364781	1176.34	1206.46	0.036475	0.00464622	0.98085	0.0083974	0.999503	lncRNA	chr2	127388178-127406228	+	ENSG00000236682.3
XLOC_027894	XLOC_027894	MAP4K3-DT	90.1672	chr2:39437415-39601344	TKS4_WT	TKS4_WT_T	1805.99	3434.4	0.927264	1805.99	3434.4	0.927268	0.763977	0.23475	0.629394	0.999503	lncRNA	chr2	39436530-39665343	+	ENSG00000231312.8
XLOC_017495	XLOC_017495	MAPK6-DT	-68.0167	chr15:51983275-52019095	TKS4_WT	TKS4_WT_T	88.9564	28.4512	-1.64461	88.9564	28.4512	-1.64461	-0.889044	0.3469	0.459796	0.999503	lncRNA	chr15	52010999-52019095	-	ENSG00000259438.1
XLOC_012359	XLOC_012359	MAPKAPK5-AS1	-27.5884	chr12:111839766-112013219	TKS4_WT	TKS4_WT_T	17179.3	12439.8	-0.465712	17179.3	12439.8	-0.465708	-0.233629	0.6338	0.198048	0.999503	lncRNA	chr12	111839758-111842902	-	ENSG00000234608.9
XLOC_021194	XLOC_021194	MAPT-IT1	3.54991	chr17:45843355-46225374	TKS4_WT	TKS4_WT_T	1093.55	1132.37	0.0503351	1093.55	1132.37	0.0503262	0.00645432	0.9487	0.0228711	0.999503	lncRNA	chr17	45895783-45898798	+	ENSG00000279685.2
XLOC_021387	XLOC_021387	MARCHF10-DT	26932.6	chr17:62808501-62836371	TKS4_WT	TKS4_WT_T	0	27.0326		0.1	27.0326	8.07856	0	1	0	1	lncRNA	chr17	62808500-62836371	+	ENSG00000265000.1
XLOC_041951	XLOC_041951	MAST4-AS1	-99.6222	chr5:66596353-67169595	TKS4_WT	TKS4_WT_T	26.468	0		26.468	0.1	-8.04811	0	1	0	1	lncRNA	chr5	67001383-67004080	-	ENSG00000229666.2
XLOC_000444	XLOC_000444	MATN1-AS1	50.3516	chr1:30711276-30726746	TKS4_WT	TKS4_WT_T	1399.42	2104.05	0.588337	1399.42	2104.05	0.58834	0.41542	0.56015	0.251696	0.999503	lncRNA	chr1	30718504-30726827	+	ENSG00000186056.10
XLOC_041172	XLOC_041172	MATR3,SNHG4	-10.1203	chr5:139273751-139331677	TKS4_WT	TKS4_WT_T	401429	360803	-0.153931	401429	360803	-0.153934	-0.147746	0.82905	0.0814193	0.999503	protein_coding,lncRNA
XLOC_037259	XLOC_037259	MBNL1-AS1	46.422	chr3:152243631-152465780	TKS4_WT	TKS4_WT_T	2364.01	3461.43	0.550132	2364.01	3461.43	0.550132	0.0418931	0.74445	0.128164	0.999503	lncRNA	chr3	152245262-152269565	-	ENSG00000229619.5
XLOC_014049	XLOC_014049	MCF2L-AS1	-78.8826	chr13:112894377-113099742	TKS4_WT	TKS4_WT_T	269.457	56.9024	-2.24349	269.457	56.9024	-2.24349	-0.412167	0.5778	0.238222	0.999503	lncRNA	chr13	112967484-112968824	-	ENSG00000235280.2
XLOC_033017	XLOC_033017	MCM3AP-AS1	60.1202	chr21:46229230-46324046	TKS4_WT	TKS4_WT_T	1457.13	2333.16	0.679149	1457.13	2333.16	0.679156	0.0924907	0.5564	0.254613	0.999503	lncRNA	chr21	46229196-46259390	+	ENSG00000215424.10
XLOC_051777	XLOC_051777	MCPH1-AS1	84.7807	chr8:6406614-6708209	TKS4_WT	TKS4_WT_T	252.541	466.647	0.885815	252.541	466.647	0.885814	0.0640497	0.6229	0.205582	0.999503	lncRNA	chr8	6617310-6708224	-	ENSG00000249898.9
XLOC_043415	XLOC_043415	MDC1-AS1	26.0888	chr6:30699806-30717988	TKS4_WT	TKS4_WT_T	293.337	369.865	0.33444	293.337	369.865	0.33444	0.0334843	0.8525	0.0693056	0.999503	lncRNA	chr6	30703067-30713184	+	ENSG00000224328.1
XLOC_055792	XLOC_055792	MED14OS	-99.6222	chrX:40648304-40738698	TKS4_WT	TKS4_WT_T	26.468	0		26.468	0.1	-8.04811	0	1	0	1	lncRNA	chrX	40735400-40738701	+	ENSG00000234636.2
XLOC_040874	XLOC_040874	MEF2C-AS1	21.4145	chr5:88538265-89467581	TKS4_WT	TKS4_WT_T	93.7326	113.805	0.279939	93.7326	113.805	0.279941	0	1	0	1	lncRNA	chr5	88883328-89466398	+	ENSG00000248309.8
XLOC_036167	XLOC_036167	MELTF-AS1	109.797	chr3:197001739-197029817	TKS4_WT	TKS4_WT_T	1026.68	2153.94	1.06899	1026.68	2153.94	1.06899	0.282524	0.6891	0.161718	0.999503	lncRNA	chr3	196999460-197004744	+	ENSG00000228109.2
XLOC_050331	XLOC_050331	MESTIT1	-41.6692	chr7:130486174-130687432	TKS4_WT	TKS4_WT_T	334.134	194.903	-0.777673	334.134	194.903	-0.77767	-0.0482027	0.71985	0.142758	0.999503	lncRNA	chr7	130486042-130491033	-	ENSG00000272701.3
XLOC_031179	XLOC_031179	MFF-DT	62.4374	chr2:227164588-227325164	TKS4_WT	TKS4_WT_T	283.785	460.973	0.699883	283.785	460.973	0.699884	0.18595	0.80635	0.0934764	0.999503	lncRNA	chr2	227221052-227325711	-	ENSG00000236432.8
XLOC_022684	XLOC_022684	MGC16275	-8.35556	chr17:74203677-74213321	TKS4_WT	TKS4_WT_T	341.497	312.963	-0.125881	341.497	312.963	-0.125881	-0.00312299	0.93005	0.0314937	0.999503	lncRNA	chr17	74209980-74213342	-	ENSG00000246731.3
XLOC_031973	XLOC_031973	MHENCR	169.978	chr20:63627234-63628824	TKS4_WT	TKS4_WT_T	646.576	1745.61	1.43284	646.576	1745.61	1.43284	0.848277	0.2289	0.640354	0.999503	lncRNA	chr20	63627179-63628824	+	ENSG00000232442.2
XLOC_033631	XLOC_033631	MIAT,MIATNB	-47.0478	chr22:26657481-26780893	TKS4_WT	TKS4_WT_T	2331.97	1234.83	-0.917238	2331.97	1234.83	-0.917237	-0.642334	0.4802	0.318578	0.999503	lncRNA,lncRNA
XLOC_044884	XLOC_044884	MICB-DT	49.5422	chr6:31479917-31494794	TKS4_WT	TKS4_WT_T	351.05	524.968	0.580555	351.05	524.968	0.580553	0.366936	0.6069	0.216883	0.999503	lncRNA	chr6	31479973-31494935	-	ENSG00000286940.1
XLOC_056849	XLOC_056849	MID1IP1-AS1	83835	chrX:38801247-38806532	TKS4_WT	TKS4_WT_T	0	83.935		0.1	83.935	9.71313		0.1094	0.960983	0.999503	lncRNA	chrX	38801568-38803883	-	ENSG00000238123.1
XLOC_021517	XLOC_021517	MIF4GD-DT	72.9309	chr17:75271298-75289958	TKS4_WT	TKS4_WT_T	3107.31	5373.5	0.790196	3107.31	5373.5	0.790196	0.26498	0.77135	0.112749	0.999503	lncRNA	chr17	75271369-75273895	+	ENSG00000263843.1
XLOC_034101	XLOC_034101	MIF-AS1	3.79564	chr22:23786965-24005474	TKS4_WT	TKS4_WT_T	5233.11	5431.74	0.053746	5233.11	5431.74	0.0537458	0.00496294	0.97635	0.0103945	0.999503	lncRNA	chr22	23894426-23898930	-	ENSG00000218537.1
XLOC_052790	XLOC_052790	MINCR	72.0149	chr8:143280154-143281700	TKS4_WT	TKS4_WT_T	4261.95	7331.19	0.782534	4261.95	7331.19	0.782534	0.671675	0.3851	0.414426	0.999503	lncRNA	chr8	143280158-143281692	-	ENSG00000253716.7
XLOC_049424	XLOC_049424	MIOS-DT	-21.1133	chr7:7550103-7566065	TKS4_WT	TKS4_WT_T	173.137	136.582	-0.342148	173.137	136.582	-0.342147	-0.150426	0.8314	0.08019	0.999503	lncRNA	chr7	7552462-7566996	-	ENSG00000272894.5
XLOC_009828	XLOC_009828	MIR100HG	-14.3016	chr11:122028328-122422871	TKS4_WT	TKS4_WT_T	86540.1	74163.5	-0.22266	86540.1	74163.5	-0.222659	-0.239319	0.74755	0.12636	0.999503	lncRNA	chr11	122028325-122556721	-	ENSG00000255248.10
XLOC_049150	XLOC_049150	MIR11400,MTRNR2L6,PGBD4P1,PRSS1,PRSS2,PRSS3P1,TRBC1,TRBC2,TRBD1,TRBD2,TRBJ1-1,TRBJ1-2,TRBJ1-3,TRBJ1-4,TRBJ1-5,TRBJ1-6,TRBJ2-1,TRBJ2-2,TRBJ2-2P,TRBJ2-3,TRBJ2-4,TRBJ2-5,TRBJ2-6,TRBJ2-7,TRBV1,TRBV10-1,TRBV10-2,TRBV10-3,TRBV11-1,TRBV11-2,TRBV11-3,TRBV12-1,TRBV12-2,TRBV12-3,TRBV12-4,TRBV12-5,TRBV13,TRBV14,TRBV15,TRBV16,TRBV17,TRBV18,TRBV19,TRBV2,TRBV20-1,TRBV21-1,TRBV22-1,TRBV23-1,TRBV24-1,TRBV25-1,TR…	353.178	chr7:142299010-142813287	TKS4_WT	TKS4_WT_T	488.166	2212.26	2.18008	488.166	2212.26	2.18008	1.44375	0.0378	1.42251	0.999503	-,protein_coding,processed_pseudogene,protein_coding,protein_coding,unprocessed_pseudogene,TR_C_gene,TR_C_gene,TR_D_gene,-,TR_J_gene,TR_J_gene,TR_J_gene,TR_J_gene,TR_J_gene,TR_J_gene,TR_J_gene,TR_J_gene,TR_J_gene,TR_J_gene,TR_J_gene,TR_J_gene,TR_J_gene,TR_J_gene,TR_V_pseudogene,TR_V_gene,TR_V_gene,TR_V_gene,TR_V_gene,lncRNA,TR_V_gene,TR_V_pseudogene,TR_V_pseudogene,TR_V_gene,TR_V_gene,TR_V_gene,T…
XLOC_051851	XLOC_051851	MIR124-1HG	-99.84	chr8:9900063-9903329	TKS4_WT	TKS4_WT_T	62.4884	0		62.4884	0.1	-9.28744	0	1	0	1	lncRNA	chr8	9899871-9919155	-	ENSG00000253230.10
XLOC_013221	XLOC_013221	MIR17,MIR17HG,MIR18A,MIR19A,MIR19B1,MIR20A,MIR92A1	25.256	chr13:91347819-91354575	TKS4_WT	TKS4_WT_T	29271.1	36663.8	0.32488	29271.1	36663.8	0.324879	0.326398	0.63605	0.196509	0.999503	miRNA,lncRNA,miRNA,miRNA,miRNA,miRNA,miRNA
XLOC_004404	XLOC_004404	MIR181A1HG	10.9324	chr1:198808002-198937429	TKS4_WT	TKS4_WT_T	173.137	192.065	0.149686	173.137	192.065	0.149681	0.067328	0.9203	0.0360706	0.999503	lncRNA	chr1	198777861-198937471	-	ENSG00000229989.5
XLOC_054060	XLOC_054060	MIR181A2HG	193384	chr9:124517274-124771311	TKS4_WT	TKS4_WT_T	0	193.484		0.1	193.484	10.918		0.15425	0.811775	0.999503	lncRNA	chr9	124658412-124698631	+	ENSG00000224020.2
XLOC_006211	XLOC_006211	MIR1915HG	13.074	chr10:21492657-21497260	TKS4_WT	TKS4_WT_T	6865.97	7763.63	0.17727	6865.97	7763.63	0.177268	0.15277	0.8302	0.0808173	0.999503	lncRNA	chr10	21492658-21497260	-	ENSG00000204682.8
XLOC_009288	XLOC_009288	MIR192,MIR194-2,MIR194-2HG	-53.2793	chr11:64888457-64893449	TKS4_WT	TKS4_WT_T	182.689	85.3536	-1.09787	182.689	85.3536	-1.09787	-0.657372	0.576	0.239578	0.999503	miRNA,miRNA,lncRNA
XLOC_018617	XLOC_018617	MIR193BHG	-70.1426	chr16:14301380-14331062	TKS4_WT	TKS4_WT_T	2687.4	802.387	-1.74384	2687.4	802.387	-1.74384	-1.17246	0.0684	1.16494	0.999503	lncRNA	chr16	14301389-14331067	+	ENSG00000262454.4
XLOC_010210	XLOC_010210	MIR200CHG	98.5045	chr12:6963244-6964447	TKS4_WT	TKS4_WT_T	384.881	764.006	0.989171	384.881	764.006	0.989172	0.533029	0.4345	0.36201	0.999503	lncRNA	chr12	6963246-6964447	+	ENSG00000257084.1
XLOC_007063	XLOC_007063	MIR202,MIR202HG	-99.6799	chr10:133246478-133247885	TKS4_WT	TKS4_WT_T	31.2442	0		31.2442	0.1	-8.28744	0	1	0	1	miRNA,lncRNA
XLOC_051307	XLOC_051307	MIR2052HG	52.7576	chr8:74590139-74758352	TKS4_WT	TKS4_WT_T	235.625	359.935	0.611245	235.625	359.935	0.611244	0.291475	0.6915	0.160208	0.999503	lncRNA	chr8	74599775-74823313	+	ENSG00000254349.6
XLOC_008565	XLOC_008565	MIR210HG	-22.9087	chr11:565656-568457	TKS4_WT	TKS4_WT_T	730.756	563.349	-0.375359	730.756	563.349	-0.375361	-0.182997	0.81215	0.0903638	0.999503	lncRNA	chr11	565657-568457	-	ENSG00000247095.4
XLOC_021675	XLOC_021675	MIR22,MIR22HG	-32.1338	chr17:1711503-1716272	TKS4_WT	TKS4_WT_T	13762.2	9339.88	-0.559234	13762.2	9339.88	-0.559235	-0.545468	0.4451	0.351542	0.999503	miRNA,lncRNA
XLOC_056895	XLOC_056895	MIR221,MIR222,MIR222HG	2.45775	chrX:45745213-45770267	TKS4_WT	TKS4_WT_T	267562	274138	0.0350323	267562	274138	0.0350291	0.0354446	0.9618	0.0169152	0.999503	miRNA,miRNA,lncRNA
XLOC_025774	XLOC_025774	MIR23AHG,MIR24-2,MIR27A	5.58996	chr19:13834515-13842918	TKS4_WT	TKS4_WT_T	77988.1	82347.6	0.078473	77988.1	82347.6	0.0784726	0.0708411	0.9165	0.0378675	0.999503	lncRNA,miRNA,miRNA
XLOC_004529	XLOC_004529	MIR29B2,MIR29B2CHG,MIR29C	-37.3057	chr1:207801517-207822703	TKS4_WT	TKS4_WT_T	1207.18	756.833	-0.673594	1207.18	756.833	-0.673594	-0.487461	0.4865	0.312917	0.999503	miRNA,lncRNA,miRNA
XLOC_039737	XLOC_039737	MIR302B,MIR302CHG	135063	chr4:112637142-112657592	TKS4_WT	TKS4_WT_T	0	135.163		0.1	135.163	10.4005		0.2076	0.682773	0.999503	miRNA,lncRNA
XLOC_052481	XLOC_052481	MIR3150B,MIR3150BHG	214.438	chr8:94823286-95118496	TKS4_WT	TKS4_WT_T	52.9361	166.451	1.65278	52.9361	166.451	1.65277	0.0769516	0.49205	0.307991	0.999503	miRNA,lncRNA
XLOC_054430	XLOC_054430	MIR31HG	46.4519	chr9:21454267-21559798	TKS4_WT	TKS4_WT_T	6011.23	8803.56	0.550428	6011.23	8803.56	0.550427	0.434036	0.53705	0.269985	0.999503	lncRNA	chr9	21453802-21559900	-	ENSG00000171889.6
XLOC_002615	XLOC_002615	MIR34A,MIR34AHG	112.783	chr1:9148010-9192086	TKS4_WT	TKS4_WT_T	4291.6	9131.81	1.08939	4291.6	9131.81	1.08939	0.91763	0.21505	0.667461	0.999503	miRNA,lncRNA
XLOC_000538	XLOC_000538	MIR3659HG	-76.2113	chr1:38047133-38119530	TKS4_WT	TKS4_WT_T	466.474	110.968	-2.07166	466.474	110.968	-2.07165	-1.00966	0.1916	0.717604	0.999503	lncRNA	chr1	38047314-38119025	+	ENSG00000224592.5
XLOC_052468	XLOC_052468	MIR378D2HG	41.5957	chr8:93915733-93916644	TKS4_WT	TKS4_WT_T	11890.9	16837	0.501773	11890.9	16837	0.501777	0.500982	0.4599	0.337337	0.999503	lncRNA	chr8	93915734-93916682	-	ENSG00000264448.5
XLOC_042365	XLOC_042365	MIR3936HG	-68.8338	chr5:132294383-132395614	TKS4_WT	TKS4_WT_T	360.602	112.386	-1.68194	360.602	112.386	-1.68195	-0.188514	0.49005	0.30976	0.999503	lncRNA	chr5	132311285-132370170	-	ENSG00000233006.8
XLOC_040158	XLOC_040158	MIR3945HG	80997.8	chr4:184826606-184855652	TKS4_WT	TKS4_WT_T	0	81.0978		0.1	81.0978	9.66352	0	1	0	1	lncRNA	chr4	184844554-184855751	-	ENSG00000251230.6
XLOC_057517	XLOC_057517	MIR424,MIR503HG	319.253	chrX:134543376-134546711	TKS4_WT	TKS4_WT_T	26.468	110.968	2.06781	26.468	110.968	2.06782	1.19997	0.42615	0.370438	0.999503	miRNA,lncRNA
XLOC_030375	XLOC_030375	MIR4435-2HG	22.7667	chr2:111195865-111510994	TKS4_WT	TKS4_WT_T	42664.9	52378.3	0.29592	42664.9	52378.3	0.29592	0.294723	0.6833	0.165389	0.999503	lncRNA	chr2	111006015-111523376	-	ENSG00000172965.17
XLOC_038788	XLOC_038788	MIR4453HG	-10.783	chr4:152320543-152539263	TKS4_WT	TKS4_WT_T	4642.05	4141.5	-0.164609	4642.05	4141.5	-0.164609	-0.0529184	0.92005	0.0361886	0.999503	lncRNA	chr4	152536264-152539263	+	ENSG00000268471.6
XLOC_023495	XLOC_023495	MIR4527HG	-99.6222	chr18:47285723-47594550	TKS4_WT	TKS4_WT_T	26.468	0		26.468	0.1	-8.04811	0	1	0	1	lncRNA	chr18	47285725-47594550	+	ENSG00000267761.3
XLOC_016652	XLOC_016652	MIR4713HG	73.4453	chr15:51037487-51338596	TKS4_WT	TKS4_WT_T	209.157	362.773	0.794479	209.157	362.773	0.794481	0.268433	0.678	0.16877	0.999503	lncRNA	chr15	51037488-51293912	+	ENSG00000259240.1
XLOC_033880	XLOC_033880	MIR4763,MIRLET7A3,MIRLET7B,MIRLET7BHG	-70.1657	chr22:46085996-46113928	TKS4_WT	TKS4_WT_T	8602.3	2566.44	-1.74495	8602.3	2566.44	-1.74495	-1.1685	0.1287	0.890421	0.999503	miRNA,miRNA,miRNA,lncRNA
XLOC_021769	XLOC_021769	MIR497HG	-99.6799	chr17:7012416-7019654	TKS4_WT	TKS4_WT_T	31.2442	0		31.2442	0.1	-8.28744	0	1	0	1	lncRNA	chr17	7015818-7019659	-	ENSG00000267532.5
XLOC_043127	XLOC_043127	MIR548A1HG	80997.8	chr6:18522746-18722898	TKS4_WT	TKS4_WT_T	0	81.0978		0.1	81.0978	9.66352	0	1	0	1	lncRNA	chr6	18522735-18674001	+	ENSG00000283408.2
XLOC_043053	XLOC_043053	MIR5689HG	56802.4	chr6:10426427-10456781	TKS4_WT	TKS4_WT_T	0	56.9024		0.1	56.9024	9.15235	0	1	0	1	lncRNA	chr6	10434316-10456781	+	ENSG00000229401.1
XLOC_040911	XLOC_040911	MIR583HG	-8.93926	chr5:95962000-96631085	TKS4_WT	TKS4_WT_T	31.2442	28.4512	-0.135099	31.2442	28.4512	-0.135099	0	1	0	1	lncRNA	chr5	96050115-96215519	+	ENSG00000250551.1
XLOC_055196	XLOC_055196	MIR600HG,STRBP	-27.6263	chr9:123109493-123268586	TKS4_WT	TKS4_WT_T	58292.3	42188.3	-0.466465	58292.3	42188.3	-0.466462	-0.471551	0.57245	0.242262	0.999503	lncRNA,protein_coding
XLOC_018812	XLOC_018812	MIR762HG	4.07763	chr16:30833625-30895220	TKS4_WT	TKS4_WT_T	1209.77	1259.1	0.0576672	1209.77	1259.1	0.0576601	0.0128209	0.97255	0.0120881	0.999503	lncRNA	chr16	30875222-30895220	+	ENSG00000260083.3
XLOC_004014	XLOC_004014	MIR9-1,MIR9-1HG	152.417	chr1:156404251-156429548	TKS4_WT	TKS4_WT_T	1500.92	3788.58	1.33581	1500.92	3788.58	1.33581	1.02593	0.0885	1.05306	0.999503	miRNA,lncRNA
XLOC_023958	XLOC_023958	MIR924HG	-9.06848	chr18:39206923-39751995	TKS4_WT	TKS4_WT_T	2314.06	2104.21	-0.137151	2314.06	2104.21	-0.137148	-0.0707664	0.91095	0.0405055	0.999503	lncRNA	chr18	39206917-39800322	-	ENSG00000267374.3
XLOC_053823	XLOC_053823	MIRLET7A1,MIRLET7A1HG	166.138	chr9:94166257-94303967	TKS4_WT	TKS4_WT_T	163.584	435.359	1.41217	163.584	435.359	1.41217	0.261282	0.4806	0.318216	0.999503	miRNA,lncRNA
XLOC_032840	XLOC_032840	MIS18A-AS1	158.013	chr21:32154681-32283954	TKS4_WT	TKS4_WT_T	52.9361	136.582	1.36744	52.9361	136.582	1.36744	0.136883	0.5743	0.240861	0.999503	lncRNA	chr21	32277863-32280988	+	ENSG00000227256.1
XLOC_050343	XLOC_050343	MKLN1-AS	-17.8603	chr7:131110093-131496637	TKS4_WT	TKS4_WT_T	1399.42	1149.48	-0.283855	1399.42	1149.48	-0.283848	-0.0283335	0.8823	0.0543837	0.999503	lncRNA	chr7	131309469-131328312	-	ENSG00000236753.7
XLOC_000671	XLOC_000671	MKNK1-AS1	-54.4696	chr1:46538695-46604311	TKS4_WT	TKS4_WT_T	62.4884	28.4512	-1.1351	62.4884	28.4512	-1.1351	0	1	0	1	lncRNA	chr1	46538611-46570255	+	ENSG00000269956.2
XLOC_005164	XLOC_005164	MKX-AS1	-99.9703	chr10:27672873-27767799	TKS4_WT	TKS4_WT_T	336.721	0		336.721	0.1	-11.7173		0.10615	0.97408	0.999503	lncRNA	chr10	27744786-27767794	+	ENSG00000230500.1
XLOC_028742	XLOC_028742	MMADHC-DT	-30.1248	chr2:149569636-149859191	TKS4_WT	TKS4_WT_T	79.4041	55.4838	-0.517148	79.4041	55.4838	-0.517147	-0.0122307	0.75475	0.122197	0.999503	lncRNA	chr2	149587196-150047447	+	ENSG00000231969.3
XLOC_019461	XLOC_019461	MMP25-AS1	-52.8014	chr16:3045962-3060729	TKS4_WT	TKS4_WT_T	1175.54	554.838	-1.08318	1175.54	554.838	-1.08319	-0.466383	0.53935	0.268129	0.999503	lncRNA	chr16	3037400-3059370	-	ENSG00000261971.9
XLOC_049325	XLOC_049325	MNX1-AS1	-22.0343	chr7:157010856-157016424	TKS4_WT	TKS4_WT_T	3999.86	3118.52	-0.359087	3999.86	3118.52	-0.359088	-0.306949	0.64565	0.190003	0.999503	lncRNA	chr7	157010805-157016426	+	ENSG00000243479.3
XLOC_033679	XLOC_033679	MORC2-AS1	-24.8539	chr22:30922307-30968774	TKS4_WT	TKS4_WT_T	151.445	113.805	-0.412231	151.445	113.805	-0.41223	-0.0393934	0.81	0.091515	0.999503	lncRNA	chr22	30922308-30932449	+	ENSG00000235989.4
XLOC_056255	XLOC_056255	MORF4L2-AS1	-22.695	chrX:103675497-103692560	TKS4_WT	TKS4_WT_T	572.346	442.452	-0.371368	572.346	442.452	-0.371367	-0.0170863	0.8305	0.0806604	0.999503	lncRNA	chrX	103687284-103691772	+	ENSG00000231154.1
XLOC_005168	XLOC_005168	MPP7-DT	-58.8179	chr10:28303135-28306271	TKS4_WT	TKS4_WT_T	269.457	110.968	-1.27991	269.457	110.968	-1.27991	-0.640629	0.65415	0.184323	0.999503	lncRNA	chr10	28303300-28307658	+	ENSG00000282996.1
XLOC_033224	XLOC_033224	MRAP-AS1	6.5335	chr21:32291812-32393012	TKS4_WT	TKS4_WT_T	552.843	588.963	0.0913082	552.843	588.963	0.0913072	0.00607464	0.9608	0.017367	0.999503	lncRNA	chr21	32306464-32308737	-	ENSG00000232623.1
XLOC_045503	XLOC_045503	MROCKI	28351.2	chr6:113868012-113873347	TKS4_WT	TKS4_WT_T	0	28.4512		0.1	28.4512	8.15235	0	1	0	1	lncRNA	chr6	113868013-113873390	-	ENSG00000227502.4
XLOC_000044	XLOC_000044	MRPL20-AS1	-10.9876	chr1:1399529-1407293	TKS4_WT	TKS4_WT_T	9498.64	8454.97	-0.16792	9498.64	8454.97	-0.167921	-0.0668325	0.84275	0.0743012	0.999503	lncRNA	chr1	1399515-1402046	+	ENSG00000224870.8
XLOC_000045	XLOC_000045	MRPL20-DT	69.5636	chr1:1408200-1410684	TKS4_WT	TKS4_WT_T	2346.7	3979.15	0.761828	2346.7	3979.15	0.761827	0.583915	0.4043	0.393296	0.999503	lncRNA	chr1	1409096-1410618	+	ENSG00000272455.1
XLOC_041838	XLOC_041838	MRPS30-DT	29.066	chr5:44744327-44808793	TKS4_WT	TKS4_WT_T	844.39	1089.82	0.368102	844.39	1089.82	0.368108	0.253464	0.7194	0.14303	0.999503	lncRNA	chr5	44742420-44808777	-	ENSG00000251141.6
XLOC_030315	XLOC_030315	MRPS9-AS2	4.81278	chr2:104936240-105102944	TKS4_WT	TKS4_WT_T	52.9361	55.4838	0.0678147	52.9361	55.4838	0.0678147	0.00372148	0.78145	0.107099	0.999503	lncRNA	chr2	104936239-105038496	-	ENSG00000224509.3
XLOC_033797	XLOC_033797	MRTFA-AS1	-54.4697	chr22:40346499-40636719	TKS4_WT	TKS4_WT_T	124.977	56.9024	-1.1351	124.977	56.9024	-1.1351	0	1	0	1	lncRNA	chr22	40521800-40526707	+	ENSG00000232564.3
XLOC_027951	XLOC_027951	MSH2-OT1	28351.2	chr2:47403066-47634501	TKS4_WT	TKS4_WT_T	0	28.4512		0.1	28.4512	8.15235	0	1	0	1	lncRNA	chr2	47527008-47535199	+	ENSG00000235760.4
XLOC_013506	XLOC_013506	MTUS2-AS1	-99.8741	chr13:28819962-29505947	TKS4_WT	TKS4_WT_T	79.4041	0		79.4041	0.1	-9.63307	0	1	0	1	lncRNA	chr13	29476515-29490105	-	ENSG00000179141.9
XLOC_050142	XLOC_050142	MUC12-AS1	109.626	chr7:100942058-101018936	TKS4_WT	TKS4_WT_T	26.468	55.4838	1.06781	26.468	55.4838	1.06782	0.144012	0.63615	0.19644	0.999503	lncRNA	chr7	101014319-101017665	-	ENSG00000227053.2
XLOC_026489	XLOC_026489	MYADM-AS1	92.1494	chr19:53854248-53876435	TKS4_WT	TKS4_WT_T	262.093	503.61	0.942227	262.093	503.61	0.942228	0.0750124	0.64965	0.187321	0.999503	lncRNA	chr19	53854581-53869107	-	ENSG00000228323.2
XLOC_000563	XLOC_000563	MYCL-AS1	53965.2	chr1:39895427-39901917	TKS4_WT	TKS4_WT_T	0	54.0652		0.1	54.0652	9.07856	0	1	0	1	lncRNA	chr1	39897745-39899098	+	ENSG00000236546.1
XLOC_011890	XLOC_011890	MYG1-AS1	9.05488	chr12:53295541-53299645	TKS4_WT	TKS4_WT_T	199.605	217.679	0.125059	199.605	217.679	0.125054	0.00741249	0.9321	0.0305375	0.999503	lncRNA	chr12	53298655-53300364	-	ENSG00000257605.3
XLOC_020682	XLOC_020682	MYHAS	28351.2	chr17:10383131-10625540	TKS4_WT	TKS4_WT_T	0	28.4512		0.1	28.4512	8.15235	0	1	0	1	lncRNA	chr17	10383144-10623886	+	ENSG00000272975.1
XLOC_023737	XLOC_023737	MYL12-AS1	71.6069	chr18:3247481-3278461	TKS4_WT	TKS4_WT_T	704.686	1209.29	0.779113	704.686	1209.29	0.779108	0.0233492	0.5966	0.224317	0.999503	lncRNA	chr18	3255436-3261850	-	ENSG00000264235.6
XLOC_035609	XLOC_035609	MYLK-AS1	-54.2463	chr3:123585512-123884332	TKS4_WT	TKS4_WT_T	488.166	223.354	-1.12804	488.166	223.354	-1.12804	-0.275481	0.67095	0.17331	0.999503	lncRNA	chr3	123585300-123644568	+	ENSG00000239523.7
XLOC_035610	XLOC_035610	MYLK-AS2	28351.2	chr3:123585512-123884332	TKS4_WT	TKS4_WT_T	0	28.4512		0.1	28.4512	8.15235	0	1	0	1	lncRNA	chr3	123689644-123692407	+	ENSG00000250174.5
XLOC_000349	XLOC_000349	MYOM3-AS1	-99.6799	chr1:24042273-24112135	TKS4_WT	TKS4_WT_T	31.2442	0		31.2442	0.1	-8.28744	0	1	0	1	lncRNA	chr1	24066774-24083565	+	ENSG00000230703.1
XLOC_009211	XLOC_009211	MYRF-AS1	-99.6799	chr11:61752616-61788518	TKS4_WT	TKS4_WT_T	31.2442	0		31.2442	0.1	-8.28744	0	1	0	1	lncRNA	chr11	61746493-61757655	-	ENSG00000124915.10
XLOC_025462	XLOC_025462	MZF1-AS1	-9.59899	chr19:58559185-58574797	TKS4_WT	TKS4_WT_T	1175.54	1062.7	-0.145582	1175.54	1062.7	-0.145589	-0.0455128	0.924	0.034328	0.999503	lncRNA	chr19	58559125-58574797	+	ENSG00000267858.7
XLOC_013531	XLOC_013531	N4BP2L2-IT2	-20.4888	chr13:32432416-32542710	TKS4_WT	TKS4_WT_T	10914.4	8678.17	-0.330767	10914.4	8678.17	-0.33077	-0.1139	0.8651	0.0629337	0.999503	lncRNA	chr13	32504506-32509395	-	ENSG00000281026.1
XLOC_028990	XLOC_028990	NABP1,NABP1-OT1	16.3123	chr2:191678071-191710469	TKS4_WT	TKS4_WT_T	60701.3	70603.1	0.218004	60701.3	70603.1	0.218004	0.243169	0.72355	0.140531	0.999503	protein_coding,lncRNA
XLOC_040542	XLOC_040542	NADK2-AS1	114.986	chr5:36192588-36242279	TKS4_WT	TKS4_WT_T	26.468	56.9024	1.10424	26.468	56.9024	1.10424	0	1	0	1	lncRNA	chr5	36221055-36221902	+	ENSG00000245711.2
XLOC_054238	XLOC_054238	NALT1	-8.93926	chr9:136547841-136549744	TKS4_WT	TKS4_WT_T	93.7326	85.3536	-0.135099	93.7326	85.3536	-0.135099	0	1	0	1	lncRNA	chr9	136546212-136549893	+	ENSG00000237886.1
XLOC_025096	XLOC_025096	NAPA-AS1	18.5813	chr19:47475140-47515091	TKS4_WT	TKS4_WT_T	591.451	701.35	0.245876	591.451	701.35	0.245876	0.0325857	0.8995	0.0459988	0.999503	lncRNA	chr19	47484282-47501597	+	ENSG00000268061.5
XLOC_022846	XLOC_022846	NARF-AS2	-22.3187	chr17:82454373-82490537	TKS4_WT	TKS4_WT_T	1236.24	960.327	-0.364357	1236.24	960.327	-0.364361	-0.0720143	0.8761	0.0574463	0.999503	lncRNA	chr17	82454140-82458521	-	ENSG00000265458.2
XLOC_008866	XLOC_008866	NAV2-AS2	-13.4796	chr11:19345199-20133326	TKS4_WT	TKS4_WT_T	31.2442	27.0326	-0.208887	31.2442	27.0326	-0.208888	0	1	0	1	lncRNA	chr11	20043767-20049458	-	ENSG00000254453.2
XLOC_008864	XLOC_008864	NAV2-AS6	-72.7963	chr11:19345199-20133326	TKS4_WT	TKS4_WT_T	298.113	81.0978	-1.87813	298.113	81.0978	-1.87812	-0.428669	0.477	0.321482	0.999503	lncRNA	chr11	19710934-19712619	-	ENSG00000270607.1
XLOC_037132	XLOC_037132	NCK1-DT	-19.2142	chr3:136819125-136862063	TKS4_WT	TKS4_WT_T	1151.66	930.378	-0.307823	1151.66	930.378	-0.307826	-0.119583	0.8793	0.0558629	0.999503	lncRNA	chr3	136835345-136862618	-	ENSG00000239213.7
XLOC_002817	XLOC_002817	NCMAP-DT	719.547	chr1:24496253-24556024	TKS4_WT	TKS4_WT_T	31.2442	256.061	3.03483	31.2442	256.061	3.03483	0	1	0	1	lncRNA	chr1	24538802-24556024	-	ENSG00000264443.1
XLOC_033829	XLOC_033829	NDUFA6-DT	-65.8898	chr22:42090932-42125349	TKS4_WT	TKS4_WT_T	579.71	197.74	-1.55173	579.71	197.74	-1.55173	-0.823116	0.2946	0.530767	0.999503	lncRNA	chr22	42090931-42137742	+	ENSG00000237037.9
XLOC_050408	XLOC_050408	NDUFB2-AS1	-19.2883	chr7:140695335-140706643	TKS4_WT	TKS4_WT_T	653.939	527.805	-0.30915	653.939	527.805	-0.309151	-0.0342386	0.903	0.0443122	0.999503	lncRNA	chr7	140695336-140697077	-	ENSG00000240889.1
XLOC_023773	XLOC_023773	NDUFV2-AS1	28351.2	chr18:9102641-9136720	TKS4_WT	TKS4_WT_T	0	28.4512		0.1	28.4512	8.15235	0	1	0	1	lncRNA	chr18	9121179-9136645	-	ENSG00000266053.3
XLOC_007860	XLOC_007860	NEAT1	-43.4939	chr11:65421121-65445540	TKS4_WT	TKS4_WT_T	490680	277264	-0.823521	490680	277264	-0.823522	-0.536481	0.51935	0.28454	0.999503	lncRNA	chr11	65422774-65445540	+	ENSG00000245532.10
XLOC_005112	XLOC_005112	NEBL-AS1	153.286	chr10:20779972-21293050	TKS4_WT	TKS4_WT_T	110.648	280.256	1.34076	110.648	280.256	1.34077	0.102945	0.4981	0.302683	0.999503	lncRNA	chr10	21174014-21175048	+	ENSG00000231920.1
XLOC_008390	XLOC_008390	NECTIN1-AS1	-39.2928	chr11:119631376-119729200	TKS4_WT	TKS4_WT_T	93.7326	56.9024	-0.720061	93.7326	56.9024	-0.720061	0	1	0	1	lncRNA	chr11	119709920-119713925	+	ENSG00000255247.1
XLOC_036903	XLOC_036903	NECTIN3-AS1	329.972	chr3:111045314-111069959	TKS4_WT	TKS4_WT_T	26.468	113.805	2.10424	26.468	113.805	2.10424	0	1	0	1	lncRNA	chr3	110888384-111071553	-	ENSG00000242242.7
XLOC_001668	XLOC_001668	NECTIN4-AS1	-99.8933	chr1:161070997-161089566	TKS4_WT	TKS4_WT_T	93.7326	0		93.7326	0.1	-9.87241	0	1	0	1	lncRNA	chr1	161084465-161087571	+	ENSG00000228917.1
XLOC_038568	XLOC_038568	NEUROG2-AS1	53.1994	chr4:112513515-112636995	TKS4_WT	TKS4_WT_T	52.9361	81.0978	0.615411	52.9361	81.0978	0.615411	0	1	0	1	lncRNA	chr4	112515385-112546881	+	ENSG00000249509.1
XLOC_003340	XLOC_003340	NEXN-AS1	-35.1098	chr1:77881347-78017964	TKS4_WT	TKS4_WT_T	124.977	81.0978	-0.623925	124.977	81.0978	-0.623928	0	1	0	1	lncRNA	chr1	77881348-77889539	-	ENSG00000235927.4
XLOC_048847	XLOC_048847	NFE4	53965.2	chr7:102748998-103099773	TKS4_WT	TKS4_WT_T	0	54.0652		0.1	54.0652	9.07856	0	1	0	1	lncRNA	chr7	102973483-102988856	+	ENSG00000230257.6
XLOC_003025	XLOC_003025	NFYC-AS1,RIMS3	-32.5445	chr1:40620679-40771606	TKS4_WT	TKS4_WT_T	21876.5	14756.9	-0.567995	21876.5	14756.9	-0.567992	-0.320407	0.6978	0.156269	0.999503	lncRNA,protein_coding
XLOC_045659	XLOC_045659	NHEG1	53965.2	chr6:136982158-136993231	TKS4_WT	TKS4_WT_T	0	54.0652		0.1	54.0652	9.07856	0	1	0	1	lncRNA	chr6	136982165-136993234	-	ENSG00000225391.5
XLOC_028554	XLOC_028554	NIFK-AS1	-38.5835	chr2:121649653-121736875	TKS4_WT	TKS4_WT_T	1582.11	971.676	-0.703304	1582.11	971.676	-0.703303	-0.0776391	0.7359	0.133181	0.999503	lncRNA	chr2	121649320-121728563	+	ENSG00000236859.8
XLOC_010124	XLOC_010124	NINJ2-AS1	235.45	chr12:564295-663445	TKS4_WT	TKS4_WT_T	524.186	1758.38	1.74609	524.186	1758.38	1.7461	1.19207	0.10695	0.970819	0.999503	lncRNA	chr12	630858-664196	+	ENSG00000177406.5
XLOC_041769	XLOC_041769	NIPBL-DT	33.8297	chr5:36871360-36876694	TKS4_WT	TKS4_WT_T	4946.34	6619.67	0.4204	4946.34	6619.67	0.420398	0.372839	0.59785	0.223408	0.999503	lncRNA	chr5	36864425-36876700	-	ENSG00000285967.1
XLOC_031892	XLOC_031892	NKILA	167770	chr20:57648395-57712780	TKS4_WT	TKS4_WT_T	0	167.87		0.1	167.87	10.7131		0.18075	0.742922	0.999503	lncRNA	chr20	57710156-57712780	+	ENSG00000278709.2
XLOC_015263	XLOC_015263	NKX2-1,SFTA3	95.5099	chr14:36473287-36523016	TKS4_WT	TKS4_WT_T	355.826	695.675	0.967244	355.826	695.675	0.967242	0.558639	0.5496	0.259953	0.999503	protein_coding,lncRNA
XLOC_037844	XLOC_037844	NOP14-AS1	-10.4914	chr4:2935545-3040760	TKS4_WT	TKS4_WT_T	11183.4	10010.1	-0.159908	11183.4	10010.1	-0.159902	-0.0538045	0.9096	0.0411495	0.999503	lncRNA	chr4	2934882-2961738	+	ENSG00000249673.8
XLOC_032346	XLOC_032346	NORAD	-0.501733	chr20:36045617-36050960	TKS4_WT	TKS4_WT_T	195323	194343	-0.0072607	195323	194343	-0.0072567	-0.00675179	0.9927	0.00318198	0.999503	lncRNA	chr20	36045618-36051018	-	ENSG00000260032.2
XLOC_035714	XLOC_035714	NPHP3-AS1	-25.8955	chr3:132558137-132874211	TKS4_WT	TKS4_WT_T	190.052	140.837	-0.432368	190.052	140.837	-0.432368	-0.0218485	0.8328	0.0794593	0.999503	lncRNA	chr3	132721750-132874223	+	ENSG00000248724.6
XLOC_020091	XLOC_020091	NPIPB14P,PDXDC2P,PDXDC2P-NPIPB14P	-41.458	chr16:69976296-70065948	TKS4_WT	TKS4_WT_T	40613.9	23776.2	-0.772453	40613.9	23776.2	-0.772455	-0.774622	0.3864	0.412963	0.999503	transcribed_unprocessed_pseudogene,transcribed_unprocessed_pseudogene,lncRNA
XLOC_049592	XLOC_049592	NPSR1-AS1	-99.6799	chr7:34346511-34878332	TKS4_WT	TKS4_WT_T	31.2442	0		31.2442	0.1	-8.28744	0	1	0	1	lncRNA	chr7	34346512-34871582	-	ENSG00000197085.11
XLOC_017712	XLOC_017712	NPTN-IT1	-29.7048	chr15:73560013-73633389	TKS4_WT	TKS4_WT_T	7048.85	4955	-0.508503	7048.85	4955	-0.508503	-0.186249	0.8117	0.0906045	0.999503	lncRNA	chr15	73567012-73569294	-	ENSG00000281183.1
XLOC_044480	XLOC_044480	NQO2-AS1	-1.42434	chr6:2987966-2999292	TKS4_WT	TKS4_WT_T	137.116	135.163	-0.0207005	137.116	135.163	-0.0206967	-0.00862425	0.69685	0.156861	0.999503	lncRNA	chr6	2989335-2999604	-	ENSG00000224846.3
XLOC_042149	XLOC_042149	NR2F1-AS1	-31.8704	chr5:93409355-93581320	TKS4_WT	TKS4_WT_T	21857.6	14891.5	-0.553648	21857.6	14891.5	-0.553646	-0.488632	0.5376	0.269541	0.999503	lncRNA	chr5	93360779-93585649	-	ENSG00000237187.9
XLOC_011848	XLOC_011848	NR4A1AS	-34.8678	chr12:52022831-52059507	TKS4_WT	TKS4_WT_T	262.093	170.707	-0.618556	262.093	170.707	-0.618557	-0.0572144	0.75665	0.121105	0.999503	lncRNA	chr12	52058459-52059503	-	ENSG00000259884.1
XLOC_012952	XLOC_012952	NRAD1	85253.6	chr13:44022334-44030463	TKS4_WT	TKS4_WT_T	0	85.3536		0.1	85.3536	9.73731	0	1	0	1	lncRNA	chr13	43908669-44030461	+	ENSG00000233725.7
XLOC_012443	XLOC_012443	NRAV	-16.5836	chr12:120469841-120498493	TKS4_WT	TKS4_WT_T	14227.9	11868.4	-0.261592	14227.9	11868.4	-0.261597	-0.0846576	0.9064	0.0426801	0.999503	lncRNA	chr12	120488079-120495946	-	ENSG00000248008.4
XLOC_031993	XLOC_031993	NRSN2-AS1	-3.0465	chr20:319686-325252	TKS4_WT	TKS4_WT_T	2149.68	2084.19	-0.0446367	2149.68	2084.19	-0.0446351	-0.0367667	0.9521	0.0213174	0.999503	lncRNA	chr20	316860-348490	-	ENSG00000225377.6
XLOC_043121	XLOC_043121	NUP153-AS1	4.23899	chr6:17615034-17711027	TKS4_WT	TKS4_WT_T	3155.47	3289.23	0.0598955	3155.47	3289.23	0.059895	0.00829691	0.96815	0.0140574	0.999503	lncRNA	chr6	17706257-17707344	+	ENSG00000272269.1
XLOC_034401	XLOC_034401	NUP50-DT	-3.67454	chr22:45133757-45163781	TKS4_WT	TKS4_WT_T	3977.37	3831.22	-0.0540105	3977.37	3831.22	-0.0540109	-0.0498801	0.9432	0.0253962	0.999503	lncRNA	chr22	45133020-45163781	-	ENSG00000226328.7
XLOC_006703	XLOC_006703	NUTM2A-AS1	-64.1605	chr10:87238666-87357302	TKS4_WT	TKS4_WT_T	3374.18	1209.29	-1.48037	3374.18	1209.29	-1.48038	-0.804694	0.4138	0.38321	0.999503	lncRNA	chr10	87189773-87342612	-	ENSG00000223482.9
XLOC_006648	XLOC_006648	NUTM2B-AS1	-44.8505	chr10:79691499-79850878	TKS4_WT	TKS4_WT_T	13979.1	7709.41	-0.858578	13979.1	7709.41	-0.858579	-0.726732	0.30375	0.517484	0.999503	lncRNA	chr10	79661394-79826594	-	ENSG00000225484.7
XLOC_013159	XLOC_013159	OBI1-AS1	232.127	chr13:78054854-78659165	TKS4_WT	TKS4_WT_T	300.701	998.708	1.73173	300.701	998.708	1.73173	0.175515	0.39575	0.402579	0.999503	lncRNA	chr13	77919689-78617328	+	ENSG00000234377.7
XLOC_004717	XLOC_004717	OBSCN-AS1	-33.5566	chr1:228203505-228378876	TKS4_WT	TKS4_WT_T	783.692	520.712	-0.5898	783.692	520.712	-0.589801	-0.118103	0.83875	0.0763675	0.999503	lncRNA	chr1	228203503-228213664	-	ENSG00000162913.10
XLOC_027667	XLOC_027667	ODC1-DT	-22.8602	chr2:10449727-10455552	TKS4_WT	TKS4_WT_T	110.648	85.3536	-0.374458	110.648	85.3536	-0.374453	-0.223774	0.49025	0.309582	0.999503	lncRNA	chr2	10448654-10457693	+	ENSG00000257135.8
XLOC_033832	XLOC_033832	OGFRP1	-6.35096	chr22:42160012-42283927	TKS4_WT	TKS4_WT_T	767.175	718.452	-0.0946632	767.175	718.452	-0.0946639	-0.00907047	0.95835	0.0184759	0.999503	lncRNA	chr22	42269703-42279534	+	ENSG00000182057.5
XLOC_016549	XLOC_016549	OIP5-AS1	0.415289	chr15:41282696-41332591	TKS4_WT	TKS4_WT_T	130993	131537	0.00597957	130993	131537	0.00597895	0.00548713	0.9937	0.00274471	0.999503	lncRNA	chr15	41283990-41309737	+	ENSG00000247556.6
XLOC_005744	XLOC_005744	OLMALINC	-70.4214	chr10:100373575-100388354	TKS4_WT	TKS4_WT_T	6916.51	2045.81	-1.75737	6916.51	2045.81	-1.75737	-1.47498	0.0265	1.57675	0.999503	lncRNA	chr10	100373099-100454043	+	ENSG00000235823.4
XLOC_050459	XLOC_050459	OR2A1-AS1,OR2A20P,OR2A42	-99.6222	chr7:144186082-144380632	TKS4_WT	TKS4_WT_T	26.468	0		26.468	0.1	-8.04811		0.15755	0.802582	0.999503	lncRNA,transcribed_unprocessed_pseudogene,protein_coding
XLOC_009373	XLOC_009373	OR7E11P	-99.92	chr11:67735677-67736341	TKS4_WT	TKS4_WT_T	124.977	0		124.977	0.1	-10.2874	0	1	0	1	lncRNA	chr11	67735600-67784229	-	ENSG00000254447.3
XLOC_031738	XLOC_031738	OSER1-DT	5.53122	chr20:44195938-44226027	TKS4_WT	TKS4_WT_T	2577.55	2720.12	0.0776738	2577.55	2720.12	0.0776699	0.0191956	0.9536	0.0206338	0.999503	lncRNA	chr20	44210907-44226027	+	ENSG00000223891.7
XLOC_028974	XLOC_028974	OSGEPL1-AS1	111.308	chr2:189673119-190203484	TKS4_WT	TKS4_WT_T	639.611	1351.55	1.07935	639.611	1351.55	1.07935	0.10212	0.23215	0.634231	0.999503	lncRNA
XLOC_052454	XLOC_052454	OTUD6B-AS1	48.6475	chr8:91059905-91070189	TKS4_WT	TKS4_WT_T	24979.7	37131.7	0.571897	24979.7	37131.7	0.571895	0.541109	0.46045	0.336818	0.999503	lncRNA	chr8	91059318-91070583	-	ENSG00000253738.3
XLOC_041659	XLOC_041659	OTULIN-DT	35.192	chr5:14660793-14871778	TKS4_WT	TKS4_WT_T	84.1803	113.805	0.435007	84.1803	113.805	0.435009	0.0210744	0.81215	0.0903638	0.999503	lncRNA	chr5	14661808-14664604	-	ENSG00000261360.2
XLOC_001876	XLOC_001876	OVAAL	80997.8	chr1:180558973-180566518	TKS4_WT	TKS4_WT_T	0	81.0978		0.1	81.0978	9.66352	0	1	0	1	lncRNA	chr1	180509380-180566523	+	ENSG00000236719.5
XLOC_040577	XLOC_040577	OXCT1-AS1	2.13314	chr5:41730064-41880167	TKS4_WT	TKS4_WT_T	26.468	27.0326	0.0304486	26.468	27.0326	0.0304511	0	1	0	1	lncRNA	chr5	41869927-41872241	+	ENSG00000248668.3
XLOC_033557	XLOC_033557	P2RX6,THAP7-AS1	-49.4949	chr22:20999103-21028013	TKS4_WT	TKS4_WT_T	2481.63	1253.35	-0.985496	2481.63	1253.35	-0.985499	-0.336305	0.6901	0.161088	0.999503	protein_coding,lncRNA
XLOC_000555	XLOC_000555	PABPC4-AS1	28351.2	chr1:39560815-39576790	TKS4_WT	TKS4_WT_T	0	28.4512		0.1	28.4512	8.15235	0	1	0	1	lncRNA	chr1	39565052-39573860	+	ENSG00000228060.3
XLOC_001931	XLOC_001931	PACERR	160.692	chr1:186680653-186681446	TKS4_WT	TKS4_WT_T	52.9361	138	1.38235	52.9361	138	1.38234	0.839065	0.3168	0.499215	0.999503	lncRNA	chr1	186680622-186683165	+	ENSG00000273129.2
XLOC_040057	XLOC_040057	PALLD-AS1	26932.6	chr4:168488508-169010284	TKS4_WT	TKS4_WT_T	0	27.0326		0.1	27.0326	8.07856	0	1	0	1	lncRNA	chr4	168647896-168648587	-	ENSG00000249623.1
XLOC_013501	XLOC_013501	PAN3-AS1	-27.3992	chr13:28135020-28295335	TKS4_WT	TKS4_WT_T	1937.94	1406.96	-0.461945	1937.94	1406.96	-0.461943	-0.0843203	0.8229	0.0846529	0.999503	lncRNA	chr13	28136843-28138193	-	ENSG00000261485.1
XLOC_032053	XLOC_032053	PANK2-AS1	110.127	chr20:3888231-4015588	TKS4_WT	TKS4_WT_T	449.558	944.643	1.07126	449.558	944.643	1.07126	0.116055	0.5647	0.248182	0.999503	lncRNA	chr20	3888239-3888868	-	ENSG00000229539.1
XLOC_015722	XLOC_015722	PAPOLA-DT	67.4742	chr14:96501647-96502326	TKS4_WT	TKS4_WT_T	442.593	741.229	0.743938	442.593	741.229	0.743939	0.481697	0.46225	0.335123	0.999503	lncRNA	chr14	96500810-96502321	-	ENSG00000260806.1
XLOC_055144	XLOC_055144	PAPPA-AS1	-32.4149	chr9:116153751-116402321	TKS4_WT	TKS4_WT_T	1199.82	810.899	-0.565221	1199.82	810.899	-0.565224	-0.38914	0.57055	0.243706	0.999503	lncRNA	chr9	116398157-116400606	-	ENSG00000256040.2
XLOC_017663	XLOC_017663	PAQR5-DT	-99.6799	chr15:69284055-69448427	TKS4_WT	TKS4_WT_T	31.2442	0		31.2442	0.1	-8.28744	0	1	0	1	lncRNA	chr15	69278328-69298795	-	ENSG00000261634.4
XLOC_023706	XLOC_023706	PARD6G-AS1	250.622	chr18:80147923-80247514	TKS4_WT	TKS4_WT_T	31.2442	109.549	1.80992	31.2442	109.549	1.80992	0	1	0	1	lncRNA	chr18	80147908-80179839	+	ENSG00000267270.7
XLOC_039495	XLOC_039495	PARM1-AS1	-47.4667	chr4:74933115-75080901	TKS4_WT	TKS4_WT_T	213.933	112.386	-0.928695	213.933	112.386	-0.928697	-0.0839665	0.72235	0.141252	0.999503	lncRNA	chr4	74955974-74970362	-	ENSG00000249717.1
XLOC_040658	XLOC_040658	PART1	-99.8741	chr5:58969037-60547657	TKS4_WT	TKS4_WT_T	79.4041	0		79.4041	0.1	-9.63307	0	1	0	1	lncRNA	chr5	60487713-60548813	+	ENSG00000152931.9
XLOC_030101	XLOC_030101	PARTICL	78.6833	chr2:85537466-85538886	TKS4_WT	TKS4_WT_T	1871.07	3343.29	0.837406	1871.07	3343.29	0.837405	0.701126	0.28865	0.539628	0.999503	lncRNA	chr2	85537462-85538666	-	ENSG00000286532.1
XLOC_028496	XLOC_028496	PAX8-AS1	-5.65128	chr2:113215996-113278921	TKS4_WT	TKS4_WT_T	19976	18847.1	-0.0839269	19976	18847.1	-0.0839252	-0.0695221	0.9204	0.0360234	0.999503	lncRNA	chr2	113211421-113276581	+	ENSG00000189223.15
XLOC_028497	XLOC_028497	PAX8-AS1	-40.4346	chr2:113215996-113278921	TKS4_WT	TKS4_WT_T	7707.17	4590.81	-0.747452	7707.17	4590.81	-0.747452	-0.34876	0.64455	0.190743	0.999503	lncRNA	chr2	113211421-113276581	+	ENSG00000189223.15
XLOC_032849	XLOC_032849	PAXBP1-AS1	-2.11247	chr21:32628758-32771835	TKS4_WT	TKS4_WT_T	848.768	830.838	-0.030802	848.768	830.838	-0.0308031	-0.00351048	0.98165	0.00804333	0.999503	lncRNA	chr21	32728094-32747065	+	ENSG00000238197.7
XLOC_049298	XLOC_049298	PAXIP1-AS2	-32.5165	chr7:154928516-155003419	TKS4_WT	TKS4_WT_T	1353.45	913.355	-0.567395	1353.45	913.355	-0.567394	-0.113011	0.7405	0.130475	0.999503	lncRNA	chr7	154928460-154952188	+	ENSG00000214106.9
XLOC_049299	XLOC_049299	PAXIP1-DT	15.7016	chr7:155003432-155005703	TKS4_WT	TKS4_WT_T	6312.72	7303.92	0.210409	6312.72	7303.92	0.210409	0.184224	0.80205	0.0957986	0.999503	lncRNA	chr7	155003448-155005703	+	ENSG00000273344.1
XLOC_004163	XLOC_004163	PBX1-AS1	28351.2	chr1:164559183-164886047	TKS4_WT	TKS4_WT_T	0	28.4512		0.1	28.4512	8.15235	0	1	0	1	lncRNA	chr1	164769116-164774641	-	ENSG00000233693.1
XLOC_051614	XLOC_051614	PCAT1	429.992	chr8:126552442-127049451	TKS4_WT	TKS4_WT_T	57.7122	305.87	2.40597	57.7122	305.87	2.40597	0.119707	0.3122	0.505567	0.999503	lncRNA	chr8	126556323-127419050	+	ENSG00000253438.5
XLOC_002027	XLOC_002027	PCAT6	-35.0884	chr1:202810945-202811913	TKS4_WT	TKS4_WT_T	173.137	112.386	-0.623447	173.137	112.386	-0.623452	-0.253148	0.67665	0.169636	0.999503	lncRNA	chr1	202810850-202812473	+	ENSG00000228288.8
XLOC_053832	XLOC_053832	PCAT7	-17.8184	chr9:94555044-94593824	TKS4_WT	TKS4_WT_T	2634.86	2165.37	-0.283116	2634.86	2165.37	-0.283113	-0.224728	0.7497	0.125112	0.999503	lncRNA	chr9	94555054-94603990	+	ENSG00000231806.4
XLOC_029972	XLOC_029972	PCBP1-AS1	361.164	chr2:69915108-70087375	TKS4_WT	TKS4_WT_T	6470.73	29840.7	2.20528	6470.73	29840.7	2.20528	1.79159	0.0246	1.60906	0.999503	protein_coding,lncRNA
XLOC_010615	XLOC_010615	PCBP2,PCBP2-OT1	-25.8177	chr12:53452101-53506431	TKS4_WT	TKS4_WT_T	367414	272556	-0.430856	367414	272556	-0.430854	-0.395245	0.6749	0.170761	0.999503	protein_coding,lncRNA
XLOC_013967	XLOC_013967	PCCA-DT	0.288355	chr13:100086030-100088943	TKS4_WT	TKS4_WT_T	9446.7	9473.94	0.00415387	9446.7	9473.94	0.00415409	0.00361347	0.9958	0.00182788	0.999503	lncRNA	chr13	100053074-100088967	-	ENSG00000274605.3
XLOC_011760	XLOC_011760	PCED1B-AS1	-99.6799	chr12:47075706-47236663	TKS4_WT	TKS4_WT_T	31.2442	0		31.2442	0.1	-8.28744	0	1	0	1	lncRNA	chr12	47205896-47216460	-	ENSG00000247774.8
XLOC_009523	XLOC_009523	PCF11-AS1	66.8763	chr11:83157094-83193669	TKS4_WT	TKS4_WT_T	1690.57	2821.16	0.738779	1690.57	2821.16	0.738779	0.158653	0.7346	0.133949	0.999503	lncRNA	chr11	83185521-83187036	-	ENSG00000269939.1
XLOC_050131	XLOC_050131	PCOLCE-AS1	-99.936	chr7:100574010-100608175	TKS4_WT	TKS4_WT_T	156.221	0		156.221	0.1	-10.6094	0	1	0	1	lncRNA	chr7	100589402-100604206	-	ENSG00000224729.6
XLOC_012793	XLOC_012793	PCOTH	95.4487	chr13:23715142-23897502	TKS4_WT	TKS4_WT_T	221.297	432.522	0.966791	221.297	432.522	0.96679	0.162362	0.58375	0.233773	0.999503	lncRNA	chr13	23888842-23897263	+	ENSG00000205861.13
XLOC_032939	XLOC_032939	PCSEAT	26932.6	chr21:41552803-41593324	TKS4_WT	TKS4_WT_T	0	27.0326		0.1	27.0326	8.07856	0	1	0	1	lncRNA	chr21	41580475-41582887	+	ENSG00000286027.1
XLOC_017116	XLOC_017116	PCSK6-AS1	56.2528	chr15:101303927-101489707	TKS4_WT	TKS4_WT_T	295.925	462.391	0.643885	295.925	462.391	0.643882	0.13389	0.8274	0.0822845	0.999503	lncRNA	chr15	101334437-101337428	+	ENSG00000259764.1
XLOC_001930	XLOC_001930	PDC-AS1	28351.2	chr1:186435160-186470291	TKS4_WT	TKS4_WT_T	0	28.4512		0.1	28.4512	8.15235	0	1	0	1	lncRNA	chr1	186423481-186521147	+	ENSG00000229739.4
XLOC_006913	XLOC_006913	PDCD4-AS1	89.2931	chr10:110868889-110870904	TKS4_WT	TKS4_WT_T	218.709	414.001	0.920618	218.709	414.001	0.920622	0.818882	0.45555	0.341464	0.999503	lncRNA	chr10	110869741-110872253	-	ENSG00000203497.3
XLOC_036390	XLOC_036390	PDCD6IP-DT	18.7898	chr3:33783818-33798447	TKS4_WT	TKS4_WT_T	3499.55	4157.11	0.24841	3499.55	4157.11	0.248412	0.208993	0.76435	0.116708	0.999503	lncRNA	chr3	33793644-33798539	-	ENSG00000271643.2
XLOC_028914	XLOC_028914	PDE11A-AS1	56802.4	chr2:177623243-178108339	TKS4_WT	TKS4_WT_T	0	56.9024		0.1	56.9024	9.15235	0	1	0	1	lncRNA	chr2	177653419-177723289	+	ENSG00000229941.6
XLOC_039030	XLOC_039030	PDE6B-AS1	28351.2	chr4:587324-670892	TKS4_WT	TKS4_WT_T	0	28.4512		0.1	28.4512	8.15235	0	1	0	1	lncRNA	chr4	652850-656213	-	ENSG00000242686.4
XLOC_033329	XLOC_033329	PDE9A-AS1	26932.6	chr21:42653620-42776896	TKS4_WT	TKS4_WT_T	0	27.0326		0.1	27.0326	8.07856	0	1	0	1	lncRNA	chr21	42733594-42741758	-	ENSG00000225731.1
XLOC_034276	XLOC_034276	PDXP-DT	21.4145	chr22:37639668-37658377	TKS4_WT	TKS4_WT_T	93.7326	113.805	0.279939	93.7326	113.805	0.279941	0	1	0	1	lncRNA	chr22	37641832-37658377	-	ENSG00000233360.4
XLOC_052757	XLOC_052757	PEG13	-75.9657	chr8:139727724-140458579	TKS4_WT	TKS4_WT_T	3172.58	762.508	-2.05683	3172.58	762.508	-2.05683	-0.358883	0.42475	0.371867	0.999503	lncRNA	chr8	140094894-140100543	-	ENSG00000282164.3
XLOC_031830	XLOC_031830	PELATON	79.0946	chr20:50267477-50279788	TKS4_WT	TKS4_WT_T	93.7326	167.87	0.840722	93.7326	167.87	0.840722	0.570079	0.5288	0.276709	0.999503	lncRNA	chr20	50247643-50283250	+	ENSG00000224397.8
XLOC_006063	XLOC_006063	PFKP-DT	389.483	chr10:3052493-3066933	TKS4_WT	TKS4_WT_T	62.4884	305.87	2.29126	62.4884	305.87	2.29126	1.90463	0.291	0.536107	0.999503	lncRNA	chr10	3065424-3066001	-	ENSG00000273001.1
XLOC_025849	XLOC_025849	PGLS-DT	26.4265	chr19:17468744-17521291	TKS4_WT	TKS4_WT_T	423.09	534.898	0.338299	423.09	534.898	0.338299	0.0479068	0.8644	0.0632852	0.999503	lncRNA	chr19	17488990-17511889	-	ENSG00000269439.7
XLOC_053204	XLOC_053204	PGM5P3-AS1	7.49282	chr9:72689-88826	TKS4_WT	TKS4_WT_T	26.468	28.4512	0.104237	26.468	28.4512	0.10424	0	1	0	1	lncRNA	chr9	72656-90820	+	ENSG00000277631.6
XLOC_045706	XLOC_045706	PHACTR2-AS1	-8.93926	chr6:143554114-143569339	TKS4_WT	TKS4_WT_T	31.2442	28.4512	-0.135099	31.2442	28.4512	-0.135099	0	1	0	1	lncRNA	chr6	143554325-143562031	-	ENSG00000235740.2
XLOC_000486	XLOC_000486	PHC2-AS1	-99.6799	chr1:33323622-33431095	TKS4_WT	TKS4_WT_T	31.2442	0		31.2442	0.1	-8.28744	0	1	0	1	lncRNA	chr1	33350352-33363245	+	ENSG00000233246.1
XLOC_055675	XLOC_055675	PHKA2-AS1	199058	chrX:18890295-18984114	TKS4_WT	TKS4_WT_T	0	199.158		0.1	199.158	10.9597	0	1	0	1	lncRNA	chrX	18890296-18894974	+	ENSG00000237836.6
XLOC_022467	XLOC_022467	PICART1	48.6144	chr17:50050348-50055739	TKS4_WT	TKS4_WT_T	413.538	614.577	0.571575	413.538	614.577	0.571574	0.367608	0.58845	0.23029	0.999503	lncRNA	chr17	50050349-50055746	-	ENSG00000246640.2
XLOC_002621	XLOC_002621	PIK3CD-AS2	-62.8912	chr1:9629888-9824526	TKS4_WT	TKS4_WT_T	3615.37	1341.62	-1.43017	3615.37	1341.62	-1.43017	-0.179842	0.41265	0.384418	0.999503	lncRNA	chr1	9672405-9687573	-	ENSG00000231789.3
XLOC_048796	XLOC_048796	PILRB,PVRIG2P,STAG3L5P,STAG3L5P-PVRIG2P-PILRB	0.0459022	chr7:100306797-100367831	TKS4_WT	TKS4_WT_T	46403	46424.3	0.000662324	46403	46424.3	0.000662077	0.000587242	0.99945	0.000238928	0.999654	protein_coding,transcribed_unprocessed_pseudogene,transcribed_unprocessed_pseudogene,lncRNA
XLOC_055809	XLOC_055809	PINCR	113705	chrX:43176993-43226598	TKS4_WT	TKS4_WT_T	0	113.805		0.1	113.805	10.1523	0	1	0	1	lncRNA	chrX	43176994-43226598	+	ENSG00000224294.1
XLOC_020520	XLOC_020520	PITPNA-AS1	-41.3268	chr17:1516918-1562803	TKS4_WT	TKS4_WT_T	8591.37	5040.83	-0.769226	8591.37	5040.83	-0.769227	-0.241071	0.76915	0.113989	0.999503	lncRNA	chr17	1516877-1518101	+	ENSG00000236618.3
XLOC_011239	XLOC_011239	PITPNM2-AS1	56802.4	chr12:122983479-123151090	TKS4_WT	TKS4_WT_T	0	56.9024		0.1	56.9024	9.15235	0	1	0	1	lncRNA	chr12	123081384-123084744	+	ENSG00000251497.2
XLOC_004974	XLOC_004974	PITRM1-AS1	-72.5233	chr10:3137726-3172841	TKS4_WT	TKS4_WT_T	610.954	167.87	-1.86372	610.954	167.87	-1.86372	-0.140492	0.3701	0.431681	0.999503	lncRNA	chr10	3141632-3167972	+	ENSG00000237399.7
XLOC_003406	XLOC_003406	PKN2-AS1	1657.7	chr1:88537512-88836255	TKS4_WT	TKS4_WT_T	26.468	465.229	4.13562	26.468	465.229	4.13562	0.426649	0.2754	0.560036	0.999503	lncRNA	chr1	87620803-88685204	-	ENSG00000237505.8
XLOC_030691	XLOC_030691	PKP4-AS1	173.182	chr2:158456879-158735002	TKS4_WT	TKS4_WT_T	62.4884	170.707	1.44986	62.4884	170.707	1.44986	0	1	0	1	lncRNA	chr2	158658337-158735002	-	ENSG00000204380.4
XLOC_016561	XLOC_016561	PLA2G4E-AS1	-66.2021	chr15:41972762-42050703	TKS4_WT	TKS4_WT_T	84.1803	28.4512	-1.56499	84.1803	28.4512	-1.56499	-0.856187	0.54475	0.263803	0.999503	lncRNA	chr15	41972763-41999094	+	ENSG00000246740.2
XLOC_033305	XLOC_033305	PLAC4	2.64794	chr21:41168159-41282530	TKS4_WT	TKS4_WT_T	271.645	278.838	0.0377003	271.645	278.838	0.0377047	0.00417383	0.94745	0.0234437	0.999503	lncRNA	chr21	41175231-41186788	-	ENSG00000280109.3
XLOC_031418	XLOC_031418	PLCB1-IT1	-99.6799	chr20:8132265-8884900	TKS4_WT	TKS4_WT_T	31.2442	0		31.2442	0.1	-8.28744	0	1	0	1	lncRNA	chr20	8248704-8256918	+	ENSG00000225479.1
XLOC_032396	XLOC_032396	PLCG1-AS1	-60.5697	chr20:41028821-41177626	TKS4_WT	TKS4_WT_T	137.116	54.0652	-1.34263	137.116	54.0652	-1.34262	-0.0404946	0.576	0.239578	0.999503	lncRNA	chr20	41098019-41138003	-	ENSG00000226648.2
XLOC_036905	XLOC_036905	PLCXD2-AS1	416.027	chr3:111674675-111976517	TKS4_WT	TKS4_WT_T	26.468	136.582	2.36744	26.468	136.582	2.36745	0.0474518	0.3855	0.413976	0.999503	lncRNA	chr3	111676736-111677433	-	ENSG00000240766.1
XLOC_057373	XLOC_057373	PLS3-AS1	-78.6778	chrX:115518188-115650861	TKS4_WT	TKS4_WT_T	266.869	56.9024	-2.22957	266.869	56.9024	-2.22957	-0.207562	0.42685	0.369725	0.999503	lncRNA	chrX	115518182-115562731	-	ENSG00000271826.5
XLOC_013496	XLOC_013496	PLUT	-99.84	chr13:27819091-27917291	TKS4_WT	TKS4_WT_T	62.4884	0		62.4884	0.1	-9.28744	0	1	0	1	lncRNA	chr13	27819376-27917298	-	ENSG00000247381.3
XLOC_010921	XLOC_010921	POC1B-AS1	49.8731	chr12:89419717-89541542	TKS4_WT	TKS4_WT_T	738.518	1106.84	0.58374	738.518	1106.84	0.583742	0.102197	0.7882	0.103364	0.999503	lncRNA	chr12	89524594-89548005	+	ENSG00000270344.3
XLOC_049659	XLOC_049659	POLR2J4	-40.2456	chr7:43866557-44019194	TKS4_WT	TKS4_WT_T	2685.61	1604.77	-0.742879	2685.61	1604.77	-0.742883	-0.112103	0.70655	0.150857	0.999503	lncRNA	chr7	43940895-44019175	-	ENSG00000214783.9
XLOC_048974	XLOC_048974	POT1-AS1	268.975	chr7:124929872-125145234	TKS4_WT	TKS4_WT_T	141.893	523.55	1.88353	141.893	523.55	1.88352	0.877413	0.20075	0.697344	0.999503	lncRNA	chr7	124929873-125482966	+	ENSG00000224897.9
XLOC_041570	XLOC_041570	PP7080,SLC9A3	6.52037	chr5:470455-524449	TKS4_WT	TKS4_WT_T	16847.2	17945.7	0.0911291	16847.2	17945.7	0.0911294	0.0835105	0.9086	0.0416273	0.999503	lncRNA,protein_coding
XLOC_041055	XLOC_041055	PPIC-AS1	-99.9499	chr5:122845509-123075711	TKS4_WT	TKS4_WT_T	199.605	0		199.605	0.1	-10.9629		0.1357	0.86742	0.999503	lncRNA	chr5	123036271-123054667	+	ENSG00000249996.1
XLOC_033579	XLOC_033579	PPM1F-AS1	125.143	chr22:21919418-21952875	TKS4_WT	TKS4_WT_T	209.157	470.903	1.17084	209.157	470.903	1.17084	0.11262	0.5697	0.244354	0.999503	lncRNA	chr22	21938269-21977632	+	ENSG00000224086.6
XLOC_001204	XLOC_001204	PPM1J-DT	259.702	chr1:112715690-112717794	TKS4_WT	TKS4_WT_T	31.2442	112.386	1.8468	31.2442	112.386	1.8468	1.12813	0.40005	0.397886	0.999503	lncRNA	chr1	112715672-112717796	+	ENSG00000261595.1
XLOC_010877	XLOC_010877	PPP1R12A-AS1	-52.6679	chr12:79715231-79941395	TKS4_WT	TKS4_WT_T	288.561	136.582	-1.07911	288.561	136.582	-1.07911	-0.0504844	0.5567	0.254379	0.999503	lncRNA	chr12	79934901-79942712	+	ENSG00000257557.2
XLOC_007830	XLOC_007830	PPP1R14B-AS1	-9.07843	chr11:64244478-64248214	TKS4_WT	TKS4_WT_T	810.559	736.973	-0.137304	810.559	736.973	-0.137305	-0.00738288	0.92445	0.0341166	0.999503	lncRNA	chr11	64245942-64248218	+	ENSG00000256940.3
XLOC_055339	XLOC_055339	PPP1R26-AS1	-57.1598	chr9:135462717-135472249	TKS4_WT	TKS4_WT_T	1185.49	507.866	-1.22296	1185.49	507.866	-1.22296	-0.70897	0.34615	0.460736	0.999503	lncRNA	chr9	135462727-135480777	-	ENSG00000225361.4
XLOC_048800	XLOC_048800	PPP1R35-AS1	120.841	chr7:100435281-100440066	TKS4_WT	TKS4_WT_T	62.4884	138	1.14301	62.4884	138	1.14301	0.136804	0.37665	0.424062	0.999503	lncRNA	chr7	100436204-100438504	+	ENSG00000240211.1
XLOC_050060	XLOC_050060	PPP1R9A-AS1	-13.4796	chr7:94907201-95296421	TKS4_WT	TKS4_WT_T	62.4884	54.0652	-0.208887	62.4884	54.0652	-0.208888	0	1	0	1	lncRNA	chr7	95035731-95214338	-	ENSG00000236197.4
XLOC_005506	XLOC_005506	PPP3CB-AS1	-4.30828	chr10:73436432-73626906	TKS4_WT	TKS4_WT_T	1067.48	1021.49	-0.0635368	1067.48	1021.49	-0.063534	-0.00849793	0.9713	0.0126466	0.999503	lncRNA	chr10	73495525-73520070	+	ENSG00000221817.11
XLOC_023297	XLOC_023297	PPP4R1-AS1	55383.8	chr18:9546793-9619363	TKS4_WT	TKS4_WT_T	0	55.4838		0.1	55.4838	9.11592		0.16505	0.782384	0.999503	lncRNA	chr18	9615264-9619363	+	ENSG00000263627.1
XLOC_012088	XLOC_012088	PRANCR	47.6625	chr12:70222189-70355257	TKS4_WT	TKS4_WT_T	843.992	1246.26	0.562302	843.992	1246.26	0.562304	0.0750246	0.77145	0.112692	0.999503	lncRNA	chr12	69901918-70243398	-	ENSG00000257815.8
XLOC_017039	XLOC_017039	PRC1-AS1	-31.187	chr15:90966037-90994576	TKS4_WT	TKS4_WT_T	324.581	223.354	-0.53925	324.581	223.354	-0.539246	-0.022656	0.80405	0.0947169	0.999503	lncRNA	chr15	90966340-90988625	+	ENSG00000258725.2
XLOC_002553	XLOC_002553	PRDM16-DT	2.85747	chr1:3059616-3067725	TKS4_WT	TKS4_WT_T	302.89	311.545	0.0406464	302.89	311.545	0.0406466	0.0195836	0.9241	0.034281	0.999503	lncRNA	chr1	3059611-3069088	-	ENSG00000177133.13
XLOC_004242	XLOC_004242	PRDX6-AS1,TNFSF4	-12.1376	chr1:173183728-173477155	TKS4_WT	TKS4_WT_T	11478.4	10085.2	-0.186677	11478.4	10085.2	-0.186682	-0.165464	0.82345	0.0843628	0.999503	lncRNA,protein_coding
XLOC_014031	XLOC_014031	PRECSIT	11.1152	chr13:110863986-110870308	TKS4_WT	TKS4_WT_T	8547.58	9497.66	0.152056	8547.58	9497.66	0.152056	0.131815	0.8602	0.0654006	0.999503	lncRNA	chr13	110863987-110870330	-	ENSG00000255874.3
XLOC_049279	XLOC_049279	PRKAG2-AS1	121.207	chr7:151556114-151879223	TKS4_WT	TKS4_WT_T	413.538	914.773	1.14539	413.538	914.773	1.14539	0.179723	0.5729	0.241921	0.999503	lncRNA	chr7	151877042-151879229	+	ENSG00000239911.3
XLOC_035113	XLOC_035113	PRKAR2A-AS1	-53.0761	chr3:48847936-48851982	TKS4_WT	TKS4_WT_T	1173.35	550.582	-1.0916	1173.35	550.582	-1.0916	-0.689044	0.3265	0.486117	0.999503	lncRNA	chr3	48847572-48851981	+	ENSG00000224424.8
XLOC_005019	XLOC_005019	PRKCQ-AS1	73.9062	chr10:6393037-6585361	TKS4_WT	TKS4_WT_T	3182.33	5534.27	0.798309	3182.33	5534.27	0.79831	0.564765	0.4939	0.306361	0.999503	lncRNA	chr10	6580419-6616921	+	ENSG00000237943.8
XLOC_002542	XLOC_002542	PRKCZ-AS1	-8.93926	chr1:2050410-2212720	TKS4_WT	TKS4_WT_T	62.4884	56.9024	-0.135099	62.4884	56.9024	-0.135099	0	1	0	1	lncRNA	chr1	2181794-2184389	-	ENSG00000182873.5
XLOC_006458	XLOC_006458	PRKG1-AS1	-3.49548	chr10:50990887-52314128	TKS4_WT	TKS4_WT_T	1724.8	1664.51	-0.0513288	1724.8	1664.51	-0.0513315	-0.0130932	0.9724	0.012155	0.999503	lncRNA	chr10	52230398-52314507	-	ENSG00000236671.9
XLOC_014218	XLOC_014218	PRMT5-AS1	136.257	chr14:22919455-22929392	TKS4_WT	TKS4_WT_T	2025.1	4784.45	1.24036	2025.1	4784.45	1.24036	0.15361	0.48265	0.316368	0.999503	lncRNA	chr14	22918947-22926900	+	ENSG00000237054.9
XLOC_051615	XLOC_051615	PRNCR1	-7.39784	chr8:127072693-127092595	TKS4_WT	TKS4_WT_T	1447.18	1340.12	-0.110883	1447.18	1340.12	-0.110882	-0.0767518	0.9061	0.0428239	0.999503	lncRNA	chr8	127079874-127092600	+	ENSG00000282961.1
XLOC_006145	XLOC_006145	PROSER2-AS1	58.3214	chr10:11823340-11894710	TKS4_WT	TKS4_WT_T	88.9564	140.837	0.66286	88.9564	140.837	0.662856	0.0389402	0.74765	0.126302	0.999503	lncRNA	chr10	11849608-11894700	-	ENSG00000225778.5
XLOC_034417	XLOC_034417	PRR34	111.558	chr22:46048530-46058522	TKS4_WT	TKS4_WT_T	358.413	758.252	1.08105	358.413	758.252	1.08105	0.374178	0.67125	0.173116	0.999503	lncRNA	chr22	46049478-46054144	-	ENSG00000182257.8
XLOC_033879	XLOC_033879	PRR34-AS1	-8.02027	chr22:46048530-46058522	TKS4_WT	TKS4_WT_T	1854.55	1705.81	-0.120613	1854.55	1705.81	-0.120612	-0.0779995	0.9112	0.0403863	0.999503	lncRNA	chr22	46053705-46057210	+	ENSG00000241990.5
XLOC_042731	XLOC_042731	PRR7-AS1	-10.6853	chr5:177426495-177480368	TKS4_WT	TKS4_WT_T	406.174	362.773	-0.163034	406.174	362.773	-0.163031	-0.0103071	0.90775	0.0420337	0.999503	lncRNA	chr5	177438503-177447982	-	ENSG00000246334.3
XLOC_034774	XLOC_034774	PRRT3-AS1	100.69	chr3:9945541-9954787	TKS4_WT	TKS4_WT_T	1645.4	3302.15	1.00497	1645.4	3302.15	1.00497	0.515093	0.56835	0.245384	0.999503	lncRNA	chr3	9947404-9954787	+	ENSG00000230082.1
XLOC_055279	XLOC_055279	PRRX2-AS1	-99.6799	chr9:129665646-129722674	TKS4_WT	TKS4_WT_T	31.2442	0		31.2442	0.1	-8.28744	0	1	0	1	lncRNA	chr9	129712896-129718635	-	ENSG00000236024.1
XLOC_019451	XLOC_019451	PRSS30P	167.637	chr16:2839572-2842751	TKS4_WT	TKS4_WT_T	3404.62	9112.03	1.42028	3404.62	9112.03	1.42028	1.21515	0.08005	1.09664	0.999503	lncRNA	chr16	2839568-2842744	-	ENSG00000172460.18
XLOC_025005	XLOC_025005	PSG8-AS1	-99.9467	chr19:42821862-42826878	TKS4_WT	TKS4_WT_T	187.465	0		187.465	0.1	-10.8724	0	1	0	1	lncRNA	chr19	42821774-42826878	+	ENSG00000225877.2
XLOC_015399	XLOC_015399	PSMA3-AS1	-4.62159	chr14:58244842-58298137	TKS4_WT	TKS4_WT_T	11134.7	10620.1	-0.0682622	11134.7	10620.1	-0.0682653	-0.0153719	0.9704	0.0130492	0.999503	lncRNA	chr14	58265365-58298134	-	ENSG00000257621.9
XLOC_043490	XLOC_043490	PSMB8-AS1	32.2127	chr6:32840716-32853704	TKS4_WT	TKS4_WT_T	399.209	527.805	0.40286	399.209	527.805	0.402861	0.0483257	0.8149	0.0888957	0.999503	lncRNA	chr6	32844078-32846500	+	ENSG00000204261.9
XLOC_035248	XLOC_035248	PSMD6-AS2	-48.8354	chr3:64004021-64026360	TKS4_WT	TKS4_WT_T	4254.19	2176.64	-0.966784	4254.19	2176.64	-0.966782	-0.2099	0.67225	0.172469	0.999503	lncRNA	chr3	64004022-64012148	+	ENSG00000239653.1
XLOC_020133	XLOC_020133	PSMD7-DT	26932.6	chr16:74192391-74215521	TKS4_WT	TKS4_WT_T	0	27.0326		0.1	27.0326	8.07856	0	1	0	1	lncRNA	chr16	73943078-74296762	-	ENSG00000261404.7
XLOC_048016	XLOC_048016	PSMG3-AS1	-31.8025	chr7:1567331-1589626	TKS4_WT	TKS4_WT_T	1372.56	936.052	-0.552204	1372.56	936.052	-0.552209	-0.0873351	0.8473	0.0719628	0.999503	lncRNA	chr7	1570073-1589626	+	ENSG00000230487.9
XLOC_054100	XLOC_054100	PTGES2-AS1	-60.6894	chr9:128128528-128130634	TKS4_WT	TKS4_WT_T	351.05	138	-1.347	351.05	138	-1.34701	-0.666255	0.35395	0.451058	0.999503	lncRNA	chr9	128128529-128130628	+	ENSG00000232850.3
XLOC_026361	XLOC_026361	PTOV1-AS1	-0.2899	chr19:49818288-49860744	TKS4_WT	TKS4_WT_T	817.524	815.154	-0.00418684	817.524	815.154	-0.00418844	-0.000416972	0.98115	0.00826459	0.999503	lncRNA	chr19	49838639-49851676	-	ENSG00000268006.1
XLOC_026362	XLOC_026362	PTOV1-AS2	0.597554	chr19:49818288-49860744	TKS4_WT	TKS4_WT_T	1971.37	1983.15	0.00859646	1971.37	1983.15	0.00859523	0.0013128	0.9915	0.00370728	0.999503	lncRNA	chr19	49856970-49859289	-	ENSG00000269352.1
XLOC_036679	XLOC_036679	PTPRG-AS1	-54.4696	chr3:61561570-62318947	TKS4_WT	TKS4_WT_T	62.4884	28.4512	-1.1351	62.4884	28.4512	-1.1351	0	1	0	1	lncRNA	chr3	62221249-62369406	-	ENSG00000241472.7
XLOC_044142	XLOC_044142	PTPRK-AS1	73.0408	chr6:127968784-128520603	TKS4_WT	TKS4_WT_T	31.2442	54.0652	0.791113	31.2442	54.0652	0.791112	0	1	0	1	lncRNA	chr6	128027886-128085248	+	ENSG00000227945.1
XLOC_040493	XLOC_040493	PURPL	74.0279	chr5:27472291-27496401	TKS4_WT	TKS4_WT_T	204.381	355.68	0.799318	204.381	355.68	0.799319	0.370979	0.6386	0.194771	0.999503	lncRNA	chr5	27217714-27496994	+	ENSG00000250337.8
XLOC_051620	XLOC_051620	PVT1	22.6707	chr8:127794532-128101253	TKS4_WT	TKS4_WT_T	18702.1	22942	0.294787	18702.1	22942	0.294791	0.296742	0.67925	0.16797	0.999503	lncRNA	chr8	127794526-128187101	+	ENSG00000249859.13
XLOC_011192	XLOC_011192	PXN-AS1	1.53486	chr12:120201290-120265737	TKS4_WT	TKS4_WT_T	3692.19	3748.86	0.0219752	3692.19	3748.86	0.0219752	0.00351213	0.99145	0.00372918	0.999503	lncRNA	chr12	120201274-120213231	+	ENSG00000255857.7
XLOC_018826	XLOC_018826	PYCARD-AS1	0.536883	chr16:31201485-31203452	TKS4_WT	TKS4_WT_T	1165.99	1172.25	0.00773341	1165.99	1172.25	0.00772486	0.00527404	0.98515	0.00649764	0.999503	lncRNA	chr16	31201885-31203452	+	ENSG00000261359.2
XLOC_025644	XLOC_025644	RAB11B-AS1	-41.6545	chr19:8374375-8404434	TKS4_WT	TKS4_WT_T	1575.15	919.029	-0.777303	1575.15	919.029	-0.777307	-0.142762	0.7264	0.138824	0.999503	lncRNA	chr19	8374372-8390685	-	ENSG00000269386.6
XLOC_008107	XLOC_008107	RAB30-DT	174.248	chr11:83072065-83073712	TKS4_WT	TKS4_WT_T	2085.4	5719.17	1.45548	2085.4	5719.17	1.45548	1.14958	0.12075	0.918113	0.999503	lncRNA	chr11	83072052-83107789	+	ENSG00000246067.9
XLOC_039881	XLOC_039881	RAB33B-AS1	-13.0708	chr4:139451674-139476609	TKS4_WT	TKS4_WT_T	2392.67	2079.93	-0.202084	2392.67	2079.93	-0.202086	-0.0832051	0.82015	0.0861067	0.999503	lncRNA	chr4	139411927-139454034	-	ENSG00000273247.6
XLOC_021109	XLOC_021109	RAB5C-AS1	50.254	chr17:42124978-42181275	TKS4_WT	TKS4_WT_T	93.7326	140.837	0.587408	93.7326	140.837	0.587404	0.0436368	0.7907	0.101988	0.999503	lncRNA	chr17	42154600-42155972	+	ENSG00000267658.1
XLOC_051542	XLOC_051542	RAD21-AS1	288.019	chr8:116845933-116876868	TKS4_WT	TKS4_WT_T	146.669	569.103	1.95613	146.669	569.103	1.95613	0.042817	0.45655	0.340512	0.999503	lncRNA	chr8	116874424-116876868	+	ENSG00000253327.2
XLOC_017368	XLOC_017368	RAD51-AS1	-28.9131	chr15:40693733-40732340	TKS4_WT	TKS4_WT_T	1793.06	1274.63	-0.492345	1793.06	1274.63	-0.492345	-0.144846	0.85065	0.0702491	0.999503	lncRNA	chr15	40686183-40695107	-	ENSG00000245849.8
XLOC_044274	XLOC_044274	RAET1E-AS1	-17.0946	chr6:149818756-149923133	TKS4_WT	TKS4_WT_T	1510.07	1251.93	-0.27046	1510.07	1251.93	-0.270462	-0.0638543	0.9026	0.0445047	0.999503	lncRNA	chr6	149884431-149919508	+	ENSG00000223701.3
XLOC_004291	XLOC_004291	RALGPS2-AS1	171.061	chr1:178724250-178921842	TKS4_WT	TKS4_WT_T	177.913	482.252	1.43862	177.913	482.252	1.43862	0.124872	0.57725	0.238636	0.999503	lncRNA	chr1	178724306-178726285	-	ENSG00000273062.1
XLOC_032311	XLOC_032311	RALY-AS1	83.9604	chr20:33992487-34084884	TKS4_WT	TKS4_WT_T	916.431	1685.87	0.879397	916.431	1685.87	0.879395	0.0937628	0.6287	0.201557	0.999503	lncRNA	chr20	33980679-33994357	-	ENSG00000285230.3
XLOC_056444	XLOC_056444	RAP2C-AS1	-85.4377	chrX:132203023-132490035	TKS4_WT	TKS4_WT_T	781.503	113.805	-2.77969	781.503	113.805	-2.77969	-0.556982	0.33945	0.469224	0.999503	lncRNA	chrX	132217053-132432862	+	ENSG00000232160.7
XLOC_022209	XLOC_022209	RARA-AS1	36.6512	chr17:40309179-40357643	TKS4_WT	TKS4_WT_T	2096.74	2865.22	0.450493	2096.74	2865.22	0.450498	0.158414	0.83745	0.0770411	0.999503	lncRNA	chr17	40340867-40343136	-	ENSG00000265666.1
XLOC_014068	XLOC_014068	RASA3-IT1	-20.0566	chr13:113977782-114132623	TKS4_WT	TKS4_WT_T	459.11	367.028	-0.32295	459.11	367.028	-0.32295	-0.044888	0.86615	0.0624069	0.999503	lncRNA	chr13	114107569-114108820	-	ENSG00000232487.1
XLOC_004285	XLOC_004285	RASAL2-AS1	-51.5009	chr1:178091507-178499623	TKS4_WT	TKS4_WT_T	574.934	278.838	-1.04397	574.934	278.838	-1.04397	-0.0958422	0.59605	0.224717	0.999503	lncRNA	chr1	178090677-178093984	-	ENSG00000224687.2
XLOC_035140	XLOC_035140	RASSF1-AS1	145.31	chr3:50329785-50340836	TKS4_WT	TKS4_WT_T	249.953	613.159	1.2946	249.953	613.159	1.2946	0.324303	0.61265	0.212788	0.999503	lncRNA	chr3	50337511-50338300	+	ENSG00000281358.1
XLOC_011634	XLOC_011634	RASSF8-AS1	-27.7125	chr12:25954653-26079889	TKS4_WT	TKS4_WT_T	194.829	140.837	-0.468175	194.829	140.837	-0.468182	-0.0429269	0.81005	0.0914882	0.999503	lncRNA	chr12	25936683-25959765	-	ENSG00000246695.9
XLOC_013673	XLOC_013673	RB1-DT	2.13295	chr13:48296512-48303702	TKS4_WT	TKS4_WT_T	52.9361	54.0652	0.0304486	52.9361	54.0652	0.0304484	0	1	0	1	lncRNA	chr13	48296162-48303702	-	ENSG00000231473.4
XLOC_048050	XLOC_048050	RBAK,RBAK-RBAKDN,RBAKDN	-7.96145	chr7:5045859-5073223	TKS4_WT	TKS4_WT_T	56607.8	52101	-0.119688	56607.8	52101	-0.11969	-0.122304	0.86465	0.0631597	0.999503	protein_coding,protein_coding,lncRNA
XLOC_023703	XLOC_023703	RBFADN	56802.4	chr18:80067255-80081304	TKS4_WT	TKS4_WT_T	0	56.9024		0.1	56.9024	9.15235	0	1	0	1	lncRNA	chr18	80046900-80095482	+	ENSG00000261126.7
XLOC_003573	XLOC_003573	RBM15-AS1	89.1463	chr1:110286374-110339171	TKS4_WT	TKS4_WT_T	146.669	277.419	0.919506	146.669	277.419	0.919503	0.452205	0.52725	0.277983	0.999503	lncRNA	chr1	110286375-110339171	-	ENSG00000227963.2
XLOC_013169	XLOC_013169	RBM26-AS1	-47.1369	chr13:79406308-79429381	TKS4_WT	TKS4_WT_T	1717.04	907.68	-0.919666	1717.04	907.68	-0.919668	-0.688356	0.31875	0.49655	0.999503	lncRNA	chr13	79406293-79427317	+	ENSG00000227354.7
XLOC_032555	XLOC_032555	RBM38-AS1	85253.6	chr20:57384159-57409333	TKS4_WT	TKS4_WT_T	0	85.3536		0.1	85.3536	9.73731	0	1	0	1	lncRNA	chr20	57376881-57393062	-	ENSG00000218018.4
XLOC_036570	XLOC_036570	RBM5-AS1	190.874	chr3:50088918-50189075	TKS4_WT	TKS4_WT_T	57.7122	167.87	1.5404	57.7122	167.87	1.5404	0.0534019	0.51835	0.285377	0.999503	lncRNA	chr3	50099603-50100988	-	ENSG00000281691.1
XLOC_052046	XLOC_052046	RBPMS-AS1	-99.9055	chr8:30382118-30578047	TKS4_WT	TKS4_WT_T	105.872	0		105.872	0.1	-10.0481	0	1	0	1	lncRNA	chr8	30382119-30385401	-	ENSG00000254109.6
XLOC_002816	XLOC_002816	RCAN3AS	-99.6799	chr1:24496253-24556024	TKS4_WT	TKS4_WT_T	31.2442	0		31.2442	0.1	-8.28744	0	1	0	1	lncRNA	chr1	24496254-24535400	-	ENSG00000286061.1
XLOC_000430	XLOC_000430	RCC1,SNHG3	5.39973	chr1:28505942-28538989	TKS4_WT	TKS4_WT_T	239401	252328	0.0758755	239401	252328	0.0758711	0.0786802	0.91535	0.0384128	0.999503	lncRNA
XLOC_000267	XLOC_000267	RCC2-AS1	169.914	chr1:17406759-17439677	TKS4_WT	TKS4_WT_T	115.424	311.545	1.43249	115.424	311.545	1.4325	0.0344256	0.54305	0.26516	0.999503	lncRNA	chr1	17406760-17407382	+	ENSG00000227751.1
XLOC_017914	XLOC_017914	RCCD1-AS1	-82.6076	chr15:90929967-90954493	TKS4_WT	TKS4_WT_T	163.584	28.4512	-2.52347	163.584	28.4512	-2.52347	-0.174145	0.42615	0.370438	0.999503	lncRNA	chr15	90952239-90955225	-	ENSG00000258384.1
XLOC_052330	XLOC_052330	RDH10-AS1	-99.6222	chr8:73294601-73356461	TKS4_WT	TKS4_WT_T	26.468	0		26.468	0.1	-8.04811	0	1	0	1	lncRNA	chr8	73297711-73356461	-	ENSG00000250295.6
XLOC_007871	XLOC_007871	RELA-DT	10.5447	chr11:65662977-65671737	TKS4_WT	TKS4_WT_T	1204.59	1331.61	0.144627	1204.59	1331.61	0.144629	0.11275	0.8901	0.0505612	0.999503	lncRNA	chr11	65663001-65671718	+	ENSG00000285533.3
XLOC_050500	XLOC_050500	REPIN1-AS1	410.666	chr7:150362657-150374044	TKS4_WT	TKS4_WT_T	26.468	135.163	2.35238	26.468	135.163	2.35238	0	1	0	1	lncRNA	chr7	150363777-150372590	-	ENSG00000240449.1
XLOC_000127	XLOC_000127	RERE-AS1	-99.8267	chr1:8352403-8817640	TKS4_WT	TKS4_WT_T	57.7122	0		57.7122	0.1	-9.17273		0.19155	0.717718	0.999503	lncRNA	chr1	8424645-8435013	+	ENSG00000232912.6
XLOC_034163	XLOC_034163	RFPL1S	32.0507	chr22:29403030-29442490	TKS4_WT	TKS4_WT_T	62.4884	82.5164	0.401093	62.4884	82.5164	0.401092	0.0933826	0.65355	0.184721	0.999503	lncRNA	chr22	29436534-29478868	-	ENSG00000225465.10
XLOC_034219	XLOC_034219	RFPL3S	-26.0521	chr22:32205114-32371264	TKS4_WT	TKS4_WT_T	115.424	85.3536	-0.435426	115.424	85.3536	-0.435419	-0.0535178	0.78975	0.10251	0.999503	lncRNA	chr22	32359886-32382106	-	ENSG00000205853.12
XLOC_001463	XLOC_001463	RFX5-AS1	-63.2525	chr1:151340639-151347891	TKS4_WT	TKS4_WT_T	298.113	109.549	-1.44429	298.113	109.549	-1.44428	-0.0625711	0.52105	0.283121	0.999503	lncRNA	chr1	151346938-151348027	+	ENSG00000237976.2
XLOC_042183	XLOC_042183	RGMB-AS1	255.164	chr5:98768631-98796494	TKS4_WT	TKS4_WT_T	31.2442	110.968	1.82848	31.2442	110.968	1.82848	0.161556	0.4764	0.322028	0.999503	lncRNA	chr5	98769618-98773469	-	ENSG00000246763.7
XLOC_029796	XLOC_029796	RHOQ-AS1	-8.93926	chr2:46511846-46617057	TKS4_WT	TKS4_WT_T	31.2442	28.4512	-0.135099	31.2442	28.4512	-0.135099	0	1	0	1	lncRNA	chr2	46568256-46580238	-	ENSG00000250116.2
XLOC_052792	XLOC_052792	RHPN1-AS1	-41.9336	chr8:143366622-143368635	TKS4_WT	TKS4_WT_T	1308.28	759.671	-0.784222	1308.28	759.671	-0.784225	-0.523903	0.45235	0.344525	0.999503	lncRNA	chr8	143366631-143368548	-	ENSG00000254389.3
XLOC_031837	XLOC_031837	RIPOR3-AS1	-99.6222	chr20:50586107-50692004	TKS4_WT	TKS4_WT_T	26.468	0		26.468	0.1	-8.04811	0	1	0	1	lncRNA	chr20	50645471-50662275	+	ENSG00000234693.1
XLOC_010993	XLOC_010993	RMST	-99.84	chr12:97462775-97565015	TKS4_WT	TKS4_WT_T	62.4884	0		62.4884	0.1	-9.28744	0	1	0	1	lncRNA	chr12	97430884-97598415	+	ENSG00000255794.10
XLOC_027668	XLOC_027668	RN7SL832P	79.8942	chr2:10690009-10692096	TKS4_WT	TKS4_WT_T	182.689	328.647	0.847149	182.689	328.647	0.847149	0.403041	0.6068	0.216954	0.999503	lncRNA	chr2	10690344-10692099	+	ENSG00000243819.4
XLOC_021533	XLOC_021533	RNF157-AS1	-99.84	chr17:76136332-76240493	TKS4_WT	TKS4_WT_T	62.4884	0		62.4884	0.1	-9.28744	0	1	0	1	lncRNA	chr17	76138432-76154650	+	ENSG00000267128.2
XLOC_002578	XLOC_002578	RNF207-AS1	139.801	chr1:6200491-6235964	TKS4_WT	TKS4_WT_T	93.7326	224.772	1.26184	93.7326	224.772	1.26184	0.0742036	0.63655	0.196167	0.999503	lncRNA	chr1	6204840-6205780	-	ENSG00000226944.1
XLOC_022789	XLOC_022789	RNF213-AS1	-68.2685	chr17:80260819-80438086	TKS4_WT	TKS4_WT_T	798.02	253.224	-1.65601	798.02	253.224	-1.65601	-0.0853761	0.39345	0.40511	0.999503	lncRNA	chr17	80351828-80415168	-	ENSG00000263069.6
XLOC_048048	XLOC_048048	RNF216P1	-18.2813	chr7:4973984-4998169	TKS4_WT	TKS4_WT_T	21006.7	17166.4	-0.291259	21006.7	17166.4	-0.291262	-0.279374	0.7037	0.152612	0.999503	lncRNA	chr7	4973988-5040675	+	ENSG00000196204.12
XLOC_045556	XLOC_045556	RNF217-AS1	-46.2672	chr6:124908242-125092634	TKS4_WT	TKS4_WT_T	209.157	112.386	-0.896122	209.157	112.386	-0.896124	-0.053985	0.68585	0.163771	0.999503	lncRNA	chr6	124644434-124963165	-	ENSG00000236548.3
XLOC_050563	XLOC_050563	RNF32-AS1	-62.3563	chr7:156472098-156893183	TKS4_WT	TKS4_WT_T	7970.46	3000.38	-1.40952	7970.46	3000.38	-1.40952	-0.275834	0.53045	0.275356	0.999503	lncRNA	chr7	156654185-156659582	-	ENSG00000224903.2
XLOC_021353	XLOC_021353	RNFT1-DT	287.019	chr17:59952239-60019052	TKS4_WT	TKS4_WT_T	105.872	409.745	1.9524	105.872	409.745	1.95241	0.37094	0.4791	0.319574	0.999503	lncRNA	chr17	59964832-59996972	+	ENSG00000267302.5
XLOC_002196	XLOC_002196	RNU6ATAC35P	14.6063	chr1:220824270-220826063	TKS4_WT	TKS4_WT_T	418.314	479.414	0.196687	418.314	479.414	0.196686	0.0981672	0.8962	0.0475951	0.999503	lncRNA	chr1	220825620-220826063	+	ENSG00000221571.3
XLOC_041641	XLOC_041641	ROPN1L-AS1	26932.6	chr5:10440734-10441851	TKS4_WT	TKS4_WT_T	0	27.0326		0.1	27.0326	8.07856	0	1	0	1	lncRNA	chr5	10441290-10441792	-	ENSG00000250600.1
XLOC_016723	XLOC_016723	RORA-AS1	-24.9036	chr15:60479177-61229302	TKS4_WT	TKS4_WT_T	615.73	462.391	-0.413183	615.73	462.391	-0.413185	-0.296409	0.84695	0.0721422	0.999503	lncRNA	chr15	60479152-60630637	+	ENSG00000245534.7
XLOC_039708	XLOC_039708	RPL34-DT	-7.85205	chr4:108538189-108620457	TKS4_WT	TKS4_WT_T	478.614	441.033	-0.117974	478.614	441.033	-0.117976	-0.0756021	0.9112	0.0403863	0.999503	lncRNA	chr4	108538190-108620460	-	ENSG00000234492.5
XLOC_031080	XLOC_031080	RPL37A-DT	-34.9681	chr2:216483896-216504086	TKS4_WT	TKS4_WT_T	896.928	583.289	-0.62078	896.928	583.289	-0.620781	-0.0129918	0.773	0.111821	0.999503	lncRNA	chr2	216479030-216498770	-	ENSG00000232485.4
XLOC_006178	XLOC_006178	RPP38-DT	8.6648	chr10:15095384-15104257	TKS4_WT	TKS4_WT_T	382.294	415.419	0.119886	382.294	415.419	0.119885	0.0188067	0.9493	0.0225965	0.999503	lncRNA	chr10	15095385-15097319	-	ENSG00000176236.6
XLOC_045850	XLOC_045850	RPS6KA2-IT1	-99.6799	chr6:166409363-166862525	TKS4_WT	TKS4_WT_T	31.2442	0		31.2442	0.1	-8.28744	0	1	0	1	lncRNA	chr6	166460663-166465383	-	ENSG00000232082.1
XLOC_018770	XLOC_018770	RRN3P2	45.3188	chr16:29074841-29116718	TKS4_WT	TKS4_WT_T	1589.87	2310.38	0.539218	1589.87	2310.38	0.539221	0.402175	0.54355	0.26476	0.999503	lncRNA	chr16	29074976-29116718	+	ENSG00000103472.10
XLOC_018600	XLOC_018600	RSL1D1-DT	2.1278	chr16:11851608-11916654	TKS4_WT	TKS4_WT_T	403.986	412.582	0.0303769	403.986	412.582	0.0303756	0.00150131	0.96575	0.0151353	0.999503	lncRNA	chr16	11851649-11895611	+	ENSG00000263307.1
XLOC_003506	XLOC_003506	RTCA-AS1	292.221	chr1:100264741-100266174	TKS4_WT	TKS4_WT_T	163.584	641.61	1.97166	163.584	641.61	1.97166	1.0152	0.14685	0.833126	0.999503	lncRNA	chr1	100251528-100266179	-	ENSG00000224616.4
XLOC_042763	XLOC_042763	RUFY1-AS1	-3.86123	chr5:179522456-179653239	TKS4_WT	TKS4_WT_T	57.7122	55.4838	-0.0568107	57.7122	55.4838	-0.0568097	-0.000959936	0.82865	0.0816289	0.999503	lncRNA	chr5	179595904-179603741	-	ENSG00000244945.1
XLOC_022353	XLOC_022353	RUNDC3A-AS1	22.6396	chr17:44299573-44308431	TKS4_WT	TKS4_WT_T	1295.74	1589.09	0.294426	1295.74	1589.09	0.294425	0.202446	0.77295	0.111849	0.999503	lncRNA	chr17	44299574-44315315	-	ENSG00000267750.6
XLOC_000361	XLOC_000361	RUNX3-AS1	19.9089	chr1:24899510-24965158	TKS4_WT	TKS4_WT_T	1016.73	1219.15	0.261934	1016.73	1219.15	0.261939	0.0488317	0.85565	0.0677038	0.999503	lncRNA	chr1	24961345-24963097	+	ENSG00000229162.1
XLOC_003988	XLOC_003988	RUSC1-AS1	-36.8011	chr1:155308800-155331118	TKS4_WT	TKS4_WT_T	1728.78	1092.57	-0.662024	1728.78	1092.57	-0.662029	-0.0788219	0.5726	0.242149	0.999503	lncRNA	chr1	155316863-155324176	-	ENSG00000225855.7
XLOC_035658	XLOC_035658	RUVBL1-AS1	-8.93926	chr3:128052436-128426193	TKS4_WT	TKS4_WT_T	31.2442	28.4512	-0.135099	31.2442	28.4512	-0.135099	0	1	0	1	lncRNA	chr3	128075810-128079056	+	ENSG00000239608.1
XLOC_016803	XLOC_016803	SALRNA2	53965.2	chr15:70635248-70637314	TKS4_WT	TKS4_WT_T	0	54.0652		0.1	54.0652	9.07856	0	1	0	1	lncRNA	chr15	70635249-70637314	+	ENSG00000280515.1
XLOC_016802	XLOC_016802	SALRNA3	28351.2	chr15:70615546-70616567	TKS4_WT	TKS4_WT_T	0	28.4512		0.1	28.4512	8.15235	0	1	0	1	lncRNA	chr15	70615547-70616567	+	ENSG00000281264.1
XLOC_035281	XLOC_035281	SAMMSON	26932.6	chr3:69999743-70015301	TKS4_WT	TKS4_WT_T	0	27.0326		0.1	27.0326	8.07856	0	1	0	1	lncRNA	chr3	69999550-70518064	+	ENSG00000240405.7
XLOC_040083	XLOC_040083	SAP30-DT	153.035	chr4:173363779-173370689	TKS4_WT	TKS4_WT_T	399.209	1010.14	1.33933	399.209	1010.14	1.33934	0.865938	0.27005	0.568556	0.999503	lncRNA	chr4	173349543-173370721	-	ENSG00000272870.4
XLOC_042578	XLOC_042578	SAP30L-AS1	-27.013	chr5:154190732-154445822	TKS4_WT	TKS4_WT_T	463.887	338.577	-0.454288	463.887	338.577	-0.454289	-0.0356545	0.858	0.0665127	0.999503	lncRNA	chr5	154325568-154445850	-	ENSG00000245275.8
XLOC_044904	XLOC_044904	SAPCD1-AS1,VWA7	68.1751	chr6:31739947-31777331	TKS4_WT	TKS4_WT_T	5402.06	9084.92	0.749963	5402.06	9084.92	0.749964	0.360762	0.52275	0.281706	0.999503	lncRNA,protein_coding
XLOC_034849	XLOC_034849	SATB1-AS1	26932.6	chr3:18345376-18530114	TKS4_WT	TKS4_WT_T	0	27.0326		0.1	27.0326	8.07856	0	1	0	1	lncRNA	chr3	18445024-18923280	+	ENSG00000228956.9
XLOC_029026	XLOC_029026	SATB2-AS1	29.7806	chr2:199269499-199472758	TKS4_WT	TKS4_WT_T	62.4884	81.0978	0.376075	62.4884	81.0978	0.376074	0	1	0	1	lncRNA	chr2	199457697-199476935	+	ENSG00000225953.4
XLOC_007317	XLOC_007317	SBF2-AS1	-36.8714	chr11:9754769-10294219	TKS4_WT	TKS4_WT_T	5609.23	3541.03	-0.663633	5609.23	3541.03	-0.663634	-0.217416	0.80715	0.0930457	0.999503	lncRNA	chr11	9758268-9811335	+	ENSG00000246273.8
XLOC_011241	XLOC_011241	SBNO1-AS1	206.756	chr12:123364947-123365804	TKS4_WT	TKS4_WT_T	168.361	516.457	1.61709	168.361	516.457	1.61709	0.733436	0.26645	0.574384	0.999503	lncRNA	chr12	123363868-123366113	+	ENSG00000256092.3
XLOC_036691	XLOC_036691	SCAANT1	28351.2	chr3:63816945-64003462	TKS4_WT	TKS4_WT_T	0	28.4512		0.1	28.4512	8.15235	0	1	0	1	lncRNA	chr3	63911518-63911772	-	ENSG00000280620.1
XLOC_042053	XLOC_042053	SCAMP1-AS1	-11.4508	chr5:78358763-78480739	TKS4_WT	TKS4_WT_T	2869.49	2540.91	-0.175453	2869.49	2540.91	-0.175449	-0.0345614	0.9313	0.0309104	0.999503	lncRNA	chr5	78342338-78360507	-	ENSG00000245556.4
XLOC_023514	XLOC_023514	SCARNA17,SNHG22	-30.3893	chr18:49814022-50195147	TKS4_WT	TKS4_WT_T	3384.32	2355.85	-0.522617	3384.32	2355.85	-0.522618	-0.134096	0.84615	0.0725526	0.999503	scaRNA,lncRNA
XLOC_008177	XLOC_008177	SCARNA9	-88.3568	chr11:93661681-93741495	TKS4_WT	TKS4_WT_T	2199.23	256.061	-3.10244	2199.23	256.061	-3.10244	-0.631212	0.4827	0.316323	0.999503	lncRNA	chr11	93721513-93721865	+	ENSG00000254911.3
XLOC_022771	XLOC_022771	SCAT1	24.348	chr17:78617383-78632057	TKS4_WT	TKS4_WT_T	1344.3	1671.61	0.314383	1344.3	1671.61	0.314383	0.24927	0.73895	0.131385	0.999503	lncRNA	chr17	78605233-78632155	-	ENSG00000267123.7
XLOC_043774	XLOC_043774	SCAT8	313.323	chr6:63635801-65707226	TKS4_WT	TKS4_WT_T	173.137	715.615	2.04727	173.137	715.615	2.04727	0.0896391	0.2672	0.573164	0.999503	lncRNA	chr6	63805852-63822699	+	ENSG00000236345.2
XLOC_026012	XLOC_026012	SCGB1B2P,SCGB2B2,ZNF807P	-50.0643	chr19:34541691-34677159	TKS4_WT	TKS4_WT_T	2433.07	1214.97	-1.00186	2433.07	1214.97	-1.00186	-0.710445	0.16625	0.779238	0.999503	lncRNA,protein_coding,unprocessed_pseudogene
XLOC_045094	XLOC_045094	SCIRT	-3.09452	chr6:43995722-44074652	TKS4_WT	TKS4_WT_T	716.427	694.257	-0.0453514	716.427	694.257	-0.0453499	-0.00871823	0.97105	0.0127584	0.999503	lncRNA	chr6	43931572-44074655	-	ENSG00000237686.8
XLOC_039889	XLOC_039889	SCOC-AS1	-70.1949	chr4:140257307-140385728	TKS4_WT	TKS4_WT_T	649.163	193.484	-1.74637	649.163	193.484	-1.74637	-0.141711	0.39505	0.403348	0.999503	lncRNA	chr4	140283724-140373406	-	ENSG00000196951.12
XLOC_028534	XLOC_028534	SCTR-AS1	-99.84	chr2:119439842-119524483	TKS4_WT	TKS4_WT_T	62.4884	0		62.4884	0.1	-9.28744	0	1	0	1	lncRNA	chr2	119476428-119487346	+	ENSG00000231013.2
XLOC_033845	XLOC_033845	SCUBE1-AS1	-99.6799	chr22:43197279-43343372	TKS4_WT	TKS4_WT_T	31.2442	0		31.2442	0.1	-8.28744	0	1	0	1	lncRNA	chr22	43275955-43283830	+	ENSG00000203527.2
XLOC_033844	XLOC_033844	SCUBE1-AS2	-99.6799	chr22:43197279-43343372	TKS4_WT	TKS4_WT_T	31.2442	0		31.2442	0.1	-8.28744	0	1	0	1	lncRNA	chr22	43212674-43213661	+	ENSG00000236272.1
XLOC_031350	XLOC_031350	SDCBP2-AS1	-64.7288	chr20:1309908-1393172	TKS4_WT	TKS4_WT_T	2976.76	1049.94	-1.50344	2976.76	1049.94	-1.50344	-0.151146	0.3365	0.473015	0.999503	lncRNA	chr20	1325400-1378735	+	ENSG00000234684.8
XLOC_049379	XLOC_049379	SDK1-AS1	26932.6	chr7:3244014-4269000	TKS4_WT	TKS4_WT_T	0	27.0326		0.1	27.0326	8.07856	0	1	0	1	lncRNA	chr7	3264032-3302452	-	ENSG00000236708.1
XLOC_021553	XLOC_021553	SEC14L1,SNHG20	-33.1356	chr17:77088642-77217101	TKS4_WT	TKS4_WT_T	85565.7	57213	-0.58069	85565.7	57213	-0.58069	-0.620124	0.43255	0.363964	0.999503	protein_coding,lncRNA
XLOC_014354	XLOC_014354	SEC23A-AS1	337.144	chr14:39031918-39103812	TKS4_WT	TKS4_WT_T	31.2442	136.582	2.1281	31.2442	136.582	2.12811	0.114853	0.4628	0.334607	0.999503	lncRNA	chr14	39103140-39103812	+	ENSG00000258651.1
XLOC_039713	XLOC_039713	SEC24B-AS1	-48.5937	chr4:109429962-109540896	TKS4_WT	TKS4_WT_T	440.006	226.191	-0.959982	440.006	226.191	-0.959982	-0.0737676	0.6979	0.156207	0.999503	lncRNA	chr4	109347475-109433817	-	ENSG00000247950.8
XLOC_039569	XLOC_039569	SEC31A,THAP9-AS1	4.38368	chr4:82818508-82920283	TKS4_WT	TKS4_WT_T	149783	156349	0.0618976	149783	156349	0.0618961	0.0600604	0.9428	0.0255804	0.999503	protein_coding,lncRNA
XLOC_036571	XLOC_036571	SEMA3F-AS1	355.304	chr3:50088918-50189075	TKS4_WT	TKS4_WT_T	31.2442	142.256	2.18683	31.2442	142.256	2.18683	0	1	0	1	lncRNA	chr3	50116022-50156085	-	ENSG00000235016.1
XLOC_041014	XLOC_041014	SEMA6A-AS1	52.8308	chr5:116443554-116611200	TKS4_WT	TKS4_WT_T	403.986	617.415	0.611936	403.986	617.415	0.611935	0.121261	0.78705	0.103998	0.999503	lncRNA	chr5	116447547-116508276	+	ENSG00000248445.5
XLOC_041016	XLOC_041016	SEMA6A-AS2	-26.7272	chr5:116443554-116611200	TKS4_WT	TKS4_WT_T	151.445	110.968	-0.448654	151.445	110.968	-0.44865	-0.0455905	0.8148	0.088949	0.999503	lncRNA	chr5	116574482-116611200	+	ENSG00000249167.2
XLOC_038025	XLOC_038025	SEPSECS-AS1	-59.9536	chr4:25160671-25233864	TKS4_WT	TKS4_WT_T	550.654	220.517	-1.32026	550.654	220.517	-1.32026	-0.632616	0.4229	0.373762	0.999503	lncRNA	chr4	25160641-25201440	+	ENSG00000281501.1
XLOC_041561	XLOC_041561	SEPTIN14P5	-99.6222	chr5:181333740-181336324	TKS4_WT	TKS4_WT_T	26.468	0		26.468	0.1	-8.04811		0.1242	0.905878	0.999503	lncRNA	chr5	181329241-181342213	+	ENSG00000250765.6
XLOC_049601	XLOC_049601	SEPTIN7-DT	53.1994	chr7:35754963-35800625	TKS4_WT	TKS4_WT_T	52.9361	81.0978	0.615411	52.9361	81.0978	0.615411	0	1	0	1	lncRNA	chr7	35751856-35800949	-	ENSG00000228878.9
XLOC_022754	XLOC_022754	SEPTIN9-DT	-54.4696	chr17:77253773-77500596	TKS4_WT	TKS4_WT_T	62.4884	28.4512	-1.1351	62.4884	28.4512	-1.1351	0	1	0	1	lncRNA	chr17	77257737-77281897	-	ENSG00000263718.2
XLOC_044477	XLOC_044477	SERPINB9P1	24.0737	chr6:2854656-2876510	TKS4_WT	TKS4_WT_T	249.953	310.126	0.311195	249.953	310.126	0.311198	0.218322	0.8384	0.0765487	0.999503	lncRNA	chr6	2851230-2881407	-	ENSG00000230438.8
XLOC_024957	XLOC_024957	SERTAD3-AS1	-8.93926	chr19:40440840-40445263	TKS4_WT	TKS4_WT_T	62.4884	56.9024	-0.135099	62.4884	56.9024	-0.135099	0	1	0	1	lncRNA	chr19	40443436-40444087	+	ENSG00000268366.1
XLOC_004546	XLOC_004546	SERTAD4-AS1	-99.9766	chr1:210231455-210246863	TKS4_WT	TKS4_WT_T	428.265	0		428.265	0.1	-12.0643		0.2378	0.623788	0.999503	lncRNA	chr1	210231456-210234047	-	ENSG00000203706.8
XLOC_006136	XLOC_006136	SFTA1P	104.267	chr10:10462514-11344674	TKS4_WT	TKS4_WT_T	79.4041	162.196	1.03045	79.4041	162.196	1.03045	0	1	0	1	lncRNA	chr10	10784437-10795047	-	ENSG00000225383.8
XLOC_005372	XLOC_005372	SGMS1-AS1	-26.849	chr10:50624950-50631636	TKS4_WT	TKS4_WT_T	1291.36	944.643	-0.451051	1291.36	944.643	-0.45105	-0.308186	0.6736	0.171598	0.999503	lncRNA	chr10	50623466-50641451	+	ENSG00000226200.7
XLOC_034860	XLOC_034860	SGO1-AS1	-99.6799	chr3:20160592-20226868	TKS4_WT	TKS4_WT_T	31.2442	0		31.2442	0.1	-8.28744	0	1	0	1	lncRNA	chr3	20174244-21145967	+	ENSG00000231304.2
XLOC_034319	XLOC_034319	SGSM3-AS1	264.244	chr22:40346499-40636719	TKS4_WT	TKS4_WT_T	31.2442	113.805	1.8649	31.2442	113.805	1.8649	0	1	0	1	lncRNA	chr22	40372664-40388290	-	ENSG00000229999.6
XLOC_034830	XLOC_034830	SH3BP5-AS1	-60.8827	chr3:15254183-15341380	TKS4_WT	TKS4_WT_T	7924.88	3100	-1.35412	7924.88	3100	-1.35412	-0.654558	0.4335	0.363011	0.999503	lncRNA	chr3	15254184-15264515	+	ENSG00000224660.2
XLOC_005795	XLOC_005795	SH3PXD2A-AS1	-10.4261	chr10:103594026-103855576	TKS4_WT	TKS4_WT_T	336.721	301.614	-0.158849	336.721	301.614	-0.15885	-0.0186667	0.9495	0.022505	0.999503	lncRNA	chr10	103745966-103755423	+	ENSG00000280693.2
XLOC_041258	XLOC_041258	SH3TC2-DT	-84.6439	chr5:149063316-149109787	TKS4_WT	TKS4_WT_T	185.276	28.4512	-2.70312	185.276	28.4512	-2.70311	0	1	0	1	lncRNA	chr5	149063254-149129578	+	ENSG00000250072.7
XLOC_007967	XLOC_007967	SHANK2-AS3	-99.936	chr11:70467853-71252724	TKS4_WT	TKS4_WT_T	156.221	0		156.221	0.1	-10.6094	0	1	0	1	lncRNA	chr11	70862790-70865115	+	ENSG00000171671.6
XLOC_039519	XLOC_039519	SHROOM3-AS1	85253.6	chr4:76435228-76802573	TKS4_WT	TKS4_WT_T	0	85.3536		0.1	85.3536	9.73731	0	1	0	1	lncRNA	chr4	76708853-76802426	-	ENSG00000233860.2
XLOC_025219	XLOC_025219	SIGLEC10-AS1	13.826	chr19:51379908-51418197	TKS4_WT	TKS4_WT_T	374.93	426.768	0.186829	374.93	426.768	0.186831	0	1	0	1	lncRNA	chr19	51415724-51417425	+	ENSG00000255441.1
XLOC_029781	XLOC_029781	SIX3-AS1	46.2022	chr2:44940153-44946071	TKS4_WT	TKS4_WT_T	132.34	193.484	0.547962	132.34	193.484	0.547965	0.212739	0.77595	0.110166	0.999503	lncRNA	chr2	44940153-44941916	-	ENSG00000236502.2
XLOC_032458	XLOC_032458	SLC12A5-AS1	-50.7016	chr20:46008907-46060150	TKS4_WT	TKS4_WT_T	57.7122	28.4512	-1.02039	57.7122	28.4512	-1.02039	-0.292195	0.60205	0.220367	0.999503	lncRNA	chr20	46013500-46022073	-	ENSG00000204044.6
XLOC_023983	XLOC_023983	SLC14A2-AS1	-99.8933	chr18:45158411-45782836	TKS4_WT	TKS4_WT_T	93.7326	0		93.7326	0.1	-9.87241	0	1	0	1	lncRNA	chr18	45423764-45483218	-	ENSG00000267097.1
XLOC_001210	XLOC_001210	SLC16A1-AS1	-21.1203	chr1:112956414-112964072	TKS4_WT	TKS4_WT_T	2445.61	1929.09	-0.342274	2445.61	1929.09	-0.342274	-0.271207	0.6775	0.169091	0.999503	lncRNA	chr1	112956415-113047055	+	ENSG00000226419.8
XLOC_014344	XLOC_014344	SLC25A21-AS1	71.7626	chr14:36649196-37173794	TKS4_WT	TKS4_WT_T	971.556	1668.77	0.780416	971.556	1668.77	0.780416	0.291337	0.7187	0.143452	0.999503	lncRNA	chr14	37171888-37173811	+	ENSG00000258708.1
XLOC_055254	XLOC_055254	SLC25A25-AS1	-41.6115	chr9:128111170-128118734	TKS4_WT	TKS4_WT_T	5394.3	3149.65	-0.776244	5394.3	3149.65	-0.776244	-0.564198	0.4471	0.349595	0.999503	lncRNA	chr9	128108581-128118693	-	ENSG00000234771.3
XLOC_057396	XLOC_057396	SLC25A5-AS1	39.0529	chrX:119466032-119471396	TKS4_WT	TKS4_WT_T	1029.27	1431.23	0.475637	1029.27	1431.23	0.475634	0.0344364	0.7982	0.0978883	0.999503	lncRNA	chrX	119465986-119469128	-	ENSG00000224281.5
XLOC_037951	XLOC_037951	SLC2A9-AS1	-99.934	chr4:9771124-10040270	TKS4_WT	TKS4_WT_T	151.445	0		151.445	0.1	-10.5646		0.00205	2.68825	0.375821	lncRNA	chr4	10006482-10009725	+	ENSG00000250413.1
XLOC_004795	XLOC_004795	SLC35F3-AS1	-46.2537	chr1:233904675-234324511	TKS4_WT	TKS4_WT_T	52.9361	28.4512	-0.895763	52.9361	28.4512	-0.895762	0	1	0	1	lncRNA	chr1	234268583-234272500	-	ENSG00000236244.1
XLOC_003571	XLOC_003571	SLC6A17-AS1	-10.0747	chr1:110150493-110202202	TKS4_WT	TKS4_WT_T	124.977	112.386	-0.153195	124.977	112.386	-0.1532	-0.0183528	0.8553	0.0678815	0.999503	lncRNA	chr1	110165948-110172489	-	ENSG00000227091.2
XLOC_038697	XLOC_038697	SLC7A11-AS1	82.1215	chr4:138025237-138242349	TKS4_WT	TKS4_WT_T	31.2442	56.9024	0.864901	31.2442	56.9024	0.864901	0	1	0	1	lncRNA	chr4	138057464-138178177	+	ENSG00000250033.5
XLOC_040339	XLOC_040339	SLC9A3-AS1	-16.3229	chr5:470455-524449	TKS4_WT	TKS4_WT_T	2358.04	1973.14	-0.257094	2358.04	1973.14	-0.257095	-0.0765289	0.9035	0.0440718	0.999503	lncRNA	chr5	473236-480884	+	ENSG00000225138.8
XLOC_022695	XLOC_022695	SLC9A3R1-AS1	3.83623	chr17:74670091-74769353	TKS4_WT	TKS4_WT_T	2003.01	2079.85	0.0543106	2003.01	2079.85	0.0543099	0.00734238	0.97775	0.00977218	0.999503	lncRNA	chr17	74747319-74748912	-	ENSG00000266036.1
XLOC_032604	XLOC_032604	SLCO4A1-AS1	21.4145	chr20:62642057-62690722	TKS4_WT	TKS4_WT_T	93.7326	113.805	0.279939	93.7326	113.805	0.279941	0	1	0	1	lncRNA	chr20	62663019-62666724	-	ENSG00000232803.1
XLOC_000587	XLOC_000587	SLFNL1-AS1	-50.6374	chr1:41014589-41242306	TKS4_WT	TKS4_WT_T	12274	6058.76	-1.01851	12274	6058.76	-1.01851	-0.521169	0.66815	0.175126	0.999503	lncRNA	chr1	41014590-41043890	+	ENSG00000281207.1
XLOC_018796	XLOC_018796	SLX1A,SLX1A-SULT1A3,SULT1A3	-26.7021	chr16:30193842-30206927	TKS4_WT	TKS4_WT_T	1178.13	863.545	-0.448149	1178.13	863.545	-0.448155	-0.292119	0.6616	0.179405	0.999503	protein_coding,lncRNA,protein_coding
XLOC_018775	XLOC_018775	SLX1B,SLX1B-SULT1A4,SULT1A4	-38.4255	chr16:29425410-29467578	TKS4_WT	TKS4_WT_T	177.913	109.549	-0.699594	177.913	109.549	-0.699596	-0.0608857	0.6051	0.218173	0.999503	protein_coding,lncRNA,protein_coding
XLOC_039922	XLOC_039922	SMAD1-AS1	139319	chr4:145481305-145559176	TKS4_WT	TKS4_WT_T	0	139.419		0.1	139.419	10.4452		0.165	0.782516	0.999503	lncRNA	chr4	145514615-145517118	-	ENSG00000250902.1
XLOC_042420	XLOC_042420	SMAD5-AS1	114.986	chr5:136129512-136182733	TKS4_WT	TKS4_WT_T	26.468	56.9024	1.10424	26.468	56.9024	1.10424	0	1	0	1	lncRNA	chr5	136129507-136134890	-	ENSG00000164621.5
XLOC_039906	XLOC_039906	SMARCA5-AS1	-22.0467	chr4:143513471-143557486	TKS4_WT	TKS4_WT_T	1454.55	1133.87	-0.359313	1454.55	1133.87	-0.359318	-0.0288429	0.84835	0.0714249	0.999503	lncRNA	chr4	143513472-143514635	-	ENSG00000245112.2
XLOC_055024	XLOC_055024	SMC2-DT	-23.7947	chr9:104080023-104092474	TKS4_WT	TKS4_WT_T	141.893	108.13	-0.392026	141.893	108.13	-0.392037	-0.238755	0.4583	0.33885	0.999503	lncRNA	chr9	104077308-104093073	-	ENSG00000270332.3
XLOC_054751	XLOC_054751	SMC5-DT	63.17	chr9:70043580-70258874	TKS4_WT	TKS4_WT_T	377.518	615.996	0.706377	377.518	615.996	0.706376	0.281464	0.5997	0.222066	0.999503	lncRNA	chr9	70193997-70258866	-	ENSG00000268364.3
XLOC_021908	XLOC_021908	SMCR2	-99.6799	chr17:17674025-17677688	TKS4_WT	TKS4_WT_T	31.2442	0		31.2442	0.1	-8.28744	0	1	0	1	lncRNA	chr17	17674026-17677688	-	ENSG00000223979.2
XLOC_021910	XLOC_021910	SMCR5	255.164	chr17:17681375-17837017	TKS4_WT	TKS4_WT_T	31.2442	110.968	1.82848	31.2442	110.968	1.82848	0.0665285	0.4773	0.321209	0.999503	lncRNA	chr17	17776686-17779529	-	ENSG00000226746.2
XLOC_004333	XLOC_004333	SMG7-AS1	158.334	chr1:183433889-183471982	TKS4_WT	TKS4_WT_T	437.817	1131.03	1.36924	437.817	1131.03	1.36924	0.737431	0.31105	0.50717	0.999503	lncRNA	chr1	183460874-183472896	-	ENSG00000232860.9
XLOC_012953	XLOC_012953	SMIM2-AS1	0.64471	chr13:44106090-44161257	TKS4_WT	TKS4_WT_T	137.116	138	0.0092694	137.116	138	0.00927134	0.00381403	0.91585	0.0381757	0.999503	lncRNA	chr13	44110451-44240517	+	ENSG00000227258.7
XLOC_002413	XLOC_002413	SMYD3-AS1	173.182	chr1:245749341-246507279	TKS4_WT	TKS4_WT_T	31.2442	85.3536	1.44986	31.2442	85.3536	1.44986	0	1	0	1	lncRNA	chr1	246108626-246113866	+	ENSG00000226876.3
XLOC_019317	XLOC_019317	SNAI3-AS1	-1.48831	chr16:88663372-88687186	TKS4_WT	TKS4_WT_T	1721.42	1695.8	-0.021628	1721.42	1695.8	-0.0216331	-0.0119775	0.98725	0.00557286	0.999503	lncRNA	chr16	88663298-88687282	+	ENSG00000260630.8
XLOC_048989	XLOC_048989	SND1-IT1	-41.8977	chr7:127652144-128092593	TKS4_WT	TKS4_WT_T	6378.39	3705.99	-0.783336	6378.39	3705.99	-0.783333	-0.128267	0.6771	0.169347	0.999503	lncRNA	chr7	127997597-128000077	+	ENSG00000279078.1
XLOC_031311	XLOC_031311	SNED1-AS1	-99.84	chr2:240997409-241102332	TKS4_WT	TKS4_WT_T	62.4884	0		62.4884	0.1	-9.28744	0	1	0	1	lncRNA	chr2	241015599-241064116	-	ENSG00000225521.1
XLOC_009244	XLOC_009244	SNHG1,SNORD25	-0.203615	chr11:62851977-62855885	TKS4_WT	TKS4_WT_T	188591	188207	-0.00293788	188591	188207	-0.00294054	-0.00290343	0.9963	0.00160987	0.999503	lncRNA,snoRNA
XLOC_015716	XLOC_015716	SNHG10	6.81907	chr14:95532911-95534872	TKS4_WT	TKS4_WT_T	49077.1	52423.7	0.0951685	49077.1	52423.7	0.0951692	0.0983691	0.88405	0.0535232	0.999503	lncRNA	chr14	95521943-95534889	-	ENSG00000247092.8
XLOC_031688	XLOC_031688	SNHG11	-11.8751	chr20:38446653-38450921	TKS4_WT	TKS4_WT_T	5404.85	4763.02	-0.18238	5404.85	4763.02	-0.182378	-0.15853	0.81475	0.0889756	0.999503	lncRNA	chr20	38446343-38450940	+	ENSG00000174365.21
XLOC_002876	XLOC_002876	SNHG12,SNORA44,SNORA61	-17.9845	chr1:28553084-28582983	TKS4_WT	TKS4_WT_T	54309.4	44542.1	-0.286034	54309.4	44542.1	-0.286032	-0.251378	0.73175	0.135637	0.999503	lncRNA,snoRNA,snoRNA
XLOC_049678	XLOC_049678	SNHG15	31.65	chr7:44983022-44986696	TKS4_WT	TKS4_WT_T	28304.9	37263.4	0.39671	28304.9	37263.4	0.396707	0.374157	0.6231	0.205442	0.999503	lncRNA	chr7	44983019-44986961	-	ENSG00000232956.10
XLOC_021540	XLOC_021540	SNHG16	11.3504	chr17:76557763-76565348	TKS4_WT	TKS4_WT_T	583265	649468	0.155107	583265	649468	0.155107	0.132919	0.84295	0.0741982	0.999503	lncRNA	chr17	76557733-76565357	+	ENSG00000163597.16
XLOC_032374	XLOC_032374	SNHG17	4.28042	chr20:38420587-38435377	TKS4_WT	TKS4_WT_T	11706.8	12207.9	0.0604593	11706.8	12207.9	0.0604683	0.0607633	0.93595	0.0287474	0.999503	lncRNA	chr20	38419638-38435409	-	ENSG00000196756.14
XLOC_019430	XLOC_019430	SNHG19	89.0114	chr16:2154781-2155358	TKS4_WT	TKS4_WT_T	7301.2	13800.1	0.918474	7301.2	13800.1	0.918473	0.835494	0.2312	0.636012	0.999503	lncRNA	chr16	2154792-2155405	-	ENSG00000260260.2
XLOC_016940	XLOC_016940	SNHG21	22.5417	chr15:82750563-82807701	TKS4_WT	TKS4_WT_T	2794.47	3424.39	0.293274	2794.47	3424.39	0.293272	0.262778	0.7284	0.13763	0.999503	lncRNA	chr15	82750564-82757206	+	ENSG00000250988.7
XLOC_048166	XLOC_048166	SNHG26	-11.4442	chr7:22854239-22861436	TKS4_WT	TKS4_WT_T	2342.32	2074.26	-0.175343	2342.32	2074.26	-0.175341	-0.14562	0.8207	0.0858156	0.999503	lncRNA	chr7	22854126-22872952	+	ENSG00000228649.10
XLOC_004083	XLOC_004083	SNHG28,VSIG8	319.911	chr1:159826688-159867685	TKS4_WT	TKS4_WT_T	492.942	2069.92	2.07009	492.942	2069.92	2.07009	0.713727	0.0926	1.03339	0.999503	lncRNA,protein_coding
XLOC_020725	XLOC_020725	SNHG29,SNORD49B	55.1133	chr17:16438986-16492193	TKS4_WT	TKS4_WT_T	435236	675109	0.633322	435236	675109	0.633323	0.554762	0.39955	0.398429	0.999503	lncRNA,snoRNA
XLOC_020981	XLOC_020981	SNHG30	61.4713	chr17:35568113-35574313	TKS4_WT	TKS4_WT_T	5193.11	8385.38	0.691279	5193.11	8385.38	0.691277	0.59826	0.38945	0.409548	0.999503	lncRNA	chr17	35568050-35574900	+	ENSG00000267321.4
XLOC_029159	XLOC_029159	SNHG31	-52.8867	chr2:214810228-215138626	TKS4_WT	TKS4_WT_T	1630.67	768.262	-1.08579	1630.67	768.262	-1.08579	-0.566261	0.4935	0.306713	0.999503	lncRNA	chr2	214810181-214963575	+	ENSG00000229267.3
XLOC_043465	XLOC_043465	SNHG32	32.202	chr6:31834915-31839761	TKS4_WT	TKS4_WT_T	50832.3	67201.3	0.402742	50832.3	67201.3	0.402744	0.402218	0.58385	0.233699	0.999503	lncRNA	chr6	31834608-31839766	+	ENSG00000204387.14
XLOC_045336	XLOC_045336	SNHG5	21.7464	chr6:85677006-85678733	TKS4_WT	TKS4_WT_T	16292.8	19835.9	0.283884	16292.8	19835.9	0.283879	0.284693	0.67955	0.167779	0.999503	lncRNA	chr6	85650491-85678932	-	ENSG00000203875.13
XLOC_052280	XLOC_052280	SNHG6	-28.453	chr8:66870756-66926436	TKS4_WT	TKS4_WT_T	67892.9	48575.3	-0.483038	67892.9	48575.3	-0.483038	-0.419325	0.54115	0.266682	0.999503	lncRNA	chr8	66920561-66926398	-	ENSG00000245910.9
XLOC_055370	XLOC_055370	SNHG7,SNORA17A,SNORA17B	-46.0712	chr9:136712571-136728184	TKS4_WT	TKS4_WT_T	90580.4	48848.9	-0.890872	90580.4	48848.9	-0.890873	-0.865802	0.23425	0.63032	0.999503	lncRNA,snoRNA,snoRNA
XLOC_038604	XLOC_038604	SNHG8	60.9948	chr4:118278761-118279823	TKS4_WT	TKS4_WT_T	46418.4	74731.2	0.687016	46418.4	74731.2	0.687014	0.762892	0.29815	0.525565	0.999503	lncRNA	chr4	118278705-118285316	+	ENSG00000269893.9
XLOC_018462	XLOC_018462	SNHG9	-50.0663	chr16:1964995-1965504	TKS4_WT	TKS4_WT_T	709.463	354.261	-1.00191	709.463	354.261	-1.00191	-0.567049	0.41715	0.379708	0.999503	lncRNA	chr16	1964899-1965509	+	ENSG00000255198.5
XLOC_036458	XLOC_036458	SNRK-AS1	9.85317	chr3:43286511-43351962	TKS4_WT	TKS4_WT_T	1906.29	2094.12	0.135573	1906.29	2094.12	0.135577	0.0348765	0.95105	0.0217967	0.999503	lncRNA	chr3	43346923-43352152	-	ENSG00000234617.2
XLOC_028467	XLOC_028467	SOCAR	110868	chr2:111195865-111510994	TKS4_WT	TKS4_WT_T	0	110.968		0.1	110.968	10.1159		0.13735	0.862171	0.999503	lncRNA	chr2	111491272-111570974	+	ENSG00000240350.3
XLOC_012199	XLOC_012199	SOCS2-AS1	-99.9134	chr12:93565627-93626236	TKS4_WT	TKS4_WT_T	115.424	0		115.424	0.1	-10.1727		0.1689	0.77237	0.999503	lncRNA	chr12	93542022-93571768	-	ENSG00000246985.8
XLOC_021576	XLOC_021576	SOCS3-DT	101.653	chr17:78356777-78373909	TKS4_WT	TKS4_WT_T	218.709	441.033	1.01187	218.709	441.033	1.01187	0.210675	0.67925	0.16797	0.999503	lncRNA	chr17	78360417-78373911	+	ENSG00000266970.2
XLOC_045804	XLOC_045804	SOD2,SOD2-OT1	23.6901	chr6:159669068-159789602	TKS4_WT	TKS4_WT_T	90551.3	112003	0.306725	90551.3	112003	0.30673	0.0888192	0.7647	0.116509	0.999503	protein_coding,lncRNA
XLOC_013231	XLOC_013231	SOX21-AS1	28351.2	chr13:94712715-94715945	TKS4_WT	TKS4_WT_T	0	28.4512		0.1	28.4512	8.15235	0	1	0	1	lncRNA	chr13	94703454-94803430	+	ENSG00000227640.4
XLOC_036003	XLOC_036003	SOX2-OT	53965.2	chr3:181056679-181742228	TKS4_WT	TKS4_WT_T	0	54.0652		0.1	54.0652	9.07856	0	1	0	1	lncRNA	chr3	180989762-181836880	+	ENSG00000242808.11
XLOC_022669	XLOC_022669	SOX9-AS1	40.4369	chr17:72071041-72120793	TKS4_WT	TKS4_WT_T	1165.99	1637.48	0.489928	1165.99	1637.48	0.489922	0.352039	0.61925	0.208134	0.999503	lncRNA	chr17	72067099-72237203	-	ENSG00000234899.11
XLOC_022418	XLOC_022418	SP2-AS1	115.399	chr17:47896031-47941404	TKS4_WT	TKS4_WT_T	2395.66	5160.23	1.10702	2395.66	5160.23	1.10701	0.521246	0.59855	0.2229	0.999503	lncRNA	chr17	47897330-47941410	-	ENSG00000234494.8
XLOC_022417	XLOC_022417	SP2-DT	-99.9055	chr17:47891228-47895816	TKS4_WT	TKS4_WT_T	105.872	0		105.872	0.1	-10.0481	0	1	0	1	lncRNA	chr17	47891219-47895837	-	ENSG00000264920.3
XLOC_020884	XLOC_020884	SPAG5-AS1	-83.5672	chr17:28599132-28645159	TKS4_WT	TKS4_WT_T	173.137	28.4512	-2.60535	173.137	28.4512	-2.60535	-0.0948485	0.3612	0.442252	0.999503	lncRNA	chr17	28598790-28617377	+	ENSG00000227543.5
XLOC_012795	XLOC_012795	SPATA13	10.9069	chr13:23979801-24307069	TKS4_WT	TKS4_WT_T	59513.8	66004.9	0.149348	59513.8	66004.9	0.149349	0.160206	0.8234	0.0843891	0.999503	lncRNA	chr13	23979810-24035027	+	ENSG00000228741.2
XLOC_031210	XLOC_031210	SPATA3-AS1	551.877	chr2:230984367-230996032	TKS4_WT	TKS4_WT_T	110.648	721.289	2.7046	110.648	721.289	2.7046	1.38858	0.1266	0.897566	0.999503	lncRNA	chr2	230984368-230996032	-	ENSG00000238062.6
XLOC_017975	XLOC_017975	SPATA41	563.139	chr15:100344456-100352140	TKS4_WT	TKS4_WT_T	57.7122	382.712	2.72931	57.7122	382.712	2.72931	0.860176	0.10555	0.976542	0.999503	lncRNA	chr15	100344047-100350725	-	ENSG00000189419.8
XLOC_017372	XLOC_017372	SPINT1-AS1	18.163	chr15:40835992-40858207	TKS4_WT	TKS4_WT_T	2982.33	3524.01	0.240778	2982.33	3524.01	0.240778	0.0499163	0.84265	0.0743528	0.999503	lncRNA	chr15	40835808-40844409	-	ENSG00000261183.6
XLOC_041213	XLOC_041213	SPRY4-AS1	-81.6002	chr5:142325292-142464054	TKS4_WT	TKS4_WT_T	1360.81	250.386	-2.44224	1360.81	250.386	-2.44224	-1.30526	0.1153	0.938171	0.999503	lncRNA	chr5	142325293-142672001	+	ENSG00000231185.8
XLOC_029842	XLOC_029842	SPTBN1-AS1	28351.2	chr2:54456326-54671446	TKS4_WT	TKS4_WT_T	0	28.4512		0.1	28.4512	8.15235	0	1	0	1	lncRNA	chr2	54516048-54540697	-	ENSG00000228108.1
XLOC_039374	XLOC_039374	SRD5A3-AS1	53965.2	chr4:55346227-55387503	TKS4_WT	TKS4_WT_T	0	54.0652		0.1	54.0652	9.07856	0	1	0	1	lncRNA	chr4	55363971-55395847	-	ENSG00000249700.9
XLOC_034348	XLOC_034348	SREBF2-AS1	66.0542	chr22:41800678-41915095	TKS4_WT	TKS4_WT_T	1834.25	3045.85	0.731654	1834.25	3045.85	0.731655	0.0743597	0.6724	0.172372	0.999503	lncRNA	chr22	41831215-41834665	-	ENSG00000184068.2
XLOC_048685	XLOC_048685	SRI-AS1	-86.3972	chr7:88205114-88229768	TKS4_WT	TKS4_WT_T	209.157	28.4512	-2.87803	209.157	28.4512	-2.87802	-0.334964	0.3878	0.411392	0.999503	lncRNA	chr7	88216660-88219226	+	ENSG00000254003.1
XLOC_019446	XLOC_019446	SRRM2-AS1	-31.7046	chr16:2737075-2771412	TKS4_WT	TKS4_WT_T	124.977	85.3536	-0.550136	124.977	85.3536	-0.550139	0	1	0	1	lncRNA	chr16	2737076-2752600	-	ENSG00000205913.7
XLOC_000762	XLOC_000762	SSBP3-AS1	-53.8408	chr1:54200166-54413479	TKS4_WT	TKS4_WT_T	120.201	55.4838	-1.11531	120.201	55.4838	-1.11531	-0.0313185	0.6	0.221849	0.999503	lncRNA	chr1	54236440-54239063	+	ENSG00000198711.5
XLOC_019394	XLOC_019394	SSTR5-AS1	-61.8178	chr16:1064080-1081454	TKS4_WT	TKS4_WT_T	521.599	199.158	-1.38902	521.599	199.158	-1.38903	-0.382855	0.63475	0.197397	0.999503	lncRNA	chr16	1064087-1078731	-	ENSG00000261713.7
XLOC_016914	XLOC_016914	ST20-AS1	-8.67328	chr15:79843546-79924854	TKS4_WT	TKS4_WT_T	995.436	909.099	-0.130892	995.436	909.099	-0.130891	-0.0324076	0.9427	0.0256265	0.999503	lncRNA	chr15	79922771-79926993	+	ENSG00000259642.2
XLOC_028235	XLOC_028235	ST3GAL5-AS1	56802.4	chr2:85889279-85892252	TKS4_WT	TKS4_WT_T	0	56.9024		0.1	56.9024	9.15235	0	1	0	1	lncRNA	chr2	85889151-85891136	+	ENSG00000232504.5
XLOC_036827	XLOC_036827	ST3GAL6-AS1	-66.9496	chr3:98714332-98795852	TKS4_WT	TKS4_WT_T	163.584	54.0652	-1.59726	163.584	54.0652	-1.59726	-0.302784	0.5308	0.275069	0.999503	lncRNA	chr3	98706236-98732757	-	ENSG00000239445.6
XLOC_050243	XLOC_050243	ST7-AS1	16.4197	chr7:116952445-117230176	TKS4_WT	TKS4_WT_T	1145.09	1333.11	0.219333	1145.09	1333.11	0.219335	0.0607149	0.9276	0.0326393	0.999503	lncRNA	chr7	116952446-116954334	-	ENSG00000227199.1
XLOC_048928	XLOC_048928	ST7-OT4	1.25664	chr7:116952445-117230176	TKS4_WT	TKS4_WT_T	490.355	496.517	0.0180174	490.355	496.517	0.0180165	0.00333299	0.9579	0.0186798	0.999503	lncRNA	chr7	116953899-117098806	+	ENSG00000214188.9
XLOC_023492	XLOC_023492	ST8SIA5-DT	26932.6	chr18:46667820-46795297	TKS4_WT	TKS4_WT_T	0	27.0326		0.1	27.0326	8.07856	0	1	0	1	lncRNA	chr18	46756487-46802449	+	ENSG00000270112.4
XLOC_040979	XLOC_040979	STARD4-AS1	-99.9533	chr5:111223582-112017306	TKS4_WT	TKS4_WT_T	213.933	0		213.933	0.1	-11.0629		0.12895	0.889579	0.999503	lncRNA	chr5	111510396-111739726	+	ENSG00000246859.3
XLOC_028317	XLOC_028317	STARD7-AS1	-34.4539	chr2:96184858-96242623	TKS4_WT	TKS4_WT_T	5910.13	3873.86	-0.609419	5910.13	3873.86	-0.609418	-0.0785866	0.7544	0.122398	0.999503	lncRNA	chr2	96208389-96243353	+	ENSG00000204685.8
XLOC_051295	XLOC_051295	STAU2-AS1	28351.2	chr8:73420073-73747480	TKS4_WT	TKS4_WT_T	0	28.4512		0.1	28.4512	8.15235	0	1	0	1	lncRNA	chr8	73420004-73441526	+	ENSG00000253302.1
XLOC_030429	XLOC_030429	STEAP3-AS1	6.85151	chr2:119222475-119271394	TKS4_WT	TKS4_WT_T	605.779	647.284	0.095608	605.779	647.284	0.0956073	0.0107616	0.9608	0.017367	0.999503	lncRNA	chr2	119244422-119270714	-	ENSG00000229867.2
XLOC_008636	XLOC_008636	STIM1-AS1	-99.6222	chr11:3854322-4093210	TKS4_WT	TKS4_WT_T	26.468	0		26.468	0.1	-8.04811	0	1	0	1	lncRNA	chr11	3854318-3855509	-	ENSG00000228661.1
XLOC_039236	XLOC_039236	STIM2-AS1	1211.43	chr4:26859623-26860599	TKS4_WT	TKS4_WT_T	31.2442	409.745	3.71307	31.2442	409.745	3.71307	2.41672	0.25665	0.590659	0.999503	lncRNA	chr4	26859806-26860632	-	ENSG00000240005.6
XLOC_013259	XLOC_013259	STK24-AS1	60.361	chr13:98577254-98578841	TKS4_WT	TKS4_WT_T	1491.36	2391.56	0.681317	1491.36	2391.56	0.681323	0.482639	0.5136	0.289375	0.999503	lncRNA	chr13	98577244-98578830	+	ENSG00000224418.1
XLOC_037866	XLOC_037866	STX18-AS1	-43.5265	chr4:4386531-4710938	TKS4_WT	TKS4_WT_T	2264.71	1278.96	-0.824348	2264.71	1278.96	-0.824355	-0.192481	0.7815	0.107071	0.999503	lncRNA	chr4	4542131-4787359	+	ENSG00000247708.8
XLOC_039091	XLOC_039091	STX18-IT1	-99.6222	chr4:4386531-4710938	TKS4_WT	TKS4_WT_T	26.468	0		26.468	0.1	-8.04811	0	1	0	1	lncRNA	chr4	4476121-4481700	-	ENSG00000248221.1
XLOC_045719	XLOC_045719	STXBP5-AS1	29.7806	chr6:146841387-147390476	TKS4_WT	TKS4_WT_T	62.4884	81.0978	0.376075	62.4884	81.0978	0.376074	0	1	0	1	lncRNA	chr6	146824539-147204614	-	ENSG00000233452.8
XLOC_049636	XLOC_049636	SUGCT-AS1	28351.2	chr7:40134886-40902311	TKS4_WT	TKS4_WT_T	0	28.4512		0.1	28.4512	8.15235	0	1	0	1	lncRNA	chr7	40538127-40546928	-	ENSG00000203446.2
XLOC_013723	XLOC_013723	SUGT1-DT	35.7611	chr13:52651304-52652307	TKS4_WT	TKS4_WT_T	807.971	1096.91	0.441067	807.971	1096.91	0.44107	0.313353	0.6602	0.180324	0.999503	lncRNA	chr13	52651305-52652279	-	ENSG00000273723.1
XLOC_044298	XLOC_044298	SYNE1-AS1	2.13314	chr6:151654147-152637395	TKS4_WT	TKS4_WT_T	26.468	27.0326	0.0304486	26.468	27.0326	0.0304511	0	1	0	1	lncRNA	chr6	152380546-152381564	+	ENSG00000234577.1
XLOC_044341	XLOC_044341	SYNJ2-IT1	-99.6799	chr6:157981855-158099176	TKS4_WT	TKS4_WT_T	31.2442	0		31.2442	0.1	-8.28744	0	1	0	1	lncRNA	chr6	158001107-158002383	+	ENSG00000233496.1
XLOC_003060	XLOC_003060	SZT2-AS1	276.223	chr1:43389883-43454247	TKS4_WT	TKS4_WT_T	52.9361	199.158	1.91159	52.9361	199.158	1.91159	0	1	0	1	lncRNA	chr1	43447776-43448644	-	ENSG00000229372.1
XLOC_002208	XLOC_002208	TAF1A-AS1	-22.5922	chr1:222557901-222592633	TKS4_WT	TKS4_WT_T	420.901	325.81	-0.369452	420.901	325.81	-0.36945	-0.0452719	0.85355	0.068771	0.999503	lncRNA	chr1	222589825-222593843	+	ENSG00000225265.2
XLOC_044350	XLOC_044350	TAGAP-AS1	-18.7965	chr6:158947011-159121478	TKS4_WT	TKS4_WT_T	800.608	650.122	-0.300386	800.608	650.122	-0.300386	-0.047142	0.7993	0.0972902	0.999503	lncRNA	chr6	158988178-159088114	+	ENSG00000271913.8
XLOC_037990	XLOC_037990	TAPT1-AS1	14.0847	chr4:16226662-16258187	TKS4_WT	TKS4_WT_T	463.887	529.224	0.190106	463.887	529.224	0.190105	0.10305	0.86455	0.0632099	0.999503	lncRNA	chr4	16226685-16320140	+	ENSG00000263327.6
XLOC_045623	XLOC_045623	TARID	-44.816	chr6:133240339-133889006	TKS4_WT	TKS4_WT_T	1755.65	968.838	-0.857674	1755.65	968.838	-0.857678	-0.543159	0.447	0.349692	0.999503	lncRNA	chr6	133502252-133892802	-	ENSG00000227954.7
XLOC_019178	XLOC_019178	TAT-AS1	7.49262	chr16:71565015-71577092	TKS4_WT	TKS4_WT_T	52.9361	56.9024	0.104237	52.9361	56.9024	0.104238	0	1	0	1	lncRNA	chr16	71564952-71578187	+	ENSG00000260886.2
XLOC_049551	XLOC_049551	TAX1BP1-AS1	-67.1343	chr7:27732701-27829767	TKS4_WT	TKS4_WT_T	346.273	113.805	-1.60535	346.273	113.805	-1.60535	-0.149402	0.49985	0.30116	0.999503	lncRNA	chr7	27733064-27740395	-	ENSG00000229893.2
XLOC_034428	XLOC_034428	TBC1D22A-AS1	-54.4697	chr22:46762630-47224975	TKS4_WT	TKS4_WT_T	124.977	56.9024	-1.1351	124.977	56.9024	-1.1351	0	1	0	1	lncRNA	chr22	46914092-46916042	-	ENSG00000280080.2
XLOC_028369	XLOC_028369	TBC1D8-AS1	-55.3502	chr2:101002228-101195321	TKS4_WT	TKS4_WT_T	863.495	385.549	-1.16327	863.495	385.549	-1.16327	-0.0318682	0.52665	0.278478	0.999503	lncRNA	chr2	101151660-101155412	+	ENSG00000272902.2
XLOC_028216	XLOC_028216	TCF7L1-IT1	77.5818	chr2:85133391-85310387	TKS4_WT	TKS4_WT_T	62.4884	110.968	0.828479	62.4884	110.968	0.828483	0.18368	0.70735	0.150366	0.999503	lncRNA	chr2	85186409-85187253	+	ENSG00000231134.1
XLOC_014789	XLOC_014789	TCL6	4.35604	chr14:95652096-95673452	TKS4_WT	TKS4_WT_T	182.689	190.647	0.0615128	182.689	190.647	0.0615141	0	1	0	1	lncRNA	chr14	95650498-95679833	+	ENSG00000187621.15
XLOC_043600	XLOC_043600	TDRG1	-99.6222	chr6:40378336-40379893	TKS4_WT	TKS4_WT_T	26.468	0		26.468	0.1	-8.04811	0	1	0	1	lncRNA	chr6	40334775-40387590	+	ENSG00000204091.8
XLOC_001475	XLOC_001475	TDRKH-AS1	168.642	chr1:151790748-151794402	TKS4_WT	TKS4_WT_T	31.2442	83.935	1.42568	31.2442	83.935	1.42568	0.697361	0.4604	0.336865	0.999503	lncRNA	chr1	151790804-151794403	+	ENSG00000203288.5
XLOC_037364	XLOC_037364	TERC	53.8817	chr3:169764609-169765060	TKS4_WT	TKS4_WT_T	252906	389176	0.621823	252906	389176	0.621821	0.55616	0.4393	0.357239	0.999503	lncRNA	chr3	169764520-169765060	-	ENSG00000270141.3
XLOC_011169	XLOC_011169	TESC-AS1	-99.84	chr12:117038922-117141489	TKS4_WT	TKS4_WT_T	62.4884	0		62.4884	0.1	-9.28744	0	1	0	1	lncRNA	chr12	117099481-117142091	+	ENSG00000258285.1
XLOC_028717	XLOC_028717	TEX41	28351.2	chr2:144667966-145264110	TKS4_WT	TKS4_WT_T	0	28.4512		0.1	28.4512	8.15235	0	1	0	1	lncRNA	chr2	144666312-145262988	+	ENSG00000226674.11
XLOC_043051	XLOC_043051	TFAP2A-AS1	-49.3032	chr6:10396676-10420060	TKS4_WT	TKS4_WT_T	168.361	85.3536	-0.980031	168.361	85.3536	-0.980034	-0.145485	0.7223	0.141282	0.999503	lncRNA	chr6	10409340-10416446	+	ENSG00000229950.1
XLOC_043050	XLOC_043050	TFAP2A-AS2	180.516	chr6:10396676-10420060	TKS4_WT	TKS4_WT_T	1192.85	3346.13	1.48808	1192.85	3346.13	1.48808	0.510472	0.60755	0.216418	0.999503	lncRNA	chr6	10404502-10407928	+	ENSG00000285278.1
XLOC_002955	XLOC_002955	TFAP2E-AS1	-3.73212	chr1:35568738-35595591	TKS4_WT	TKS4_WT_T	437.419	421.094	-0.0548739	437.419	421.094	-0.0548736	-0.0191088	0.91345	0.0393152	0.999503	lncRNA	chr1	35569807-35577771	-	ENSG00000239636.2
XLOC_033628	XLOC_033628	TFIP11-DT	0.579912	chr22:26483866-26514568	TKS4_WT	TKS4_WT_T	2053.76	2065.67	0.00834081	2053.76	2065.67	0.0083422	0.00132198	0.9928	0.00313823	0.999503	lncRNA	chr22	26512529-26514568	+	ENSG00000261188.2
XLOC_002180	XLOC_002180	TGFB2,TGFB2-OT1	267.183	chr1:218344195-218444619	TKS4_WT	TKS4_WT_T	1563.01	5739.11	1.8765	1563.01	5739.11	1.8765	1.34194	0.0667	1.17587	0.999503	protein_coding,lncRNA
XLOC_001561	XLOC_001561	THBS3-AS1	66.1391	chr1:155195587-155227534	TKS4_WT	TKS4_WT_T	1255.34	2085.61	0.732389	1255.34	2085.61	0.732391	0.182039	0.7265	0.138764	0.999503	lncRNA	chr1	155194997-155205495	+	ENSG00000231064.8
XLOC_042067	XLOC_042067	THBS4-AS1	-32.8396	chr5:79991331-80083753	TKS4_WT	TKS4_WT_T	124.977	83.935	-0.574315	124.977	83.935	-0.574318	-0.185272	0.75215	0.123696	0.999503	lncRNA	chr5	80052374-80083654	-	ENSG00000249825.6
XLOC_035246	XLOC_035246	THOC7-AS1	53965.2	chr3:63816945-64003462	TKS4_WT	TKS4_WT_T	0	54.0652		0.1	54.0652	9.07856	0	1	0	1	lncRNA	chr3	63860645-63861819	+	ENSG00000240549.2
XLOC_030422	XLOC_030422	THORLNC	21.3943	chr2:118182921-118186386	TKS4_WT	TKS4_WT_T	137.116	166.451	0.2797	137.116	166.451	0.279701	0.122619	0.8701	0.0604308	0.999503	lncRNA	chr2	118132128-118222250	-	ENSG00000226856.8
XLOC_012510	XLOC_012510	THRIL	-28.9909	chr12:124993644-125051845	TKS4_WT	TKS4_WT_T	1726.99	1226.32	-0.493926	1726.99	1226.32	-0.493924	-0.0578831	0.78135	0.107154	0.999503	lncRNA	chr12	125025434-125027410	-	ENSG00000280634.1
XLOC_036231	XLOC_036231	THUMPD3-AS1	36.1168	chr3:8980590-9397494	TKS4_WT	TKS4_WT_T	7053.83	9601.45	0.444846	7053.83	9601.45	0.444845	0.131021	0.791	0.101824	0.999503	lncRNA	chr3	9349689-9398579	-	ENSG00000206573.10
XLOC_037289	XLOC_037289	TIPARP-AS1	38.5737	chr3:156673170-156706770	TKS4_WT	TKS4_WT_T	555.43	769.68	0.470653	555.43	769.68	0.470654	0.0425987	0.8002	0.0968015	0.999503	lncRNA	chr3	156671859-156674446	-	ENSG00000243926.3
XLOC_036155	XLOC_036155	TM4SF19-AS1	53.1422	chr3:196291218-196338420	TKS4_WT	TKS4_WT_T	257.317	394.061	0.614872	257.317	394.061	0.614872	0.175123	0.8332	0.0792507	0.999503	lncRNA	chr3	196318330-196325570	+	ENSG00000235897.1
XLOC_016926	XLOC_016926	TMC3-AS1	-54.8066	chr15:81324332-81443076	TKS4_WT	TKS4_WT_T	742.896	335.74	-1.14582	742.896	335.74	-1.14582	-0.605285	0.3967	0.401538	0.999503	lncRNA	chr15	81324338-81518200	+	ENSG00000259343.8
XLOC_035684	XLOC_035684	TMCC1-DT	-13.8541	chr3:129893870-129908912	TKS4_WT	TKS4_WT_T	995.835	857.871	-0.215146	995.835	857.871	-0.215146	-0.150866	0.83775	0.0768856	0.999503	lncRNA	chr3	129893811-129918578	+	ENSG00000271270.8
XLOC_001738	XLOC_001738	TMCO1-AS1	70.0151	chr1:165768928-165775449	TKS4_WT	TKS4_WT_T	245.177	416.838	0.76566	245.177	416.838	0.765663	0.42316	0.5379	0.269298	0.999503	lncRNA	chr1	165768929-165775176	+	ENSG00000224358.1
XLOC_012490	XLOC_012490	TMED2-DT	54.6481	chr12:123581065-123584327	TKS4_WT	TKS4_WT_T	521.599	806.643	0.628989	521.599	806.643	0.628989	0.36573	0.6144	0.211549	0.999503	lncRNA	chr12	123575891-123585115	-	ENSG00000247373.3
XLOC_022806	XLOC_022806	TMEM105	-77.4162	chr17:81311264-81330674	TKS4_WT	TKS4_WT_T	365.378	82.5164	-2.14664	365.378	82.5164	-2.14664	-0.93922	0.2676	0.572514	0.999503	lncRNA	chr17	81311270-81330674	-	ENSG00000185332.8
XLOC_050440	XLOC_050440	TMEM139-AS1	-99.6799	chr7:143243130-143288049	TKS4_WT	TKS4_WT_T	31.2442	0		31.2442	0.1	-8.28744	0	1	0	1	lncRNA	chr7	143255264-143287997	-	ENSG00000231840.2
XLOC_026031	XLOC_026031	TMEM147-AS1	42.8393	chr19:35533455-35547526	TKS4_WT	TKS4_WT_T	3211.98	4587.97	0.514393	3211.98	4587.97	0.514393	0.12148	0.8552	0.0679323	0.999503	lncRNA	chr19	35540738-35546029	-	ENSG00000236144.9
XLOC_003554	XLOC_003554	TMEM167B-DT	-99.6799	chr1:109078319-109090737	TKS4_WT	TKS4_WT_T	31.2442	0		31.2442	0.1	-8.28744	0	1	0	1	lncRNA	chr1	109087971-109090858	-	ENSG00000273382.1
XLOC_027607	XLOC_027607	TMEM18-DT	-76.3303	chr2:663876-686825	TKS4_WT	TKS4_WT_T	120.201	28.4512	-2.07888	120.201	28.4512	-2.07889	0	1	0	1	lncRNA	chr2	677186-697382	+	ENSG00000233296.2
XLOC_017700	XLOC_017700	TMEM202-AS1	50.254	chr15:72398295-72474239	TKS4_WT	TKS4_WT_T	93.7326	140.837	0.587408	93.7326	140.837	0.587404	0.376447	0.61385	0.211938	0.999503	lncRNA	chr15	72407778-72475168	-	ENSG00000261423.2
XLOC_006656	XLOC_006656	TMEM254-AS1	23.0355	chr10:80046232-80092552	TKS4_WT	TKS4_WT_T	548.067	674.317	0.299075	548.067	674.317	0.299075	0.0810803	0.88055	0.055246	0.999503	lncRNA	chr10	80046860-80078912	-	ENSG00000230091.6
XLOC_043829	XLOC_043829	TMEM30A-DT	71.1989	chr6:75285013-75493800	TKS4_WT	TKS4_WT_T	274.233	469.484	0.775676	274.233	469.484	0.775674	0.397304	0.59535	0.225228	0.999503	lncRNA	chr6	75284992-75317525	+	ENSG00000225793.4
XLOC_036126	XLOC_036126	TMEM44-AS1	-63.16	chr3:194584267-194633819	TKS4_WT	TKS4_WT_T	382.294	140.837	-1.44065	382.294	140.837	-1.44066	-0.173908	0.46575	0.331847	0.999503	lncRNA	chr3	194583991-194590260	+	ENSG00000231770.7
XLOC_002687	XLOC_002687	TMEM51-AS1	44.5169	chr1:13893385-15220478	TKS4_WT	TKS4_WT_T	1216.73	1758.38	0.531233	1216.73	1758.38	0.531238	0.115856	0.8081	0.0925349	0.999503	lncRNA	chr1	15111815-15153618	-	ENSG00000175147.13
XLOC_007305	XLOC_007305	TMEM9B-AS1	-1.99222	chr11:8947201-8976283	TKS4_WT	TKS4_WT_T	1476.24	1446.83	-0.0290263	1476.24	1446.83	-0.0290319	-0.00709142	0.9797	0.00890689	0.999503	lncRNA	chr11	8964502-8977527	+	ENSG00000254860.7
XLOC_056656	XLOC_056656	TMLHE-AS1	-55.6088	chrX:155466539-155782459	TKS4_WT	TKS4_WT_T	182.689	81.0978	-1.17165	182.689	81.0978	-1.17166	-0.144863	0.67535	0.170471	0.999503	lncRNA	chrX	155466540-155611616	+	ENSG00000224533.4
XLOC_012247	XLOC_012247	TMPO-AS1	19.838	chr12:98512972-98550351	TKS4_WT	TKS4_WT_T	4276.28	5124.61	0.261086	4276.28	5124.61	0.261086	0.0229075	0.87285	0.0590604	0.999503	lncRNA	chr12	98512973-98516422	-	ENSG00000257167.3
XLOC_057309	XLOC_057309	TMSB15B-AS1	164.101	chrX:103881746-103974426	TKS4_WT	TKS4_WT_T	31.2442	82.5164	1.40109	31.2442	82.5164	1.40109	0.468356	0.5675	0.246034	0.999503	lncRNA	chrX	103845151-103919548	-	ENSG00000231728.5
XLOC_036146	XLOC_036146	TNK2-AS1	101.031	chr3:195863363-195913264	TKS4_WT	TKS4_WT_T	151.445	304.452	1.00742	151.445	304.452	1.00742	0.0866407	0.6405	0.193481	0.999503	lncRNA	chr3	195908076-195913986	+	ENSG00000224614.2
XLOC_034317	XLOC_034317	TNRC6B-DT	262.826	chr22:39994953-40044530	TKS4_WT	TKS4_WT_T	158.808	576.196	1.85927	158.808	576.196	1.85928	0.365077	0.53015	0.275601	0.999503	lncRNA	chr22	40043068-40044530	-	ENSG00000261202.1
XLOC_021284	XLOC_021284	TOB1-AS1	-34.216	chr17:50862222-50868371	TKS4_WT	TKS4_WT_T	906.081	596.056	-0.604192	906.081	596.056	-0.604192	-0.10229	0.82835	0.0817861	0.999503	lncRNA	chr17	50866679-50910774	+	ENSG00000229980.5
XLOC_051729	XLOC_051729	TONSL-AS1	127.652	chr8:144428774-144444488	TKS4_WT	TKS4_WT_T	62.4884	142.256	1.18683	62.4884	142.256	1.18683	0	1	0	1	lncRNA	chr8	144437675-144439971	+	ENSG00000232600.3
XLOC_002560	XLOC_002560	TP73-AS3	-99.9134	chr1:3652515-3747373	TKS4_WT	TKS4_WT_T	115.424	0		115.424	0.1	-10.1727		0.1371	0.862963	0.999503	lncRNA	chr1	3658938-3668772	-	ENSG00000227589.1
XLOC_017582	XLOC_017582	TPM1-AS	297.149	chr15:63042697-63071915	TKS4_WT	TKS4_WT_T	84.1803	334.321	1.98968	84.1803	334.321	1.98968	0.162315	0.4105	0.386687	0.999503	lncRNA	chr15	63046034-63049387	-	ENSG00000259498.1
XLOC_037516	XLOC_037516	TPRG1-AS1	-8.93926	chr3:188941714-188957657	TKS4_WT	TKS4_WT_T	31.2442	28.4512	-0.135099	31.2442	28.4512	-0.135099	0	1	0	1	lncRNA	chr3	188941715-188947639	-	ENSG00000234076.1
XLOC_012967	XLOC_012967	TPT1-AS1	-15.3153	chr13:45341344-45391483	TKS4_WT	TKS4_WT_T	1750.47	1482.38	-0.23983	1750.47	1482.38	-0.239827	-0.136452	0.84695	0.0721422	0.999503	lncRNA	chr13	45341345-45417975	+	ENSG00000170919.16
XLOC_044031	XLOC_044031	TRAF3IP2-AS1	6.24992	chr6:111299030-111605878	TKS4_WT	TKS4_WT_T	2296.35	2439.87	0.087461	2296.35	2439.87	0.0874617	0.014615	0.9434	0.0253041	0.999503	lncRNA	chr6	111483496-111598302	+	ENSG00000231889.8
XLOC_043721	XLOC_043721	TRAM2-AS1	18.0337	chr6:52577201-52583993	TKS4_WT	TKS4_WT_T	3747.32	4423.1	0.2392	3747.32	4423.1	0.239199	0.198552	0.7885	0.103198	0.999503	lncRNA	chr6	52576787-52643058	+	ENSG00000225791.7
XLOC_048297	XLOC_048297	TRG-AS1	-75.0103	chr7:38239576-38378637	TKS4_WT	TKS4_WT_T	666.079	166.451	-2.00059	666.079	166.451	-2.0006	-0.7556	0.38455	0.415047	0.999503	lncRNA	chr7	38330978-38378804	+	ENSG00000281103.3
XLOC_012098	XLOC_012098	TRHDE-AS1	-40.9306	chr12:72087287-72670758	TKS4_WT	TKS4_WT_T	1601.61	946.062	-0.75952	1601.61	946.062	-0.759516	-0.300593	0.7128	0.147032	0.999503	lncRNA	chr12	72249964-72276954	-	ENSG00000236333.4
XLOC_041556	XLOC_041556	TRIM52-AS1	-5.59013	chr5:181246540-181272307	TKS4_WT	TKS4_WT_T	6321.68	5968.29	-0.0829901	6321.68	5968.29	-0.0829904	-0.0433568	0.96	0.0177288	0.999503	lncRNA	chr5	181261169-181272307	+	ENSG00000248275.3
XLOC_041551	XLOC_041551	TRIM7-AS1	-88.1651	chr5:181192022-181218342	TKS4_WT	TKS4_WT_T	240.401	28.4512	-3.07888	240.401	28.4512	-3.07888	-0.506862	0.39015	0.408768	0.999503	lncRNA	chr5	181195496-181203103	+	ENSG00000250900.6
XLOC_041146	XLOC_041146	TRPC7-AS1	82.1215	chr5:136212744-136365545	TKS4_WT	TKS4_WT_T	31.2442	56.9024	0.864901	31.2442	56.9024	0.864901	0	1	0	1	lncRNA	chr5	136214048-136222159	+	ENSG00000248211.1
XLOC_033361	XLOC_033361	TRPM2-AS	-4.45938	chr21:44350111-44443081	TKS4_WT	TKS4_WT_T	293.337	280.256	-0.0658145	293.337	280.256	-0.0658138	-0.00656759	0.954	0.0204516	0.999503	lncRNA	chr21	44414588-44425272	-	ENSG00000230061.2
XLOC_043481	XLOC_043481	TSBP1-AS1	-54.4696	chr6:32255172-32408879	TKS4_WT	TKS4_WT_T	62.4884	28.4512	-1.1351	62.4884	28.4512	-1.1351	0	1	0	1	lncRNA	chr6	32254640-32407763	+	ENSG00000225914.4
XLOC_012957	XLOC_012957	TSC22D1-AS1	-29.8382	chr13:44432142-44580432	TKS4_WT	TKS4_WT_T	310.253	217.679	-0.511241	310.253	217.679	-0.511243	-0.0188304	0.80895	0.0920783	0.999503	lncRNA	chr13	44575893-44580432	+	ENSG00000278156.2
XLOC_056090	XLOC_056090	TSIX	28351.2	chrX:73792204-73852753	TKS4_WT	TKS4_WT_T	0	28.4512		0.1	28.4512	8.15235	0	1	0	1	lncRNA	chrX	73792205-73829231	+	ENSG00000270641.1
XLOC_032985	XLOC_032985	TSPEAR-AS1	-89.8821	chr21:44497892-44711572	TKS4_WT	TKS4_WT_T	281.198	28.4512	-3.30502	281.198	28.4512	-3.30502	0	1	0	1	lncRNA	chr21	44506807-44516575	+	ENSG00000235890.2
XLOC_032986	XLOC_032986	TSPEAR-AS2	32.3466	chr21:44497892-44711572	TKS4_WT	TKS4_WT_T	497.718	658.713	0.40432	497.718	658.713	0.404321	0.226562	0.8564	0.0673233	0.999503	lncRNA	chr21	44517216-44525952	+	ENSG00000182912.6
XLOC_021330	XLOC_021330	TSPOAP1-AS1	106.002	chr17:58301230-58418894	TKS4_WT	TKS4_WT_T	324.581	668.643	1.04265	324.581	668.643	1.04266	0.071316	0.55805	0.253327	0.999503	lncRNA	chr17	58324472-58415766	+	ENSG00000265148.7
XLOC_041754	XLOC_041754	TTC23L-AS1	-87.6754	chr5:34837713-34925996	TKS4_WT	TKS4_WT_T	230.849	28.4512	-3.02039	230.849	28.4512	-3.02039	-0.185278	0.3565	0.44794	0.999503	lncRNA	chr5	34837549-34839278	-	ENSG00000272323.1
XLOC_033642	XLOC_033642	TTC28-AS1	50.9589	chr22:27919375-28679865	TKS4_WT	TKS4_WT_T	5499.98	8302.71	0.594157	5499.98	8302.71	0.594156	0.523414	0.47005	0.327856	0.999503	lncRNA	chr22	27919376-28008581	+	ENSG00000235954.8
XLOC_033840	XLOC_033840	TTLL1-AS1	85253.6	chr22:43038584-43089418	TKS4_WT	TKS4_WT_T	0	85.3536		0.1	85.3536	9.73731	0	1	0	1	lncRNA	chr22	43038585-43052366	+	ENSG00000230319.1
XLOC_028924	XLOC_028924	TTN-AS1	-4.60333	chr2:178522826-178807423	TKS4_WT	TKS4_WT_T	11717.6	11178.2	-0.0679896	11717.6	11178.2	-0.0679892	-0.0578804	0.9324	0.0303977	0.999503	lncRNA	chr2	178521183-178779963	+	ENSG00000237298.10
XLOC_034038	XLOC_034038	TUBA3FP	72.65	chr22:20999103-21028013	TKS4_WT	TKS4_WT_T	146.669	253.224	0.787851	146.669	253.224	0.78785	0.0901538	0.7147	0.145876	0.999503	lncRNA	chr22	21008193-21014292	-	ENSG00000161149.12
XLOC_023774	XLOC_023774	TWSG1-DT	-99.9467	chr18:9318621-9334471	TKS4_WT	TKS4_WT_T	187.465	0		187.465	0.1	-10.8724	0	1	0	1	lncRNA	chr18	9310522-9334445	-	ENSG00000264964.2
XLOC_023715	XLOC_023715	TYMSOS	17.0271	chr18:596987-712660	TKS4_WT	TKS4_WT_T	1084.39	1269.03	0.226844	1084.39	1269.03	0.226842	0.0164047	0.89345	0.0489297	0.999503	lncRNA	chr18	630886-658340	-	ENSG00000176912.6
XLOC_013950	XLOC_013950	UBAC2-AS1	21.1685	chr13:99196373-99386504	TKS4_WT	TKS4_WT_T	2837.85	3438.58	0.277013	2837.85	3438.58	0.277015	0.0732267	0.8981	0.0466753	0.999503	lncRNA	chr13	99181223-99200757	-	ENSG00000228889.8
XLOC_038497	XLOC_038497	UBE2D3-AS1	-28.0653	chr4:102777036-102868895	TKS4_WT	TKS4_WT_T	889.963	640.192	-0.475241	889.963	640.192	-0.475241	-0.0298518	0.7879	0.103529	0.999503	lncRNA	chr4	102827611-102844099	+	ENSG00000246560.3
XLOC_031379	XLOC_031379	UBOX5-AS1	-99.6799	chr20:3106910-3159865	TKS4_WT	TKS4_WT_T	31.2442	0		31.2442	0.1	-8.28744	0	1	0	1	lncRNA	chr20	3106913-3150867	+	ENSG00000235958.5
XLOC_036157	XLOC_036157	UBXN7-AS1	28351.2	chr3:196347658-196454323	TKS4_WT	TKS4_WT_T	0	28.4512		0.1	28.4512	8.15235	0	1	0	1	lncRNA	chr3	196431385-196432530	+	ENSG00000225822.4
XLOC_024581	XLOC_024581	UCA1	-79.3934	chr19:15827044-15836321	TKS4_WT	TKS4_WT_T	34229.5	7053.53	-2.27882	34229.5	7053.53	-2.27882	-1.97554	0.0082	2.08619	0.820669	lncRNA	chr19	15828206-15836328	+	ENSG00000214049.8
XLOC_031983	XLOC_031983	UCKL1-AS1	29.8236	chr20:63939828-63969930	TKS4_WT	TKS4_WT_T	519.41	674.317	0.376553	519.41	674.317	0.376553	0.0452295	0.8406	0.0754106	0.999503	lncRNA	chr20	63953384-63956985	+	ENSG00000280213.1
XLOC_045392	XLOC_045392	UFL1-AS1	-12.1252	chr6:96364770-96521741	TKS4_WT	TKS4_WT_T	19472.7	17111.6	-0.186476	19472.7	17111.6	-0.186478	-0.200753	0.78765	0.103667	0.999503	lncRNA	chr6	96199840-96521717	-	ENSG00000233797.3
XLOC_038101	XLOC_038101	UGDH-AS1	6.60908	chr4:39527838-39638865	TKS4_WT	TKS4_WT_T	1100.91	1173.67	0.0923318	1100.91	1173.67	0.0923303	0.022159	0.9636	0.0161032	0.999503	lncRNA	chr4	39527720-39594707	+	ENSG00000249348.2
XLOC_006567	XLOC_006567	UNC5B-AS1	40.046	chr10:71212534-71302879	TKS4_WT	TKS4_WT_T	863.495	1209.29	0.485907	863.495	1209.29	0.485901	0.0885859	0.8758	0.0575951	0.999503	lncRNA	chr10	71217220-71218294	-	ENSG00000237512.7
XLOC_026034	XLOC_026034	UPK1A-AS1	18.8854	chr19:35666515-35678485	TKS4_WT	TKS4_WT_T	1209.77	1438.24	0.249577	1209.77	1438.24	0.249572	0.137992	0.8491	0.0710412	0.999503	lncRNA	chr19	35667948-35673304	-	ENSG00000226510.2
XLOC_024769	XLOC_024769	UQCRFS1-DT	82.1215	chr19:29213232-29223137	TKS4_WT	TKS4_WT_T	31.2442	56.9024	0.864901	31.2442	56.9024	0.864901	0	1	0	1	lncRNA	chr19	29213235-29216604	+	ENSG00000267498.2
XLOC_032842	XLOC_032842	URB1-AS1	-13.2405	chr21:32393132-32393960	TKS4_WT	TKS4_WT_T	5173.6	4488.59	-0.204907	5173.6	4488.59	-0.204906	-0.179519	0.7905	0.102098	0.999503	lncRNA	chr21	32393130-32393960	+	ENSG00000256073.3
XLOC_056967	XLOC_056967	USP27X-DT	-22.9765	chrX:49876723-49879356	TKS4_WT	TKS4_WT_T	899.515	692.838	-0.376629	899.515	692.838	-0.376629	-0.266934	0.72115	0.141974	0.999503	lncRNA	chrX	49876724-49879241	-	ENSG00000234390.4
XLOC_008386	XLOC_008386	USP2-AS1	-8.46877	chr11:119381777-119499233	TKS4_WT	TKS4_WT_T	1810.77	1657.42	-0.127664	1810.77	1657.42	-0.127664	-0.0774986	0.91495	0.0386026	0.999503	lncRNA	chr11	119364359-119526664	+	ENSG00000245248.8
XLOC_012323	XLOC_012323	USP30-AS1	206.399	chr12:109023088-109088026	TKS4_WT	TKS4_WT_T	26.468	81.0978	1.61541	26.468	81.0978	1.61541	0	1	0	1	lncRNA	chr12	109052349-109053984	-	ENSG00000256262.2
XLOC_017587	XLOC_017587	USP3-AS1	7.28263	chr15:63504592-63603432	TKS4_WT	TKS4_WT_T	283.785	304.452	0.101414	283.785	304.452	0.101416	0.00701616	0.9465	0.0238794	0.999503	lncRNA	chr15	63544247-63601589	-	ENSG00000259248.7
XLOC_038171	XLOC_038171	USP46-DT	-44.9127	chr4:52659405-52661498	TKS4_WT	TKS4_WT_T	800.608	441.033	-0.860208	800.608	441.033	-0.860209	-0.567386	0.4197	0.377061	0.999503	lncRNA	chr4	52659406-52661668	+	ENSG00000248866.1
XLOC_005044	XLOC_005044	USP6NL-AS1	168.642	chr10:11453945-11612227	TKS4_WT	TKS4_WT_T	62.4884	167.87	1.42568	62.4884	167.87	1.42568	0.136968	0.5763	0.239351	0.999503	lncRNA	chr10	11611305-11612227	+	ENSG00000271360.1
XLOC_018576	XLOC_018576	USP7-AS1	-64.1691	chr16:8892093-8967367	TKS4_WT	TKS4_WT_T	79.4041	28.4512	-1.48073	79.4041	28.4512	-1.48072	0	1	0	1	lncRNA	chr16	8962706-8966990	+	ENSG00000260979.1
XLOC_045724	XLOC_045724	UST-AS1	159.561	chr6:148745890-149076990	TKS4_WT	TKS4_WT_T	31.2442	81.0978	1.37608	31.2442	81.0978	1.37607	0	1	0	1	lncRNA	chr6	148955628-148964684	-	ENSG00000227660.1
XLOC_009480	XLOC_009480	UVRAG-DT	-99.6799	chr11:75813513-75814797	TKS4_WT	TKS4_WT_T	31.2442	0		31.2442	0.1	-8.28744	0	1	0	1	lncRNA	chr11	75803431-75815406	-	ENSG00000255507.7
XLOC_055846	XLOC_055846	UXT-AS1	-99.9134	chrX:47651791-47660111	TKS4_WT	TKS4_WT_T	115.424	0		115.424	0.1	-10.1727		0.1441	0.841336	0.999503	lncRNA	chrX	47658833-47692326	+	ENSG00000267064.2
XLOC_015581	XLOC_015581	VASH1-AS1	-10.4768	chr14:76761456-76812882	TKS4_WT	TKS4_WT_T	41256.9	36934.5	-0.159667	41256.9	36934.5	-0.159666	-0.123461	0.8605	0.0652491	0.999503	lncRNA
XLOC_006193	XLOC_006193	VIM-AS1	6.26102	chr10:17214238-17237593	TKS4_WT	TKS4_WT_T	1253.15	1331.61	0.0876114	1253.15	1331.61	0.0876125	0.0266212	0.96	0.0177288	0.999503	lncRNA	chr10	17214239-17230018	-	ENSG00000229124.8
XLOC_054313	XLOC_054313	VLDLR-AS1	-99.6799	chr9:2535651-2667976	TKS4_WT	TKS4_WT_T	31.2442	0		31.2442	0.1	-8.28744	0	1	0	1	lncRNA	chr9	2421597-2622457	-	ENSG00000236404.12
XLOC_052512	XLOC_052512	VPS13B-DT	-80.1703	chr8:98996759-99013031	TKS4_WT	TKS4_WT_T	416.125	82.5164	-2.33427	416.125	82.5164	-2.33426	-0.655221	0.42895	0.367593	0.999503	lncRNA	chr8	98957575-99013743	-	ENSG00000253948.3
XLOC_017041	XLOC_017041	VPS33B-DT	27.4703	chr15:90998415-91031139	TKS4_WT	TKS4_WT_T	216.521	276	0.350167	216.521	276	0.350161	0.0408684	0.85885	0.0660827	0.999503	lncRNA	chr15	91022619-91036611	+	ENSG00000214432.9
XLOC_016563	XLOC_016563	VPS39-DT	-99.6222	chr15:42208357-42353666	TKS4_WT	TKS4_WT_T	26.468	0		26.468	0.1	-8.04811	0	1	0	1	lncRNA	chr15	42208413-42226990	+	ENSG00000261002.5
XLOC_019347	XLOC_019347	VPS9D1-AS1	-4.92301	chr16:89707132-89816647	TKS4_WT	TKS4_WT_T	18559.8	17646.1	-0.0728334	18559.8	17646.1	-0.0728318	-0.0280184	0.82315	0.084521	0.999503	lncRNA	chr16	89711856-89718165	+	ENSG00000261373.1
XLOC_012935	XLOC_012935	VWA8-AS1	181.564	chr13:41961168-42013878	TKS4_WT	TKS4_WT_T	110.648	311.545	1.49346	110.648	311.545	1.49346	0.692732	0.39195	0.406769	0.999503	lncRNA	chr13	41955808-41981565	+	ENSG00000278338.4
XLOC_006268	XLOC_006268	WAC-AS1	-33.6612	chr10:28519916-28532354	TKS4_WT	TKS4_WT_T	5552.12	3683.21	-0.592074	5552.12	3683.21	-0.592075	-0.520979	0.4533	0.343614	0.999503	lncRNA	chr10	28522652-28533066	-	ENSG00000254635.6
XLOC_045669	XLOC_045669	WAKMAR2	109.626	chr6:137823668-137883312	TKS4_WT	TKS4_WT_T	26.468	55.4838	1.06781	26.468	55.4838	1.06782	0.100831	0.59335	0.226689	0.999503	lncRNA	chr6	137823673-137868233	-	ENSG00000237499.7
XLOC_001262	XLOC_001262	WARS2-AS1	-20.8541	chr1:119031215-119275973	TKS4_WT	TKS4_WT_T	4659.17	3687.54	-0.337412	4659.17	3687.54	-0.337414	-0.166371	0.83325	0.0792247	0.999503	lncRNA	chr1	119140391-119275973	+	ENSG00000231365.7
XLOC_057728	XLOC_057728	WASIR1	56802.4	chrX:156014563-156016830	TKS4_WT	TKS4_WT_T	0	56.9024		0.1	56.9024	9.15235	0	1	0	1	lncRNA	chrY	57201143-57203357	-	ENSG00000185203.12_PAR_Y
XLOC_018393	XLOC_018393	WASIR2	-99.6799	chr16:22915-25114	TKS4_WT	TKS4_WT_T	31.2442	0		31.2442	0.1	-8.28744	0	1	0	1	lncRNA	chr16	22910-25123	+	ENSG00000231439.4
XLOC_048964	XLOC_048964	WASL-DT	44.7801	chr7:123749194-123750981	TKS4_WT	TKS4_WT_T	2429.09	3516.84	0.533864	2429.09	3516.84	0.533864	0.454328	0.4942	0.306097	0.999503	lncRNA	chr7	123749068-123751166	+	ENSG00000272686.1
XLOC_038410	XLOC_038410	WDFY3-AS2	21.7355	chr4:84669548-85008743	TKS4_WT	TKS4_WT_T	1375.54	1674.52	0.283751	1375.54	1674.52	0.28375	0.0420254	0.8546	0.0682371	0.999503	lncRNA	chr4	84965534-85011277	+	ENSG00000180769.10
XLOC_023550	XLOC_023550	WDR7-OT1	-37.3569	chr18:57034085-57049295	TKS4_WT	TKS4_WT_T	408.762	256.061	-0.674774	408.762	256.061	-0.674774	-0.592611	0.58625	0.231917	0.999503	lncRNA	chr18	57027832-57038845	+	ENSG00000267225.1
XLOC_050415	XLOC_050415	WEE2-AS1	-85.7762	chr7:141704337-141738230	TKS4_WT	TKS4_WT_T	190.052	27.0326	-2.81363	190.052	27.0326	-2.81362	-1.84271	0.3743	0.42678	0.999503	lncRNA	chr7	141704003-141738346	-	ENSG00000228775.8
XLOC_040134	XLOC_040134	WWC2-AS2	282.353	chr4:183097020-183320777	TKS4_WT	TKS4_WT_T	702.099	2684.5	1.93491	702.099	2684.5	1.93491	0.268163	0.35555	0.449099	0.999503	lncRNA	chr4	183097017-183099199	-	ENSG00000251359.4
XLOC_035810	XLOC_035810	WWTR1-AS1	22.2482	chr3:149517234-149724788	TKS4_WT	TKS4_WT_T	435.23	532.061	0.289815	435.23	532.061	0.289814	0.0241001	0.87915	0.055937	0.999503	lncRNA	chr3	149656999-149661364	+	ENSG00000241313.3
XLOC_057363	XLOC_057363	XACT	28351.2	chrX:113616299-113618153	TKS4_WT	TKS4_WT_T	0	28.4512		0.1	28.4512	8.15235	0	1	0	1	lncRNA	chrX	113616300-114059289	-	ENSG00000241743.4
XLOC_057143	XLOC_057143	XIST	343.824	chrX:73792204-73852753	TKS4_WT	TKS4_WT_T	177.913	789.62	2.14999	177.913	789.62	2.14999	1.12991	0.16985	0.769934	0.999503	lncRNA	chrX	73820649-73852723	-	ENSG00000229807.13
XLOC_034818	XLOC_034818	XPC-AS1	-66.2021	chr3:14145144-14178601	TKS4_WT	TKS4_WT_T	84.1803	28.4512	-1.56499	84.1803	28.4512	-1.56499	-0.128196	0.5502	0.259479	0.999503	lncRNA	chr3	14144637-14165978	+	ENSG00000228242.6
XLOC_037463	XLOC_037463	YEATS2-AS1	165.236	chr3:183697796-183812625	TKS4_WT	TKS4_WT_T	124.977	331.484	1.40728	124.977	331.484	1.40728	0.158596	0.5596	0.252122	0.999503	lncRNA	chr3	183806457-183810783	-	ENSG00000233885.7
XLOC_052256	XLOC_052256	YTHDF3-DT	32.917	chr8:63167724-63168442	TKS4_WT	TKS4_WT_T	1188.08	1579.16	0.41053	1188.08	1579.16	0.410525	0.281864	0.7052	0.151688	0.999503	lncRNA	chr8	63167725-63168442	-	ENSG00000270673.1
XLOC_040799	XLOC_040799	ZBED3-AS1	3.28642	chr5:77072071-77148351	TKS4_WT	TKS4_WT_T	680.407	702.768	0.0466507	680.407	702.768	0.0466505	0.0117221	0.9615	0.0170507	0.999503	lncRNA	chr5	77086688-77166909	+	ENSG00000250802.7
XLOC_007326	XLOC_007326	ZBED5-AS1	-36.3943	chr11:10858216-10879276	TKS4_WT	TKS4_WT_T	2963.62	1885.03	-0.652775	2963.62	1885.03	-0.652773	-0.505253	0.4619	0.335452	0.999503	lncRNA	chr11	10858179-10908972	+	ENSG00000247271.8
XLOC_035450	XLOC_035450	ZBTB11-AS1	8.81466	chr3:101648888-101679217	TKS4_WT	TKS4_WT_T	3816.37	4152.77	0.121874	3816.37	4152.77	0.121873	0.0299307	0.95455	0.0202013	0.999503	lncRNA	chr3	101676475-101679217	+	ENSG00000256628.3
XLOC_035534	XLOC_035534	ZBTB20-AS4	-99.8111	chr3:114291101-115147288	TKS4_WT	TKS4_WT_T	52.9361	0		52.9361	0.1	-9.04811	0	1	0	1	lncRNA	chr3	115100423-115103061	+	ENSG00000242767.1
XLOC_008517	XLOC_008517	ZBTB44-DT	28351.2	chr11:130314992-130403657	TKS4_WT	TKS4_WT_T	0	28.4512		0.1	28.4512	8.15235	0	1	0	1	lncRNA	chr11	130314993-130403657	+	ENSG00000175773.14
XLOC_006295	XLOC_006295	ZEB1-AS1	157.221	chr10:31307716-31529814	TKS4_WT	TKS4_WT_T	1387.68	3569.4	1.36301	1387.68	3569.4	1.36301	0.580467	0.47945	0.319257	0.999503	lncRNA	chr10	31206278-31320447	-	ENSG00000237036.6
XLOC_048012	XLOC_048012	ZFAND2A-DT	-27.8637	chr7:1160373-1165958	TKS4_WT	TKS4_WT_T	5650.43	4076.01	-0.471202	5650.43	4076.01	-0.471203	-0.361848	0.6564	0.182831	0.999503	lncRNA	chr7	1160374-1165607	+	ENSG00000229043.3
XLOC_031809	XLOC_031809	ZFAS1	11.6847	chr20:49278177-49289260	TKS4_WT	TKS4_WT_T	109168	121924	0.159423	109168	121924	0.159432	0.12777	0.89195	0.0496595	0.999503	lncRNA	chr20	49278178-49299600	+	ENSG00000177410.13
XLOC_052584	XLOC_052584	ZFPM2-AS1	14.1425	chr8:105318437-106060503	TKS4_WT	TKS4_WT_T	5238.68	5979.56	0.190836	5238.68	5979.56	0.190836	0.140807	0.84535	0.0729634	0.999503	lncRNA	chr8	105546089-106060524	-	ENSG00000251003.9
XLOC_018739	XLOC_018739	ZKSCAN2-DT	8.22338	chr16:25236000-25261066	TKS4_WT	TKS4_WT_T	2341.13	2533.65	0.114018	2341.13	2533.65	0.114012	0.0330529	0.9465	0.0238794	0.999503	lncRNA	chr16	25257952-25261066	+	ENSG00000274925.1
XLOC_036469	XLOC_036469	ZKSCAN7-AS1	-99.6222	chr3:44555192-44685782	TKS4_WT	TKS4_WT_T	26.468	0		26.468	0.1	-8.04811	0	1	0	1	lncRNA	chr3	44556987-44685665	-	ENSG00000236869.2
XLOC_006638	XLOC_006638	ZMIZ1-AS1	-39.2927	chr10:78943325-79067448	TKS4_WT	TKS4_WT_T	187.465	113.805	-0.720061	187.465	113.805	-0.720057	0	1	0	1	lncRNA	chr10	78943328-79067895	-	ENSG00000224596.9
XLOC_002952	XLOC_002952	ZMYM4-AS1	28351.2	chr1:35268693-35422058	TKS4_WT	TKS4_WT_T	0	28.4512		0.1	28.4512	8.15235	0	1	0	1	lncRNA	chr1	35358822-35366077	-	ENSG00000227409.1
XLOC_026307	XLOC_026307	ZNF114-AS1	63.4132	chr19:48262698-48287608	TKS4_WT	TKS4_WT_T	132.34	216.261	0.708521	132.34	216.261	0.708524	31.1204	0.76945	0.11382	0.999503	lncRNA	chr19	48262900-48271283	-	ENSG00000268186.1
XLOC_032159	XLOC_032159	ZNF133-AS1	28351.2	chr20:18288519-18362899	TKS4_WT	TKS4_WT_T	0	28.4512		0.1	28.4512	8.15235	0	1	0	1	lncRNA	chr20	18313765-18315111	-	ENSG00000237259.1
XLOC_036471	XLOC_036471	ZNF197-AS1	56.6448	chr3:44555192-44685782	TKS4_WT	TKS4_WT_T	156.221	244.712	0.647497	156.221	244.712	0.647496	0.0572886	0.79435	0.0999881	0.999503	lncRNA	chr3	44617128-44624797	-	ENSG00000233509.2
XLOC_019466	XLOC_019466	ZNF213-AS1	-52.0251	chr16:3125528-3134882	TKS4_WT	TKS4_WT_T	177.913	85.3536	-1.05965	177.913	85.3536	-1.05965	-0.681121	0.3309	0.480303	0.999503	lncRNA	chr16	3100696-3143734	-	ENSG00000263072.9
XLOC_006385	XLOC_006385	ZNF22-AS1	124.553	chr10:44959752-45000803	TKS4_WT	TKS4_WT_T	531.55	1193.61	1.16706	531.55	1193.61	1.16705	0.420291	0.67425	0.171179	0.999503	lncRNA	chr10	44997698-45000888	-	ENSG00000165511.6
XLOC_026221	XLOC_026221	ZNF230-DT	-99.8876	chr19:43951195-44002870	TKS4_WT	TKS4_WT_T	88.9564	0		88.9564	0.1	-9.79695		0.21325	0.671111	0.999503	lncRNA	chr19	43996896-44003298	-	ENSG00000266921.2
XLOC_020580	XLOC_020580	ZNF232-AS1	-35.0639	chr17:5105733-5191883	TKS4_WT	TKS4_WT_T	7508.37	4875.64	-0.622907	7508.37	4875.64	-0.622908	-0.291704	0.8154	0.0886293	0.999503	lncRNA	chr17	5111468-5115004	+	ENSG00000234327.9
XLOC_024169	XLOC_024169	ZNF236-DT	242.249	chr18:76794731-76822295	TKS4_WT	TKS4_WT_T	88.9564	304.452	1.77504	88.9564	304.452	1.77504	0.803306	0.2647	0.577246	0.999503	lncRNA	chr18	76794732-76822295	-	ENSG00000264278.1
XLOC_051741	XLOC_051741	ZNF252P-AS1	-33.5398	chr8:144973588-145006046	TKS4_WT	TKS4_WT_T	449.558	298.777	-0.589438	449.558	298.777	-0.589438	-0.0679086	0.7982	0.0978883	0.999503	lncRNA	chr8	145002811-145006046	+	ENSG00000255559.1
XLOC_032945	XLOC_032945	ZNF295-AS1	-13.4796	chr21:41986830-42024920	TKS4_WT	TKS4_WT_T	31.2442	27.0326	-0.208887	31.2442	27.0326	-0.208888	0	1	0	1	lncRNA	chr21	42009194-42055130	+	ENSG00000237232.9
XLOC_005291	XLOC_005291	ZNF32-AS1	-99.9055	chr10:43628816-43674699	TKS4_WT	TKS4_WT_T	105.872	0		105.872	0.1	-10.0481	0	1	0	1	lncRNA	chr10	43643872-43645047	+	ENSG00000226245.1
XLOC_031547	XLOC_031547	ZNF337-AS1	-18.3169	chr20:25624044-25696879	TKS4_WT	TKS4_WT_T	512.047	418.256	-0.291888	512.047	418.256	-0.29189	-0.0430328	0.8649	0.0630341	0.999503	lncRNA	chr20	25624045-25689032	+	ENSG00000213742.7
XLOC_024153	XLOC_024153	ZNF407-AS1	23.9117	chr18:74590474-75065671	TKS4_WT	TKS4_WT_T	7279.1	9019.66	0.309313	7279.1	9019.66	0.309313	0.153876	0.55185	0.258179	0.999503	lncRNA	chr18	74590317-74598885	-	ENSG00000264247.2
XLOC_024487	XLOC_024487	ZNF433-AS1	81.3049	chr19:11987616-12052961	TKS4_WT	TKS4_WT_T	704.686	1277.63	0.858411	704.686	1277.63	0.858418	0.517371	0.4665	0.331148	0.999503	lncRNA	chr19	11987617-12046275	+	ENSG00000219665.8
XLOC_000336	XLOC_000336	ZNF436-AS1	41.7209	chr1:23359447-23371839	TKS4_WT	TKS4_WT_T	1342.11	1902.05	0.503057	1342.11	1902.05	0.503052	0.135191	0.7949	0.0996875	0.999503	lncRNA	chr1	23368949-23371839	+	ENSG00000249087.8
XLOC_025019	XLOC_025019	ZNF45-AS1	-48.1259	chr19:43901867-43935315	TKS4_WT	TKS4_WT_T	274.233	142.256	-0.946912	274.233	142.256	-0.946913	-0.153458	0.52845	0.276996	0.999503	lncRNA	chr19	43901866-43927767	+	ENSG00000267191.3
XLOC_026572	XLOC_026572	ZNF460-AS1	-6.50161	chr19:57267192-57294069	TKS4_WT	TKS4_WT_T	120.201	112.386	-0.0969795	120.201	112.386	-0.0969866	-0.00526969	0.90725	0.042273	0.999503	lncRNA	chr19	57267211-57280334	-	ENSG00000267871.6
XLOC_042301	XLOC_042301	ZNF474-AS1	82.1215	chr5:122110780-122182663	TKS4_WT	TKS4_WT_T	31.2442	56.9024	0.864901	31.2442	56.9024	0.864901	0	1	0	1	lncRNA	chr5	122154496-122156015	-	ENSG00000249610.1
XLOC_025446	XLOC_025446	ZNF497-AS1	168.732	chr19:58345182-58366578	TKS4_WT	TKS4_WT_T	52.9361	142.256	1.42617	52.9361	142.256	1.42617	0	1	0	1	lncRNA	chr19	58362569-58367620	+	ENSG00000269054.3
XLOC_005526	XLOC_005526	ZNF503-AS1	-33.8816	chr10:75279724-75408982	TKS4_WT	TKS4_WT_T	3128.6	2068.58	-0.596874	3128.6	2068.58	-0.596876	-0.193865	0.73005	0.136647	0.999503	lncRNA	chr10	75243568-75373500	+	ENSG00000226051.9
XLOC_005527	XLOC_005527	ZNF503-AS2	12.3635	chr10:75279724-75408982	TKS4_WT	TKS4_WT_T	1216.73	1367.16	0.168164	1216.73	1367.16	0.168173	0.0389426	0.91045	0.0407439	0.999503	lncRNA	chr10	75401519-75408982	+	ENSG00000237149.5
XLOC_023677	XLOC_023677	ZNF516-AS1	97.6355	chr18:76357681-76495255	TKS4_WT	TKS4_WT_T	396.622	783.866	0.982842	396.622	783.866	0.982842	0.106077	0.6091	0.215311	0.999503	lncRNA	chr18	76491629-76493920	+	ENSG00000265778.4
XLOC_023678	XLOC_023678	ZNF516-DT	5.92659	chr18:76495338-76498089	TKS4_WT	TKS4_WT_T	550.654	583.289	0.0830644	550.654	583.289	0.0830648	0.0561199	0.93585	0.0287938	0.999503	lncRNA	chr18	76495521-76498088	+	ENSG00000275763.3
XLOC_024431	XLOC_024431	ZNF561-AS1	87.631	chr19:9621481-9634862	TKS4_WT	TKS4_WT_T	1233.65	2314.71	0.907903	1233.65	2314.71	0.907898	0.679458	0.3262	0.486516	0.999503	lncRNA	chr19	9621249-9674662	+	ENSG00000267106.9
XLOC_024881	XLOC_024881	ZNF566-AS1	-33.7739	chr19:36445118-36491040	TKS4_WT	TKS4_WT_T	343.686	227.61	-0.59453	343.686	227.61	-0.594527	0	1	0	1	lncRNA	chr19	36489649-36491040	+	ENSG00000267309.1
XLOC_020582	XLOC_020582	ZNF594-DT	-22.8941	chr17:5192006-5236003	TKS4_WT	TKS4_WT_T	863.495	665.806	-0.375086	863.495	665.806	-0.375086	-0.266764	0.73805	0.131914	0.999503	lncRNA	chr17	5192007-5248182	+	ENSG00000261879.8
XLOC_055828	XLOC_055828	ZNF674-AS1	65.8469	chrX:46545489-46548475	TKS4_WT	TKS4_WT_T	3353.28	5561.31	0.72985	3353.28	5561.31	0.729852	0.576881	0.42005	0.376699	0.999503	lncRNA	chrX	46545438-46548841	+	ENSG00000230844.3
XLOC_003883	XLOC_003883	ZNF687-AS1	10.8773	chr1:151280023-151327715	TKS4_WT	TKS4_WT_T	476.026	527.805	0.148965	476.026	527.805	0.148965	0.01247	0.93455	0.0293975	0.999503	lncRNA	chr1	151279678-151281970	-	ENSG00000232671.7
XLOC_017905	XLOC_017905	ZNF710-AS1	-20.2054	chr15:90001323-90082207	TKS4_WT	TKS4_WT_T	213.933	170.707	-0.325637	213.933	170.707	-0.325637	-0.0624191	0.85875	0.0661332	0.999503	lncRNA	chr15	90074512-90082207	-	ENSG00000259291.2
XLOC_050501	XLOC_050501	ZNF775-AS1	28351.2	chr7:150379329-150405461	TKS4_WT	TKS4_WT_T	0	28.4512		0.1	28.4512	8.15235	0	1	0	1	lncRNA	chr7	150379854-150383885	-	ENSG00000239377.1
XLOC_012587	XLOC_012587	ZNF84-DT	-99.8111	chr12:133032658-133037222	TKS4_WT	TKS4_WT_T	52.9361	0		52.9361	0.1	-9.04811	0	1	0	1	lncRNA	chr12	133030389-133037222	-	ENSG00000246394.7
XLOC_026595	XLOC_026595	ZNF8-DT	-44.9135	chr19:58228593-58278791	TKS4_WT	TKS4_WT_T	909.067	500.773	-0.860231	909.067	500.773	-0.86023	-0.10256	0.64455	0.190743	0.999503	lncRNA	chr19	58257270-58278826	-	ENSG00000268516.3
XLOC_052536	XLOC_052536	ZNNT1	112.757	chr8:101166804-101170239	TKS4_WT	TKS4_WT_T	2096.35	4460.14	1.08921	2096.35	4460.14	1.08921	0.862576	0.2225	0.65267	0.999503	lncRNA	chr8	101166805-101169629	-	ENSG00000261087.1
XLOC_034153	XLOC_034153	ZNRF3-AS1	109.626	chr22:28800656-29057488	TKS4_WT	TKS4_WT_T	26.468	55.4838	1.06781	26.468	55.4838	1.06782	0.0738781	0.6111	0.213888	0.999503	lncRNA	chr22	29024999-29031476	-	ENSG00000177993.3
XLOC_000881	XLOC_000881	ZRANB2-AS1	113705	chr1:70812473-71081035	TKS4_WT	TKS4_WT_T	0	113.805		0.1	113.805	10.1523	0	1	0	1	lncRNA	chr1	71048855-71067184	+	ENSG00000235079.1
XLOC_044748	XLOC_044748	ZSCAN16-AS1	12.1819	chr6:28121794-28137316	TKS4_WT	TKS4_WT_T	1014.54	1138.13	0.165835	1014.54	1138.13	0.16584	0.0580737	0.9335	0.0298857	0.999503	lncRNA	chr6	28015122-28137313	-	ENSG00000269293.4
XLOC_025386	XLOC_025386	ZSCAN5A-AS1	26932.6	chr19:56219669-56379828	TKS4_WT	TKS4_WT_T	0	27.0326		0.1	27.0326	8.07856	0	1	0	1	lncRNA	chr19	56314703-56365316	+	ENSG00000267549.6
XLOC_006601	XLOC_006601	ZSWIM8-AS1	39.3321	chr10:73785576-73801798	TKS4_WT	TKS4_WT_T	610.555	850.699	0.478526	610.555	850.699	0.478527	0.0773996	0.83235	0.079694	0.999503	lncRNA	chr10	73796514-73801399	-	ENSG00000272589.1

## Sheet: B (KO_WT_lncRNA)
test_id	gene_id	gene	%	locus	sample_1	sample_2	value_1	value_2	log2(fold_change)	value_1_corrected	value_2_corrected	Log10(FC)	Average FPKM	Log10(FPKM)	log2(fold_change)_corrected	test_stat	p_value	-log10(p_value)	q_value	type	chr_name	chr_location	chain	ENSG_id
XLOC_025445	XLOC_025445	A1BG-AS1	117.508	chr19:58345182-58366578	TKS4_WT	TKS4_KO	32.1878	70.0112	1.12107	32.1878	70.0112	0.337476	51.0995	1.70842	1.12107	0	1	0	1	lncRNA	chr19	58347718-58355455	+	ENSG00000268895.6
XLOC_010255	XLOC_010255	A2M-AS1	17.9165	chr12:8950043-9215657	TKS4_WT	TKS4_KO	978.989	1154.39	0.237761	978.989	1154.39	0.0715747	1066.69	3.02804	0.237766	0.126062	0.88065	0.0551967	0.9999	lncRNA	chr12	9065163-9068689	+	ENSG00000245105.4
XLOC_037256	XLOC_037256	AADACL2-AS1	31.3961	chr3:151733926-151928175	TKS4_WT	TKS4_KO	257.503	338.349	0.393925	257.503	338.349	0.118583	297.926	2.47411	0.393923	0.0984563	0.882	0.0545314	0.9999	lncRNA	chr3	151751443-151928175	-	ENSG00000242908.6
XLOC_056092	XLOC_056092	AARSD1P1,JPX	6.73129	chrX:73944323-74293574	TKS4_WT	TKS4_KO	1008.87	1076.78	0.0939884	1008.87	1076.78	0.0282918	1042.83	3.01821	0.0939832	0.0294886	0.9635	0.0161483	0.9999	lncRNA
XLOC_033349	XLOC_033349	AATBC	65.6231	chr21:43805757-43812567	TKS4_WT	TKS4_KO	275.566	456.401	0.727906	275.566	456.401	0.219121	365.983	2.56346	0.727904	0.451536	0.4872	0.312293	0.9999	lncRNA	chr21	43805758-43812567	-	ENSG00000215458.8
XLOC_031598	XLOC_031598	ABALON	59.149	chr20:31664451-31723963	TKS4_WT	TKS4_KO	7650.69	12176	0.670374	7650.69	12176	0.201804	9913.34	3.99622	0.670378	0.154863	0.7339	0.134363	0.9999	lncRNA	chr20	31721507-31723409	+	ENSG00000281376.1
XLOC_030374	XLOC_030374	ACOXL-AS1	23237.1	chr2:110732538-111120610	TKS4_WT	TKS4_KO	0	23.3371	7.86648	0.1	23.3371	2.36805	11.7186	1.06887	7.86648	0	1	0	1	lncRNA	chr2	111098345-111116407	-	ENSG00000204581.3
XLOC_005635	XLOC_005635	ACTA2-AS1	265.046	chr10:88932683-89017059	TKS4_WT	TKS4_KO	124.043	452.814	1.86808	124.043	452.814	0.562348	288.428	2.46004	1.86808	0.245106	0.4731	0.325047	0.9999	lncRNA	chr10	88932390-88940820	+	ENSG00000180139.11
XLOC_030410	XLOC_030410	ACTR3-AS1	-27.4971	chr2:113831182-113962596	TKS4_WT	TKS4_KO	32.1878	23.3371	-0.463891	32.1878	23.3371	-0.139644	27.7625	1.44346	-0.463889	0	1	0	1	lncRNA	chr2	113831049-113891020	-	ENSG00000228857.3
XLOC_036418	XLOC_036418	ACVR2B-AS1	-22.2255	chr3:38346759-38493142	TKS4_WT	TKS4_KO	422.38	328.504	-0.362628	422.38	328.504	-0.109163	375.442	2.57454	-0.362631	-0.0305111	0.8302	0.0808173	0.9999	lncRNA	chr3	38451027-38454820	-	ENSG00000229589.1
XLOC_003861	XLOC_003861	ADAMTSL4-AS1	20.9798	chr1:150548563-150579738	TKS4_WT	TKS4_KO	255522	309130	0.274766	255522	309130	0.0827129	282326	5.45075	0.274766	0.30628	0.63775	0.19535	0.9999	lncRNA
XLOC_003860	XLOC_003860	ADAMTSL4-AS2	68715.7	chr1:150548563-150579738	TKS4_WT	TKS4_KO	0	68.8157		0.1	68.8157	2.83769	34.4579	1.53729	9.42659	0	1	0	1	lncRNA	chr1	150548562-150557724	-	ENSG00000237781.3
XLOC_010521	XLOC_010521	ADCY6-DT	-2.8812	chr12:48789146-48790535	TKS4_WT	TKS4_KO	146.814	142.584	-0.0421761	146.814	142.584	-0.0126967	144.699	2.16047	-0.0421774	-0.0198111	0.9663	0.014888	0.9999	lncRNA	chr12	48789147-48790535	+	ENSG00000257660.5
XLOC_024548	XLOC_024548	ADGRL1-AS1	26.7586	chr19:14137151-14206245	TKS4_WT	TKS4_KO	354.066	448.809	0.342082	354.066	448.809	0.102977	401.438	2.60362	0.342083	0	1	0	1	lncRNA	chr19	14137146-14171267	+	ENSG00000267169.2
XLOC_006698	XLOC_006698	ADIRF-AS1	7.10517	chr10:86965286-87010226	TKS4_WT	TKS4_KO	15391.6	16485.2	0.0990315	15391.6	16485.2	0.0298105	15938.4	4.20244	0.0990282	0.0512023	0.9516	0.0215456	0.9999	lncRNA	chr10	86965345-86971311	-	ENSG00000272734.1
XLOC_031842	XLOC_031842	ADNP-AS1	51.8684	chr20:50888917-50958564	TKS4_WT	TKS4_KO	169.585	257.546	0.602816	169.585	257.546	0.181467	213.565	2.32953	0.602822	0.0216297	0.75185	0.123869	0.9999	lncRNA	chr20	50930984-50945148	+	ENSG00000259456.4
XLOC_034110	XLOC_034110	ADORA2A-AS1	69911.2	chr22:24270816-24528681	TKS4_WT	TKS4_KO	0	70.0112		0.1	70.0112	2.84517	35.0556	1.54476	9.45144	0	1	0	1	lncRNA	chr22	24429206-24495074	-	ENSG00000178803.12
XLOC_016824	XLOC_016824	ADPGK-AS1	-22.8512	chr15:72751293-72798199	TKS4_WT	TKS4_KO	587.257	453.062	-0.374283	587.257	453.062	-0.112671	520.159	2.71614	-0.374284	-0.0408108	0.8403	0.0755656	0.9999	lncRNA	chr15	72782835-72798199	+	ENSG00000260898.6
XLOC_037895	XLOC_037895	AFAP1-AS1	-7.87606	chr4:7754089-7940296	TKS4_WT	TKS4_KO	417.671	384.775	-0.118354	417.671	384.775	-0.0356275	401.223	2.60339	-0.118352	-0.019561	0.948	0.0231917	0.9999	lncRNA	chr4	7754077-7778928	+	ENSG00000272620.2
XLOC_045872	XLOC_045872	AFDN-DT	-17.9039	chr6:167823889-167972023	TKS4_WT	TKS4_KO	257.503	211.4	-0.284611	257.503	211.4	-0.0856773	234.452	2.37005	-0.284614	-0.0235759	0.88	0.0555173	0.9999	lncRNA	chr6	167822103-167826833	-	ENSG00000198221.11
XLOC_029356	XLOC_029356	AGAP1-IT1	-1.84794	chr2:235494042-236131795	TKS4_WT	TKS4_KO	780.384	765.963	-0.0269087	780.384	765.963	-0.00810057	773.173	2.88828	-0.0269095	-0.00403403	0.98395	0.00702697	0.9999	lncRNA	chr2	235505553-235507566	+	ENSG00000235529.2
XLOC_010723	XLOC_010723	AGAP2-AS1	-17.6155	chr12:57723760-57742201	TKS4_WT	TKS4_KO	10221.4	8420.85	-0.279548	10221.4	8420.85	-0.0841545	9321.12	3.96947	-0.279555	-0.119799	0.8449	0.0731947	0.9999	lncRNA	chr12	57726271-57728356	+	ENSG00000255737.2
XLOC_050413	XLOC_050413	AGK-DT	-99.6893	chr7:141073401-141551308	TKS4_WT	TKS4_KO	32.1878	0	-8.33037	32.1878	0.1	-2.50769	16.1439	1.20801	-8.33037	0	1	0	1	lncRNA	chr7	141500079-141551304	-	ENSG00000261570.2
XLOC_045810	XLOC_045810	AIRN	46574.1	chr6:159969081-160111504	TKS4_WT	TKS4_KO	0	46.6741	8.86648	0.1	46.6741	2.66908	23.3871	1.36898	8.86648	0	1	0	1	lncRNA	chr6	160003291-160007664	-	ENSG00000268257.2
XLOC_035637	XLOC_035637	ALDH1L1-AS1	23237.1	chr3:126006356-126210169	TKS4_WT	TKS4_KO	0	23.3371	7.86648	0.1	23.3371	2.36805	11.7186	1.06887	7.86648	0	1	0	1	lncRNA
XLOC_001054	XLOC_001054	ALG14-AS1	44183.1	chr1:94974404-95072974	TKS4_WT	TKS4_KO	0	44.2831	8.79061	0.1	44.2831	2.64624	22.1915	1.34619	8.79061	0	1	0	1	lncRNA	chr1	95061596-95067545	+	ENSG00000230427.1
XLOC_028135	XLOC_028135	ALMS1-IT1	-47.4295	chr2:73385757-73609919	TKS4_WT	TKS4_KO	1289.14	677.707	-0.927676	1289.14	677.707	-0.279258	983.424	2.99274	-0.927675	-0.101185	0.56665	0.246685	0.9999	lncRNA	chr2	73456764-73459482	+	ENSG00000230002.3
XLOC_021768	XLOC_021768	ALOX12-AS1	283.105	chr17:6985122-7012334	TKS4_WT	TKS4_KO	59.6674	228.589	1.93774	59.6674	228.589	0.583318	144.128	2.15875	1.93774	0.750378	0.47345	0.324726	0.9999	lncRNA	chr17	6875232-7012530	-	ENSG00000215067.11
XLOC_030953	XLOC_030953	ANKRD44-IT1	-99.9379	chr2:196962616-197310787	TKS4_WT	TKS4_KO	160.939	0	-10.6523	160.939	0.1	-3.20666	80.5195	1.9059	-10.6523	0	1	0	1	lncRNA	chr2	197250858-197302519	-	ENSG00000236977.1
XLOC_029035	XLOC_029035	AOX3P-AOX2P	23.4834	chr2:200695722-200827338	TKS4_WT	TKS4_KO	762.321	941.34	0.304317	762.321	941.34	0.0916086	851.831	2.93035	0.304317	0.0113956	0.85155	0.0697898	0.9999	lncRNA
XLOC_001216	XLOC_001216	AP4B1-AS1	-49.0885	chr1:113812611-113914086	TKS4_WT	TKS4_KO	256.732	130.706	-0.973936	256.732	130.706	-0.293184	193.719	2.28717	-0.973938	-0.0865382	0.59795	0.223335	0.9999	lncRNA	chr1	113856635-113901237	+	ENSG00000226167.1
XLOC_031900	XLOC_031900	APCDD1L-DT	-58.8363	chr20:58459100-58619892	TKS4_WT	TKS4_KO	96.5635	39.7491	-1.28056	96.5635	39.7491	-0.385486	68.1563	1.83351	-1.28056	0	1	0	1	lncRNA	chr20	58515379-58619888	+	ENSG00000231290.6
XLOC_008343	XLOC_008343	APOA1-AS	39649.1	chr11:116835750-117098453	TKS4_WT	TKS4_KO	0	39.7491		0.1	39.7491	2.59933	19.9245	1.29939	8.63478	0	1	0	1	lncRNA	chr11	116836117-116856018	+	ENSG00000235910.2
XLOC_049968	XLOC_049968	APTR	-14.5928	chr7:77653340-77783022	TKS4_WT	TKS4_KO	5213.06	4452.33	-0.227569	5213.06	4452.33	-0.0685054	4832.69	3.68419	-0.22757	-0.0860656	0.9223	0.0351278	0.9999	lncRNA	chr7	77657659-77696277	-	ENSG00000214293.10
XLOC_008008	XLOC_008008	ARAP1-AS2	37.5773	chr11:72685068-72752408	TKS4_WT	TKS4_KO	32.1878	44.2831	0.460241	32.1878	44.2831	0.138547	38.2355	1.58247	0.460242	0	1	0	1	lncRNA	chr11	72700474-72705607	+	ENSG00000245148.2
XLOC_035210	XLOC_035210	ARF4-AS1	-51.2819	chr3:57556273-57693118	TKS4_WT	TKS4_KO	913.073	444.832	-1.03747	913.073	444.832	-0.312309	678.952	2.83184	-1.03747	-0.047413	0.47545	0.322895	0.9999	lncRNA	chr3	57597531-57600927	+	ENSG00000272146.6
XLOC_051256	XLOC_051256	ARFGEF1-DT	1137.77	chr8:67343833-67747114	TKS4_WT	TKS4_KO	27.4795	340.134	3.62968	27.4795	340.134	1.09264	183.807	2.26436	3.62968	0	1	0	1	lncRNA	chr8	67343975-67345087	+	ENSG00000271966.1
XLOC_030605	XLOC_030605	ARHGAP15-AS1	105.545	chr2:143070972-143768352	TKS4_WT	TKS4_KO	64.3756	132.321	1.03945	64.3756	132.321	0.312907	98.3483	1.99277	1.03946	0	1	0	1	lncRNA	chr2	143629133-143656179	-	ENSG00000231758.3
XLOC_006430	XLOC_006430	ARHGAP22-IT1	22.6067	chr10:48306672-48656265	TKS4_WT	TKS4_KO	459.276	563.103	0.294037	459.276	563.103	0.0885141	511.189	2.70858	0.294037	0.0411942	0.8929	0.0491972	0.9999	lncRNA	chr10	48510525-48511589	-	ENSG00000248682.1
XLOC_041218	XLOC_041218	ARHGAP26-IT1	35115.1	chr5:142770369-143229011	TKS4_WT	TKS4_KO	0	35.2151		0.1	35.2151	2.54673	17.6576	1.24693	8.46005	0	1	0	1	lncRNA	chr5	143192500-143194166	+	ENSG00000230789.1
XLOC_022615	XLOC_022615	ARHGAP27P1-BPTFP1	52.943	chr17:64749661-64781999	TKS4_WT	TKS4_KO	15706.5	24022	0.612997	15706.5	24022	0.18453	19864.2	4.29807	0.612995	0.63396	0.33675	0.472692	0.9999	lncRNA
XLOC_001045	XLOC_001045	ARHGAP29-AS1	247.681	chr1:94168904-94336179	TKS4_WT	TKS4_KO	284.212	988.152	1.79777	284.212	988.152	0.541181	636.182	2.80358	1.79777	0.0508801	0.1786	0.748119	0.9999	lncRNA	chr1	94247819-94411036	+	ENSG00000226835.4
XLOC_036954	XLOC_036954	ARHGAP31-AS1	22041.5	chr3:119294288-119420714	TKS4_WT	TKS4_KO	0	22.1415		0.1	22.1415	2.34521	11.1208	1.04613	7.79061	0	1	0	1	lncRNA	chr3	119314293-119322760	-	ENSG00000241155.1
XLOC_009629	XLOC_009629	ARHGAP42-AS1	81.8675	chr11:100684160-100993941	TKS4_WT	TKS4_KO	256.732	466.912	0.862887	256.732	466.912	0.259755	361.822	2.55849	0.862888	0.083271	0.65875	0.181279	0.9999	lncRNA	chr11	100684162-100687955	-	ENSG00000248027.1
XLOC_015221	XLOC_015221	ARHGAP5-AS1	-10.677	chr14:32072587-32159728	TKS4_WT	TKS4_KO	1128.97	1008.43	-0.162896	1128.97	1008.43	-0.0490366	1068.7	3.02886	-0.162896	-0.0147143	0.9278	0.0325456	0.9999	lncRNA	chr14	32074946-32076793	-	ENSG00000258655.2
XLOC_037267	XLOC_037267	ARHGEF26-AS1	101.398	chr3:154024400-154257827	TKS4_WT	TKS4_KO	146.814	295.68	1.01005	146.814	295.68	0.304054	221.247	2.34488	1.01005	0.124344	0.60425	0.218783	0.9999	lncRNA	chr3	154024401-154121347	-	ENSG00000243069.9
XLOC_001579	XLOC_001579	ARHGEF2-AS2	28.4051	chr1:155946838-155991262	TKS4_WT	TKS4_KO	257.503	330.647	0.360706	257.503	330.647	0.108582	294.075	2.46846	0.360703	0.0544704	0.8665	0.0622314	0.9999	lncRNA	chr1	155978799-155982986	+	ENSG00000273002.1
XLOC_049197	XLOC_049197	ARHGEF35-AS1	-99.8853	chr7:144186082-144380632	TKS4_WT	TKS4_KO	87.1469	0		87.1469	0.1	-2.94025	43.6234	1.63972	-9.76731		0.02475	1.60642	0.9999	lncRNA
[truncated: 1,821 more rows]

## Sheet: C (KOT_KO_lncRNA)
test_id	gene_id	gene	locus	sample_1	sample_2	value_1	value_2	log2(fold_change)	value_1_corrected	value_2_corrected	log2(fold_change)_corrected	test_stat	p_value	-log10(p_value)	q_value	type	chr_name	chr_location	chain	ENSG_id
[truncated: 1,878 more rows]

[truncated: 1 more sheets: D (KOT_WT_lncRNA)]
